# Supplementary material for: Handshakes in Cyberspace: Bridging the Cultural Differences through Effective Intercultural Communication and Collaboration.
Source: Royal Society of Chemistry journal article supplement (doi:10.1039/d2ra06660b), 2001-11-01
Supplement: d2ra06660b1.pdf [file d2ra06660b1.pdf]

## Supporting Information

### Effects of fluorine bonding and nonbonding interactions on $^{19}\text{F}$ chemical shifts

Yang Lu,<sup>a</sup> Mingming Sun,<sup>c</sup> Ning Xi,<sup>a,b,\*</sup>

<sup>a</sup>Institute of Drug Discovery Technology, Ningbo University, Ningbo, Zhejiang 315211, P. R. China

<sup>b</sup>School of Medicine, Ningbo University, Ningbo, Zhejiang 315211, P. R. China

<sup>c</sup> Department of Chemistry, Nanchang University, 999 Xuefu Avenue, Nanchang, 330031, PR China

## Contents

|                                                                                                                                            |           |
|--------------------------------------------------------------------------------------------------------------------------------------------|-----------|
| <b>1. X-ray crystallographic Data.....</b>                                                                                                 | <b>3</b>  |
| <b>2. Hammett plot.....</b>                                                                                                                | <b>4</b>  |
| <b>3. QM calculation results.....</b>                                                                                                      | <b>4</b>  |
| <b>4. Copies of <math>^1\text{H}</math>, <math>^{13}\text{C}</math>, and <math>^{19}\text{F}</math> NMR spectra for compounds 2-6.....</b> | <b>16</b> |

## 1. X-ray Crystallographic Studies

Single crystals of the compounds **2a**, **3a**, **5a**, **6d(a)** and **6h** suitable for X-ray diffraction were obtained from slow diffusion of heptane into a saturated solution of  $\text{CHCl}_3$ . Single crystal X-ray diffraction data was collected using an Agilent Technologies Gemini A Ultra system (Cu  $K\alpha$  radiation,  $\lambda = 1.5418 \text{ \AA}$ ). Data reduction and cell refinement were performed with the program of CrysAlis PRO. Data collection was performed under a stream of cooled nitrogen (Oxford Cryosystems: Crystream Controller 700). The structures were solved by the direct method using the SHELXS-97 programs and refined by the full-matrix least-squares method on  $F^2$ . All non-hydrogen atoms were refined with anisotropic displacement parameters. The positions of hydrogen atoms of H1N and H2N were located in Fourier difference electron density maps. All the other hydrogen atoms were placed in calculated positions with fixed isotropic thermal parameters and included in the structure factor calculations in the final stage of full-matrix least-squares refinement.

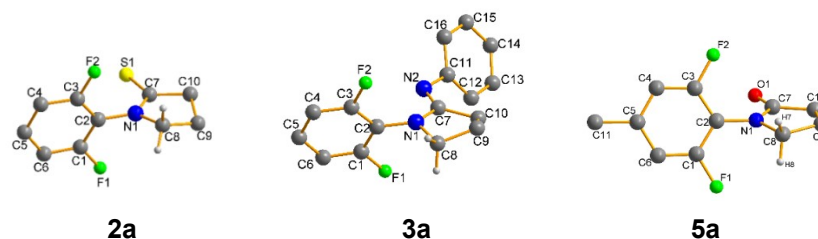

**Figure S1.** Computer-generated drawings of crystal structures of **2a**, **3a**, and **5a**.

## 2. Hammett plot

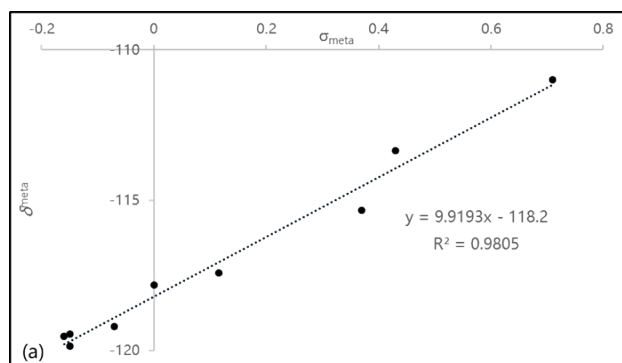

**Figure S2.** Hammett plots of  $^{19}\text{F}$  chemical shifts versus  $\sigma_{\text{meta}}$ :  $\delta^{\text{meta}} - \sigma_{\text{meta}}$  plot for compounds **5a-i**.

## 3. QM Calculation results

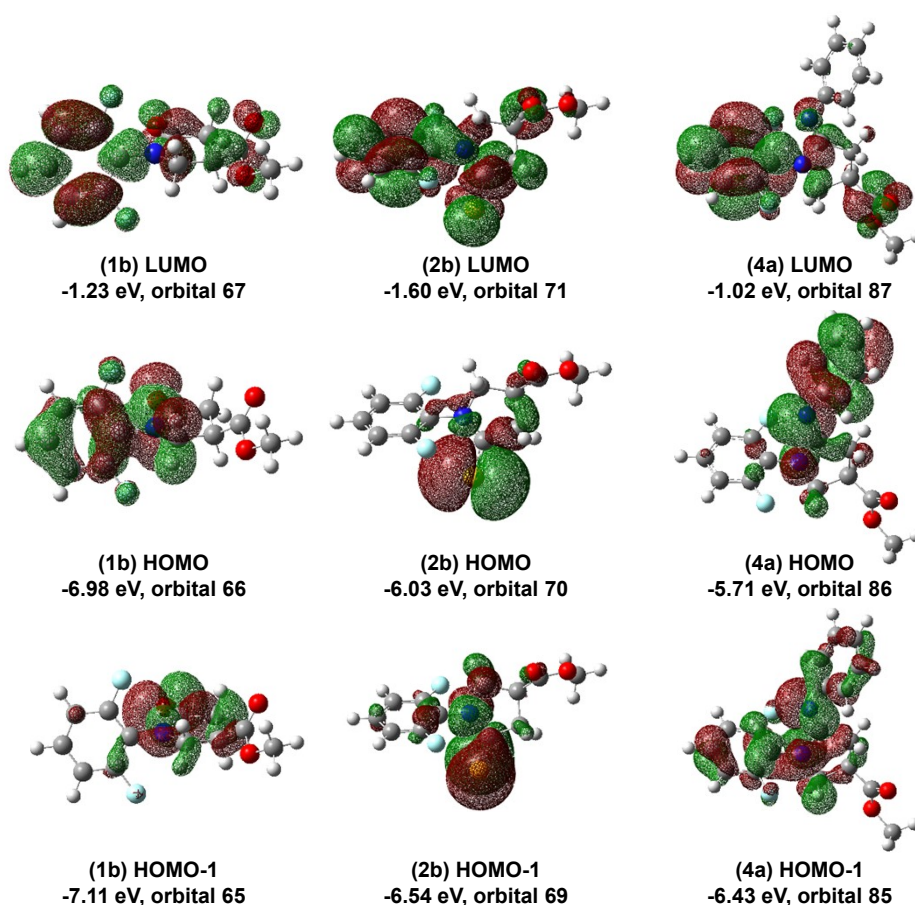

**Figure S3.** Energy levels of molecular orbitals in amide **1b**, thioamide **2b**, and amidine **4a** (on  $0.02 \text{ e}/\text{au}^3$  electron density surface).

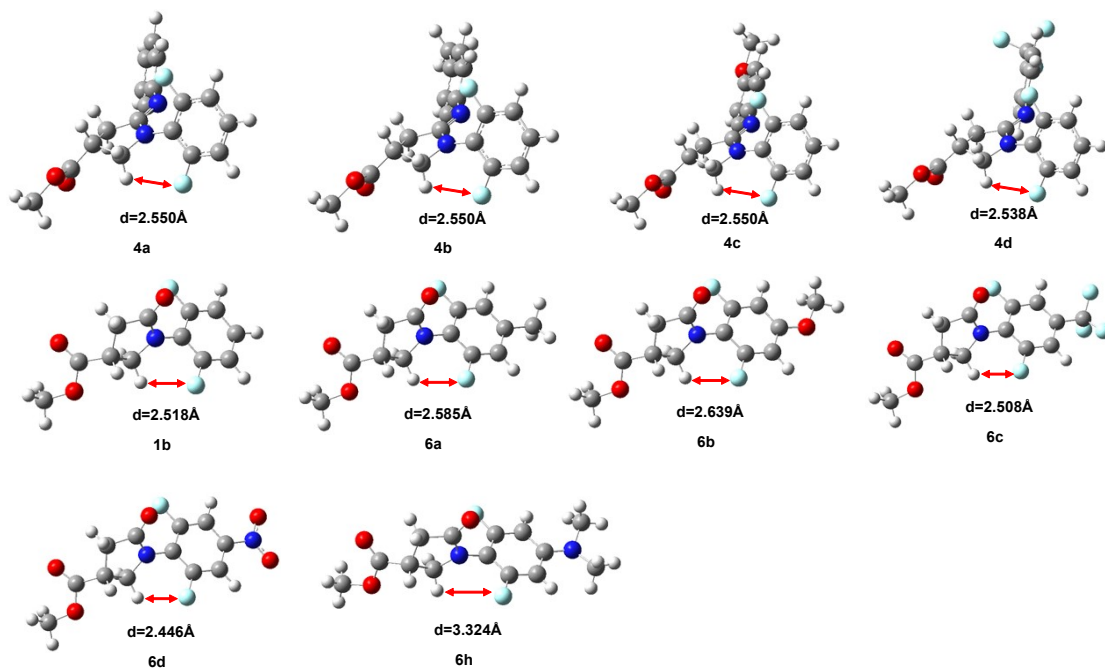

**Figure S4.** Distance between F and H of selected compounds.

**Cartesian coordinates (1b)**

|   |             |             |             |
|---|-------------|-------------|-------------|
| F | 1.43200100  | -2.11420300 | 1.27548700  |
| O | -3.89703500 | 1.05011200  | -0.57829500 |
| O | -3.76970200 | -1.20873500 | -0.21981900 |
| F | 1.94636300  | 1.82209500  | -1.39606300 |
| N | 0.32598100  | 0.25295700  | 0.27887800  |
| C | 3.53066800  | -1.67920200 | 0.20340500  |
| H | 3.90878100  | -2.59903300 | 0.62206400  |
| C | 1.65388700  | -0.11904400 | -0.02761200 |
| O | 0.82219900  | 2.24152700  | 1.39492300  |
| C | 4.32268500  | -0.84559000 | -0.59182700 |
| C | 2.22900500  | -1.29081400 | 0.47172900  |
| C | 3.79874100  | 0.33877000  | -1.11566300 |
| H | 4.38571700  | 0.99637500  | -1.73797700 |
| C | 2.48189900  | 0.66778200  | -0.83416800 |
| C | -3.30850200 | 0.08040100  | -0.09754200 |
| C | -2.00913400 | 0.10984900  | 0.66452100  |
| H | -2.14463000 | -0.47404500 | 1.57553800  |
| C | -1.51167500 | 1.52424200  | 1.00336000  |
| H | -1.86244100 | 2.24777300  | 0.26436200  |
| H | -1.83130300 | 1.87489200  | 1.98155300  |
| C | -0.84532600 | -0.53462700 | -0.15152100 |
| H | -0.72209100 | -1.58816600 | 0.08342500  |
| H | -0.99832400 | -0.42742500 | -1.22911300 |
| C | 0.00176300  | 1.43254800  | 0.94540800  |

|   |             |             |             |
|---|-------------|-------------|-------------|
| C | -5.02314200 | -1.40519200 | -0.96736600 |
| H | -5.83226600 | -0.86124100 | -0.48545300 |
| H | -5.19732800 | -2.47403500 | -0.93723000 |
| H | -4.90740400 | -1.05409100 | -1.99028100 |
| H | 5.34522500  | -1.12069200 | -0.80465500 |

**Cartesian coordinates (4a)**

|   |             |             |             |
|---|-------------|-------------|-------------|
| C | -0.21304600 | -4.81566200 | 0.19041100  |
| C | -0.73095200 | -4.06490300 | -0.86826400 |
| C | -0.41622100 | -2.71779000 | -0.95162400 |
| C | 0.37611300  | -2.05683100 | -0.00579200 |
| C | 0.86440500  | -2.85567200 | 1.03225400  |
| C | 0.60329300  | -4.21085200 | 1.14966800  |
| F | 1.66641700  | -2.24094900 | 2.00313400  |
| F | -0.88924700 | -1.99438400 | -2.04284200 |
| N | 0.66510200  | -0.67996900 | -0.09428800 |
| C | 2.03868100  | -0.14850200 | -0.15463400 |
| C | 1.80676800  | 1.30611400  | -0.65789100 |
| C | 0.39339900  | 1.65802400  | -0.15857900 |
| C | -0.31418700 | 0.31689000  | -0.03694700 |
| C | 2.87658900  | 2.24632200  | -0.16604300 |
| O | 2.75133300  | 3.10252900  | 0.71163700  |
| O | 4.06579500  | 2.01059400  | -0.81320800 |
| C | 5.22203800  | 2.82911500  | -0.41113000 |
| N | -1.55688400 | 0.02748600  | 0.08295300  |
| C | -2.59747800 | 0.98095100  | 0.15848600  |
| C | -3.66278900 | 0.87682600  | -0.75360600 |
| C | -4.73623500 | 1.76379600  | -0.68966900 |
| C | -4.77823500 | 2.75725900  | 0.29539700  |
| C | -3.73358700 | 2.85172500  | 1.21838600  |
| C | -2.64929400 | 1.97356800  | 1.15359600  |
| H | -0.44278100 | -5.86832300 | 0.26634500  |
| H | -1.35577900 | -4.50771000 | -1.62857000 |
| H | 1.01678500  | -4.76197200 | 1.98019700  |
| H | 2.51188600  | -0.16319800 | 0.83001100  |
| H | 2.64982600  | -0.72784300 | -0.84346700 |
| H | 1.83759400  | 1.29964600  | -1.74769000 |
| H | -0.14257100 | 2.32704300  | -0.82950000 |
| H | 0.45602400  | 2.15422600  | 0.81088500  |
| H | 6.03477400  | 2.48555300  | -1.03972100 |
| H | 5.00989900  | 3.88186900  | -0.58298000 |
| H | 5.44457800  | 2.66981200  | 0.64152700  |
| H | -3.62513400 | 0.09297800  | -1.49688600 |
| H | -5.54501400 | 1.67553500  | -1.40360700 |

|   |             |            |            |
|---|-------------|------------|------------|
| H | -3.76161300 | 3.60707700 | 1.99323600 |
| H | -1.85676600 | 2.03439100 | 1.88733900 |
| H | -5.61637300 | 3.43903600 | 0.34804500 |

Cartesian coordinates(4b)

|   |             |             |             |
|---|-------------|-------------|-------------|
| C | 1.94401500  | -4.58853500 | 0.21251800  |
| C | 1.19368500  | -4.09105700 | -0.85618200 |
| C | 0.97585300  | -2.72515100 | -0.94418500 |
| C | 1.44682100  | -1.81195500 | 0.00647200  |
| C | 2.18836600  | -2.36535800 | 1.05445200  |
| C | 2.45853500  | -3.71830100 | 1.17704900  |
| F | 2.68592200  | -1.49161300 | 2.03062800  |
| F | 0.27864100  | -2.23684200 | -2.04560100 |
| N | 1.19407600  | -0.42854300 | -0.08610200 |
| C | 2.26474800  | 0.58319100  | -0.13385900 |
| C | 1.50618100  | 1.83938400  | -0.65254700 |
| C | 0.06004000  | 1.63330900  | -0.16582400 |
| C | -0.09145100 | 0.12399700  | -0.04790800 |
| C | 2.13645300  | 3.11706400  | -0.16250000 |
| O | 1.69030800  | 3.86624400  | 0.70865100  |
| O | 3.33084400  | 3.34676300  | -0.80260900 |
| C | 4.08759500  | 4.54429700  | -0.40092300 |
| N | -1.13292600 | -0.61577500 | 0.05373100  |
| C | -2.46009000 | -0.13098600 | 0.10906000  |
| C | -3.40414500 | -0.67766500 | -0.77842400 |
| C | -4.73402000 | -0.26961900 | -0.73815700 |
| C | -5.18078100 | 0.67857500  | 0.19910100  |
| C | -4.23921900 | 1.20245000  | 1.09399000  |
| C | -2.89891900 | 0.80950300  | 1.05476700  |
| H | 2.12908000  | -5.64970700 | 0.29211400  |
| H | 0.79279000  | -4.73843000 | -1.62088700 |
| H | 3.03960200  | -4.07059400 | 2.01535400  |
| H | 2.69387600  | 0.75284800  | 0.85655000  |
| H | 3.05986100  | 0.27648000  | -0.81017700 |
| H | 1.54781700  | 1.83794200  | -1.74202300 |
| H | -0.68313700 | 2.05279800  | -0.84165300 |
| H | -0.07513900 | 2.11565500  | 0.80324100  |
| H | 4.97325500  | 4.53277400  | -1.02479200 |
| H | 3.49268400  | 5.43716100  | -0.57903700 |
| H | 4.34849600  | 4.48527700  | 0.65334200  |
| H | -3.06790400 | -1.41970900 | -1.48903000 |
| H | -5.44096900 | -0.69837300 | -1.43883900 |
| H | -4.55567500 | 1.92597400  | 1.83574300  |
| H | -2.19946600 | 1.21087200  | 1.77583300  |

|   |             |            |             |
|---|-------------|------------|-------------|
| C | -6.63368400 | 1.09631600 | 0.24760800  |
| H | -6.99156800 | 1.41729800 | -0.73391500 |
| H | -7.27706100 | 0.27334500 | 0.57227500  |
| H | -6.78477000 | 1.92390200 | 0.94186200  |

**Cartesian coordinates(4c)**

|   |             |             |             |
|---|-------------|-------------|-------------|
| C | 2.33573300  | -4.56385500 | 0.18131800  |
| C | 1.55317000  | -4.07484700 | -0.86797000 |
| C | 1.31218500  | -2.71220400 | -0.94664700 |
| C | 1.79083300  | -1.79423700 | -0.00435300 |
| C | 2.56509900  | -2.33947700 | 1.02428600  |
| C | 2.85897700  | -3.68837500 | 1.13633100  |
| F | 3.07175500  | -1.46119700 | 1.99170000  |
| F | 0.58256500  | -2.23260800 | -2.03089600 |
| N | 1.51537300  | -0.41474100 | -0.08568800 |
| C | 2.56980700  | 0.61277800  | -0.15130000 |
| C | 1.78238800  | 1.85845300  | -0.65129400 |
| C | 0.35190500  | 1.63140500  | -0.12900300 |
| C | 0.22186400  | 0.11933900  | -0.01879700 |
| C | 2.40628900  | 3.14443000  | -0.17515300 |
| O | 1.97537000  | 3.88178900  | 0.71359700  |
| O | 3.57605600  | 3.39715700  | -0.85102900 |
| C | 4.32499500  | 4.60526700  | -0.46655500 |
| N | -0.80497400 | -0.63913000 | 0.09607200  |
| C | -2.14173700 | -0.18318400 | 0.17681000  |
| C | -3.10085500 | -0.81459100 | -0.62804000 |
| C | -4.44736900 | -0.44714600 | -0.57394700 |
| C | -4.85619600 | 0.55262300  | 0.31496600  |
| C | -3.91654500 | 1.17454500  | 1.14400300  |
| C | -2.57486600 | 0.81266000  | 1.07530900  |
| H | 2.53909400  | -5.62223500 | 0.25311200  |
| H | 1.14512100  | -4.72609700 | -1.62559600 |
| H | 3.46475700  | -4.03381800 | 1.95986900  |
| H | 3.01581800  | 0.78676800  | 0.83091700  |
| H | 3.35590900  | 0.31979200  | -0.84407300 |
| H | 1.79751300  | 1.85779600  | -1.74141500 |
| H | -0.41382100 | 2.04743200  | -0.78157100 |
| H | 0.23895000  | 2.10611800  | 0.84680200  |
| H | 5.19068200  | 4.61179100  | -1.11792300 |
| H | 3.70993700  | 5.48884300  | -0.62094800 |
| H | 4.61980500  | 4.54532400  | 0.57867900  |
| H | -2.77109600 | -1.59716800 | -1.29643300 |
| H | -5.15728200 | -0.94855800 | -1.21490100 |
| H | -4.26004800 | 1.93056000  | 1.83538500  |



|   |             |             |             |
|---|-------------|-------------|-------------|
| H | -1.86366800 | 1.28096200  | 1.74150500  |
| O | -6.17489600 | 0.99400300  | 0.45971400  |
| C | -7.20878300 | 0.38251500  | -0.35182100 |
| H | -8.12858800 | 0.88108000  | -0.06376800 |
| H | -7.02492200 | 0.54062400  | -1.41750200 |
| H | -7.29343000 | -0.68805700 | -0.14917900 |

**Cartesian coordinates(4d)**

|   |             |             |             |
|---|-------------|-------------|-------------|
| C | 3.32326800  | -4.36315200 | 0.26029500  |
| C | 2.55246600  | -3.96813100 | -0.83640700 |
| C | 2.17021000  | -2.64036900 | -0.94179800 |
| C | 2.49554700  | -1.67315400 | 0.01535200  |
| C | 3.26422900  | -2.12362200 | 1.09190800  |
| C | 3.69418900  | -3.43247200 | 1.23439800  |
| F | 3.61674900  | -1.18891500 | 2.07350400  |
| F | 1.44628300  | -2.24426100 | -2.06317800 |
| N | 2.07923300  | -0.32921000 | -0.09987900 |
| C | 3.02436800  | 0.80292000  | -0.14903100 |
| C | 2.12858500  | 1.96056400  | -0.67851700 |
| C | 0.70555100  | 1.57638300  | -0.23206300 |
| C | 0.74396600  | 0.06332400  | -0.09099600 |
| C | 2.58214400  | 3.30175700  | -0.16030800 |
| O | 2.01959500  | 3.97741500  | 0.70332800  |
| O | 3.75475400  | 3.68344400  | -0.76300200 |
| C | 4.34645800  | 4.96270000  | -0.33343300 |
| N | -0.20718700 | -0.79339100 | 0.00741700  |
| C | -1.57509100 | -0.48402500 | 0.05036600  |
| C | -2.42634400 | -1.07482100 | -0.90390700 |
| C | -3.79508800 | -0.84256900 | -0.87155900 |
| C | -4.34854700 | -0.03642900 | 0.13384200  |
| C | -3.51506900 | 0.54277400  | 1.09738100  |
| C | -2.14213400 | 0.31748600  | 1.06014600  |
| H | 3.63549400  | -5.39276100 | 0.35461300  |
| H | 2.25941200  | -4.66421200 | -1.60713100 |
| H | 4.28640700  | -3.70741500 | 2.09348200  |
| H | 3.42398300  | 1.02199500  | 0.84347700  |
| H | 3.85343400  | 0.58632300  | -0.81906200 |
| H | 2.19733200  | 1.97777000  | -1.76627300 |
| H | -0.06079100 | 1.88858700  | -0.93937500 |
| H | 0.47627400  | 2.04949100  | 0.72408900  |
| H | 5.24357800  | 5.06553500  | -0.93180200 |
| H | 3.65034100  | 5.77597400  | -0.52468400 |
| H | 4.58279400  | 4.92665900  | 0.72752200  |
| H | -1.98775700 | -1.71344700 | -1.65655600 |

|   |             |             |             |
|---|-------------|-------------|-------------|
| H | -4.43965100 | -1.29961500 | -1.60844700 |
| H | -3.94182500 | 1.15225400  | 1.88065900  |
| H | -1.50620000 | 0.73927400  | 1.82572100  |
| C | -5.80111500 | 0.26002600  | 0.12789400  |
| F | -6.57369200 | -0.80275500 | -0.36398800 |
| F | -6.30301900 | 0.56604200  | 1.40071800  |
| F | -6.13493100 | 1.36653000  | -0.68183200 |

**Cartesian coordinates(4e)**

|   |             |             |             |
|---|-------------|-------------|-------------|
| C | 2.80101500  | -4.44009500 | 0.31563200  |
| C | 2.06421600  | -4.02489500 | -0.79691700 |
| C | 1.73983900  | -2.68346000 | -0.92095100 |
| C | 2.09212000  | -1.72159300 | 0.03160100  |
| C | 2.82466200  | -2.19170600 | 1.12456500  |
| C | 3.19617600  | -3.51603800 | 1.28659000  |
| F | 3.20138400  | -1.26154900 | 2.10096400  |
| F | 1.04743700  | -2.26775700 | -2.05503800 |
| N | 1.73544900  | -0.36139900 | -0.10359400 |
| C | 2.73155100  | 0.72636600  | -0.16664100 |
| C | 1.88958200  | 1.91844700  | -0.70769600 |
| C | 0.44847100  | 1.60046800  | -0.26682000 |
| C | 0.42172300  | 0.08929100  | -0.10882500 |
| C | 2.39790000  | 3.24238800  | -0.19487300 |
| O | 1.85322600  | 3.95190300  | 0.65281400  |
| O | 3.59585400  | 3.56189500  | -0.78224300 |
| C | 4.24080200  | 4.81710000  | -0.35695800 |
| N | -0.56861500 | -0.72347500 | -0.01197600 |
| C | -1.91961700 | -0.37335100 | 0.03690700  |
| C | -2.79703800 | -0.95275400 | -0.90559800 |
| C | -4.15646600 | -0.68235300 | -0.86775700 |
| C | -4.65800700 | 0.16073300  | 0.13045900  |
| C | -3.81628800 | 0.73000500  | 1.08945600  |
| C | -2.45393900 | 0.46310900  | 1.04166600  |
| N | -6.08288800 | 0.44342000  | 0.17581000  |
| H | 3.06800200  | -5.48086000 | 0.42488400  |
| H | 1.75351200  | -4.71632000 | -1.56487600 |
| H | 3.76319000  | -3.80706900 | 2.15726400  |
| H | 3.14201400  | 0.93593400  | 0.82329600  |
| H | 3.54849100  | 0.46390200  | -0.83501900 |
| H | 1.96436200  | 1.92635400  | -1.79516900 |
| H | -0.29912700 | 1.93716400  | -0.98286400 |
| H | 0.23339000  | 2.09342900  | 0.68269000  |
| H | 5.15120400  | 4.87012700  | -0.94150200 |
| H | 3.58705500  | 5.65979900  | -0.56895900 |

|   |             |             |             |
|---|-------------|-------------|-------------|
| H | 4.45792200  | 4.78219000  | 0.70808600  |
| H | -2.38218300 | -1.61255300 | -1.65304000 |
| H | -4.83669200 | -1.11105400 | -1.58650500 |
| H | -4.23865400 | 1.36592300  | 1.85142500  |
| H | -1.79794800 | 0.87781400  | 1.79366500  |
| O | -6.83270300 | -0.08669900 | -0.70260100 |
| O | -6.51909600 | 1.21029800  | 1.09060400  |

**Cartesian coordinates(4f)**

|   |             |             |             |
|---|-------------|-------------|-------------|
| C | 2.89991200  | -4.44910000 | 0.28622700  |
| C | 2.11041500  | -4.02570800 | -0.78606600 |
| C | 1.78872900  | -2.68173200 | -0.89405000 |
| C | 2.19042000  | -1.71991900 | 0.04109600  |
| C | 2.97600400  | -2.20097400 | 1.09344100  |
| C | 3.34975900  | -3.52714600 | 1.23488900  |
| F | 3.40893500  | -1.27833500 | 2.05615200  |
| F | 1.05771600  | -2.26714700 | -2.00353500 |
| N | 1.83227900  | -0.36283200 | -0.06828800 |
| C | 2.82090500  | 0.72795300  | -0.11571200 |
| C | 1.97385800  | 1.91135100  | -0.66636300 |
| C | 0.54757000  | 1.60828000  | -0.17264400 |
| C | 0.50252100  | 0.09225100  | -0.04650000 |
| C | 2.50687900  | 3.24395700  | -0.21006500 |
| O | 2.00856800  | 3.97940700  | 0.64462500  |
| O | 3.67970000  | 3.54795200  | -0.86043800 |
| C | 4.34447300  | 4.80786600  | -0.48941900 |
| N | -0.47622200 | -0.72868700 | 0.04652800  |
| C | -1.84537600 | -0.37219400 | 0.07975700  |
| C | -2.74534500 | -1.17262100 | -0.64282600 |
| C | -4.11140900 | -0.91683000 | -0.64185200 |
| C | -4.65420100 | 0.15252600  | 0.11248200  |
| C | -3.74987700 | 0.93617300  | 0.86571800  |
| C | -2.37988000 | 0.67901900  | 0.84291300  |
| N | -6.02574000 | 0.41352800  | 0.12065900  |
| C | -6.55785700 | 1.50305800  | 0.93281200  |
| C | -6.93829700 | -0.44048900 | -0.63324500 |
| H | 3.16577500  | -5.49177000 | 0.38062400  |
| H | 1.75860200  | -4.71271300 | -1.54036900 |
| H | 3.95890800  | -3.82073900 | 2.07593000  |
| H | 3.21971000  | 0.94874700  | 0.87762500  |
| H | 3.64883800  | 0.47536400  | -0.77497200 |
| H | 2.01670700  | 1.88405400  | -1.75553400 |
| H | -0.22706600 | 1.97131700  | -0.84633000 |
| H | 0.38733700  | 2.08801400  | 0.79423100  |

|   |             |             |             |
|---|-------------|-------------|-------------|
| H | 5.22732200  | 4.84880200  | -1.11611800 |
| H | 3.68370900  | 5.64919900  | -0.68567800 |
| H | 4.61133700  | 4.79355300  | 0.56495300  |
| H | -2.34439100 | -2.00120200 | -1.20981800 |
| H | -4.75778100 | -1.55765500 | -1.22184000 |
| H | -4.11081800 | 1.74687900  | 1.48011400  |
| H | -1.72765300 | 1.28514900  | 1.45665500  |
| H | -6.36362800 | 1.35557200  | 2.00174100  |
| H | -6.13146100 | 2.47003400  | 0.64534400  |
| H | -7.63460500 | 1.55978100  | 0.79291800  |
| H | -6.70660100 | -0.43917800 | -1.70364300 |
| H | -6.91387100 | -1.47999400 | -0.28604500 |
| H | -7.95381000 | -0.07115600 | -0.51269800 |

Cartesian coordinates(**6a**)

|   |             |             |             |
|---|-------------|-------------|-------------|
| F | 1.16374500  | -1.89425300 | 1.48443400  |
| O | -4.27491900 | 0.86068100  | -0.71752100 |
| O | -4.04123400 | -1.36667700 | -0.23699900 |
| F | 1.55077400  | 1.89955600  | -1.40403500 |
| N | -0.04703900 | 0.34318500  | 0.31320200  |
| C | 3.26546800  | -1.39715400 | 0.45181200  |
| H | 3.67541400  | -2.26667200 | 0.94396000  |
| C | 1.30873400  | 0.02911300  | 0.06834600  |
| O | 0.30253900  | 2.40589100  | 1.34725000  |
| C | 4.05780300  | -0.57836200 | -0.36825600 |
| C | 1.93599500  | -1.07221400 | 0.65410200  |
| C | 3.46491600  | 0.54021300  | -0.97288900 |
| H | 4.03187500  | 1.19901000  | -1.61386700 |
| C | 2.12377800  | 0.80861800  | -0.75636700 |
| C | -3.65238200 | -0.04972300 | -0.16837700 |
| C | -2.38264700 | 0.08857800  | 0.63037500  |
| H | -2.51557800 | -0.45901400 | 1.56402400  |
| C | -1.97429700 | 1.54281500  | 0.91545200  |
| H | -2.33701600 | 2.20998600  | 0.13063600  |
| H | -2.34648000 | 1.92100000  | 1.86437200  |
| C | -1.15845200 | -0.52600900 | -0.11754400 |
| H | -0.98640300 | -1.55961700 | 0.16998300  |
| H | -1.28031300 | -0.47607900 | -1.20336700 |
| C | -0.45660500 | 1.53172900  | 0.91127700  |
| C | -5.25668500 | -1.66791800 | -1.01159600 |
| H | -6.10882500 | -1.14399900 | -0.58472700 |
| H | -5.37630000 | -2.74160400 | -0.93026700 |
| H | -5.12483800 | -1.36416700 | -2.04765500 |
| C | 5.50956300  | -0.91088500 | -0.61783700 |

|   |            |             |             |
|---|------------|-------------|-------------|
| H | 5.94336700 | -1.45211000 | 0.22311100  |
| H | 5.62077800 | -1.53946900 | -1.50595300 |
| H | 6.10070500 | -0.00926500 | -0.77908600 |

Cartesian coordinates(6b)

|   |             |             |             |
|---|-------------|-------------|-------------|
| F | 0.77873200  | -1.88598000 | 1.61290300  |
| O | -4.56734000 | 0.87813400  | -0.83239700 |
| O | -4.37025000 | -1.35591000 | -0.36695500 |
| F | 1.26565800  | 1.87535600  | -1.30066900 |
| N | -0.39393900 | 0.33403800  | 0.37399100  |
| C | 2.91359300  | -1.39724400 | 0.66449900  |
| H | 3.33941600  | -2.25111700 | 1.16549500  |
| C | 0.97094900  | 0.02206700  | 0.18196800  |
| O | -0.08493700 | 2.38192300  | 1.44899500  |
| C | 3.71740500  | -0.57162400 | -0.13545000 |
| C | 1.58189100  | -1.07172900 | 0.80861800  |
| C | 3.16629300  | 0.53773400  | -0.78657900 |
| H | 3.74346100  | 1.19512500  | -1.41500400 |
| C | 1.81295700  | 0.79361500  | -0.61737500 |
| C | -3.97574200 | -0.04269200 | -0.26647100 |
| C | -2.74094300 | 0.07757500  | 0.58792900  |
| H | -2.91341800 | -0.48794900 | 1.50414400  |
| C | -2.34328700 | 1.52541800  | 0.91783700  |
| H | -2.67466900 | 2.20850500  | 0.13288200  |
| H | -2.75245500 | 1.88487500  | 1.85883600  |
| C | -1.48688300 | -0.52425200 | -0.12014500 |
| H | -1.32778400 | -1.56365300 | 0.15435400  |
| H | -1.56337600 | -0.45360800 | -1.20903500 |
| C | -0.82651300 | 1.51289400  | 0.97322500  |
| C | -5.55209600 | -1.63977600 | -1.19794700 |
| H | -6.41861100 | -1.11371200 | -0.80390700 |
| H | -5.68298300 | -2.71329200 | -1.13342200 |
| H | -5.37204500 | -1.32645700 | -2.22386500 |
| O | 5.04656100  | -0.94304200 | -0.22472500 |
| C | 5.96010000  | -0.13206900 | -1.01753800 |
| H | 6.01559400  | 0.88676100  | -0.63024300 |
| H | 6.92412600  | -0.61735300 | -0.91547100 |
| H | 5.66218000  | -0.11909700 | -2.06758300 |

Cartesian coordinates(6c)

|   |             |             |             |
|---|-------------|-------------|-------------|
| F | 0.30642600  | -1.69275900 | 1.60605500  |
| O | -5.17721800 | 0.60313400  | -0.87470100 |
| O | -4.79628500 | -1.56406900 | -0.23624100 |
| F | 0.62557400  | 2.09327300  | -1.30225300 |

|   |             |             |             |
|---|-------------|-------------|-------------|
| N | -0.96463600 | 0.45542300  | 0.33929100  |
| C | 2.42510500  | -1.08247500 | 0.69213600  |
| H | 2.87118400  | -1.91263400 | 1.21605600  |
| C | 0.41494600  | 0.22546900  | 0.17920200  |
| O | -0.79665500 | 2.61136900  | 1.21633600  |
| C | 3.18891800  | -0.20270600 | -0.08176200 |
| C | 1.07079200  | -0.83565100 | 0.81233300  |
| C | 2.59001900  | 0.87344100  | -0.74170200 |
| H | 3.16231900  | 1.55713900  | -1.34800000 |
| C | 1.22493300  | 1.05637000  | -0.60354800 |
| C | -4.51308400 | -0.22042900 | -0.24392700 |
| C | -3.29165400 | 0.06909400  | 0.59103000  |
| H | -3.43417200 | -0.40442600 | 1.56304800  |
| C | -2.99259800 | 1.56696500  | 0.76374700  |
| H | -3.36339800 | 2.13854700  | -0.08993900 |
| H | -3.43181700 | 1.99778300  | 1.65995200  |
| C | -1.99964300 | -0.52544500 | -0.05012700 |
| H | -1.77507400 | -1.51529600 | 0.33574400  |
| H | -2.07512000 | -0.57781500 | -1.13943900 |
| C | -1.48136000 | 1.66243000  | 0.82075900  |
| C | -5.95479300 | -2.01260600 | -1.02872500 |
| H | -6.86055200 | -1.53337700 | -0.66471100 |
| H | -5.99158000 | -3.08489400 | -0.87953600 |
| H | -5.80767900 | -1.76560000 | -2.07759000 |
| C | 4.64244500  | -0.47118500 | -0.27603600 |
| F | 4.88118700  | -1.32807600 | -1.36272900 |
| F | 5.37153700  | 0.69166200  | -0.53163000 |
| F | 5.22366000  | -1.08748800 | 0.83566300  |

**Cartesian coordinates(6d)**

|   |             |             |             |
|---|-------------|-------------|-------------|
| F | 0.61110700  | -1.88818400 | 1.39245300  |
| O | -4.83930000 | 0.72740100  | -0.78952400 |
| O | -4.49326100 | -1.48615400 | -0.30924100 |
| F | 0.99826500  | 2.13904900  | -1.16644500 |
| N | 4.92903800  | -0.56673100 | -0.36518400 |
| N | -0.61180200 | 0.40151900  | 0.34449400  |
| C | 2.73559400  | -1.25235500 | 0.51549900  |
| H | 3.18541700  | -2.13520800 | 0.93800100  |
| C | 0.75730300  | 0.15305700  | 0.14932000  |
| O | -0.38146300 | 2.49152200  | 1.35798200  |
| C | 3.49575300  | -0.31947600 | -0.18909800 |
| C | 1.39045900  | -0.98286800 | 0.67163600  |
| C | 2.93823000  | 0.83335100  | -0.73827500 |
| H | 3.53947500  | 1.53410900  | -1.29310500 |

|   |             |             |             |
|---|-------------|-------------|-------------|
| C | 1.58071900  | 1.03419300  | -0.56692600 |
| C | -4.18376100 | -0.15126400 | -0.22809600 |
| C | -2.94563100 | 0.05631900  | 0.60729100  |
| H | -3.08993200 | -0.47136400 | 1.55077900  |
| C | -2.60758700 | 1.53320200  | 0.86626200  |
| H | -2.97430900 | 2.16423800  | 0.05357600  |
| H | -3.02573700 | 1.91947800  | 1.79228900  |
| C | -1.67720200 | -0.53071200 | -0.08501800 |
| H | -1.47281200 | -1.54649900 | 0.23877700  |
| H | -1.76686500 | -0.51658500 | -1.17424300 |
| C | -1.09478500 | 1.58943800  | 0.90929200  |
| C | -5.67230400 | -1.85711800 | -1.11208400 |
| H | -6.56299200 | -1.38881900 | -0.69994600 |
| H | -5.72687800 | -2.93640500 | -1.03803000 |
| H | -5.53654800 | -1.53915400 | -2.14318400 |
| O | 5.60522400  | 0.29231200  | -1.00171500 |
| O | 5.41198100  | -1.62754400 | 0.12837800  |

**Cartesian coordinates(6h)**

|   |             |            |             |
|---|-------------|------------|-------------|
| F | -0.28370000 | 2.91350000 | 3.47680000  |
| O | 5.84330000  | 5.97430000 | 3.64800000  |
| O | 4.06260000  | 7.27720000 | 3.95810000  |
| F | 2.71790000  | 3.33700000 | -0.08280000 |
| N | -1.60170000 | 1.53730000 | -0.89680000 |
| N | 2.29110000  | 3.60530000 | 2.62450000  |
| C | -0.95520000 | 2.26570000 | 1.33200000  |
| H | -1.80540000 | 2.02810000 | 1.68100000  |
| C | 1.26800000  | 3.15760000 | 1.74030000  |
| O | 3.29670000  | 1.56420000 | 2.85350000  |
| C | -0.67510000 | 2.08470000 | -0.03400000 |
| C | 0.00920000  | 2.79110000 | 2.15540000  |
| C | 0.58520000  | 2.47680000 | -0.49580000 |
| H | 0.80720000  | 2.39040000 | -1.41560000 |
| C | 1.49490000  | 2.98700000 | 0.38790000  |
| C | 4.66700000  | 6.09400000 | 3.82570000  |
| C | 3.68850000  | 4.95790000 | 3.93750000  |
| H | 3.25990000  | 4.98890000 | 4.83980000  |
| C | 4.32310000  | 3.59560000 | 3.74210000  |
| H | 5.14170000  | 3.66670000 | 3.18990000  |
| H | 4.56140000  | 3.19230000 | 4.61420000  |
| C | -2.79030000 | 0.91570000 | -0.34510000 |
| H | -2.52910000 | 0.18090000 | 0.24890000  |
| H | -3.34380000 | 0.56510000 | -1.07430000 |
| H | -3.30090000 | 1.58020000 | 0.16330000  |

|   |             |            |             |
|---|-------------|------------|-------------|
| C | -1.14440000 | 1.01140000 | -2.17390000 |
| H | -0.73190000 | 1.73220000 | -2.69500000 |
| H | -1.90740000 | 0.64710000 | -2.66980000 |
| H | -0.48590000 | 0.30290000 | -2.01930000 |
| C | 2.58100000  | 5.01870000 | 2.85250000  |
| H | 1.78160000  | 5.50110000 | 3.18120000  |
| H | 2.90930000  | 5.45600000 | 2.02710000  |
| C | 3.27890000  | 2.77180000 | 3.04310000  |
| C | 4.93960000  | 8.43850000 | 3.87730000  |
| H | 5.60270000  | 8.39840000 | 4.59870000  |
| H | 4.40790000  | 9.25670000 | 3.96770000  |
| H | 5.39850000  | 8.44180000 | 3.01200000  |

#### 4. Copies of $^1\text{H}$ , $^{13}\text{C}$ , and $^{19}\text{F}$ NMR spectra for Compounds 2-6

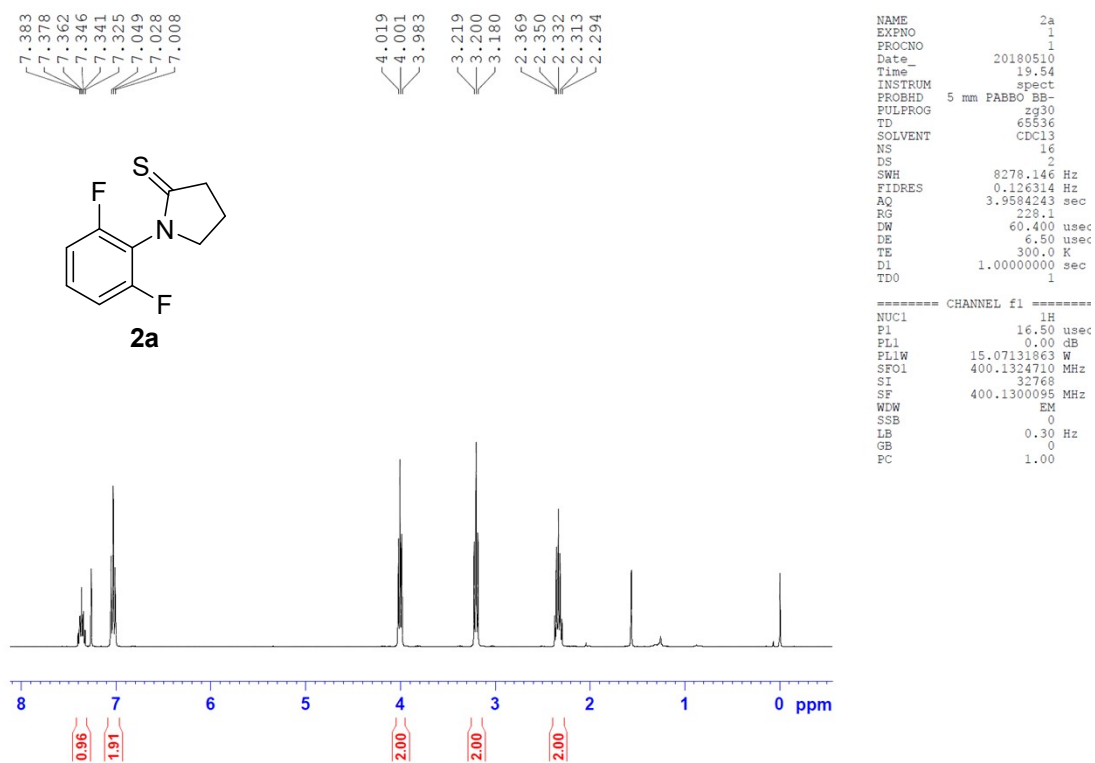



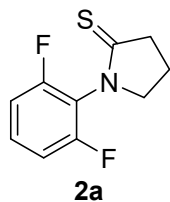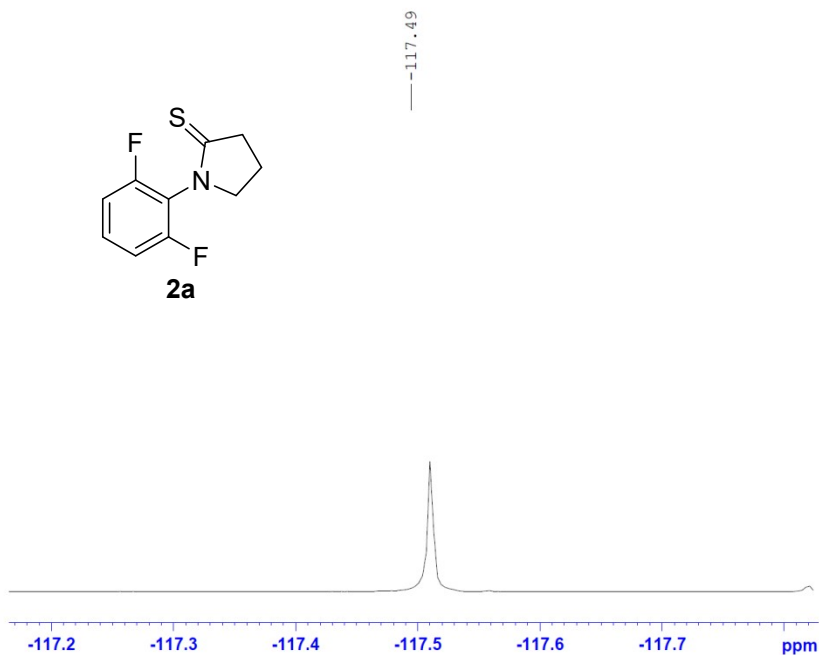

```

NAME          2a
EXPNO         7
PROCNO        1
Date_         20161228
Time         14.30
INSTRUM       spect
PROBHD        5 mm PABBO BB-
PULPROG       zgfhiggn
TD            131072
SOLVENT       CDCl3
NS            32
DS            4
SWH           75187.969 Hz
FIDRES        0.573639 Hz
AQ            0.8716788 sec
RG            1290.2
DW            6.650 usec
DE            6.50 usec
TE            300.0 K
D1            1.00000000 sec
D11           0.03000000 sec
D12           0.00002000 sec
TD0           1
  
```

```

===== CHANNEL f1 =====
NUC1          19F
P1            15.00 usec
PL1           3.21 dB
SF01          376.4682462 MHz
  
```

```

===== CHANNEL f2 =====
CPDPRG2      waltz16
NUC2          1H
PCPD2        80.00 usec
PL2           0.00 dB
PL12         13.84 dB
PL2W         15.07131863 W
PL12W        0.62251705 W
SF02         400.1316005 MHz
SI            65536
SF           376.4985497 MHz
WDW           EM
SSB           0
LB            0.30 Hz
GB            0
PC            1.00
  
```

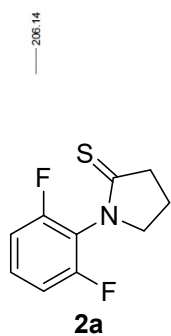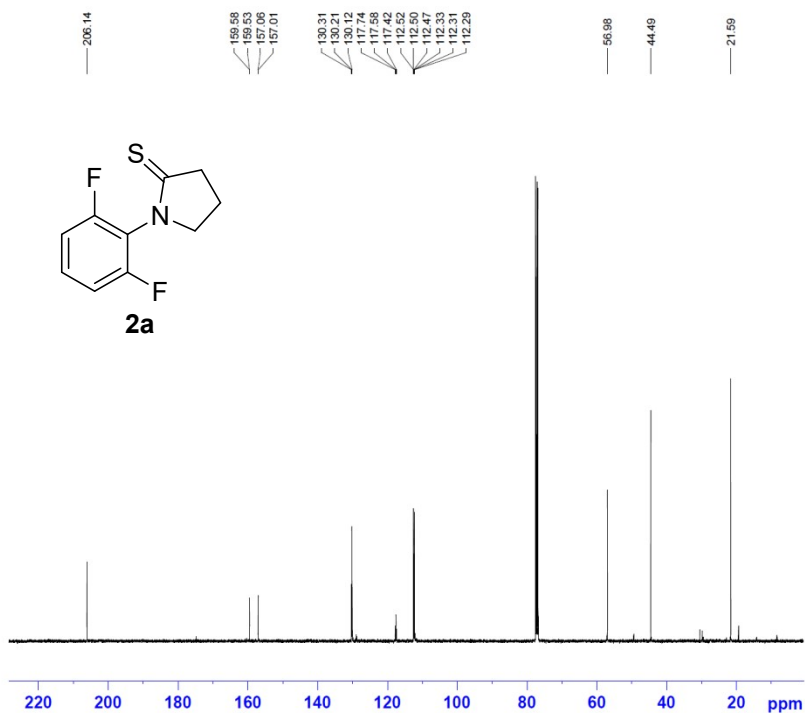

```

NAME          2a
EXPNO         5
PROCNO        1
Date_         20160530
Time         13.25
INSTRUM       spect
PROBHD        5 mm PABBO BB-
PULPROG       zgpg30
TD            65536
SOLVENT       CDCl3
NS            2048
DS            4
SWH           23980.814 Hz
FIDRES        0.365918 Hz
AQ            1.3664756 sec
RG            8192
DW            20.850 usec
DE            6.50 usec
TE            300.0 K
D1            2.00000000 sec
D11           0.03000000 sec
TD0           1
  
```

```

===== CHANNEL f1 =====
NUC1          13C
P1            15.50 usec
PL1           -1.23 dB
PL1W         50.01396179 W
SF01          100.6238364 MHz
  
```

```

===== CHANNEL f2 =====
CPDPRG2      waltz16
NUC2          1H
PCPD2        80.00 usec
PL2           0.00 dB
PL12         13.84 dB
PL13         18.00 dB
PL2W         15.07131863 W
PL12W        0.62251705 W
PL13W        0.23886430 W
SF02         400.1316005 MHz
SI            32768
SF           100.6127612 MHz
WDW           EM
SSB           0
LB            1.00 Hz
GB            0
PC            1.40
  
```

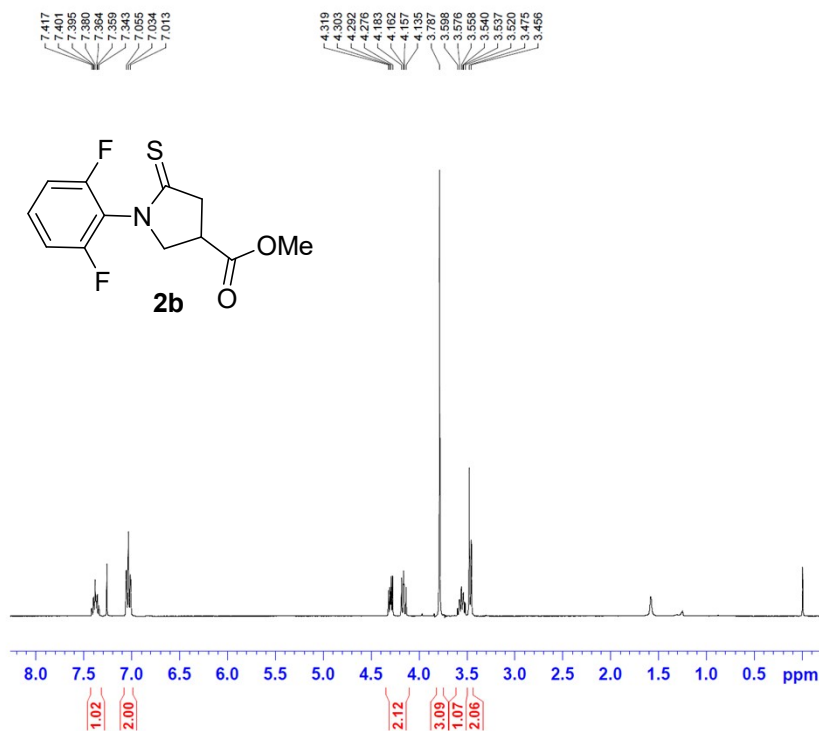

```

NAME          2b
EXPNO         1
PROCNO        1
Date_         20180510
Time          19.44
INSTRUM       spect
PROBHD        5 mm PABBO BB-
PULPROG       zg30
TD            65536
SOLVENT       CDCl3
NS            16
DS            2
SWH           8278.146 Hz
FIDRES        0.126314 Hz
AQ           3.9584243 sec
RG            181
DE            60.400 usec
TE            300.0 K
D1            1.00000000 sec
TD0           1

===== CHANNEL f1 =====
NUC1          1H
P1            16.50 usec
PL1           0.00 dB
PL1W         15.07131863 W
SF01         400.1324710 MHz
SI           32768
SF           400.1300094 MHz
WDW           EM
SSB           0
LB            0.30 Hz
GB            0
PC            1.00

```

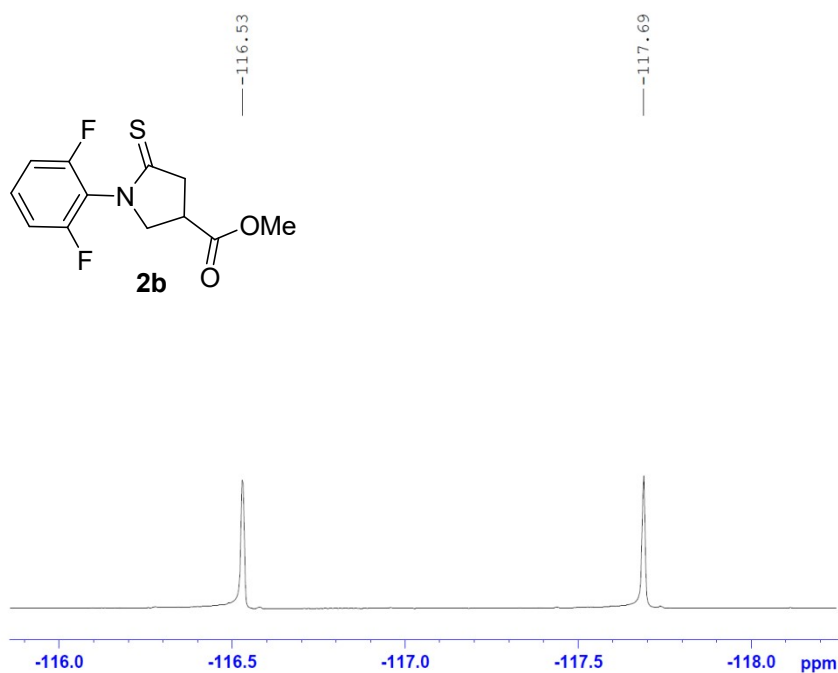

```

NAME          2b
EXPNO         7
PROCNO        1
Date_         20180712
Time          14.51
INSTRUM       spect
PROBHD        5 mm PABBO BB-
PULPROG       zgfhigpn
TD            131072
SOLVENT       CDCl3
NS            32
DS            4
SWH           75187.969 Hz
FIDRES        0.573639 Hz
AQ           0.8716788 sec
RG            4096
DE            6.650 usec
TE            300.0 K
D1            1.00000000 sec
D11           0.03000000 sec
D12           0.00002000 sec
TD0           1

===== CHANNEL f1 =====
NUC1          13C
P1            15.00 usec
PL1           3.21 dB
SF01         376.4682462 MHz

===== CHANNEL f2 =====
CPDPRG2      waitz16
NUC2          1H
PCPD2        80.00 usec
PL2           0.00 dB
PL12         13.71 dB
PL12W       15.07131863 W
SF02         400.1316005 MHz
SI           65536
SF           376.4985589 MHz
WDW           EM
SSB           0
LB            0.30 Hz
GB            0
PC            1.00

```

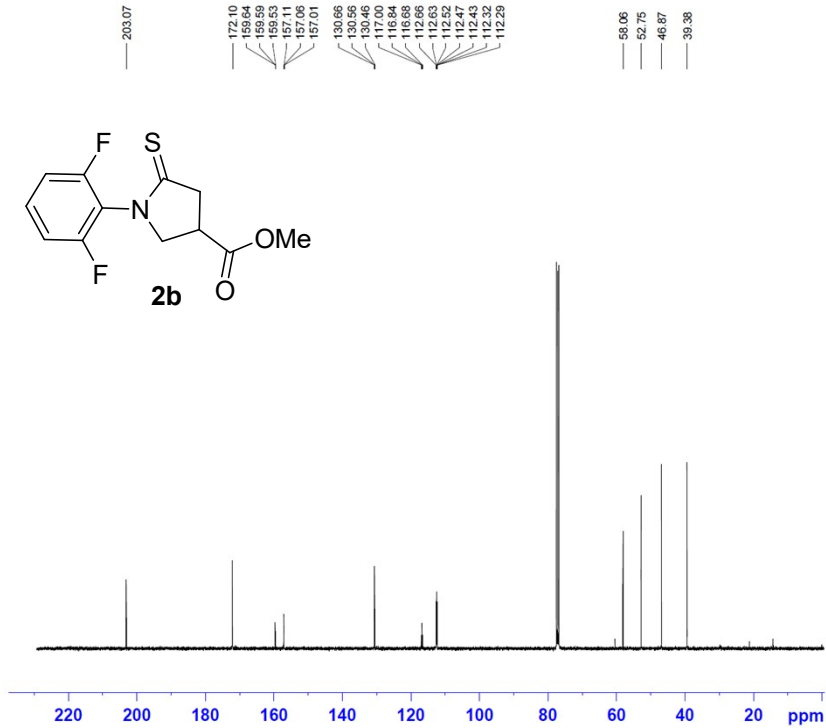

```

NAME          2b
EXPNO         5
PROCNO        1
Date_         20160512
Time_         13.31
INSTRUM       spect
PROBHD        5 mm PABBO BB-
PULPROG       zgpg30
TD            65536
SOLVENT       CDCl3
NS            1104
DS            4
SWH           23980.814 Hz
FIDRES        0.365918 Hz
AQ            1.3664756 sec
RG            14596.5
DW            20.850 usec
DE            6.50 usec
TE            300.0 K
D1            2.00000000 sec
D11           0.03000000 sec
TDO           1
  
```

```

===== CHANNEL f1 =====
NUC1          13C
P1            15.50 usec
PL1           -1.23 dB
PL1W          50.01396179 W
SF01          100.6238364 MHz

===== CHANNEL f2 =====
CPDPRG2       waltz16
NUC2          1H
PCPD2         80.00 usec
PL2            0.00 dB
PL12           13.84 dB
PL13           18.00 dB
PL2W          15.07131863 W
PL12W         0.62251705 W
PL13W         0.23886430 W
SF02          400.1316005 MHz
SI            32768
SF            100.6127608 MHz
WDW           EM
SSB            0
LB            1.00 Hz
GB            0
PC            1.40
  
```

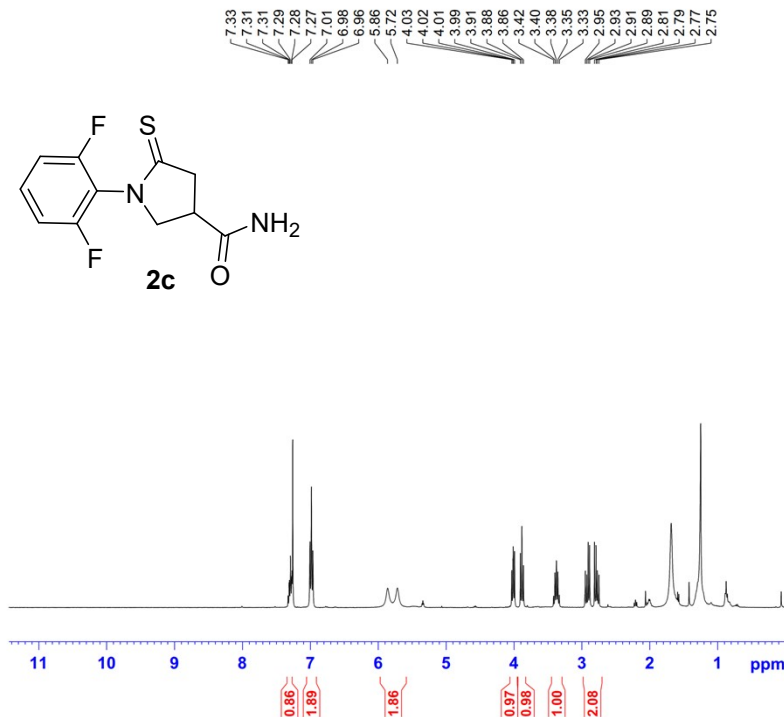

```

NAME          JOCamidine 2c
EXPNO         1
PROCNO        1
Date_         20160612
Time_         9.00
INSTRUM       spect
PROBHD        5 mm PABBO BB-
PULPROG       zg30
TD            65536
SOLVENT       CDCl3
NS            16
DS            2
SWH           8278.146 Hz
FIDRES        0.126314 Hz
AQ            3.9584243 sec
RG            228.1
DW            60.400 usec
DE            6.50 usec
TE            300.0 K
D1            1.00000000 sec
D11           1
TDO           1
  
```

```

===== CHANNEL f1 =====
NUC1          1H
P1            16.25 usec
PL1            0.00 dB
PL1W          15.07131863 W
SF01          400.1324710 MHz
SI            32768
SF            400.1300095 MHz
WDW           EM
SSB            0
LB            0.30 Hz
GB            0
PC            1.00
  
```

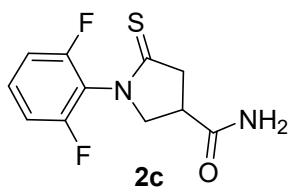

— -116.8094  
— -118.1491

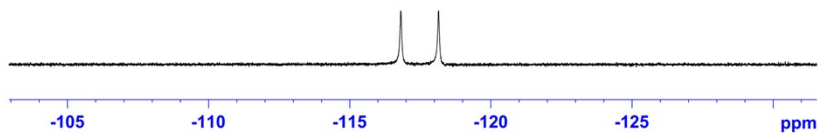

```

NAME      JOCamidine 2c
EXPNO    7
PROCNO    1
Date_     20161228
Time      14.37
INSTRUM   spect
PROBHD    5 mm PABBO BB-
PULPROG   zgpg30
TD         131072
SOLVENT   CDCl3
NS         32
DS         4
SWH        75187.969 Hz
FIDRES     0.573639 Hz
AQ         0.8716788 sec
RG         4096
DW         6.650 usec
DE         6.50 usec
TE         300.0 K
D1         1.00000000 sec
D11        0.03000000 sec
D12        0.00002000 sec
TD0        1
  
```

```

===== CHANNEL f1 =====
NUC1      19F
P1        15.00 usec
PL1       3.21 dB
SFO1      376.4682462 MHz
  
```

```

===== CHANNEL f2 =====
CPDPRG2   waltz16
NUC2       1H
PCPD2     80.00 usec
PL2        0.00 dB
PL12       13.84 dB
PL2W       15.07131863 W
PL12W      0.62251705 W
SFO2       400.1316005 MHz
SI         65536
SF         376.4985532 MHz
WDW        EM
SSB         0
LB          0.30 Hz
GB          0
PC          1.00
  
```

173.63 172.43 160.37 160.33 157.86 157.81  
129.59 129.49 129.39 115.11 114.95 114.78 112.45 112.23  
51.40 38.57 34.17

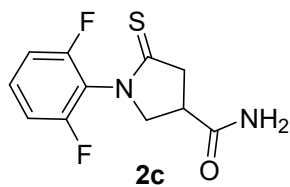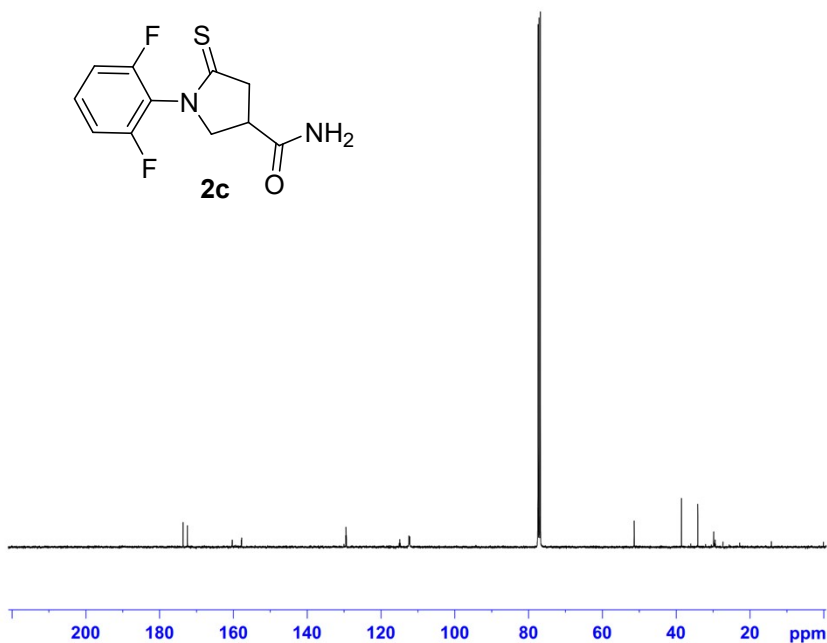

```

NAME      JOCamidine 2c
EXPNO    5
PROCNO    1
Date_     20160618
Time      11.54
INSTRUM   spect
PROBHD    5 mm PABBO BB-
PULPROG   zgpg30
TD         65536
SOLVENT   CDCl3
NS         5120
DS         4
SWH        23980.814 Hz
FIDRES     0.365918 Hz
AQ         1.3664756 sec
RG         9195.2
DW         20.850 usec
DE         6.50 usec
TE         300.0 K
D1         2.00000000 sec
D11        0.03000000 sec
TD0        1
  
```

```

===== CHANNEL f1 =====
NUC1      13C
P1        15.50 usec
PL1       -1.23 dB
PL1W      50.01396179 W
SFO1      100.6238364 MHz
  
```

```

===== CHANNEL f2 =====
CPDPRG2   waltz16
NUC2       1H
PCPD2     80.00 usec
PL2        0.00 dB
PL12       13.84 dB
PL13       18.00 dB
PL2W       15.07131863 W
PL12W      0.62251705 W
PL13W      0.23886430 W
SFO2       400.1316005 MHz
SI         32768
SF         100.6127531 MHz
WDW        EM
SSB         0
LB          1.00 Hz
GB          0
PC          1.40
  
```

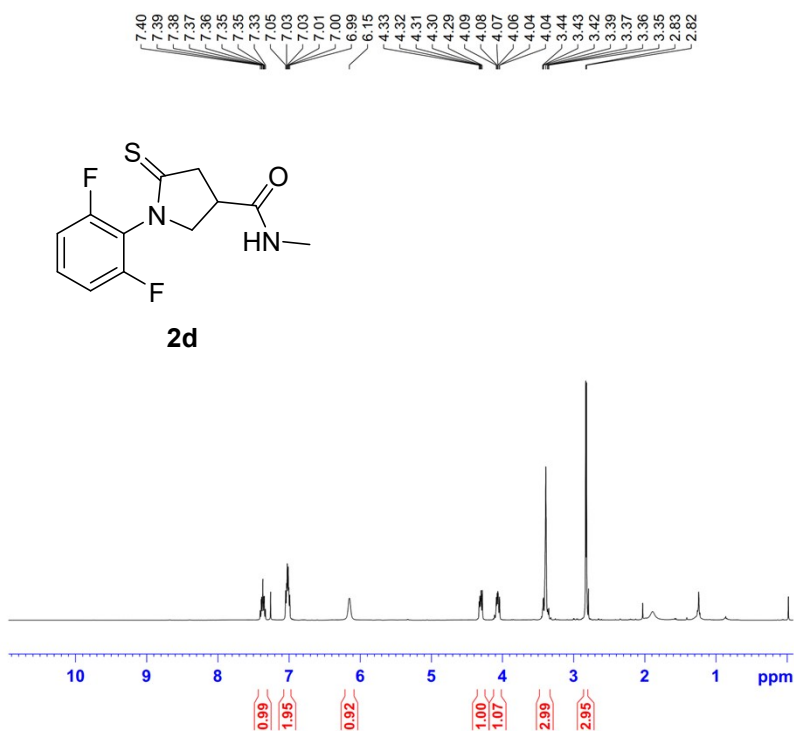

```

NAME      JOCamidine 2d
EXPNO    1
PROCNO   1
Date_    20160607
Time     9.49
INSTRUM  spect
PROBHD   5 mm PABBO BB-
PULPROG  zg30
TD        65536
SOLVENT  CDCl3
NS        16
DS        2
SWH       8278.146 Hz
FIDRES    0.126314 Hz
AQ        3.9584243 sec
RG        90.5
DW        60.400 usec
DE        6.50 usec
TE        300.0 K
D1        1.00000000 sec
D11       1
D12       1
D13       1
D14       1
D15       1
D16       1
D17       1
D18       1
D19       1
D20       1
D21       1
D22       1
D23       1
D24       1
D25       1
D26       1
D27       1
D28       1
D29       1
D30       1
D31       1
D32       1
D33       1
D34       1
D35       1
D36       1
D37       1
D38       1
D39       1
D40       1
D41       1
D42       1
D43       1
D44       1
D45       1
D46       1
D47       1
D48       1
D49       1
D50       1
D51       1
D52       1
D53       1
D54       1
D55       1
D56       1
D57       1
D58       1
D59       1
D60       1
D61       1
D62       1
D63       1
D64       1
D65       1
D66       1
D67       1
D68       1
D69       1
D70       1
D71       1
D72       1
D73       1
D74       1
D75       1
D76       1
D77       1
D78       1
D79       1
D80       1
D81       1
D82       1
D83       1
D84       1
D85       1
D86       1
D87       1
D88       1
D89       1
D90       1
D91       1
D92       1
D93       1
D94       1
D95       1
D96       1
D97       1
D98       1
D99       1
D100      1

```

```

===== CHANNEL f1 =====
NUC1      1H
P1        16.25 usec
PL1       0.00 dB
PL1W      15.07131863 W
SFO1      400.1324710 MHz
SI        32768
SF        400.1300090 MHz
WDW       EM
SSB       0
LB        0.30 Hz
GB        0
PC        1.00

```

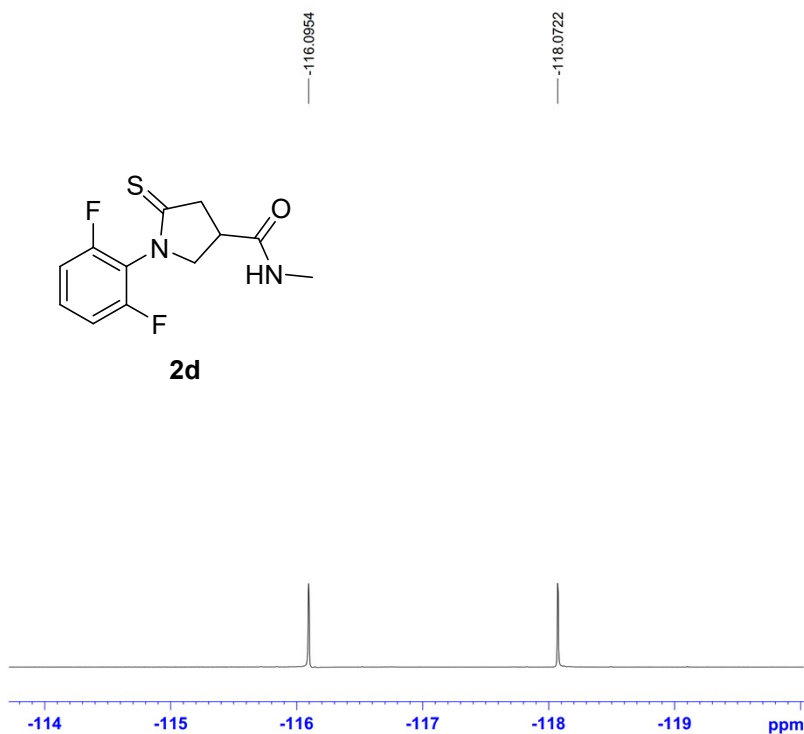

```

NAME      JOCamidine 2d
EXPNO    7
PROCNO   1
Date_    20161227
Time     9.52
INSTRUM  spect
PROBHD   5 mm PABBO BB-
PULPROG  zgfhigqn
TD        131072
SOLVENT  CDCl3
NS        32
DS        4
SWH       75187.969 Hz
FIDRES    0.573639 Hz
AQ        0.8716788 sec
RG        2048
DW        6.650 usec
DE        6.50 usec
TE        300.0 K
D1        1.00000000 sec
D11       0.03000000 sec
D12       0.00002000 sec
D13       1
D14       1
D15       1
D16       1
D17       1
D18       1
D19       1
D20       1
D21       1
D22       1
D23       1
D24       1
D25       1
D26       1
D27       1
D28       1
D29       1
D30       1
D31       1
D32       1
D33       1
D34       1
D35       1
D36       1
D37       1
D38       1
D39       1
D40       1
D41       1
D42       1
D43       1
D44       1
D45       1
D46       1
D47       1
D48       1
D49       1
D50       1
D51       1
D52       1
D53       1
D54       1
D55       1
D56       1
D57       1
D58       1
D59       1
D60       1
D61       1
D62       1
D63       1
D64       1
D65       1
D66       1
D67       1
D68       1
D69       1
D70       1
D71       1
D72       1
D73       1
D74       1
D75       1
D76       1
D77       1
D78       1
D79       1
D80       1
D81       1
D82       1
D83       1
D84       1
D85       1
D86       1
D87       1
D88       1
D89       1
D90       1
D91       1
D92       1
D93       1
D94       1
D95       1
D96       1
D97       1
D98       1
D99       1
D100      1

```

```

===== CHANNEL f1 =====
NUC1      19F
P1        15.00 usec
PL1       3.21 dB
SFO1      376.4682462 MHz

```

```

===== CHANNEL f2 =====
CPDPRG2  waltz16
NUC2      1H
PCPD2    80.00 usec
PL2       0.00 dB
PL12     13.84 dB
PL2W     15.07131863 W
PL12W    0.62251705 W
SFO2     400.1316005 MHz
SI        65536
SF        376.4985486 MHz
WDW       EM
SSB       0
LB        0.30 Hz
GB        0
PC        1.00

```

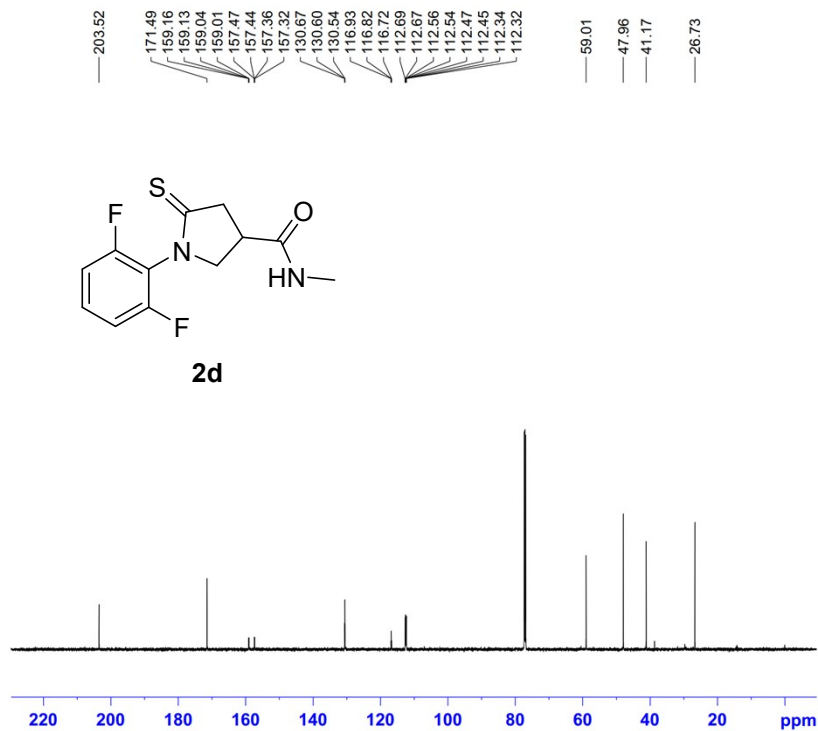

```

NAME      JOCamidine 2d
EXPNO    5
PROCNO   1
Date_    20160612
Time     15.19
INSTRUM  spect
PROBHD   5 mm PABBO BB/
PULPROG  zgpg30
TD       65536
SOLVENT  CDCl3
NS       230
DS       4
SWH      36057.691 Hz
FIDRES   0.550197 Hz
AQ       0.9088159 sec
RG       192.21
DW       13.867 usec
DE       6.50 usec
TE       298.4 K
D1       2.0000000 sec
D11     0.0300000 sec
TD0     1

===== CHANNEL f1 =====
SFO1    150.8892301 MHz
NUC1    13C
P1      11.00 usec
SI      32768
SF      150.8726243 MHz
WDW     EM
SSB     0
LB      1.00 Hz
GB      0
PC      1.40

```

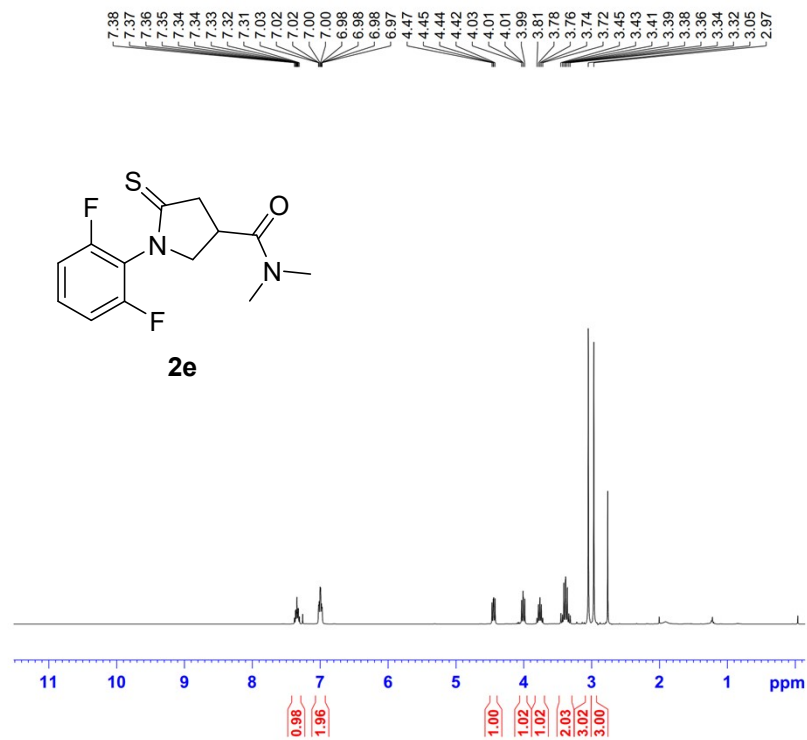

```

NAME      JOCamidine 2e
EXPNO    1
PROCNO   1
Date_    20160608
Time     9.39
INSTRUM  spect
PROBHD   5 mm PABBO BB-
PULPROG  zg30
TD       65536
SOLVENT  CDCl3
NS       16
DS       2
SWH      8278.146 Hz
FIDRES   0.126314 Hz
AQ       3.9584243 sec
RG       64
DW       60.400 usec
DE       6.50 usec
TE       300.0 K
D1       1.0000000 sec
TD0     1

===== CHANNEL f1 =====
NUC1    1H
P1      16.25 usec
PL1     0.00 dB
PL1W   15.07131863 W
SFO1    400.1324710 MHz
SI      32768
SF      400.1300093 MHz
WDW     EM
SSB     0
LB      0.30 Hz
GB      0
PC      1.00

```

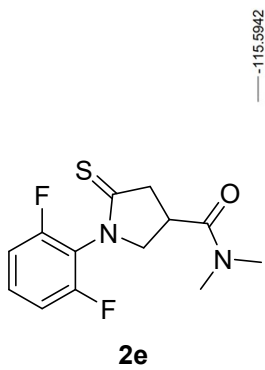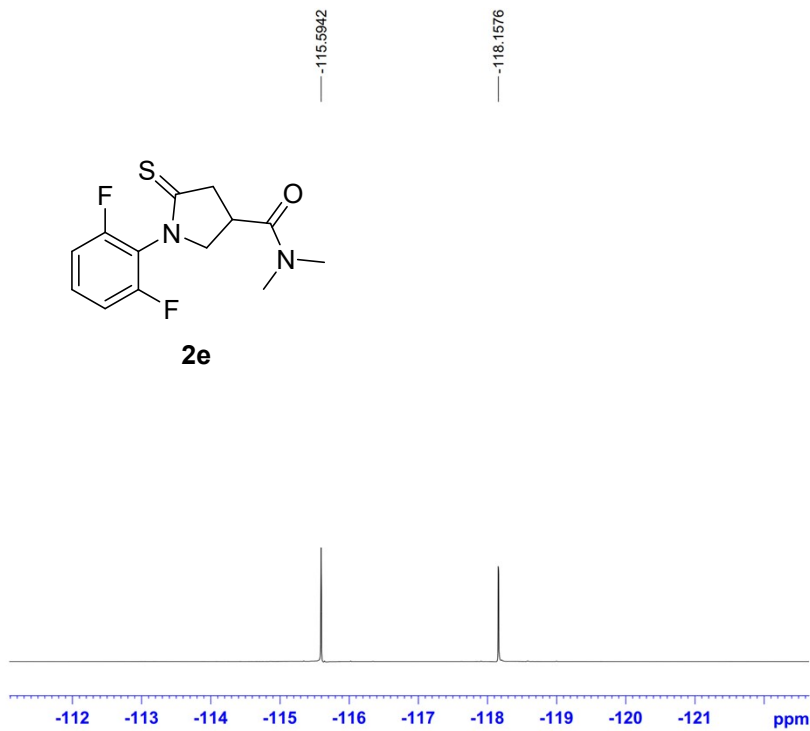

```

NAME      JOCamideine 2e
EXPNO    7
PROCNO    1
Date_    20161227
Time     10.15
INSTRUM   spect
PROBHD    5 mm PABBO BB-
PULPROG   zgfhlggn
TD        131072
SOLVENT   CDCl3
NS        32
DS        4
SWH       75187.969 Hz
FIDRES    0.573639 Hz
AQ        0.8716788 sec
RG        1290.2
DW        6.650 usec
DE        6.50 usec
TE        300.0 K
D1        1.00000000 sec
D11       0.03000000 sec
D12       0.00002000 sec
TD0       1
  
```

```

===== CHANNEL f1 =====
NUC1      19F
P1        15.00 usec
PL1       3.21 dB
SFO1     376.4682462 MHz
  
```

```

===== CHANNEL f2 =====
CPDPRG2   waltz16
NUC2      1H
PCPD2     80.00 usec
PL2       0.00 dB
PL12     13.84 dB
PL2W     15.07131863 W
PL12W    0.62251705 W
SFO2     400.1316005 MHz
SI        65536
SF        376.4985452 MHz
WDW       EM
SSB       0
LB        0.30 Hz
GB        0
PC        1.00
  
```

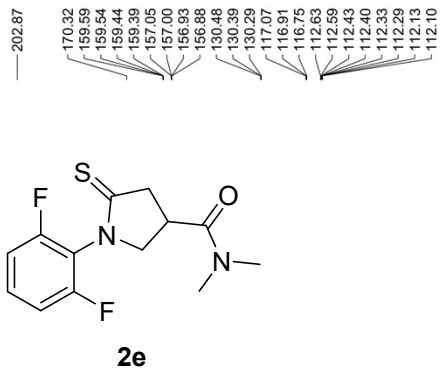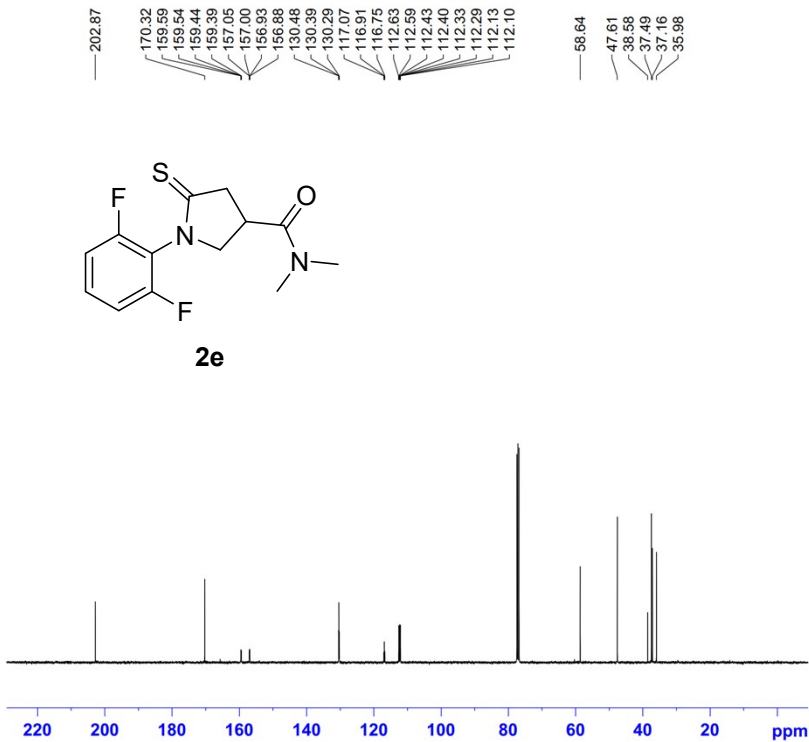

```

NAME      JOCamideine 2e
EXPNO    5
PROCNO    1
Date_    20160613
Time     13.39
INSTRUM   spect
PROBHD    5 mm PABBO BB-
PULPROG   zgpg30
TD        65536
SOLVENT   CDCl3
NS        664
DS        4
SWH       23980.814 Hz
FIDRES    0.365918 Hz
AQ        1.3664756 sec
RG        9195.2
DW        20.850 usec
DE        6.50 usec
TE        300.0 K
D1        2.00000000 sec
D11       0.03000000 sec
TD0       1
  
```

```

===== CHANNEL f1 =====
NUC1      13C
P1        15.50 usec
PL1       -1.23 dB
PL1W     50.01396179 W
SFO1     100.6238364 MHz
  
```

```

===== CHANNEL f2 =====
CPDPRG2   waltz16
NUC2      1H
PCPD2     80.00 usec
PL2       0.00 dB
PL12     13.84 dB
PL13     18.00 dB
PL2W     15.07131863 W
PL12W    0.62251705 W
PL13W    0.23886430 W
SFO2     400.1316005 MHz
SI        32768
SF        100.6127678 MHz
WDW       EM
SSB       0
LB        1.00 Hz
GB        0
PC        1.40
  
```

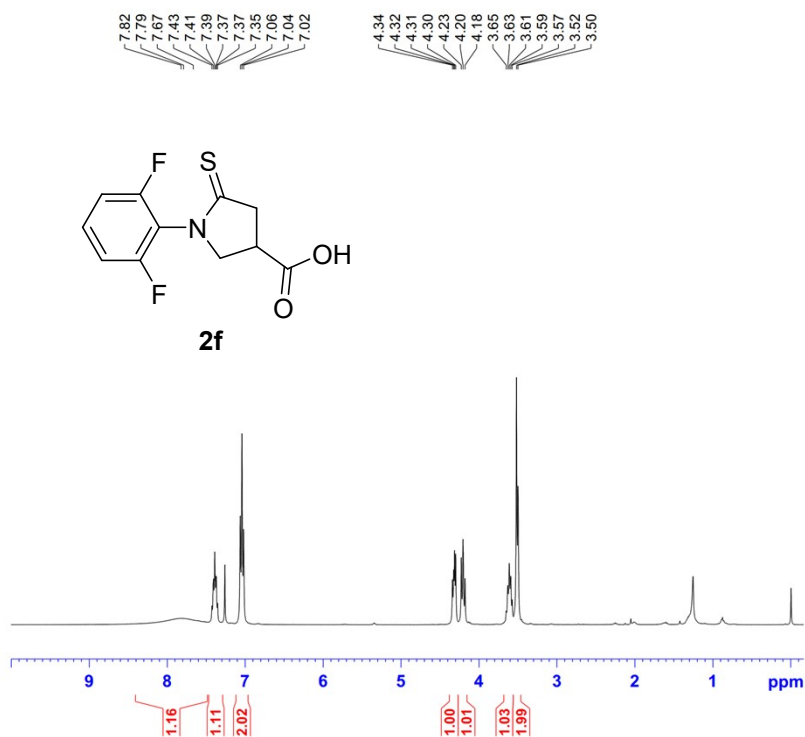

```

NAME      JOCamideine 2ba
EXPNO     1
PROCNO    1
Date_     20160524
Time      10.53
INSTRUM   spect
PROBHD    5 mm PABBO BB-
PULPROG   zg30
TD        65536
SOLVENT   CDCl3
NS        16
DS        2
SWH       8278.146 Hz
FIDRES    0.126314 Hz
AQ        3.9584243 sec
RG        161.3
DW        60.400 usec
DE        6.50 usec
TE        300.0 K
D1        1.00000000 sec
TDO       1

```

```

===== CHANNEL f1 =====
NUC1      1H
P1        16.25 usec
PL1       0.00 dB
PL1W      15.07131863 W
SFO1      400.1324710 MHz
SI        32768
SF        400.1300095 MHz
WDW       EM
SSB       0
LB        0.30 Hz
GB        0
PC        1.00

```

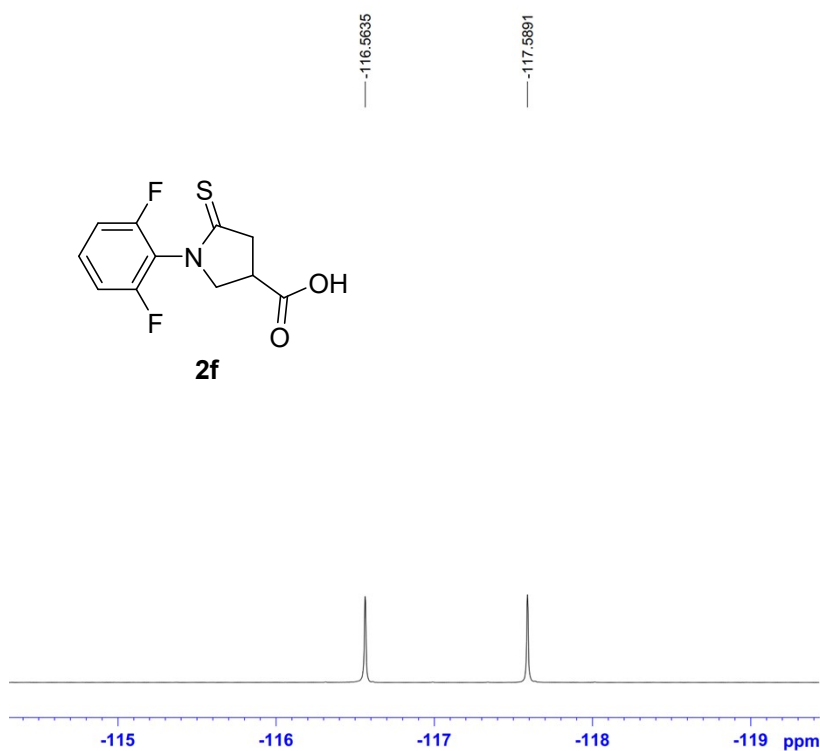

```

NAME      JOCamideine 2ba
EXPNO     7
PROCNO    1
Date_     20160525
Time      11.57
INSTRUM   spect
PROBHD    5 mm PABBO BB-
PULPROG   zgfhlgqr
TD        131072
SOLVENT   CDCl3
NS        32
DS        4
SWH       75187.969 Hz
FIDRES    0.573639 Hz
AQ        0.8716788 sec
RG        4096
DW        6.650 usec
DE        6.50 usec
TE        300.0 K
D1        1.00000000 sec
D11       0.03000000 sec
D12       0.00002000 sec
TDO       1

```

```

===== CHANNEL f1 =====
NUC1      19F
P1        15.00 usec
PL1       3.21 dB
SFO1      376.4682462 MHz

```

```

===== CHANNEL f2 =====
CPDPRG2   waltz16
NUC2      1H
PCPD2     80.00 usec
PL2       0.00 dB
PL12      13.84 dB
PL2W      15.07131863 W
PL12W     0.62251705 W
SFO2      400.1316005 MHz
SI        65536
SF        376.4985555 MHz
WDW       EM
SSB       0
LB        0.30 Hz
GB        0
PC        1.00

```



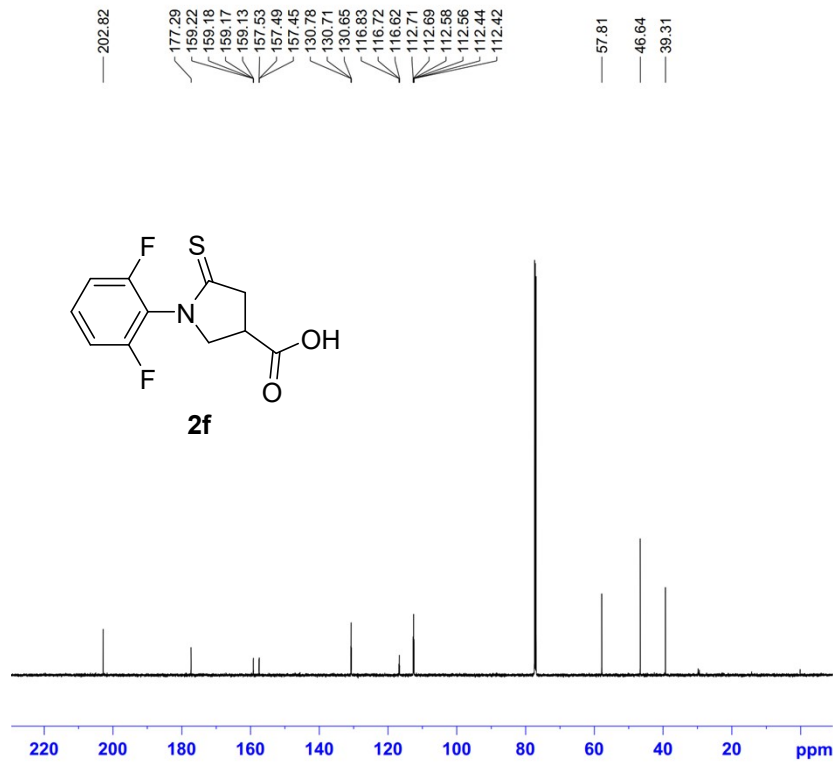

```

NAME      JOCamide 2ba
EXPNO     5
PROCNO    1
Date_     20160524
Time      14.42
INSTRUM   spect
PROBHD    5 mm PABBO BB/
PULPROG   zgpg30
TD         65536
SOLVENT   CDCl3
NS         522
DS         4
SWH        36057.691 Hz
FIDRES     0.550197 Hz
AQ         0.9088159 sec
RG         192.21
DW         13.867 usec
DE         6.50 usec
TE         298.3 K
D1         2.0000000 sec
D11        0.0300000 sec
TDO        1
===== CHANNEL f1 =====
SFO1      150.8892301 MHz
NUC1       13C
P1         11.00 usec
SI         32768
SF         150.8726188 MHz
WDW        EM
SSB        0
LB         1.00 Hz
GB         0
PC         1.40
  
```

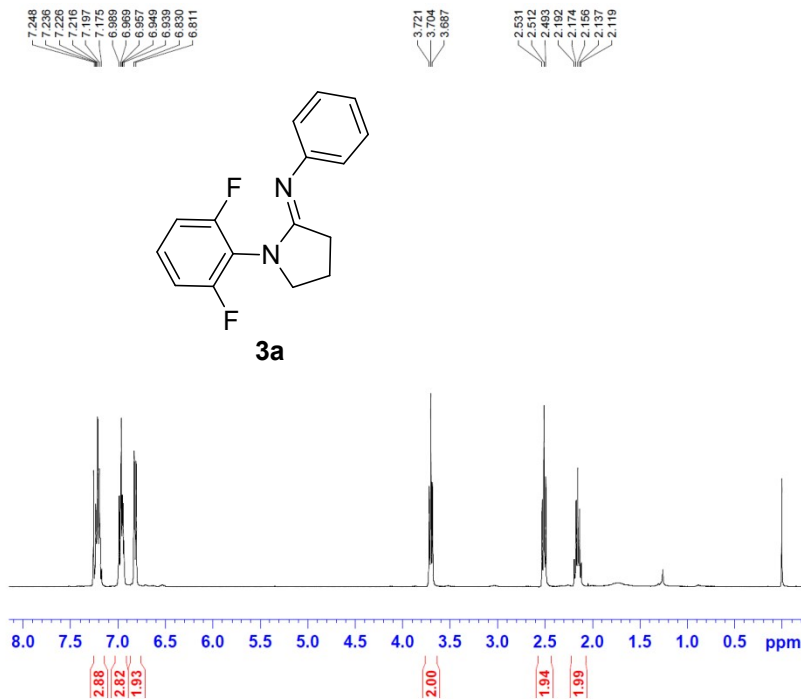

```

NAME      3a
EXPNO     1
PROCNO    1
Date_     20180510
Time      19.30
INSTRUM   spect
PROBHD    5 mm PABBO BB-
PULPROG   zg30
TD         65536
SOLVENT   CDCl3
NS         16
DS         2
SWH        8278.146 Hz
FIDRES     0.126314 Hz
AQ         3.9584243 sec
RG         181
DW         60.400 usec
DE         6.50 usec
TE         300.0 K
D1         1.0000000 sec
TDO        1
===== CHANNEL f1 =====
NUC1       1H
P1         16.50 usec
PL1        0.00 dB
PL1W       15.07131863 W
SFO1      400.1324710 MHz
SI         32768
SF         400.1300092 MHz
WDW        EM
SSB        0
LB         0.30 Hz
GB         0
PC         1.00
  
```

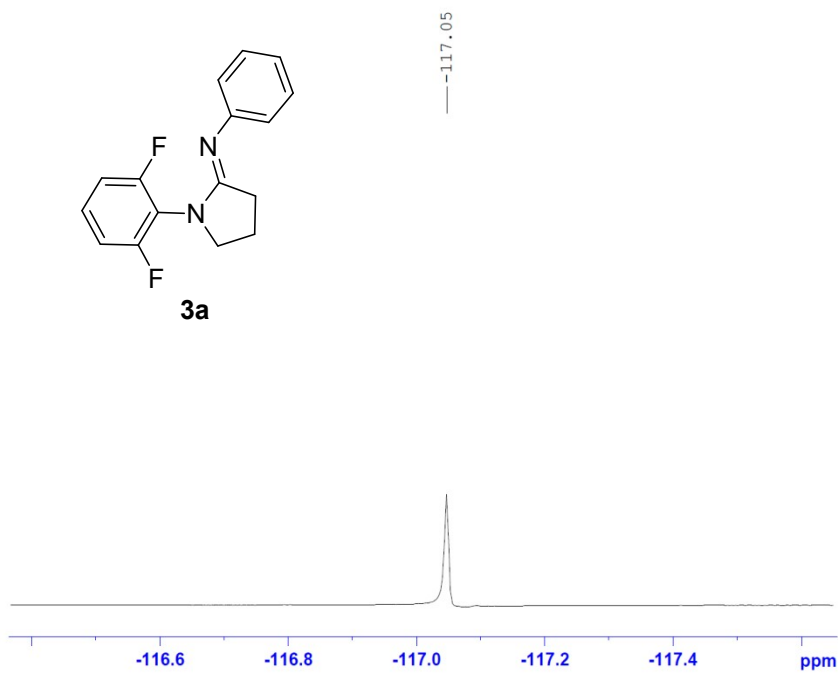

```

NAME          3a
EXPNO         7
PROCNO        1
Date_         20180615
Time         10.03
INSTRUM      spect
PROBHD       5 mm PABBO BB-
PULPROG      zgfhggn
TD           131072
SOLVENT      CDC13
NS           32
DS           4
SWH          75187.969 Hz
FIDRES       0.573639 Hz
AQ           0.8716788 sec
RG           1149.4
DW           6.650 usec
DE           6.50 usec
TE           300.0 K
D1           1.0000000 sec
D11          0.0300000 sec
D12          0.0000200 sec
TD0          1
  
```

```

===== CHANNEL f1 =====
NUC1          19F
P1            15.00 usec
PL1           3.21 dB
SFO1         376.4682462 MHz
  
```

```

===== CHANNEL f2 =====
CPDPRG2      waltz16
NUC2          1H
PCPD2        80.00 usec
PL2           0.00 dB
PL12         13.71 dB
PL2W         15.07131863 W
PL12W        0.64143294 W
SFO2         400.1316005 MHz
SI           65536
SF           376.4985429 MHz
WDW          EM
SSB          0
LB           0.30 Hz
GB           0
PC           1.00
  
```

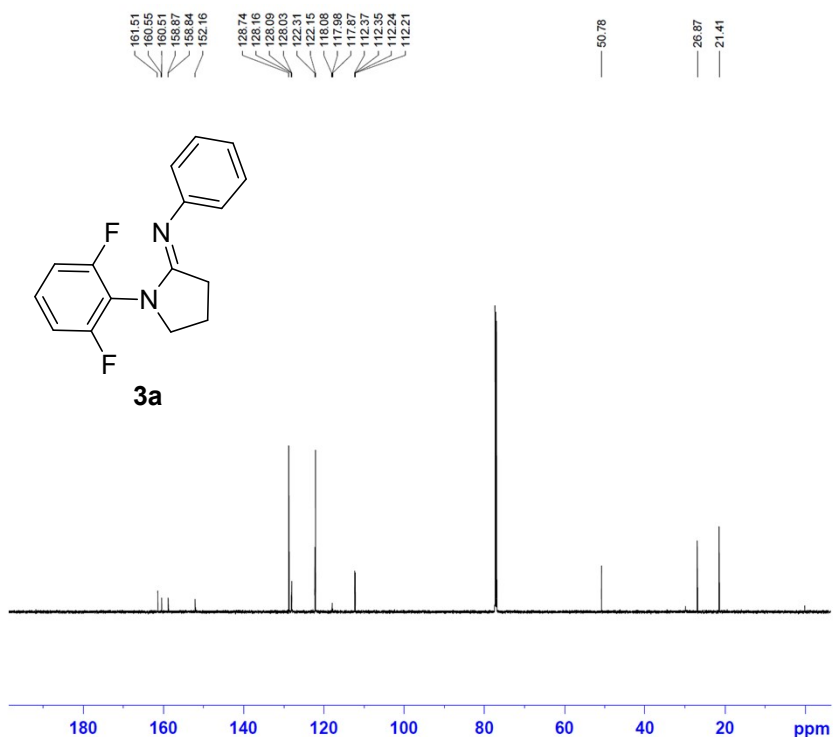

```

NAME          3a
EXPNO         15
PROCNO        1
Date_         20190409
Time         13.32
INSTRUM      spect
PROBHD       5 mm PABBO BB/
PULPROG      zgpg30
TD           65536
SOLVENT      CDC13
NS           541
DS           4
SWH          36057.691 Hz
FIDRES       0.550197 Hz
AQ           0.9088159 sec
RG           192.21
DW           13.867 usec
DE           6.50 usec
TE           298.6 K
D1           2.0000000 sec
D11          0.0300000 sec
TD0          1
  
```

```

===== CHANNEL f1 =====
SFO1         150.8062409 MHz
NUC1          13C
P1            11.00 usec
SI           32768
SF           150.7896377 MHz
WDW          EM
SSB          0
LB           1.00 Hz
GB           0
PC           1.40
  
```

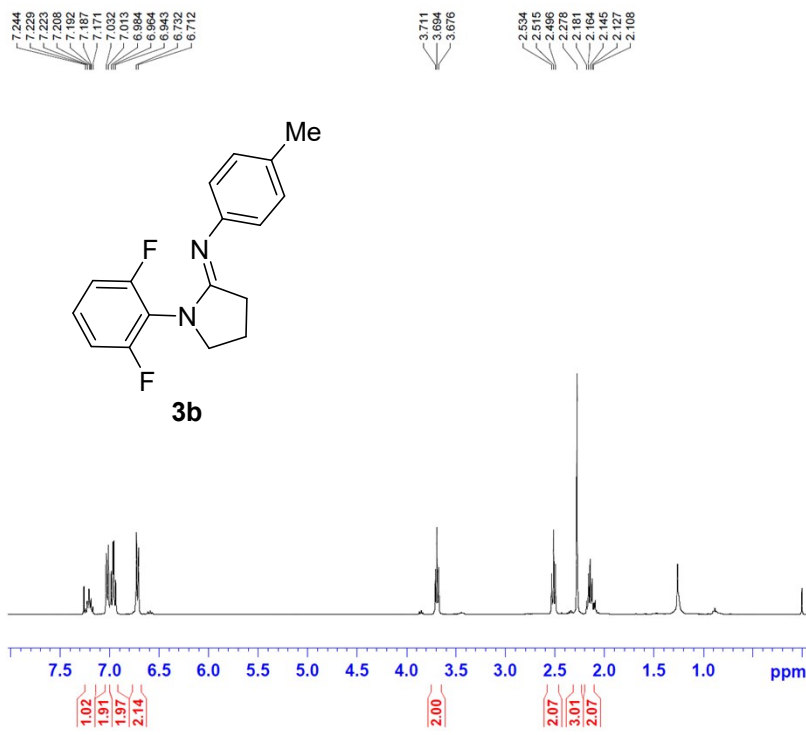

```

NAME          3b
EXPNO         1
PROCNO        1
Date_         20181026
Time          10.01
INSTRUM       spect
PROBHD        5 mm PABBO BB-
PULPROG       zg30
TD            65536
SOLVENT       CDCl3
NS            16
DS            2
SWH           8278.146 Hz
FIDRES        0.126314 Hz
AQ            3.9584243 sec
RG            128
DW            60.400 usec
DE            6.50 usec
TE            300.0 K
D1            1.00000000 sec
D10           1
  
```

```

===== CHANNEL f1 =====
NUC1          1H
P1            16.50 usec
PL1           0.00 dB
PL1W         15.07131863 W
SFO1          400.1324710 MHz
SI            32768
SF            400.1300090 MHz
WFW           EM
SSB           0
LB            0.30 Hz
GB            0
PC            1.00
  
```

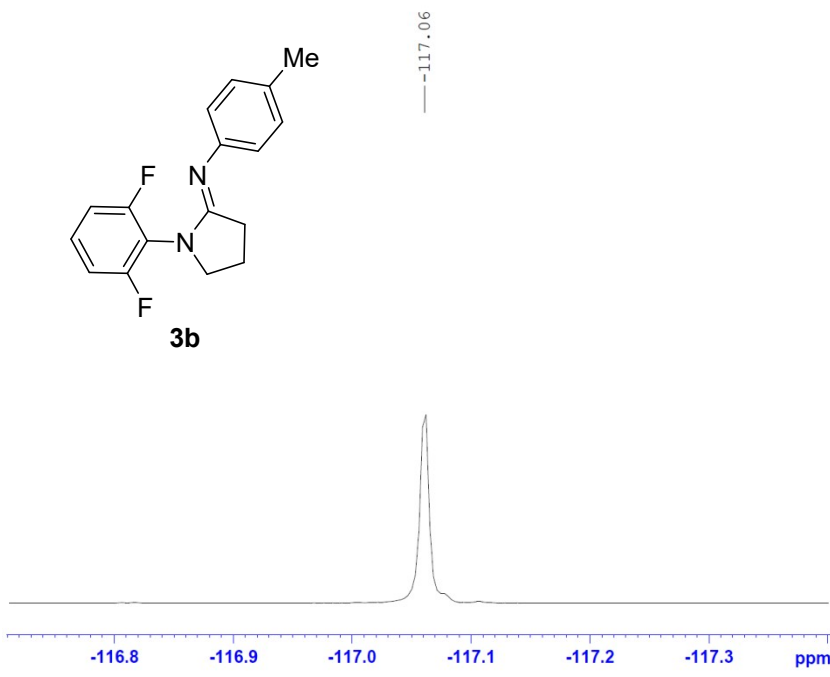

```

NAME          3b
EXPNO         7
PROCNO        1
Date_         20181026
Time          10.04
INSTRUM       spect
PROBHD        5 mm PABBO BB-
PULPROG       zgfhigqn
TD            131072
SOLVENT       CDCl3
NS            32
DS            4
SWH           75187.969 Hz
FIDRES        0.573639 Hz
AQ            0.8716788 sec
RG            4096
DW            6.650 usec
DE            6.50 usec
TE            300.0 K
D1            1.00000000 sec
D11           0.03000000 sec
D12           0.00002000 sec
D10           1
  
```

```

===== CHANNEL f1 =====
NUC1          13C
P1            15.00 usec
PL1           3.21 dB
SFO1          376.4682462 MHz
  
```

```

===== CHANNEL f2 =====
CPDPRG2      waltz16
NUC2          1H
PCPD2        80.00 usec
PL2           0.00 dB
PL12         13.71 dB
PL2W         15.07131863 W
PL12W        0.64143294 W
SFO2          400.1316005 MHz
SI            65536
SF            376.4985635 MHz
WFW           EM
SSB           0
LB            0.30 Hz
GB            0
PC            1.00
  
```

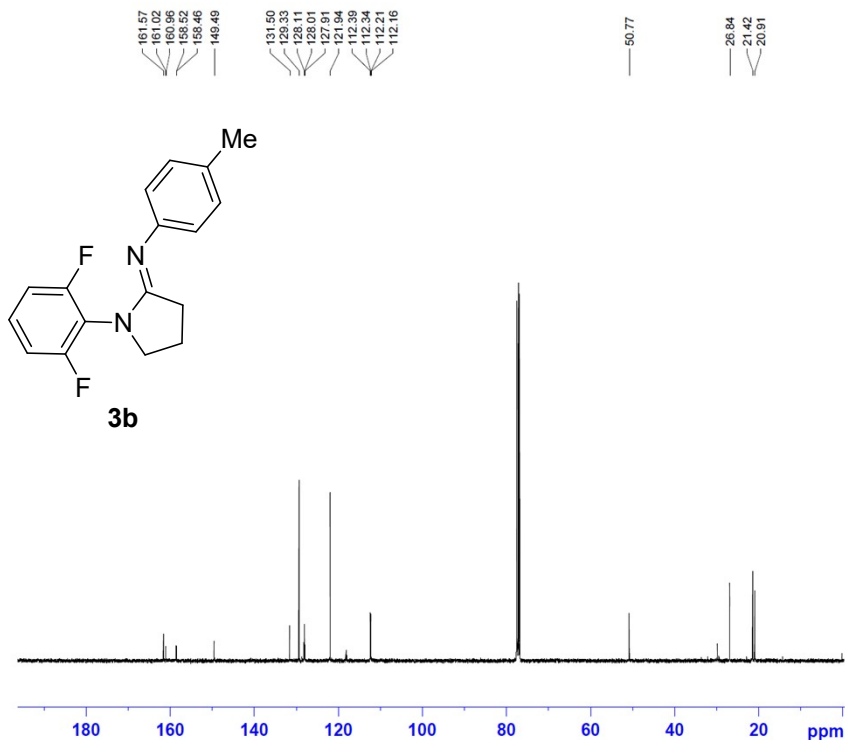

```

NAME          3b
EXPNO         5
PROCNO        1
Date_         20190417
Time_         22.42
INSTRUM       spect
PROBHD        5 mm PABBO BB-
PULPROG       zgpg30
TD            65536
SOLVENT       CDC13
NS            1024
DS            4
SWH           23980.814 Hz
FIDRES        0.365918 Hz
AQ            1.3664756 sec
RG            9195.2
DW            20.850 usec
DE            6.50 usec
TE            300.0 K
D1            2.00000000 sec
D11           0.03000000 sec
TD0           1
  
```

```

===== CHANNEL f1 =====
NUC1          13C
P1            24.00 usec
PL1           -2.00 dB
PL1W          59.71607590 W
SFO1          100.6238364 MHz
  
```

```

===== CHANNEL f2 =====
CPDPRG2       waltz16
NUC2          1H
PCPD2         80.00 usec
PL2           0.00 dB
PL12          13.71 dB
PL13          18.00 dB
PL2W          15.07131863 W
PL12W         0.64143294 W
PL13W         0.23886430 W
SFO2          400.1316005 MHz
SI            32768
SF            100.6127546 MHz
WDW           EM
SSB           0
LB            1.00 Hz
GB            0
PC            1.40
  
```

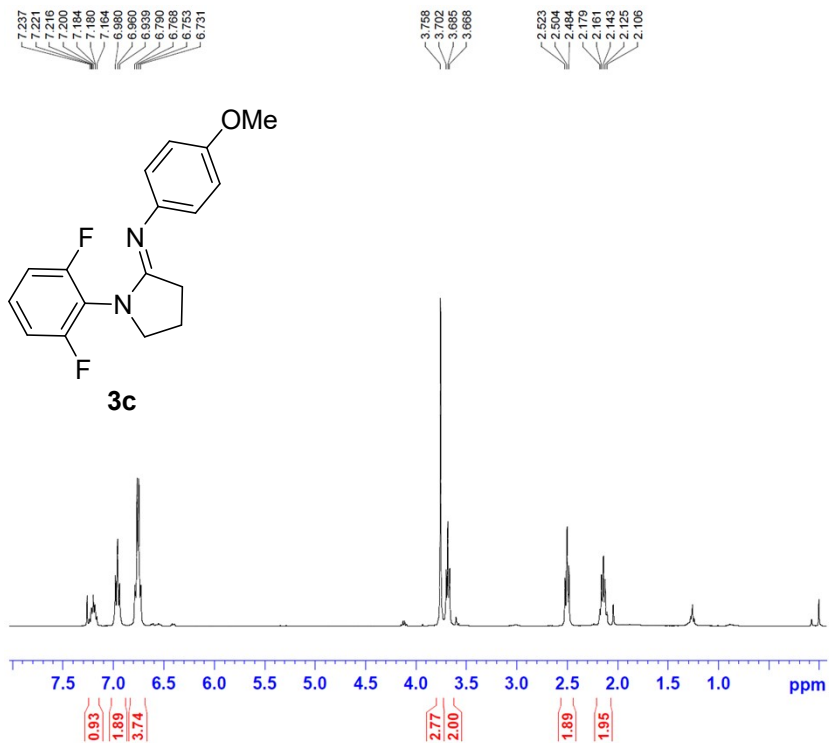

```

NAME          3c
EXPNO         1
PROCNO        1
Date_         20180614
Time_         14.24
INSTRUM       spect
PROBHD        5 mm PABBO BB-
PULPROG       zgpg30
TD            65536
SOLVENT       CDC13
NS            16
DS            2
SWH           8278.146 Hz
FIDRES        0.126314 Hz
AQ            3.9584243 sec
RG            6.28
DW            60.400 usec
DE            6.50 usec
TE            300.0 K
D1            1.00000000 sec
TD0           1
  
```

```

===== CHANNEL f1 =====
NUC1          1H
P1            16.50 usec
PL1           0.00 dB
PL1W          15.07131863 W
SFO1          400.1324710 MHz
SI            32768
SF            400.1300098 MHz
WDW           EM
SSB           0
LB            0.30 Hz
GB            0
PC            1.00
  
```

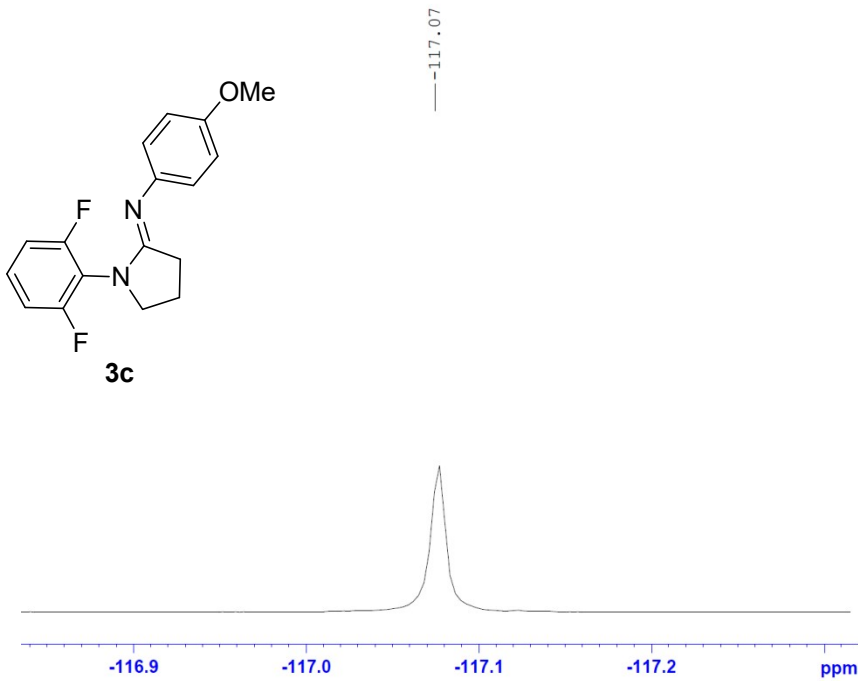

```

===== CHANNEL f1 =====
NUC1      19F
P1        15.00 usec
PL1       3.21 dB
SF01      376.4682462 MHz

===== CHANNEL f2 =====
CPDPRG2   waltz16
NUC2      1H
PCPD2     80.00 usec
PL2       0.00 dB
PL12      13.71 dB
PL2W      15.07131863 W
PL12W     0.64143294 W
SF02      400.1316005 MHz
SI        65536
SF        376.4985612 MHz
WDW       EM
SSB       0
LB        0.30 Hz
GB        0
PC        1.00

```

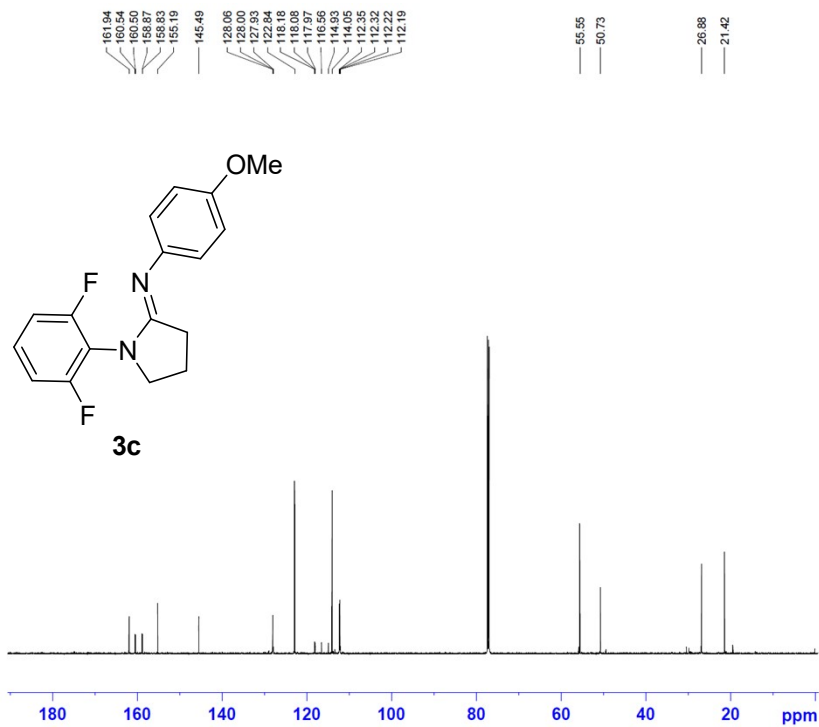

```

===== CHANNEL f1 =====
SF01      150.8062409 MHz
NUC1      13C
P1        11.00 usec
SI        32768
SF        150.7896393 MHz
WDW       EM
SSB       0
LB        1.00 Hz
GB        0
PC        1.40

```

7.471  
7.451  
7.275  
7.250  
7.230  
7.223  
7.218  
7.202  
7.003  
6.983  
6.882  
6.875

3.744  
3.727  
3.710

2.527  
2.508  
2.488  
2.222  
2.184  
2.167  
2.149

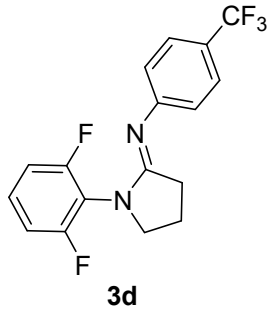

```

NAME          3d
EXPNO         1
PROCNO        1
Date_         20181010
Time         10.53
INSTRUM       spect
PROBHD        5 mm PABBO BB-
PULPROG       zg30
TD            65536
SOLVENT       CDCl3
NS            16
DS            2
SWH           8278.146 Hz
FIDRES        0.126314 Hz
AQ            3.9584243 sec
RG            191
DW            60.400 usec
DE            6.50 usec
TE            300.0 K
D1            1.0000000 sec
D11           1
D12           1
D13           1
D14           1
D15           1
D16           1
D17           1
D18           1
D19           1
D20           1
===== CHANNEL f1 =====
NUC1          1H
P1            16.50 usec
PL1           0.00 dB
PL1W          15.07131863 W
SF01          400.1324710 MHz
SI            32768
SF            400.1300090 MHz
WDW           EM
SSB           0
LB            0.30 Hz
GB            0
PC            1.00
  
```

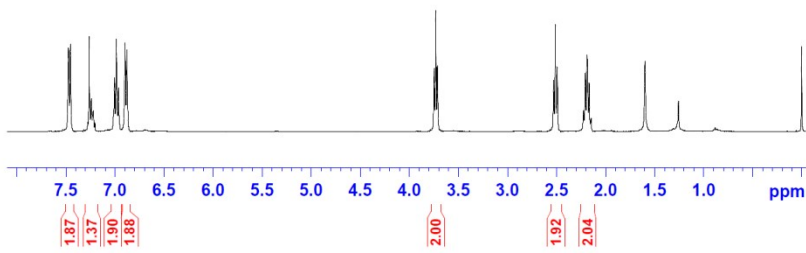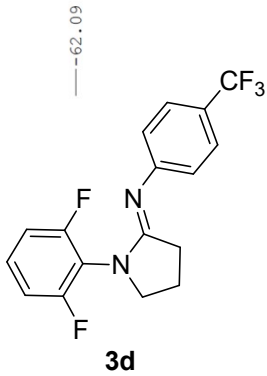

-62.09

-117.18

```

NAME          3d
EXPNO         9
PROCNO        1
Date_         20181011
Time         10.12
INSTRUM       spect
PROBHD        5 mm PABBO BB-
PULPROG       zgfhggn
TD            131072
SOLVENT       CDCl3
NS            32
DS            4
SWH           75187.969 Hz
FIDRES        0.573639 Hz
AQ            0.8716788 sec
RG            4096
DW            6.650 usec
DE            6.50 usec
TE            300.0 K
D1            1.0000000 sec
D11           0.03000000 sec
D12           0.00002000 sec
D13           1
D14           1
D15           1
D16           1
D17           1
D18           1
D19           1
D20           1
===== CHANNEL f1 =====
NUC1          19F
P1            15.00 usec
PL1           3.21 dB
SF01          376.4682462 MHz
===== CHANNEL f2 =====
CPDPRG2       waltz16
NUC2          1H
ECPD2         80.00 usec
PL2           0.00 dB
PL12          13.71 dB
PL2W          15.07131863 W
PL12W         0.64143294 W
SF02          400.1316005 MHz
SI            65536
SF            376.4985590 MHz
WDW           EM
SSB           0
LB            0.30 Hz
GB            0
PC            1.00
  
```

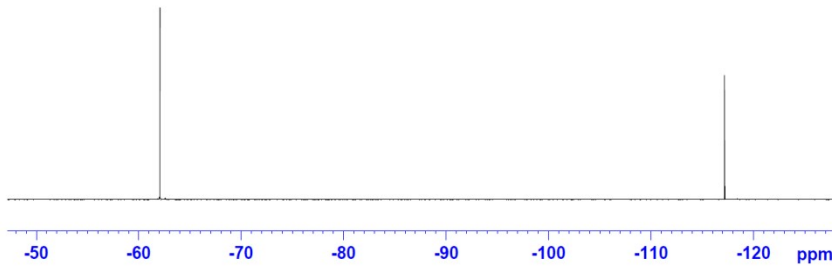

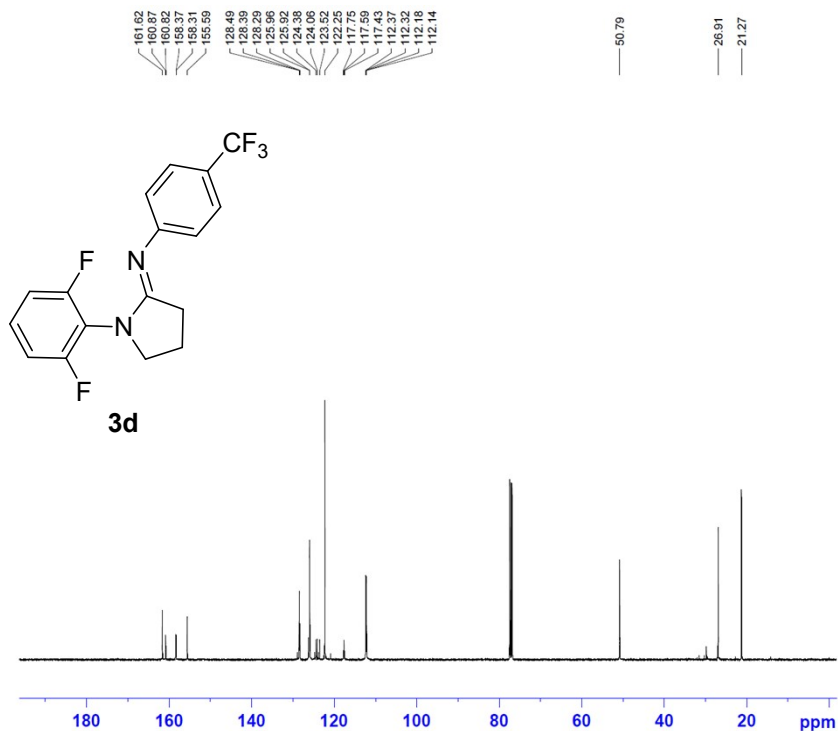

```

NAME          3d
EXPNO         5
PROCNO        1
Date_         20190418
Time          0.51
INSTRUM       spect
PROBHD        5 mm PABBO BB-
PULPROG       zgpg30
TD            65536
SOLVENT       CDCl3
NS            1024
DS            4
SWH           23900.814 Hz
FIDRES        0.365918 Hz
AQ            1.3664756 sec
RG            9195.2
DW            20.850 usec
DE            6.50 usec
TE            300.0 K
D1            2.00000000 sec
D11           0.03000000 sec
TD0           1
  
```

```

===== CHANNEL f1 =====
NUC1          13C
P1            24.00 usec
PL1           -2.00 dB
PL1W          59.71607590 W
SF01          100.6238364 MHz
  
```

```

===== CHANNEL f2 =====
CPDPRG2       waltz16
NUC2          1H
PCPD2         80.00 usec
PL2           0.00 dB
PL12          13.71 dB
PL13          18.00 dB
PL2W          15.07131863 W
PL12W         0.64143294 W
PL13W         0.23886430 W
SF02          400.1316005 MHz
SI            32768
SF            100.6127590 MHz
WDW           EM
SSB           0
LB            1.00 Hz
GB            0
PC            1.40
  
```

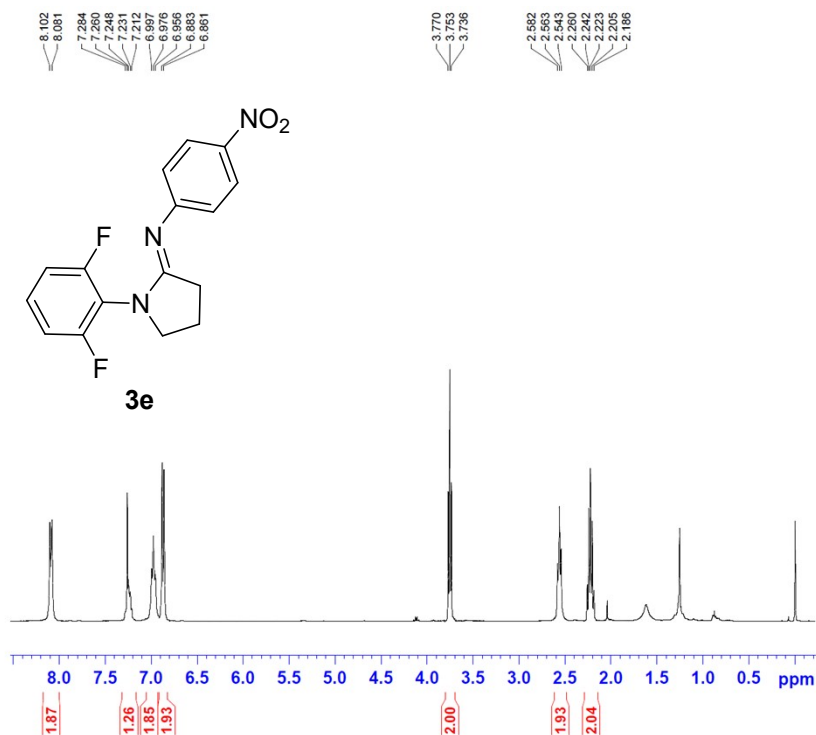

```

NAME          3e
EXPNO         1
PROCNO        1
Date_         20180712
Time          15.46
INSTRUM       spect
PROBHD        5 mm PABBO BB-
PULPROG       zg30
TD            65536
SOLVENT       CDCl3
NS            16
DS            2
SWH           8278.146 Hz
FIDRES        0.126314 Hz
AQ            3.9584243 sec
RG            181
DW            60.400 usec
DE            6.50 usec
TE            300.0 K
D1            1.00000000 sec
TD0           1
  
```

```

===== CHANNEL f1 =====
NUC1          1H
P1            16.50 usec
PL1           0.00 dB
PL1W          15.07131863 W
SF01          400.1324710 MHz
SI            32768
SF            400.1300090 MHz
WDW           EM
SSB           0
LB            0.30 Hz
GB            0
PC            1.00
  
```

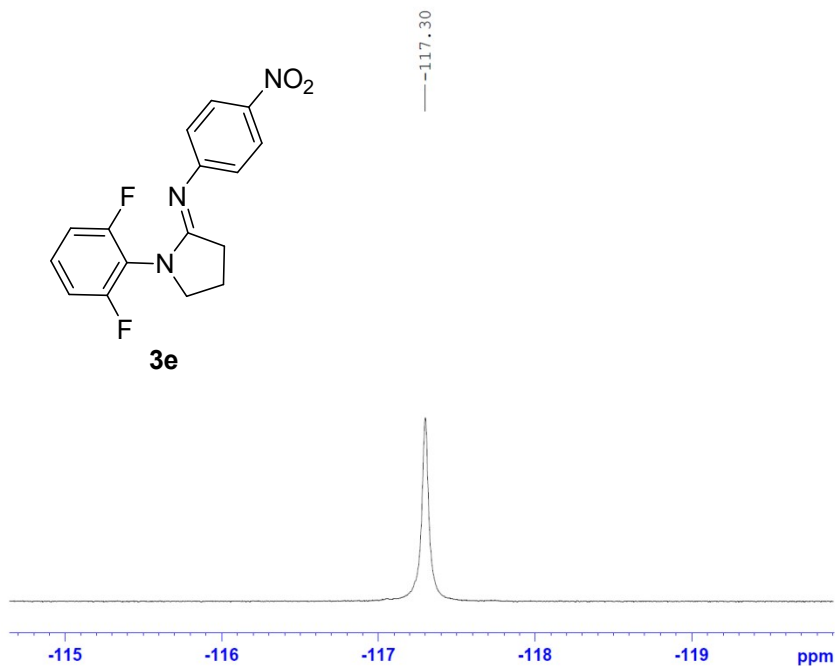

```

NAME          3e
EXPNO         7
PROCNO        1
Date_         20180712
Time          15.49
INSTRUM       spect
FROBHD        5 mm PABBO BB-
PULPROG       zgpg30
TD            131072
SOLVENT       CDCl3
NS            32
DS            4
SWH           75187.969 Hz
FIDRES        0.573639 Hz
AQ            0.8716788 sec
RG            4096
DW            6.650 usec
DE            6.50 usec
TE            300.0 K
D1            1.00000000 sec
D11           0.03000000 sec
D12           0.00002000 sec
TD0           1

```

```

===== CHANNEL f1 =====
NUC1          19F
P1            15.00 usec
PL1           3.21 dB
SFO1         376.4682462 MHz

===== CHANNEL f2 =====
CPDPRG2      waltz16
NUC2          1H
PCPD2        80.00 usec
PL2           0.00 dB
PL12         13.71 dB
PL2W         15.07131863 W
PL12W        0.64143294 W
SFO2         400.1316005 MHz
SI           65536
SF           376.4985601 MHz
WDW           EM
SSB           0
LB            0.30 Hz
GB            0
PC            1.00

```

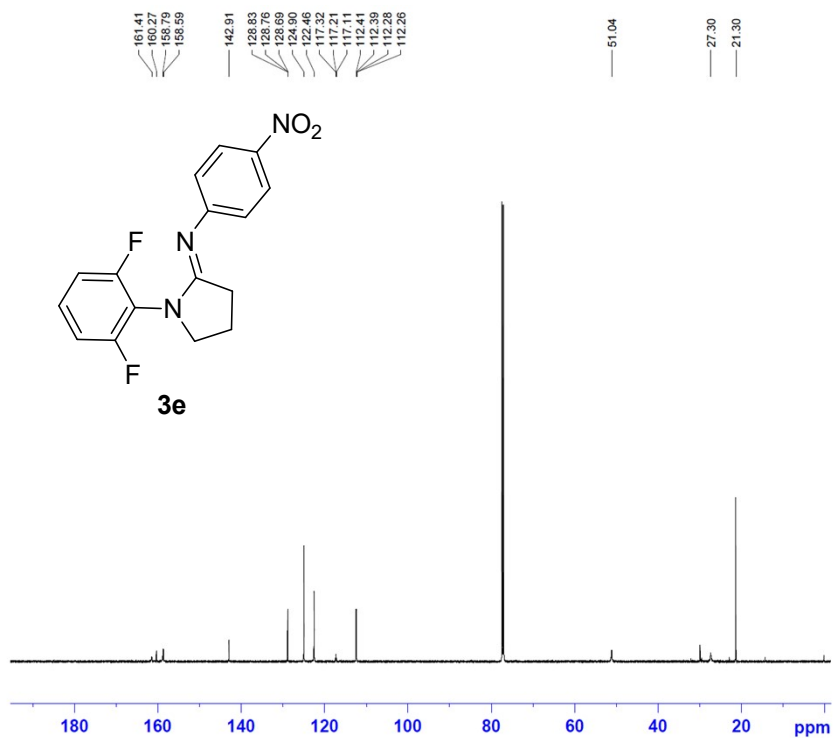

```

NAME          3e
EXPNO         15
PROCNO        1
Date_         20190410
Time          11.51
INSTRUM       spect
FROBHD        5 mm PABBO BB-
PULPROG       zgpg30
TD            65536
SOLVENT       CDCl3
NS            2048
DS            4
SWH           36057.691 Hz
FIDRES        0.550197 Hz
AQ            0.9088159 sec
RG            192.21
DW            13.867 usec
DE            6.50 usec
TE            299.3 K
D1            2.00000000 sec
D11           0.03000000 sec
TD0           1

```

```

===== CHANNEL f1 =====
SFO1         150.8062409 MHz
NUC1          13C
P1            11.00 usec
SI           32768
SF           150.7896382 MHz
WDW           EM
SSB           0
LB            1.00 Hz
GB            0
PC            1.40

```



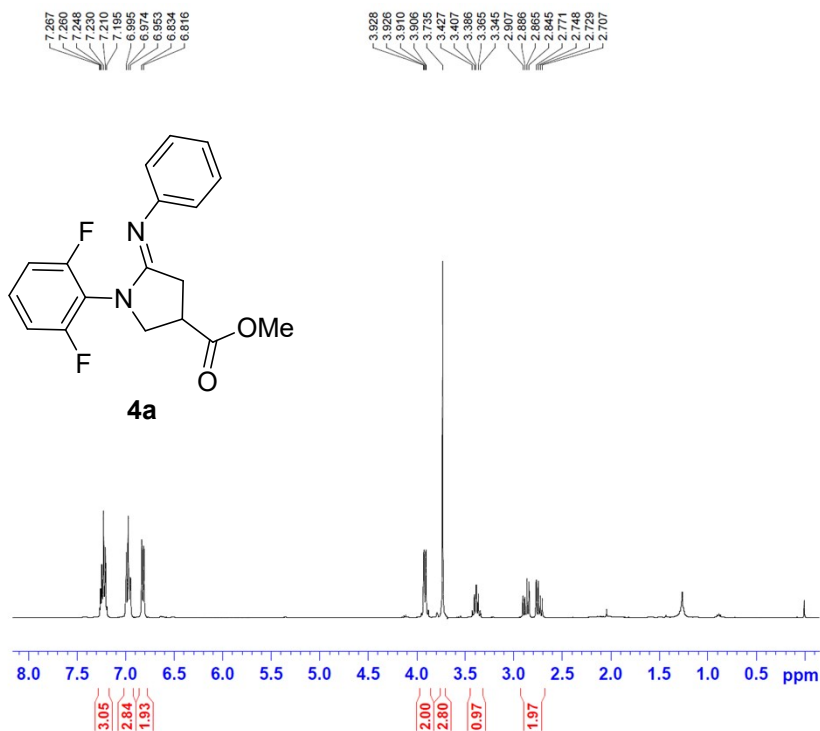

```

NAME          4a
EXPNO         1
PROCNO        1
Date_         20160513
Time_         11.16
INSTRUM       spect
PROBHD        5 mm FABBO BB-
PULPROG       zg30
TD            65536
SOLVENT       CDCl3
NS            16
DS            0
SWH           8278.146 Hz
FIDRES        0.126314 Hz
AQ            3.9584243 sec
RG            90.5
DW            60.400 usec
DE            6.50 usec
TE            300.0 K
D1            1.00000000 sec
TD0           1
===== CHANNEL f1 =====
NUC1          1H
P1            16.25 usec
PL1           0.00 dB
PL1W          15.07131863 W
SFO1          400.1324710 MHz
SI            32768
SF            400.1300094 MHz
WDW           EM
SSB           0
LB            0.30 Hz
GB            0
PC            1.00

```

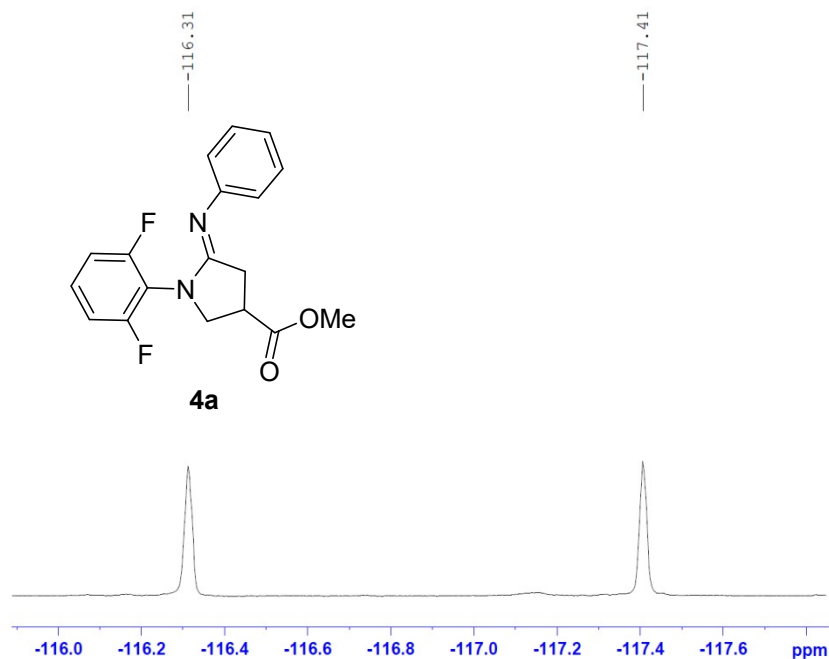

```

NAME          4a
EXPNO         17
PROCNO        1
Date_         20181030
Time_         16.13
INSTRUM       spect
PROBHD        5 mm FABBO BB-
PULPROG       zgfhigqn
TD            524288
SOLVENT       CDCl3
NS            32
DS            4
SWH           75187.969 Hz
FIDRES        0.143410 Hz
AQ            3.4865651 sec
RG            4096
DW            6.650 usec
DE            6.50 usec
TE            300.0 K
D1            1.00000000 sec
D11           0.03000000 sec
D12           0.00002000 sec
TD0           1
===== CHANNEL f1 =====
NUC1          19F
P1            15.00 usec
PL1           3.21 dB
SFO1          376.4682462 MHz
===== CHANNEL f2 =====
CPDPRG2       waltz16
NUC2          1H
PCPD2         90.00 usec
PL2           0.00 dB
PL12          13.71 dB
PL2W          15.07131863 W
PL12W         0.64143294 W
SFO2          400.1316005 MHz
SI            65536
SF            376.4985647 MHz
WDW           EM
SSB           0
LB            0.30 Hz
GB            0
PC            1.00

```

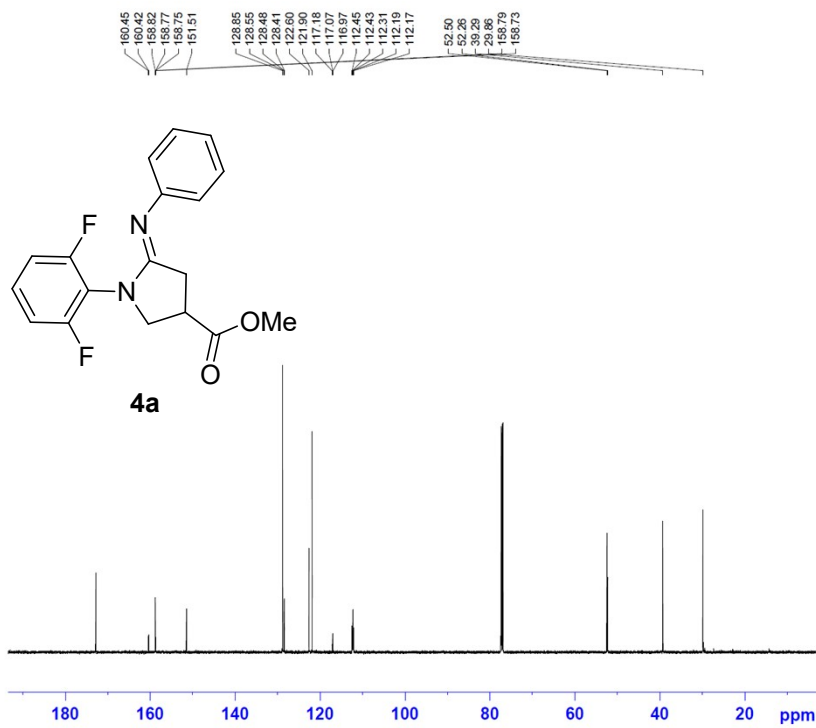

```

NAME          4a
EXPNO         5
PROCNO        1
Date_         20160516
Time_         11.29
INSTRUM       spect
PROBHD        5 mm PABBO BB/
PULPROG       zgpg30
TD            65536
SOLVENT       CDCl3
NS            290
DS            4
SWH           36057.691 Hz
FIDRES        0.550197 Hz
AQ            0.9088159 sec
RG            192.21
LW            13.867 usec
DE            6.50 usec
TE            298.2 K
D1            2.00000000 sec
D11           0.03000000 sec
TD0           1
  
```

```

===== CHANNEL f1 =====
SFO1          150.8892301 MHz
NUC1          13C
P1            11.00 usec
SI            32768
SF            150.8726216 MHz
WDW           EM
SSB           0
LB            1.00 Hz
GB            0
PC            1.40
  
```

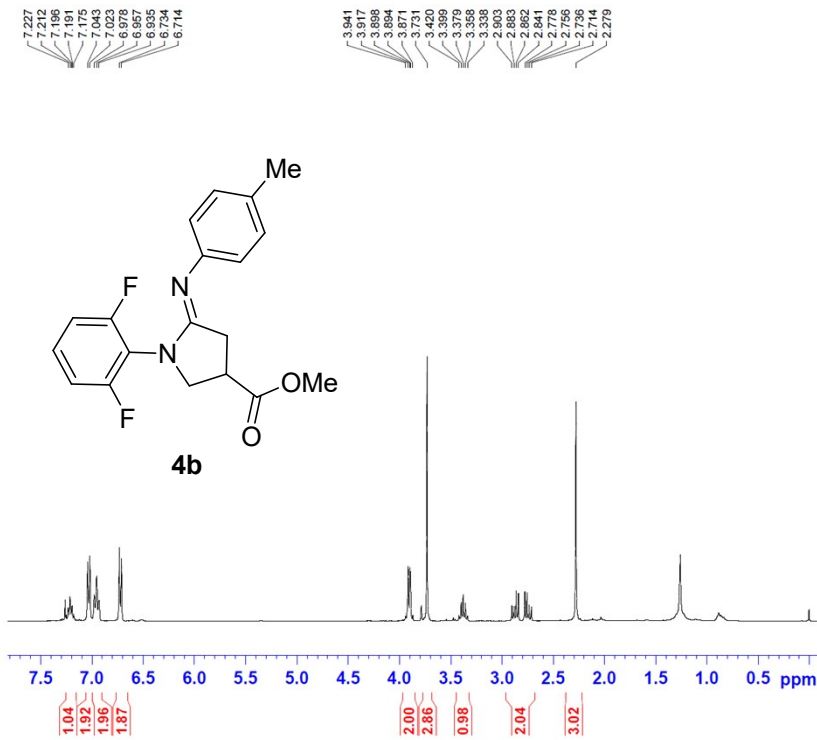

```

NAME          4b
EXPNO         1
PROCNO        1
Date_         20181015
Time_         16.02
INSTRUM       spect
PROBHD        5 mm PABBO BB-
PULPROG       zg30
TD            65536
SOLVENT       CDCl3
NS            16
DS            2
SWH           8278.146 Hz
FIDRES        0.126314 Hz
AQ            3.9584243 sec
RG            90.5
LW            60.400 usec
DE            6.50 usec
TE            300.0 K
D1            1.00000000 sec
TD0           1
  
```

```

===== CHANNEL f1 =====
NUC1          1H
P1            16.50 usec
PL1           0.00 dB
PL1W          15.07131863 W
SFO1          400.1324710 MHz
SI            32768
SF            400.1300089 MHz
WDW           EM
SSB           0
LB            0.30 Hz
GB            0
PC            1.00
  
```

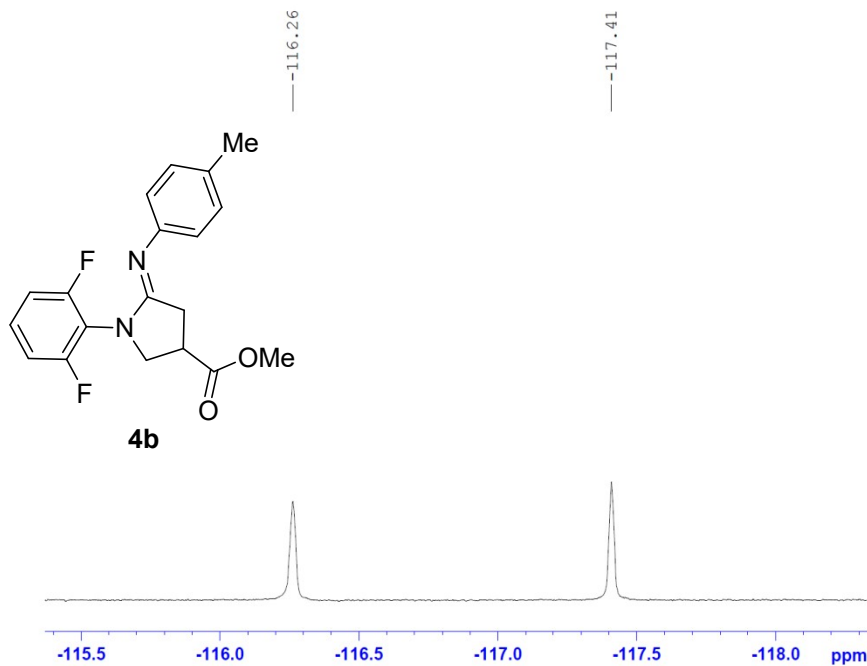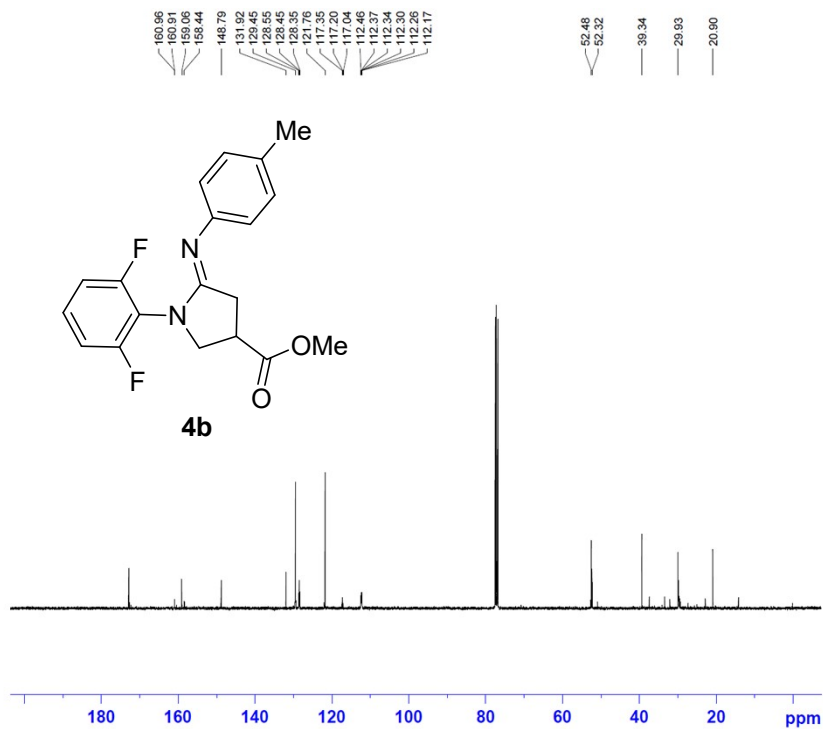

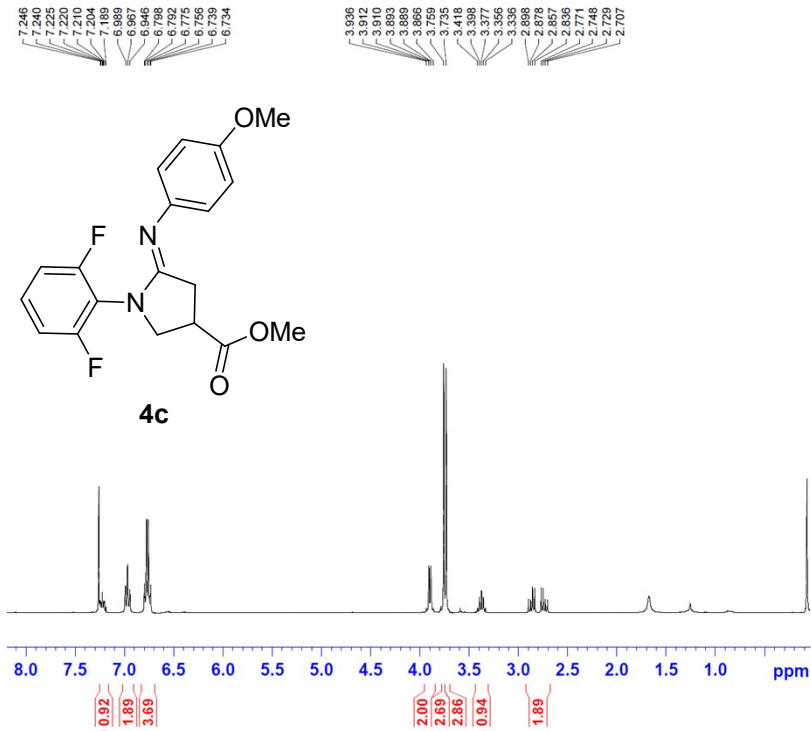

```

NAME          4c
EXPNO         1
PROCNO        1
Date_         20180327
Time          11.49
INSTRUM       spect
PROBHD        5 mm PABBO BB-
PULPROG       zg30
TD            65536
SOLVENT       CDCl3
NS            16
DS            2
SWH           8278.146 Hz
FIDRES        0.126314 Hz
AQ            3.9584243 sec
RG            161.3
DW            60.400 usec
DE            6.50 usec
TE            300.0 K
D1            1.00000000 sec
TD0           1

===== CHANNEL f1 =====
NUC1          1H
P1            16.50 usec
PL1           0.00 dB
PL1W          15.07131863 W
SFO1          400.1324710 MHz
SI            32768
SF            400.1300090 MHz
WDW           EM
SSB           0
LB            0.30 Hz
GB            0
PC            1.00

```

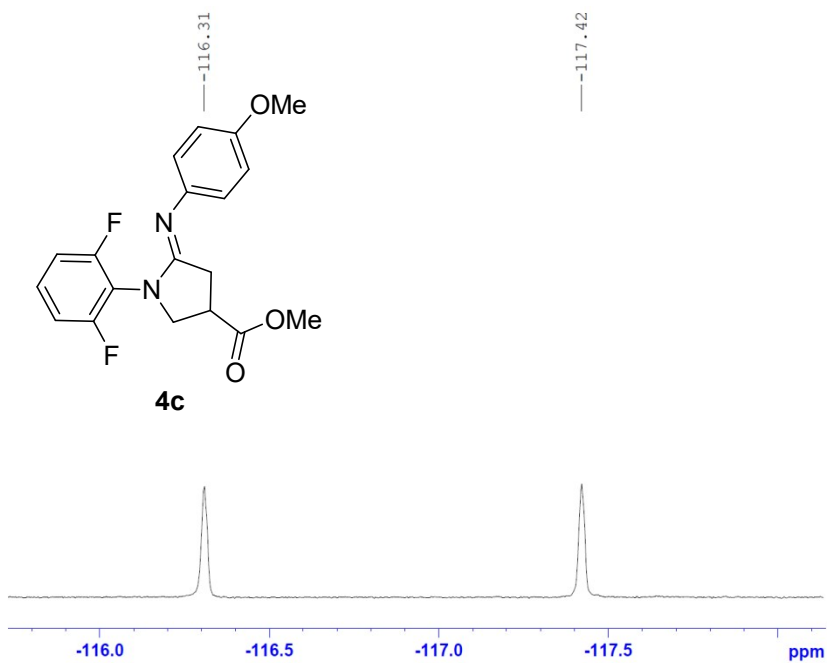

```

NAME          4c
EXPNO         7
PROCNO        1
Date_         20181102
Time          10.44
INSTRUM       spect
PROBHD        5 mm PABBO BB-
PULPROG       zgfg30gr
TD            524288
SOLVENT       CDCl3
NS            32
DS            4
SWH           75187.969 Hz
FIDRES        0.143410 Hz
AQ            3.4865651 sec
RG            7298.2
DW            6.650 usec
DE            6.50 usec
TE            300.0 K
D1            1.00000000 sec
D11           0.03000000 sec
D12           0.00002000 sec
TD0           1

===== CHANNEL f1 =====
NUC1          13C
P1            19F
PL1           15.00 usec
PL1           3.21 dB
SFO1          376.4682462 MHz

===== CHANNEL f2 =====
CPDPRG2       waltz16
NUC2          1H
PCPD2         80.00 usec
PL2           0.00 dB
PL12          13.71 dB
PL2W          15.07131863 W
PL12W         0.64143294 W
SFO2          400.1316005 MHz
SI            65536
SF            376.4985612 MHz
WFW           EM
SSB           0
LB            0.30 Hz
GB            0
PC            1.00

```

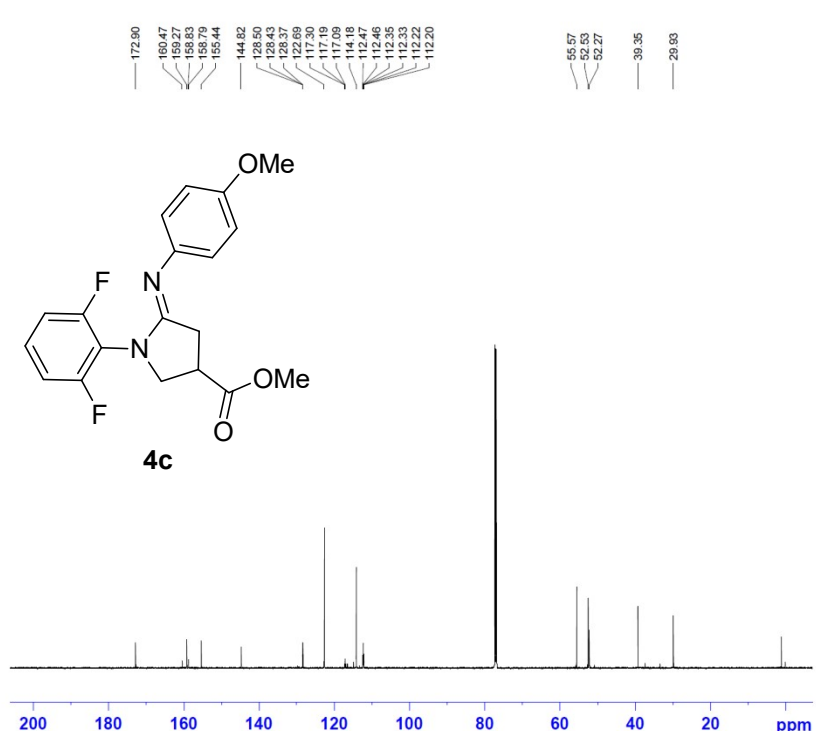

```

NAME          4c
EXPNO         15
PROCNO        1
Date_         20190409
Time_         11.55
INSTRUM       spect
PROBHD        5 mm PABBO BB/
PULPROG       zgpg30
TD            65536
FIDRES        0.9088159 Hz
AQ            0.0000000 sec
RG            192.21
SW            13.867 usec
DE            6.50 usec
TE            298.6 K
D1            2.0000000 sec
D11           0.0300000 sec
TDO           1

```

```

===== CHANNEL f1 =====
SF01         150.8062409 MHz
NUC1         13C
P1           11.00 usec
SI           32768
SF           150.7896372 MHz
WDW          EM
SSB          0
LB           1.00 Hz
GB           0
PC           1.40

```

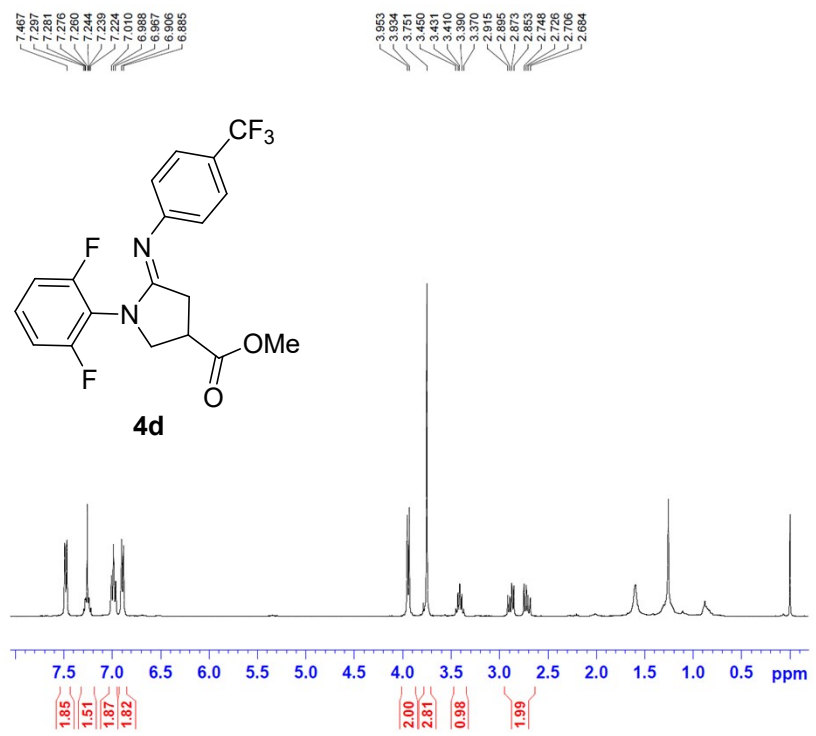

```

NAME          4d
EXPNO         1
PROCNO        1
Date_         20181029
Time_         17.06
INSTRUM       spect
PROBHD        5 mm PABBO BB-
PULPROG       zg30
TD            65536
SOLVENT       CDCl3
NS            16
DS            2
SWH           8278.146 Hz
FIDRES        0.126314 Hz
AQ            3.9584243 sec
RG            181
DW            60.400 usec
DE            6.50 usec
TE            300.0 K
D1            1.0000000 sec
TDO           1

```

```

===== CHANNEL f1 =====
NUC1          1H
P1            16.50 usec
PL1           0.00 dB
PL1W          15.07131863 W
SF01          400.1324710 MHz
SI            32768
SF            400.1300091 MHz
WDW           EM
SSB           0
LB            0.30 Hz
GB            0
PC            1.00

```

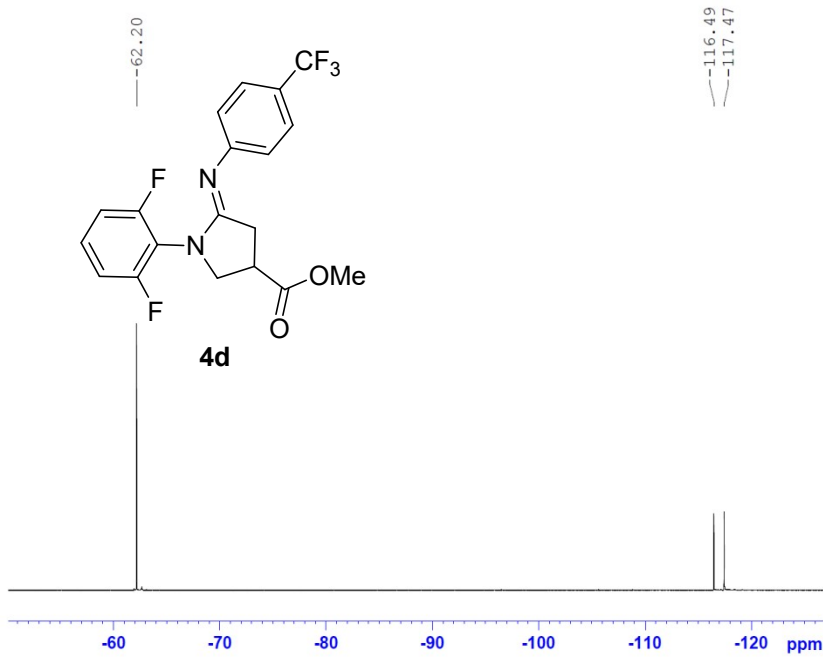

```

NAME          4d
EXPNO         7
PROCNO        1
Date_         20181029
Time          17.11
INSTRUM       spect
PROBHD        5 mm PABBO BB-
PULPROG       zgfhiggn
TD            524288
SOLVENT       CDCl3
NS            32
DS            4
SWH           75187.969 Hz
FIDRES        0.143410 Hz
AQ            3.4865651 sec
RG            4096
DW            6.650 usec
DE            6.50 usec
TE            300.0 K
D1            1.00000000 sec
D11           0.03000000 sec
D12           0.00002000 sec
TD0           1

===== CHANNEL f1 =====
NUC1          19F
P1            15.00 usec
PL1           3.21 dB
SF01         376.4682462 MHz

===== CHANNEL f2 =====
CPDPRG2      waltz16
NUC2          1H
PCPD2        80.00 usec
PL2           0.00 dB
PL12         13.71 dB
PL2W         15.07131863 W
PL12W        0.64143294 W
SF02         400.1316005 MHz
SI           65536
SF           376.4985612 MHz
WDW           EM
SSB           0
LB            0.30 Hz
GB            0
PC            1.00

```

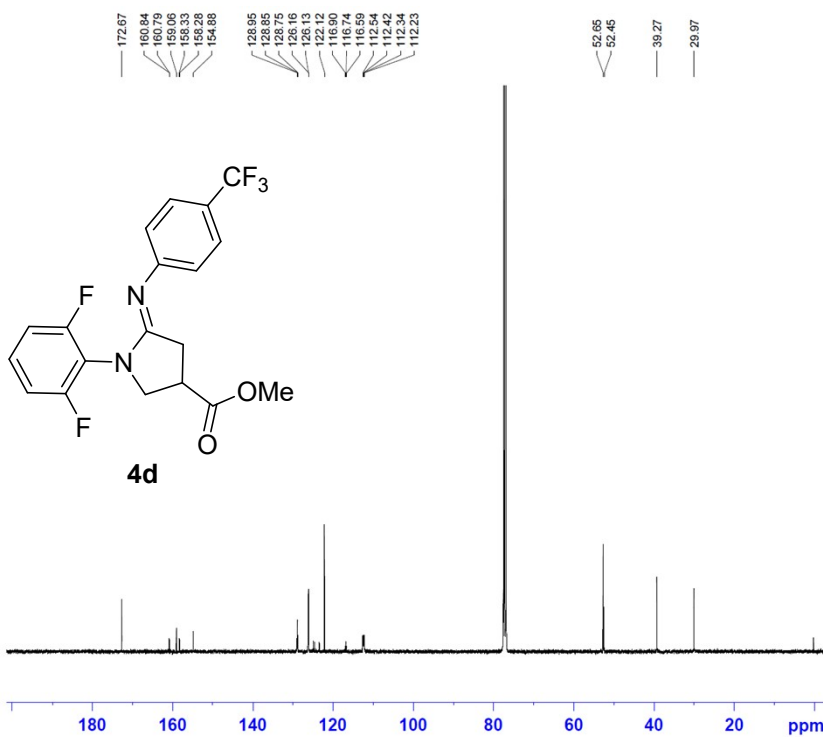

```

NAME          4d
EXPNO         5
PROCNO        1
Date_         20190414
Time          12.17
INSTRUM       spect
PROBHD        5 mm PABBO BB-
PULPROG       zgpg30
TD            65536
SOLVENT       CDCl3
NS            5120
DS            4
SWH           23980.814 Hz
FIDRES        0.365918 Hz
AQ            1.3664756 sec
RG            14596.5
DW            20.850 usec
DE            6.50 usec
TE            300.0 K
D1            2.00000000 sec
D11           0.03000000 sec
TD0           1

===== CHANNEL f1 =====
NUC1          13C
P1            24.00 usec
PL1           -2.00 dB
PL1W         59.71607590 W
SF01         100.6238364 MHz

===== CHANNEL f2 =====
CPDPRG2      waltz16
NUC2          1H
PCPD2        80.00 usec
PL2           0.00 dB
PL12         13.71 dB
PL13         18.00 dB
PL2W         15.07131863 W
PL12W        0.64143294 W
PL13W        0.23886430 W
SF02         400.1316005 MHz
SI           32768
SF           100.6127532 MHz
WDW           EM
SSB           0
LB            1.00 Hz
GB            0
PC            1.40

```

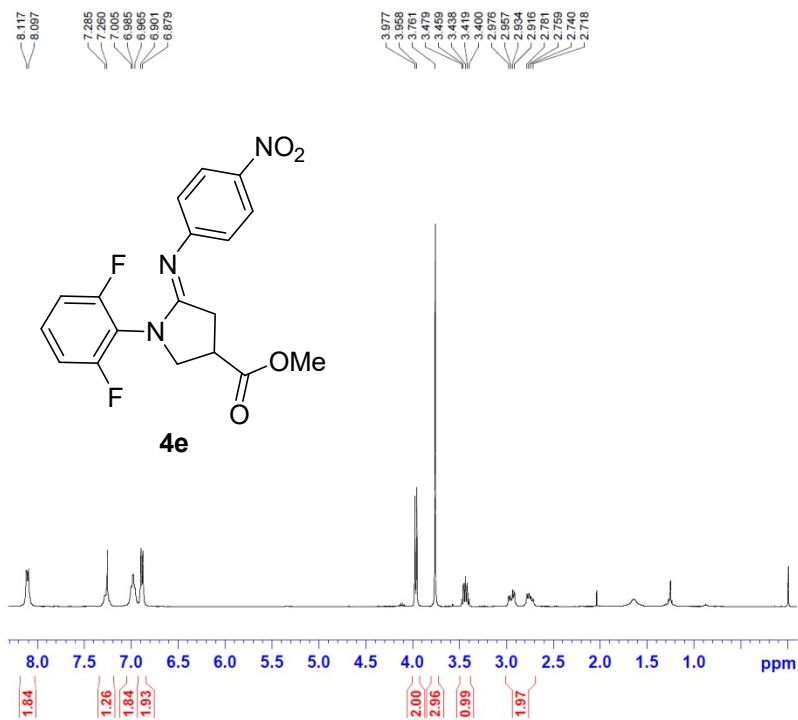

```

NAME          4e
EXPNO         1
PROCNO        1
Date_         20180712
Time          15.55
INSTRUM       spect
PROBHD        5 mm FAPBO BB-
PULPROG       zg30
TD            65536
SOLVENT       CDCl3
NS            16
DS            2
SWH           8278.146 Hz
FIDRES        0.126314 Hz
AQ           3.9584243 sec
RG            161.3
DW           60.400 usec
DE           6.50 usec
TE            300.0 K
D1            1.00000000 sec
TD0           1

===== CHANNEL f1 =====
NUC1           1H
P1            16.50 usec
PL1           0.00 dB
PL1W          15.07131863 W
SFO1          400.1324710 MHz
SI            32768
SF            400.1300090 MHz
WDW           EM
SSB           0
LB            0.30 Hz
GB            0
PC            1.00

```

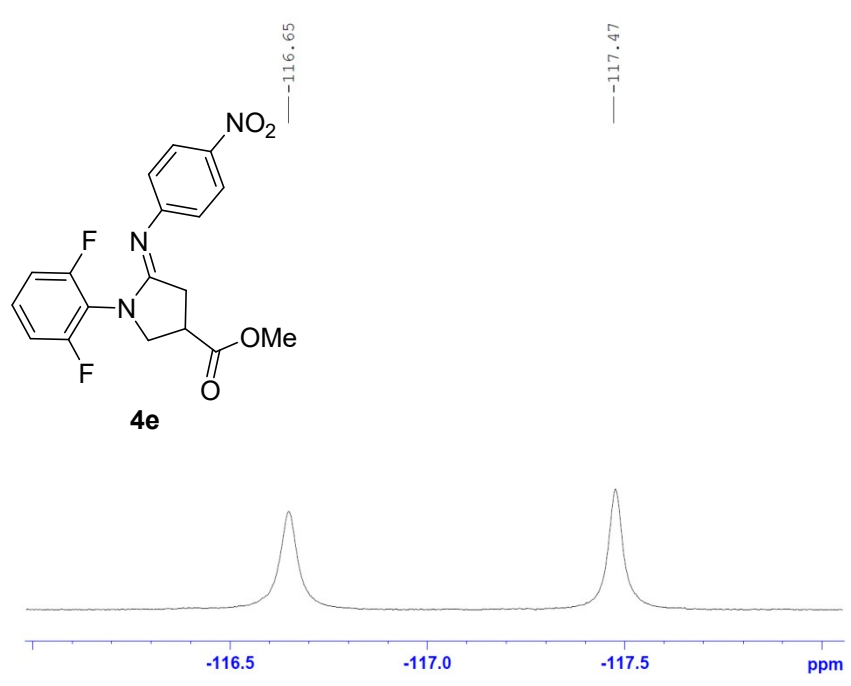

```

NAME          4e
EXPNO         7
PROCNO        1
Date_         20180712
Time          15.59
INSTRUM       spect
PROBHD        5 mm FAPBO BB-
PULPROG       zgfhigqn
TD            131072
SOLVENT       CDCl3
NS            32
DS            4
SWH           75187.969 Hz
FIDRES        0.573639 Hz
AQ           0.8716788 sec
RG            4096
DW           6.650 usec
DE           6.50 usec
TE            300.0 K
D1            1.00000000 sec
D11           0.03000000 sec
D12           0.00002000 sec
TD0           1

===== CHANNEL f1 =====
NUC1           13C
P1            15.00 usec
PL1           3.21 dB
SFO1          376.4682462 MHz

===== CHANNEL f2 =====
CPDPRG2       waltz16
NUC2           1H
PCPD2         80.00 usec
PL2           0.00 dB
PL12          13.71 dB
PL2W          15.07131863 W
PL12W         0.64143294 W
SFO2          400.1316005 MHz
SI            65536
SF            376.4985567 MHz
WDW           EM
SSB           0
LB            0.30 Hz
GB            0
PC            1.00

```

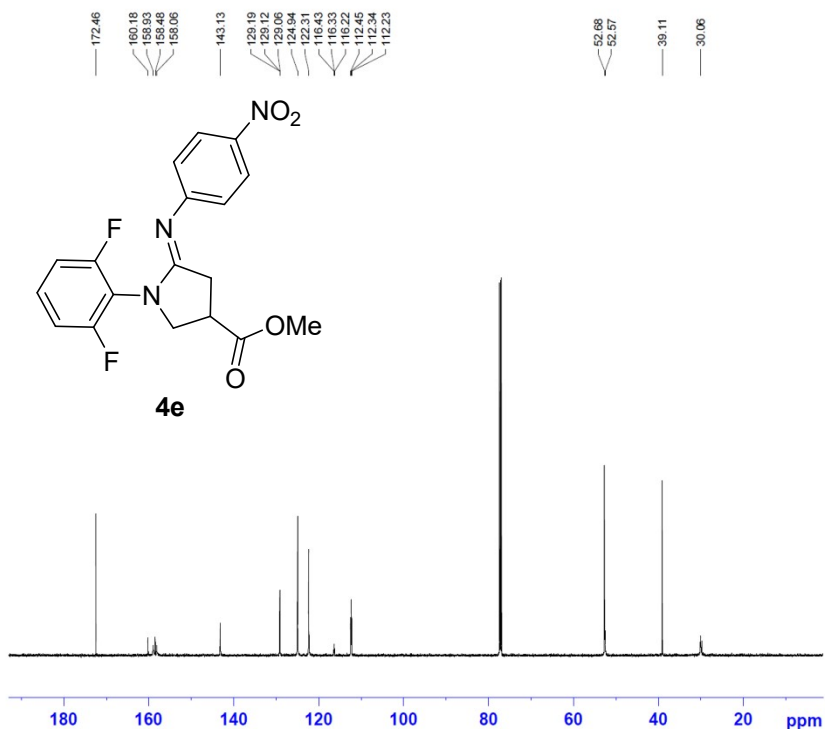

```

NAME          4e
EXPNO         15
PROCNO        1
Date_         20190410
Time         13.31
INSTRUM       spect
PROBHD        5 mm PABBO BB/
PULPROG       zgpg30
TD            65536
SOLVENT       CDCl3
NS            877
DS            4
SWH           36057.691 Hz
FIDRES        0.550197 Hz
AQ            0.9088159 sec
RG            192.21
DW            13.867 usec
DE            6.50 usec
TE            299.4 K
D1            2.00000000 sec
D11           0.03000000 sec
TDO           1
  
```

```

===== CHANNEL f1 =====
SF01          150.8062409 MHz
NUC1          13C
P1            11.00 usec
SI            32768
SF            150.7896443 MHz
WWSB         EM
SSB           0
LB            1.00 Hz
GB            0
PC            1.40
  
```

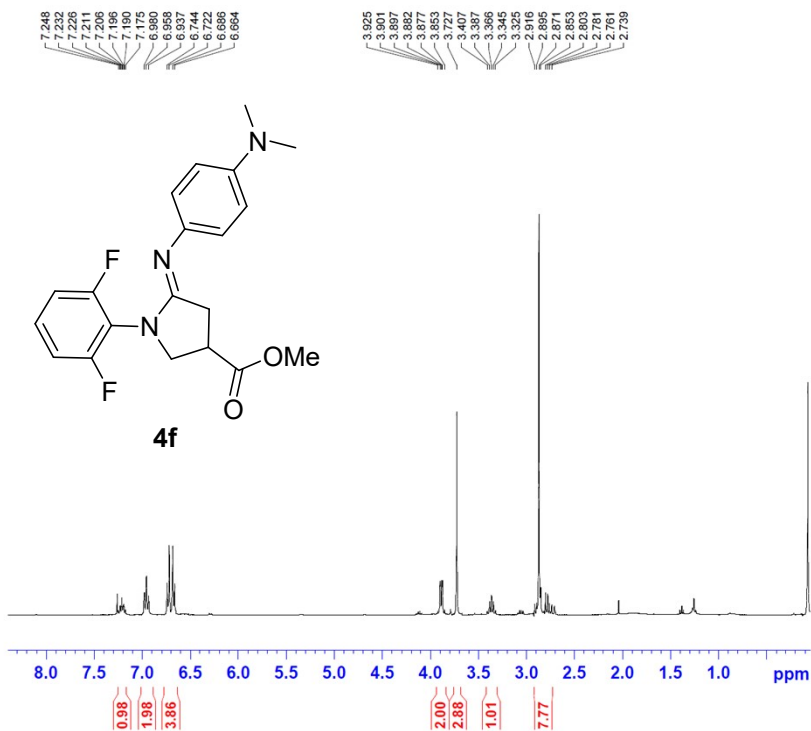

```

NAME          4f
EXPNO         1
PROCNO        1
Date_         20190111
Time         18.15
INSTRUM       spect
PROBHD        5 mm PABBO BB-
PULPROG       zg30
TD            65536
SOLVENT       CDCl3
NS            16
DS            2
SWH           8278.146 Hz
FIDRES        0.126314 Hz
AQ            3.9584243 sec
RG            114
DW            60.400 usec
DE            6.50 usec
TE            300.0 K
D1            1.00000000 sec
TDO           1
  
```

```

===== CHANNEL f1 =====
NUC1          1H
P1            16.50 usec
PL1           0.00 dB
PL1W          15.07131863 W
SF01          400.1324710 MHz
SI            32768
SF            400.1300093 MHz
WWSB         EM
SSB           0
LB            0.30 Hz
GB            0
PC            1.00
  
```



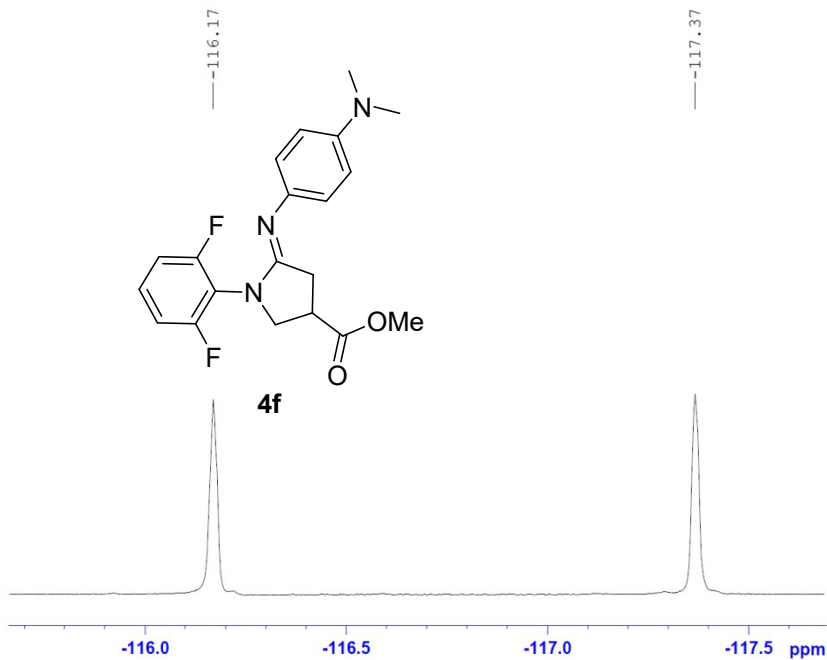

```

NAME          4f
EXPNO         7
PROCNO        1
Date_         20190117
Time          14.55
INSTRUM       spect
PROBHD        5 mm PABBO BB-
PULPROG       zgpg30
TD            524288
SOLVENT       CDC13
NS            32
DS            4
SWH           75187.969 Hz
FIDRES        0.143410 Hz
AQ            3.4865651 sec
RG            4096
DW            6.650 usec
DE            6.50 usec
TE            300.0 K
D1            1.00000000 sec
D11           0.03000000 sec
D12           0.00002000 sec
TD0           1
  
```

```

----- CHANNEL f1 -----
NUC1          19F
P1            15.00 usec
PL1           3.21 dB
SFO1          376.4682462 MHz
  
```

```

----- CHANNEL f2 -----
CPDPRG2       waltz16
NUC2          1H
PCPD2         80.00 usec
PL2           0.00 dB
PL12          13.71 dB
PL1W          15.07131863 W
PL12W         0.64143294 W
SFO2          400.1316005 MHz
SI            65536
SF            376.4985624 MHz
WDW           EM
SSB           0
LB            0.30 Hz
GB            0
PC            1.00
  
```

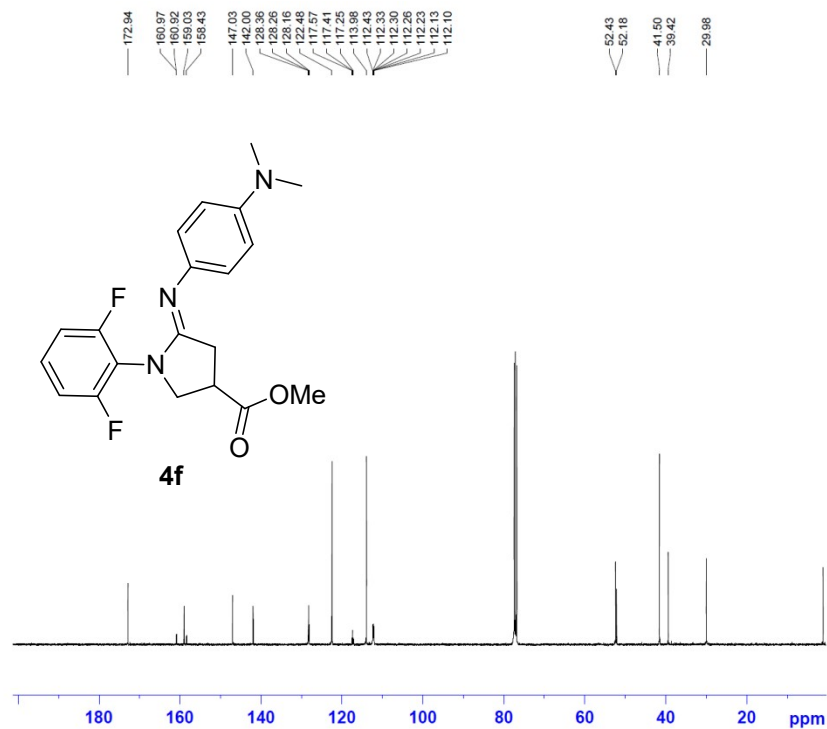

```

NAME          4f
EXPNO         5
PROCNO        1
Date_         20190417
Time          4.07
INSTRUM       spect
PROBHD        5 mm PABBO BB-
PULPROG       zgpg30
TD            85536
SOLVENT       CDC13
NS            2560
DS            4
SWH           23990.014 Hz
FIDRES        0.365918 Hz
AQ            1.3664756 sec
RG            9195.2
DW            20.850 usec
DE            6.50 usec
TE            300.0 K
D1            2.00000000 sec
D11           0.03000000 sec
TD0           1
  
```

```

----- CHANNEL f1 -----
NUC1          13C
P1            24.00 usec
PL1           -2.00 dB
PL1W          59.71607590 W
SFO1          100.6238364 MHz
  
```

```

----- CHANNEL f2 -----
CPDPRG2       waltz16
NUC2          1H
PCPD2         80.00 usec
PL2           0.00 dB
PL12          13.71 dB
PL13          18.00 dB
PL1W          15.07131863 W
PL12W         0.64143294 W
PL13W         0.23886430 W
SFO2          400.1316005 MHz
SI            32768
SF            100.6127561 MHz
WDW           EM
SSB           0
LB            1.00 Hz
GB            0
PC            1.40
  
```

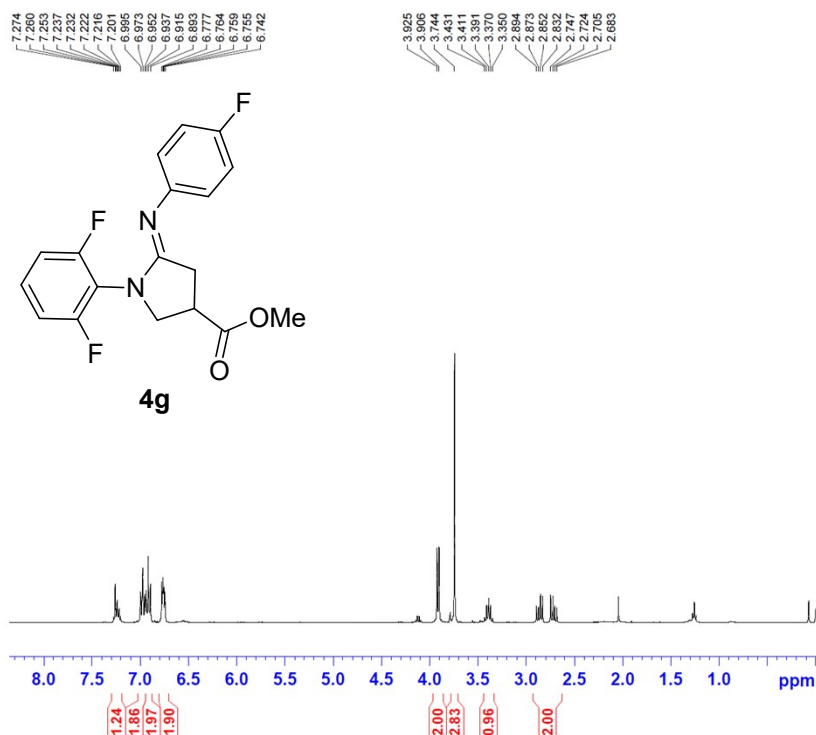

```

NAME          4g
EXPNO         1
PROCNO        1
Date_         20181214
Time          12.04
INSTRUM       spect
PROBHD        5 mm PABBO BB-
PULPROG       zg30
TD            65536
SOLVENT       CDCl3
NS            16
DS            2
SWH           8278.146 Hz
FIDRES        0.126314 Hz
AQ            3.9584243 sec
RG            161.3
DW            60.400 usec
DE            6.50 usec
TE            300.0 K
DL            1.00000000 sec
TD0           1
  
```

```

===== CHANNEL f1 =====
NUC1          1H
P1            16.50 usec
PL1           0.00 dB
PL1W          15.07131863 W
SF01          400.1324710 MHz
SI            32768
SF            400.1300092 MHz
WDW           EM
SSB           0
LB            0.30 Hz
GB            0
PC            1.00
  
```

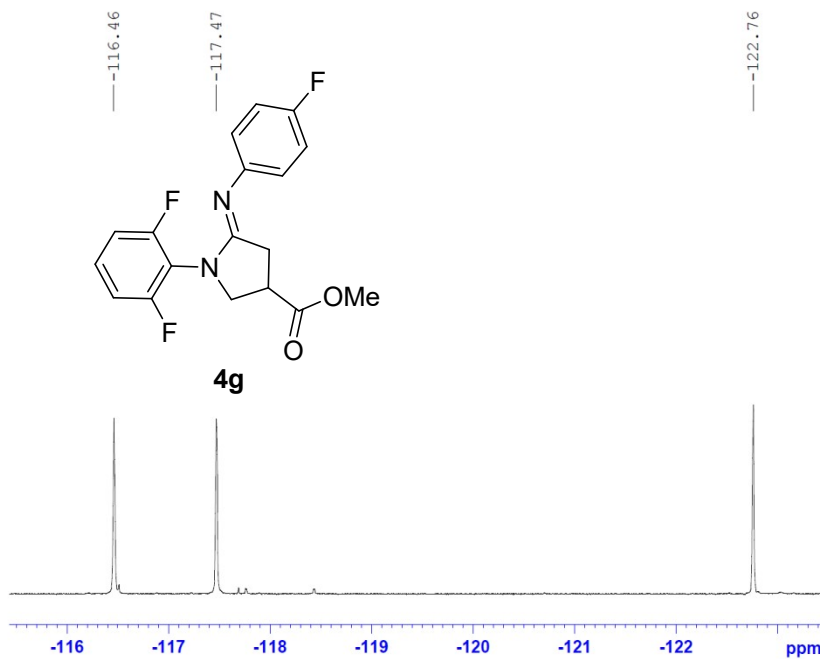

```

NAME          4g
EXPNO         7
PROCNO        1
Date_         20181217
Time          10.05
INSTRUM       spect
PROBHD        5 mm PABBO BB-
PULPROG       zgfhiggn
TD            524288
SOLVENT       CDCl3
NS            32
DS            4
SWH           75187.969 Hz
FIDRES        0.143410 Hz
AQ            3.4865651 sec
RG            4096
DW            6.650 usec
DE            6.50 usec
TE            300.0 K
DL            1.00000000 sec
D11           0.03000000 sec
D12           0.00002000 sec
TD0           1
  
```

```

===== CHANNEL f1 =====
NUC1          13C
P1            15.00 usec
PL1           3.21 dB
SF01          376.4682462 MHz

===== CHANNEL f2 =====
CPDPRG2       waltz16
NUC2          1H
PCPD2         80.00 usec
PL2           0.00 dB
PL12          13.71 dB
PL2W          15.07131863 W
PL12W         0.64143294 W
SF02          400.1316005 MHz
SI            65536
SF            376.4985601 MHz
WDW           EM
SSB           0
LB            0.30 Hz
GB            0
PC            1.00
  
```

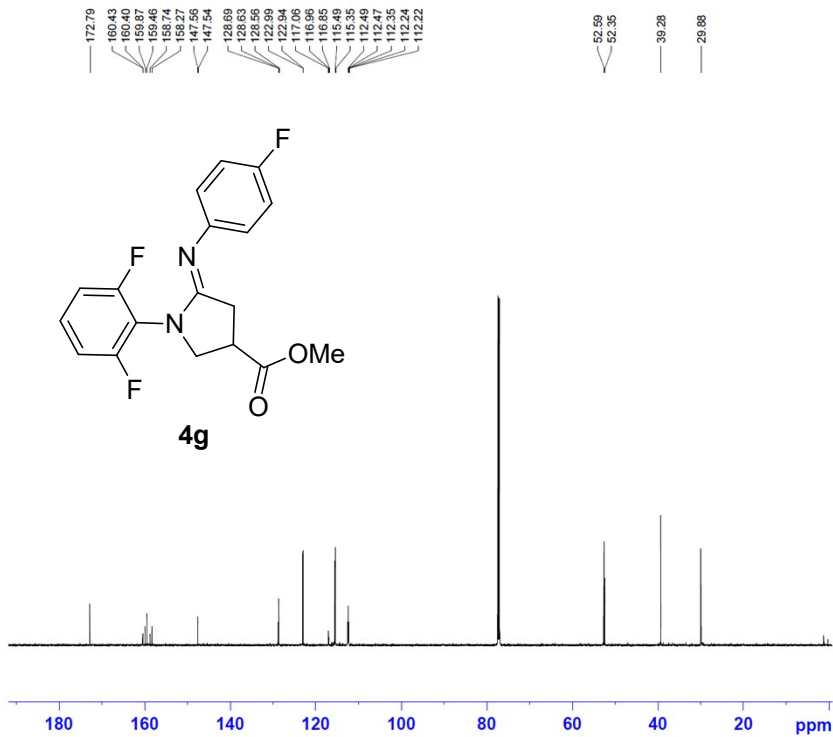

```

NAME          4g
EXPNO         15
PROCNO        1
Date_         20190410
Time          10.10
INSTRUM       spect
PROBHD        5 mm PABBO BB/
PULPROG       zgpg30
TD            65536
SOLVENT       CDCl3
NS            1430
DS            4
SWH           36057.691 Hz
FIDRES        0.550197 Hz
AQ            0.9088159 sec
RG            192.21
DW            13.967 usec
DE            6.50 usec
TE            298.9 K
D1            2.00000000 sec
D11           0.03000000 sec
TD0           1

```

```

===== CHANNEL f1 =====
SFOL          150.8062409 MHz
NUCL1         13C
P1            11.00 usec
SI            32768
SF            150.7896377 MHz
WDW           EM
SSB           0
LB            1.00 Hz
GB            0
PC            1.40

```

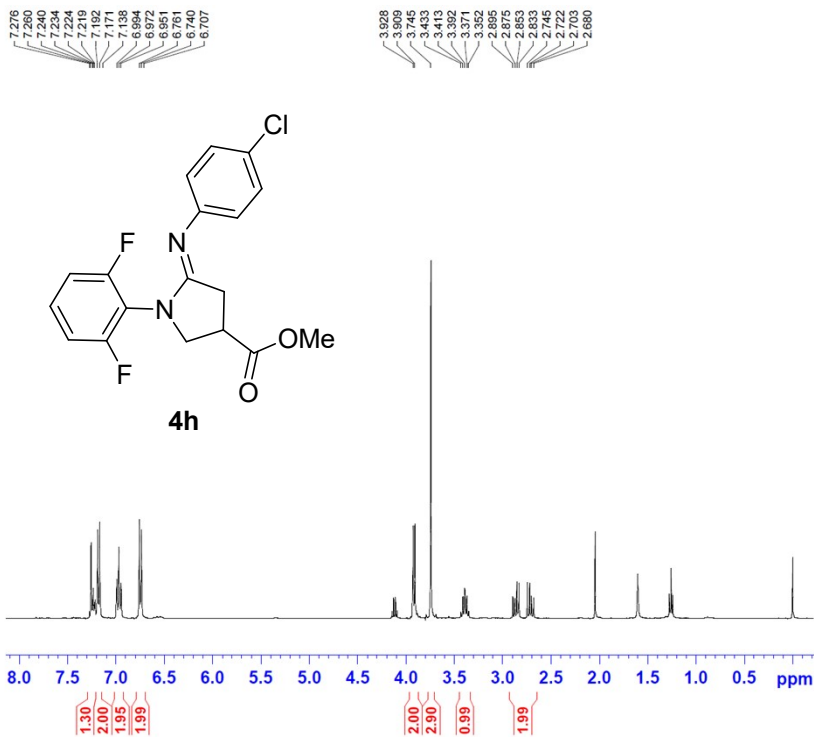

```

NAME          4h
EXPNO         1
PROCNO        1
Date_         20181214
Time          11.45
INSTRUM       spect
PROBHD        5 mm PABBO BB-
PULPROG       zg30
TD            65536
SOLVENT       CDCl3
NS            16
DS            2
SWH           8278.146 Hz
FIDRES        0.126314 Hz
AQ            3.9584243 sec
RG            181
DW            60.400 usec
DE            6.50 usec
TE            300.0 K
D1            1.00000000 sec
TD0           1

```

```

===== CHANNEL f1 =====
NUCL1         1H
P1            16.50 usec
PL1           0.00 dB
PL1W          15.07131863 W
SFOL          400.1324710 MHz
SI            32768
SF            400.1300094 MHz
WDW           EM
SSB           0
LB            0.30 Hz
GB            0
PC            1.00

```

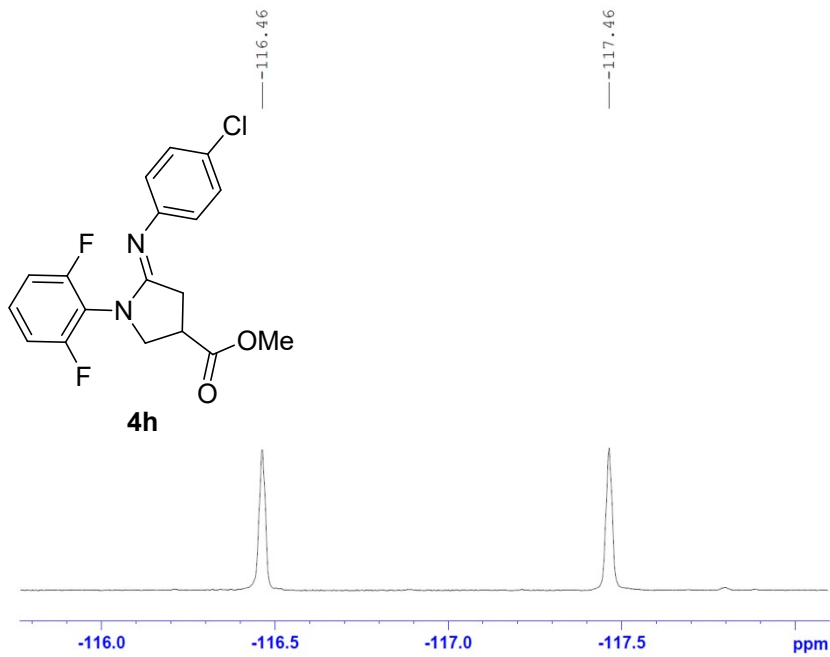

```

NAME          4h
EXPNO         7
PROCNO        1
Date_         20181217
Time          10.17
INSTRUM       spect
PROBHD        5 mm PABBO BB-
PULPROG       zgfhgpn
TD            524288
SOLVENT       CDCl3
NS            32
DS            4
SWH           75187.969 Hz
FIDRES        0.143410 Hz
AQ            3.4865651 sec
RG            4096
DW            6.650 usec
DE            6.50 usec
TE            300.0 K
D1            1.00000000 sec
D11           0.03000000 sec
D12           0.00020000 sec
TD0           1
  
```

```

===== CHANNEL f1 =====
NUC1          19F
P1            15.00 usec
PL1           3.21 dB
SFO1         376.4682462 MHz
  
```

```

===== CHANNEL f2 =====
CPDPRG2       waltz16
NUC2          1H
PCPD2         80.00 usec
PL2           0.00 dB
PL12         13.71 dB
PL2W         15.07131863 W
PL12W        0.64143294 W
SFO2         400.1316005 MHz
SI           65536
SF           376.4985612 MHz
WDW           EM
SSB           0
LB            0.30 Hz
GB            0
PC            1.00
  
```

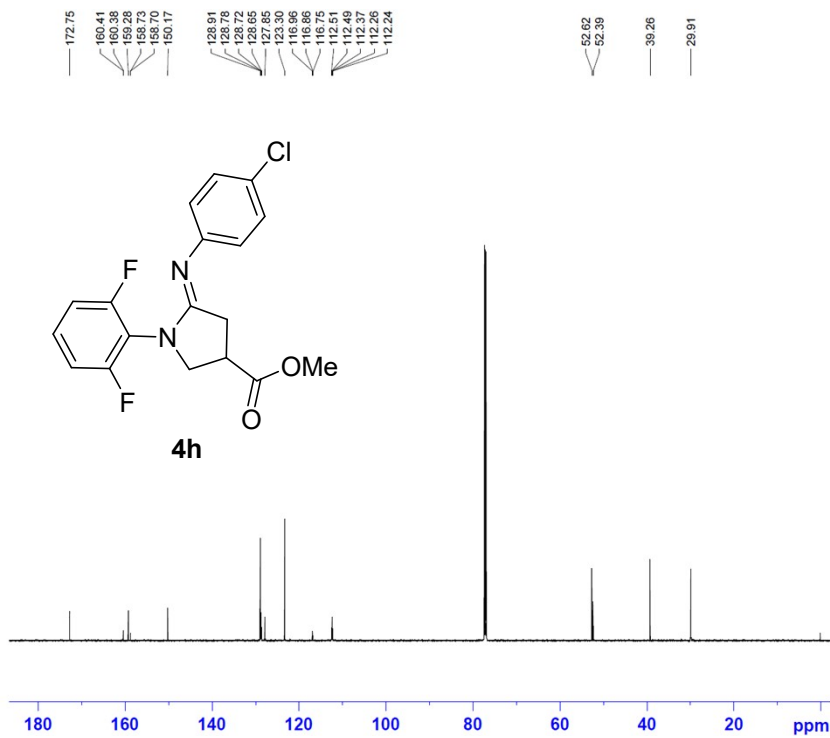

```

NAME          4h
EXPNO         15
PROCNO        1
Date_         20190410
Time          8.37
INSTRUM       spect
PROBHD        5 mm PABBO BB/
PULPROG       zgpg30
TD            65536
SOLVENT       CDCl3
NS            2048
DS            4
SWH           36057.691 Hz
FIDRES        0.550197 Hz
AQ            0.9088159 sec
RG            192.21
DW            13.867 usec
DE            6.50 usec
TE            298.7 K
D1            2.00000000 sec
D11           0.03000000 sec
TD0           1
  
```

```

===== CHANNEL f1 =====
SFO1         150.8062409 MHz
NUC1         13C
P1            11.00 usec
SI           32768
SF           150.7896361 MHz
WDW           EM
SSB           0
LB            1.00 Hz
GB            0
PC            1.40
  
```

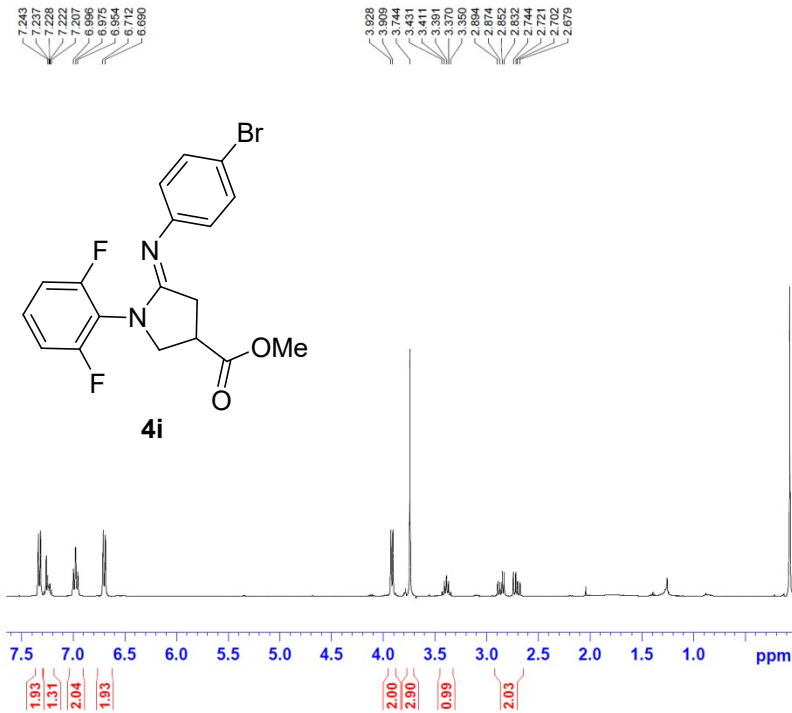

```

NAME          4i
EXPNO         1
PROCNO        1
Date_         20190111
Time          18.05
INSTRUM       spect
PROBHD        5 mm PABBO BB-
PULPROG       zg30
TD            65536
SOLVENT       CDCl3
NS            16
DS            2
SWH           8278.146 Hz
FIDRES        0.126314 Hz
AQ            3.9584243 sec
RG            128
DW            60.400 usec
DE            6.50 usec
TE            300.0 K
D1            1.00000000 sec
D10           1
  
```

----- CHANNEL f1 -----

```

NUC1          1H
P1            16.50 usec
PL1           0.00 dB
PL1W         15.07131863 W
SFO1         400.1324710 MHz
SI           32768
SF           400.1300092 MHz
WWM          EM
SSB           0
LB            0.30 Hz
GB            0
PC            1.00
  
```

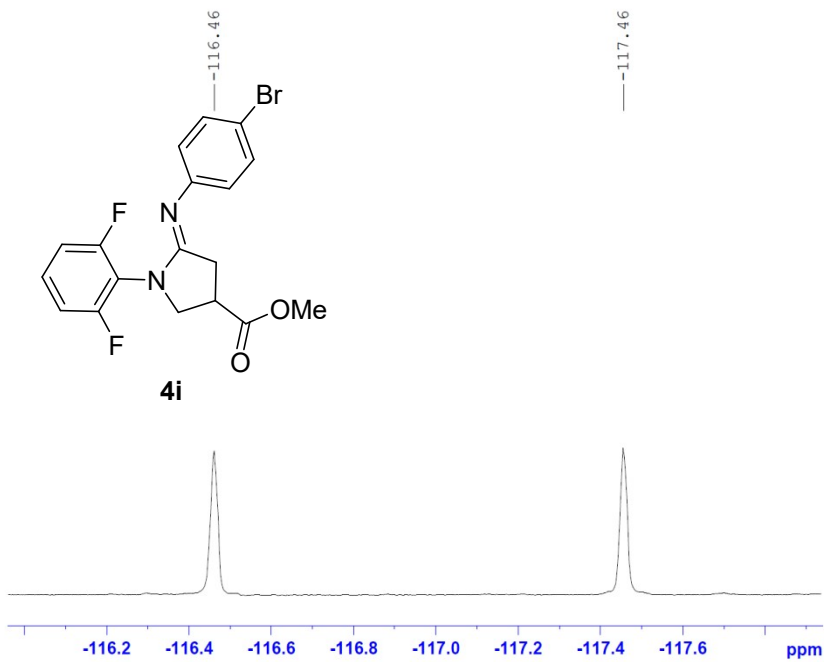

```

NAME          4i
EXPNO         7
PROCNO        1
Date_         20190117
Time          14.44
INSTRUM       spect
PROBHD        5 mm PABBO BB-
PULPROG       zgfhgqn
TD            524288
SOLVENT       CDCl3
NS            32
DS            4
SWH           75187.969 Hz
FIDRES        0.143410 Hz
AQ            3.4865651 sec
RG            4096
DW            6.650 usec
DE            6.50 usec
TE            300.0 K
D1            1.00000000 sec
D11           0.03000000 sec
D12           0.00002000 sec
D10           1
  
```

----- CHANNEL f1 -----

```

NUC1          13C
P1            15.00 usec
PL1           3.21 dB
SFO1         376.4682462 MHz
  
```

----- CHANNEL f2 -----

```

CPDPRG2       waltz16
NUC2          1H
PCPD2         80.00 usec
PL2           0.00 dB
PL12          13.71 dB
PL2W         15.07131863 W
PL12W        0.64143294 W
SFO2         400.1316005 MHz
SI           65536
SF           376.4985624 MHz
WDM          EM
SSB           0
LB            0.30 Hz
GB            0
PC            1.00
  
```

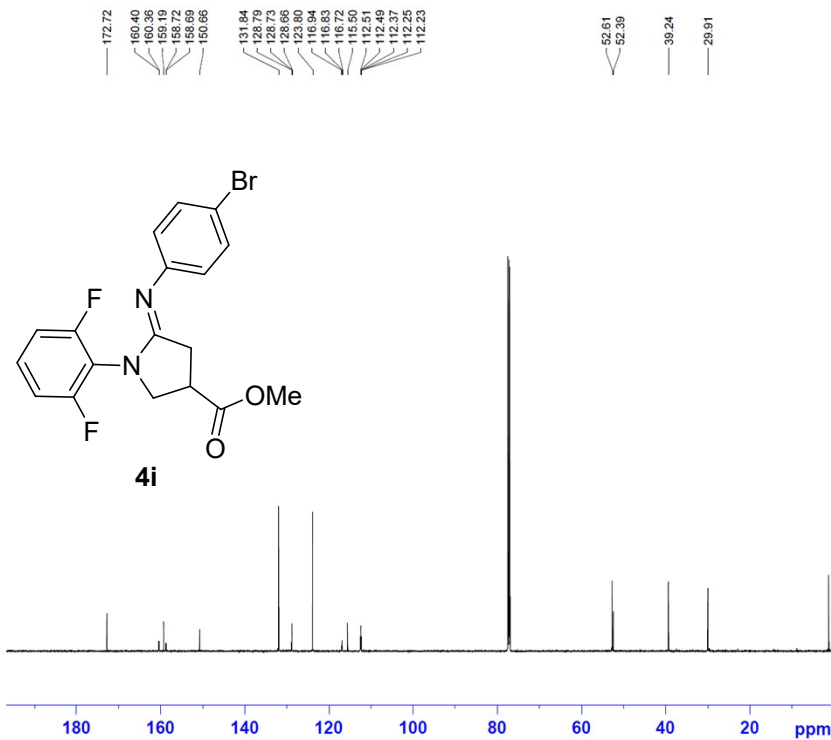

```

NAME          4i
EXPNO         15
PROCNO        1
Date_         20190409
Time          16.40
INSTRUM       spect
PROBHD        5 mm PABBO BB/
PULPROG       zgpg30
TD            65536
SOLVENT       CDCl3
NS            2048
DS            4
SWH           36057.691 Hz
FIDRES        0.550197 Hz
AQ            0.9088159 sec
RG            192.21
LW           13.967 usec
DE            6.50 usec
TE            299.0 K
D1            2.00000000 sec
D11           0.03000000 sec
TD0           1
===== CHANNEL f1 =====
SF01          150.8062409 MHz
NUC1          13C
P1            11.00 usec
SI            32768
SF            150.7896371 MHz
WDW           EM
SSB           0
LB            1.00 Hz
GB            0
PC            1.40

```

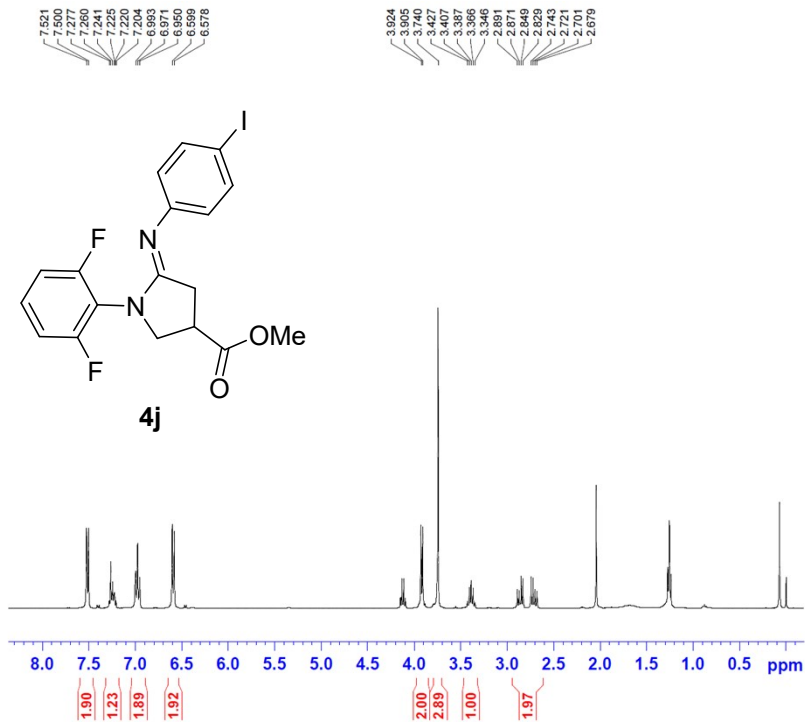

```

NAME          4j
EXPNO         1
PROCNO        1
Date_         20181220
Time          12.31
INSTRUM       spect
PROBHD        5 mm PABBO BB-
PULPROG       zg30
TD            65536
SOLVENT       CDCl3
NS            16
DS            2
SWH           8278.146 Hz
FIDRES        0.126314 Hz
AQ            3.9584243 sec
RG            128
LW            60.400 usec
DE            6.50 usec
TE            300.0 K
D1            1.00000000 sec
TD0           1
===== CHANNEL f1 =====
NUC1          1H
P1            16.50 usec
PL1           0.00 dB
PL1W          15.07131863 W
SF01          400.1324710 MHz
SI            32768
SF            400.1300092 MHz
WDW           EM
SSB           0
LB            0.30 Hz
GB            0
PC            1.00

```

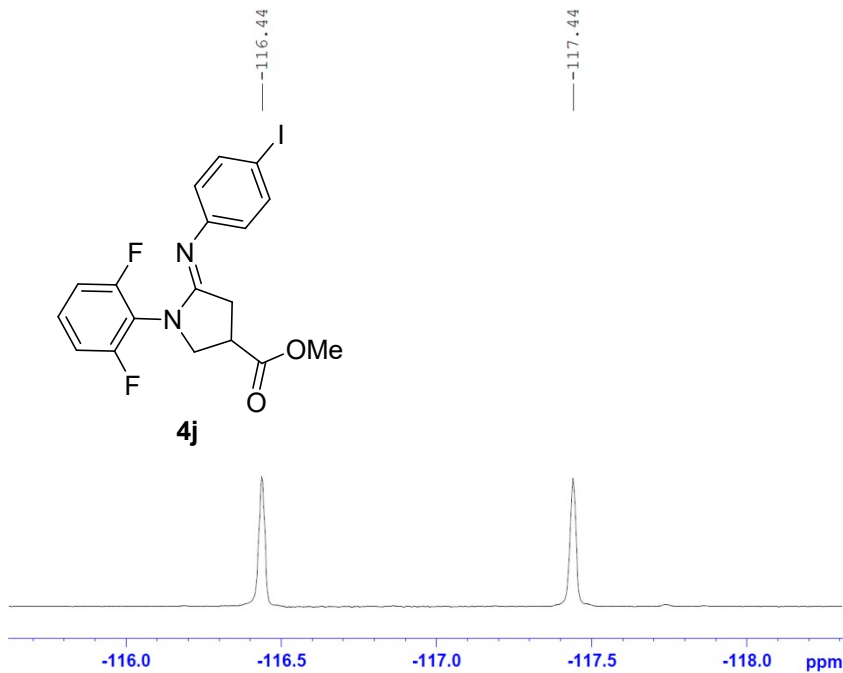

```

NAME          4j
EXPNO         7
PROCNO        1
Date_         20181220
Time_        12.37
INSTRUM       spect
PROBHD        5 mm PABBO BB-
PULPROG       zgpg30
TD            524288
SOLVENT       CDCl3
NS            32
DS            4
SWH           75187.969 Hz
FIDRES        0.143410 Hz
AQ            3.4865651 sec
RG            4096
DW            6.650 usec
DE            6.50 usec
TE            300.0 K
D1            1.00000000 sec
D11           0.03000000 sec
D12           0.00002000 sec
TD0           1
  
```

```

===== CHANNEL f1 =====
NUC1          19F
P1            15.00 usec
PL1           3.21 dB
SFO1          376.4682462 MHz
  
```

```

===== CHANNEL f2 =====
CPDPRG2      waltz16
NUC2          1H
PCPD2        80.00 usec
PL2           0.00 dB
PL12         13.71 dB
PL2W         15.07131863 W
PL12W        0.64143294 W
SFO2          400.1316005 MHz
SI            65536
SF            376.4985612 MHz
WDW           EM
SSB           0
LB            0.30 Hz
GB            0
PC            1.00
  
```

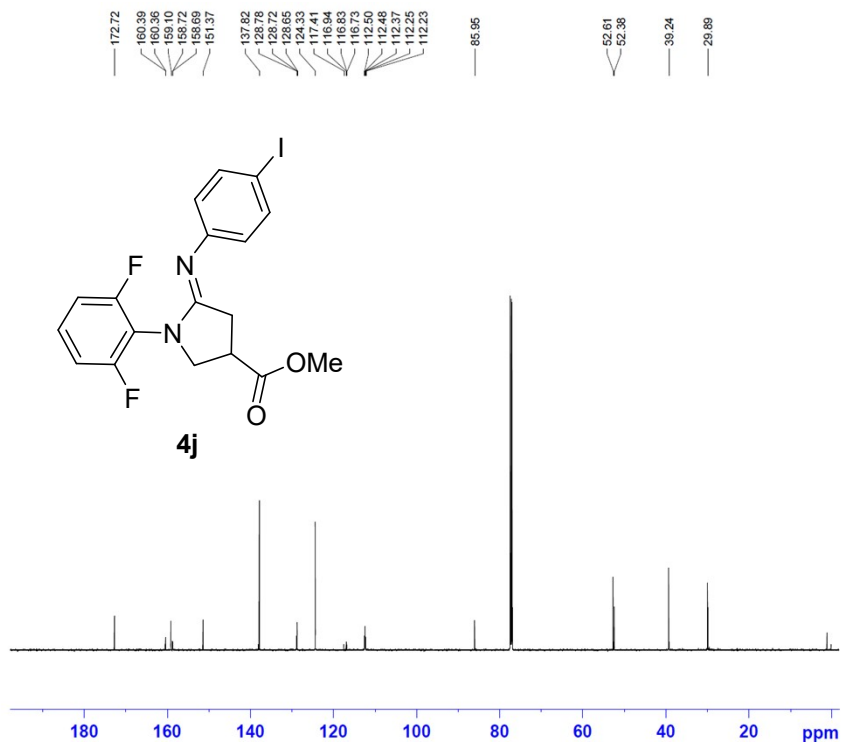

```

NAME          4j
EXPNO         15
PROCNO        1
Date_         20190410
Time_        14.13
INSTRUM       spect
PROBHD        5 mm PABBO BB-
PULPROG       zgpg30
TD            65536
SOLVENT       CDCl3
NS            1841
DS            4
SWH           36057.691 Hz
FIDRES        0.550197 Hz
AQ            0.9088159 sec
RG            192.21
DW            13.867 usec
DE            6.50 usec
TE            299.4 K
D1            2.00000000 sec
D11           0.03000000 sec
TD0           1
  
```

```

===== CHANNEL f1 =====
SFO1          150.8062409 MHz
NUC1          13C
P1            11.00 usec
SI            32768
SF            150.7896371 MHz
WDW           EM
SSB           0
LB            1.00 Hz
GB            0
PC            1.40
  
```

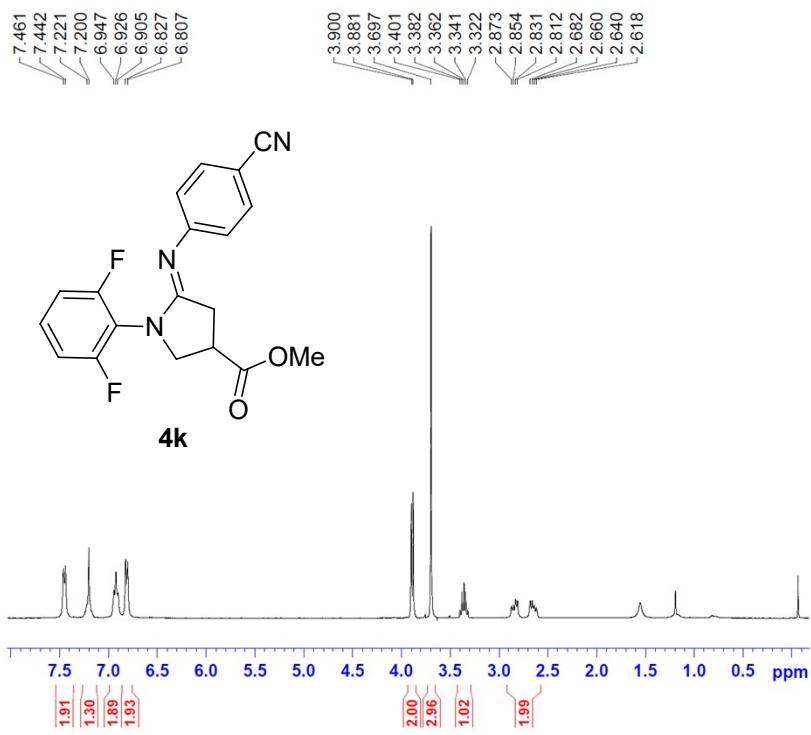

```

NAME          4k
EXPNO         1
PROCNO        1
Date_         20181221
Time_         17.15
INSTRUM       spect
PROBHD        5 mm PABBO BB-
PULPROG       zg30
TD            65536
SOLVENT       CDCl3
NS            16
DS            2
SWH           8278.146 Hz
FIDRES        0.126314 Hz
AQ           3.9584243 sec
RG            181
DW           60.400 usec
DE           6.50 usec
TE           300.0 K
D1           1.00000000 sec
TDO           1
===== CHANNEL f1 =====
NUC1          1H
P1            16.50 usec
PL1           0.00 dB
PL1W          15.07131863 W
SFO1          400.1324710 MHz
SI            32768
SF            400.1300330 MHz
WDW           EM
SSB           0
LB            0.30 Hz
GB            0
PC            1.00

```

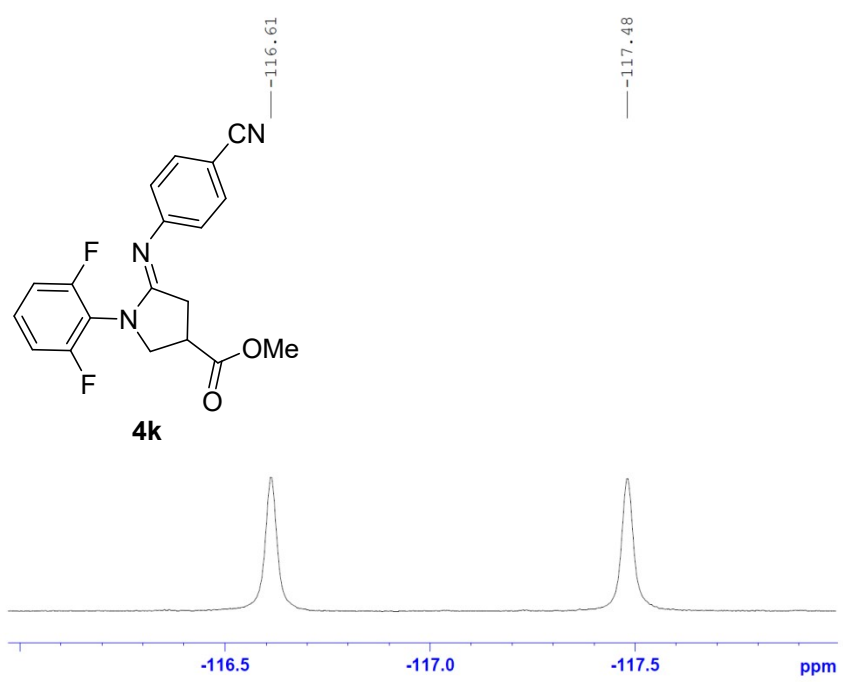

```

NAME          4k
EXPNO         7
PROCNO        1
Date_         20181221
Time_         17.19
INSTRUM       spect
PROBHD        5 mm PABBO BB-
PULPROG       zgpg30
TD            524288
SOLVENT       CDCl3
NS            32
DS            4
SWH           75187.969 Hz
FIDRES        0.143410 Hz
AQ           3.4865651 sec
RG            4096
DW           6.650 usec
DE           6.50 usec
TE           300.0 K
D1           1.00000000 sec
D11          0.03000000 sec
D12          0.00002000 sec
TDO           1
===== CHANNEL f1 =====
NUC1          13C
P1            15.00 usec
PL1           3.21 dB
SFO1          376.4682462 MHz
===== CHANNEL f2 =====
CPDPRG2       waltz16
NUC2          1H
PCPD2         80.00 usec
PL2           0.00 dB
PL12          13.71 dB
PL2W          15.07131863 W
PL12W         0.64143294 W
SFO2          400.1316005 MHz
SI            65536
SF            376.4985600 MHz
WDW           EM
SSB           0
LB            0.30 Hz
GB            0
PC            1.00

```



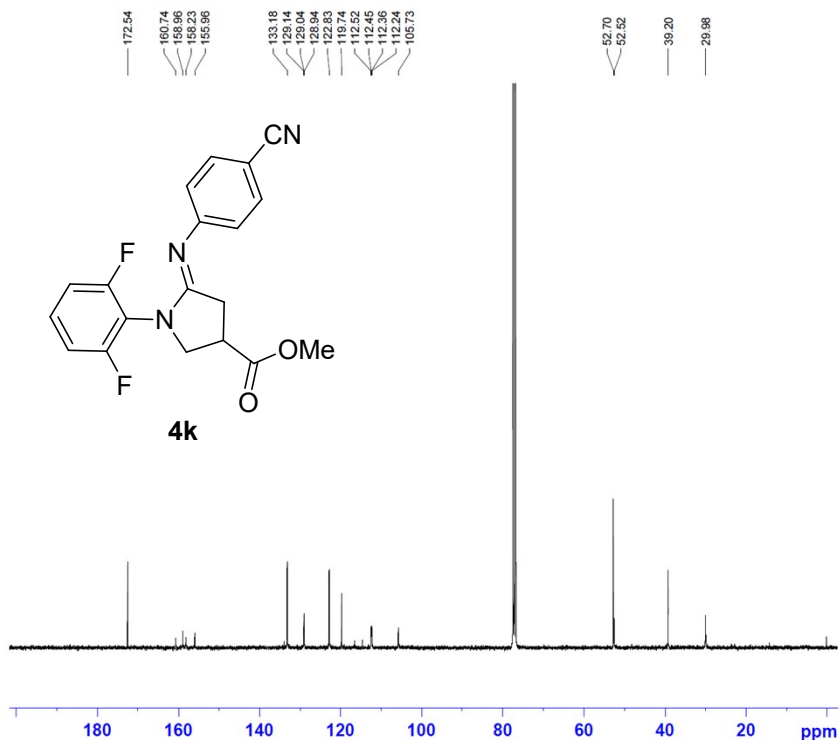

```

NAME          4k
EXPNO         5
PROCNO        1
Date_         20190413
Time          23.07
INSTRUM      spect
PROBHD       5 mm FAPBO BB-
PULPROG      zgpg30
TD           65536
SOLVENT      CDCl3
NS           5120
DS           4
SWH          23980.814 Hz
FIDRES       0.365918 Hz
AQ           1.3664756 sec
RG           11585.2
DW           20.850 usec
DE           6.50 usec
TE           300.0 K
D1           2.00000000 sec
D11          0.03000000 sec
TD0          1
  
```

```

===== CHANNEL f1 =====
NUC1          13C
P1            24.00 usec
PL1           -2.00 dB
PL1W         59.71607590 W
SF01         100.6238364 MHz
  
```

```

===== CHANNEL f2 =====
CPDPRG2      waltz16
NUC2          1H
PCPD2        80.00 usec
PL2           0.00 dB
PL12         13.71 dB
PL13         18.00 dB
PL2W         15.07131863 W
PL12W        0.64143294 W
PL13W        0.23886430 W
SF02         400.1316005 MHz
SI           32768
SF           100.6127546 MHz
WDW          EM
SSB           0
LB           1.00 Hz
GB           0
PC           1.40
  
```

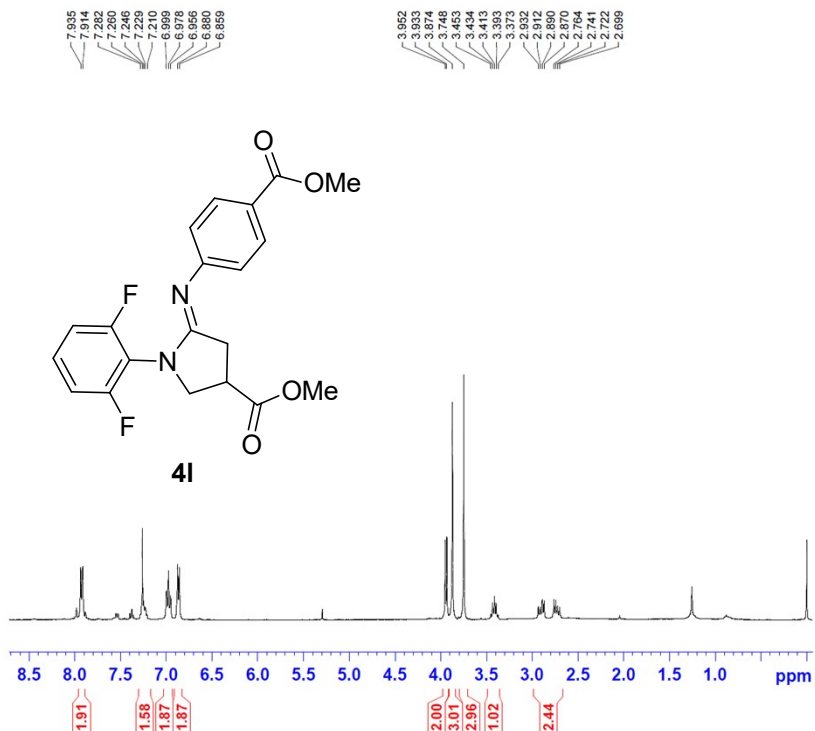

```

NAME          4l
EXPNO         1
PROCNO        1
Date_         20191220
Time          17.46
INSTRUM      spect
PROBHD       5 mm FAPBO BB-
PULPROG      zg30
TD           65536
SOLVENT      CDCl3
NS           16
DS           2
SWH          8278.146 Hz
FIDRES       0.126314 Hz
AQ           3.9584243 sec
RG           228.1
DW           60.400 usec
DE           6.50 usec
TE           300.0 K
D1           1.00000000 sec
TD0          1
  
```

```

===== CHANNEL f1 =====
NUC1          1H
P1            16.50 usec
PL1           0.00 dB
PL1W         15.07131863 W
SF01         400.1324710 MHz
SI           32768
SF           400.1300093 MHz
WDW          EM
SSB           0
LB           0.30 Hz
GB           0
PC           1.00
  
```

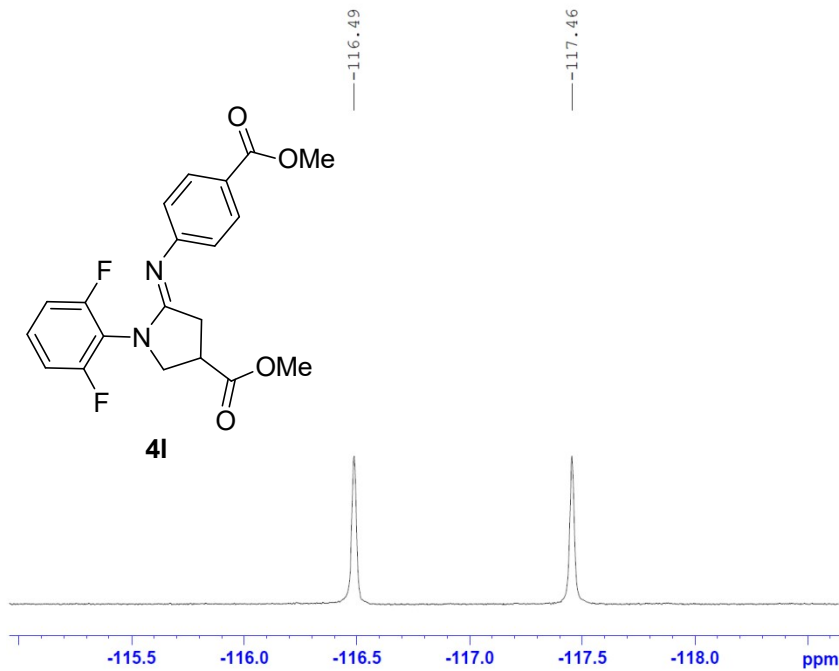

```

NAME          4I
EXPNO         7
PROCNO        1
Date_         20181220
Time          17.51
INSTRUM       spect
PROBHD        5 mm PABBO BB-
PULPROG       zgpg30
TD            65536
SOLVENT       CDCl3
NS            4096
DS            4
SWH           75187.969 Hz
FIDRES        0.143410 Hz
AQ            3.4865651 sec
RG            5792.6
DW            6.650 usec
DE            6.50 usec
TE            300.0 K
D1            1.00000000 sec
D11           0.03000000 sec
D12           0.00002000 sec
TD0           1
  
```

```

===== CHANNEL f1 =====
NUC1          13C
P1            19F usec
PL1           3.21 dB
SFO1          376.4682462 MHz

===== CHANNEL f2 =====
CPDPRG2       waltz16
NUC2          1H
PCPD2         80.00 usec
PL2           0.00 dB
PL12          13.71 dB
PL2W          15.07131863 W
PL12W         0.64143294 W
SFO2          400.1316005 MHz
SI            65536
SF            376.4985599 MHz
WDW           EM
SSB           0
LB            0.30 Hz
GB            0
PC            1.00
  
```

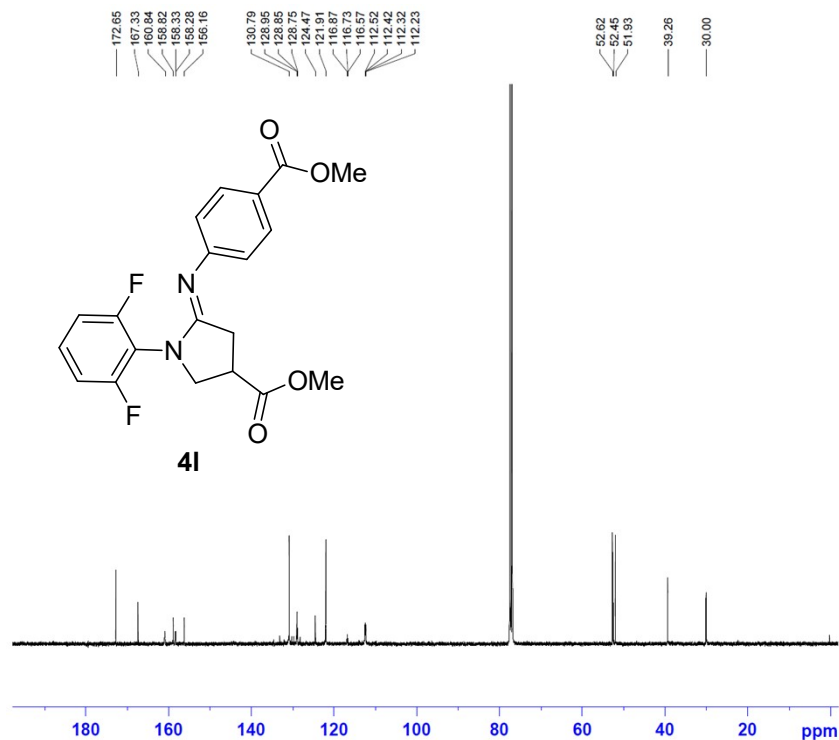

```

NAME          4I
EXPNO         5
PROCNO        1
Date_         20190414
Time          4.41
INSTRUM       spect
PROBHD        5 mm PABBO BB-
PULPROG       zgpg30
TD            65536
SOLVENT       CDCl3
NS            4096
DS            4
SWH           23980.814 Hz
FIDRES        0.365918 Hz
AQ            1.3664756 sec
RG            13004
DW            20.850 usec
DE            6.50 usec
TE            300.0 K
D1            2.00000000 sec
D11           0.03000000 sec
TD0           1
  
```

```

===== CHANNEL f1 =====
NUC1          13C
P1            24.00 usec
PL1           -2.00 dB
PL1W          59.71607590 W
SFO1          100.6238364 MHz

===== CHANNEL f2 =====
CPDPRG2       waltz16
NUC2          1H
PCPD2         80.00 usec
PL2           0.00 dB
PL12          13.71 dB
PL13          18.00 dB
PL2W          15.07131863 W
PL12W         0.64143294 W
PL13W         0.23886430 W
SFO2          400.1316005 MHz
SI            32768
SF            100.6127546 MHz
WDW           EM
SSB           0
LB            1.00 Hz
GB            0
PC            1.40
  
```

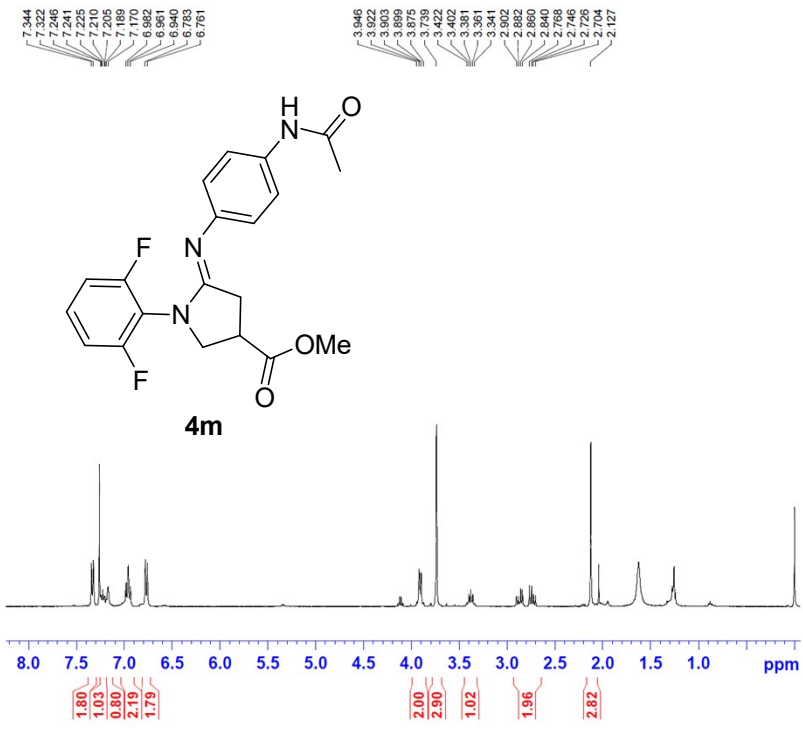

```

NAME          4m
EXPNO         1
PROCNO        1
Date_         20181228
Time_         17.51
INSTRUM       spect
PROBHD        5 mm FAPBBO BB-
PULPROG       zg30
TD            65536
SOLVENT       CDCl3
NS            16
DS            2
SWH           8278.146 Hz
FIDRES        0.126314 Hz
AQ           3.9584243 sec
RG            256
DW           60.400 usec
DE            6.50 usec
TE            300.0 K
D1            1.0000000 sec
TD0           1

===== CHANNEL f1 =====
NUC1           1H
P1            16.50 usec
PL1           0.00 dB
PL1W         15.07131863 W
SFO1          400.1324710 MHz
SI            32768
SF            400.1300098 MHz
WDW           EM
SSB           0
LB            0.30 Hz
GB            0
PC            1.00

```

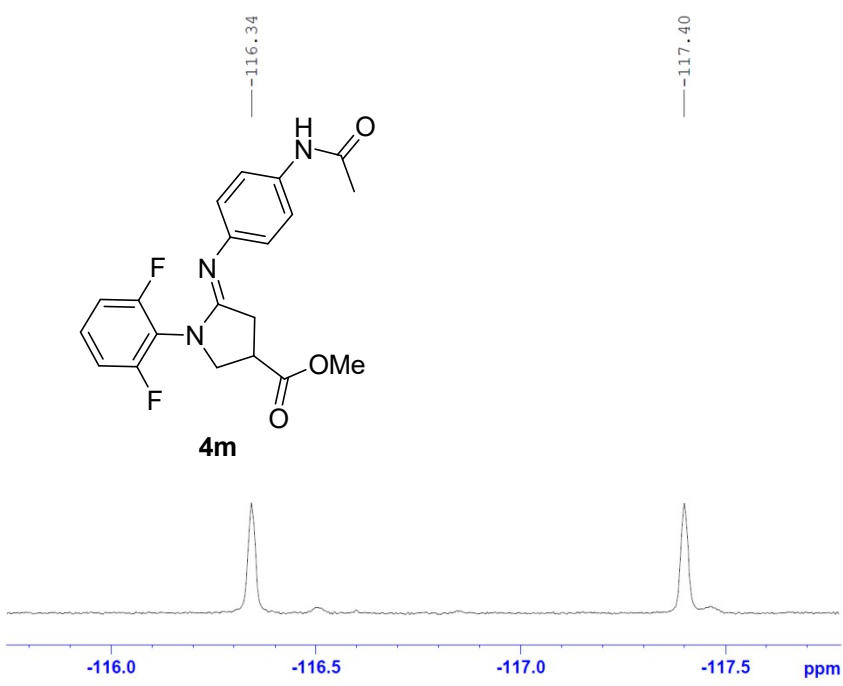

```

NAME          4m
EXPNO         7
PROCNO        1
Date_         20190104
Time_         8.53
INSTRUM       spect
PROBHD        5 mm FAPBBO BB-
PULPROG       zgfg19gm
TD            524288
SOLVENT       CDCl3
NS            32
DS            4
SWH           75187.969 Hz
FIDRES        0.143410 Hz
AQ           3.4865651 sec
RG            7298.2
DW           6.650 usec
DE            6.50 usec
TE            300.0 K
D1            1.0000000 sec
D11           0.0300000 sec
D12           0.0000200 sec
TD0           1

===== CHANNEL f1 =====
NUC1           13C
P1            15.00 usec
PL1           3.21 dB
SFO1          376.4682462 MHz

===== CHANNEL f2 =====
CPDPRG2       waltz16
NUC2           1H
PCPD2         80.00 usec
PL2           0.00 dB
PL12          13.71 dB
PL12W         15.07131863 W
PL12W         0.64143294 W
SFO2          400.1316005 MHz
SI            65536
SF            376.4905612 MHz
WDW           EM
SSB           0
LB            0.30 Hz
GB            0
PC            1.00

```

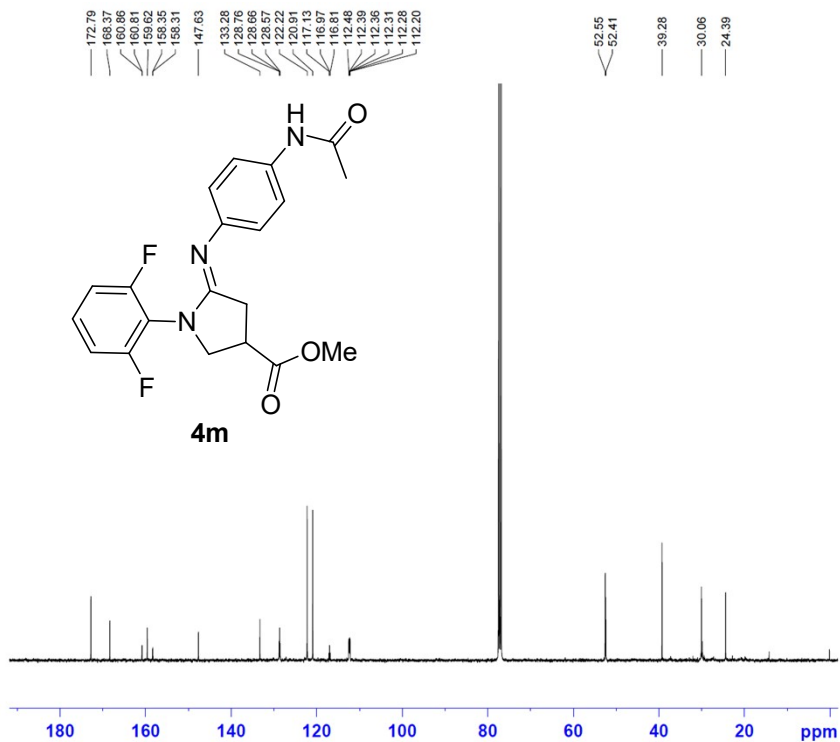

```

NAME          4m
EXPNO         1
PROCNO        1
Date_         20190427
Time         19.22
INSTRUM       spect
PROBHD        5 mm PABBO BB-
PULPROG       zgpg30
TD            65536
SOLVENT       CDCl3
NS            4096
DS            4
SWH           23980.814 Hz
FIDRES        0.365918 Hz
AQ            1.3664756 sec
RG            7298.2
DW            20.850 usec
DE            6.50 usec
TE            300.0 K
D1            2.00000000 sec
D11           0.03000000 sec
TD0           1

===== CHANNEL f1 =====
NUC1          13C
P1            24.00 usec
PL1           -2.00 dB
PL1W          59.71607590 W
SF01          100.6238364 MHz

===== CHANNEL f2 =====
CPDPRG2       waltz16
NUC2          1H
PCPD2         80.00 usec
PL2           0.00 dB
PL12          13.71 dB
PL13          18.00 dB
PL2W          15.07131863 W
PL12W         0.64143294 W
PL13W         0.23886430 W
SF02          400.1316005 MHz
SI            32768
SF            100.6127554 MHz
WDW           EM
SSB           0
LB            1.00 Hz
GB            0
PC            1.40
  
```

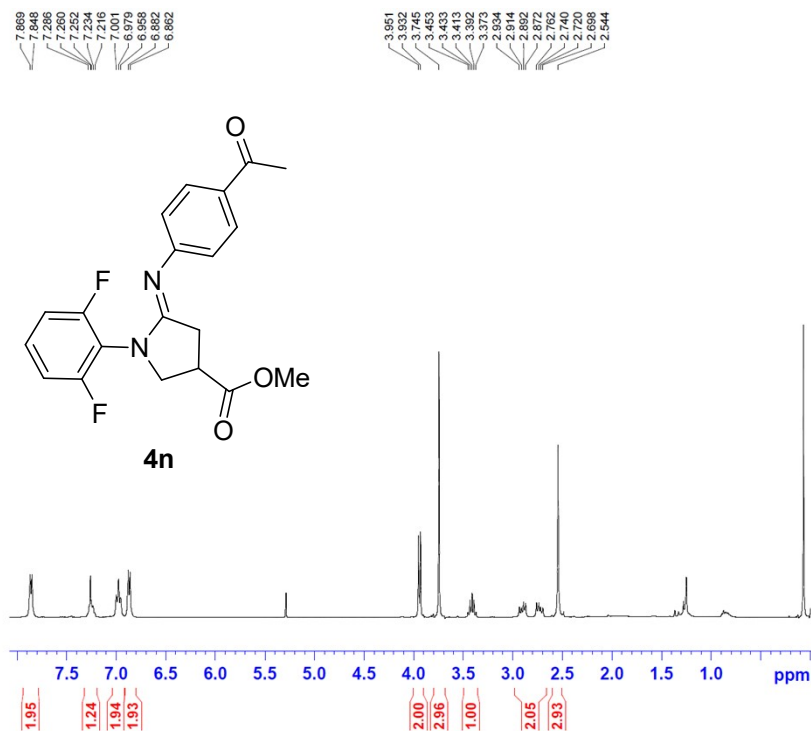

```

NAME          4n
EXPNO         1
PROCNO        1
Date_         20190121
Time         21.52
INSTRUM       spect
PROBHD        5 mm PABBO BB-
PULPROG       zg30
TD            65536
SOLVENT       CDCl3
NS            16
DS            2
SWH           8278.146 Hz
FIDRES        0.126314 Hz
AQ            3.9584243 sec
RG            114
DW            60.400 usec
DE            6.50 usec
TE            300.0 K
D1            1.00000000 sec
TD0           1

===== CHANNEL f1 =====
NUC1          1H
P1            16.50 usec
PL1           0.00 dB
PL1W          15.07131863 W
SF01          400.1324710 MHz
SI            32768
SF            400.1300092 MHz
WDW           EM
SSB           0
LB            0.30 Hz
GB            0
PC            1.00
  
```

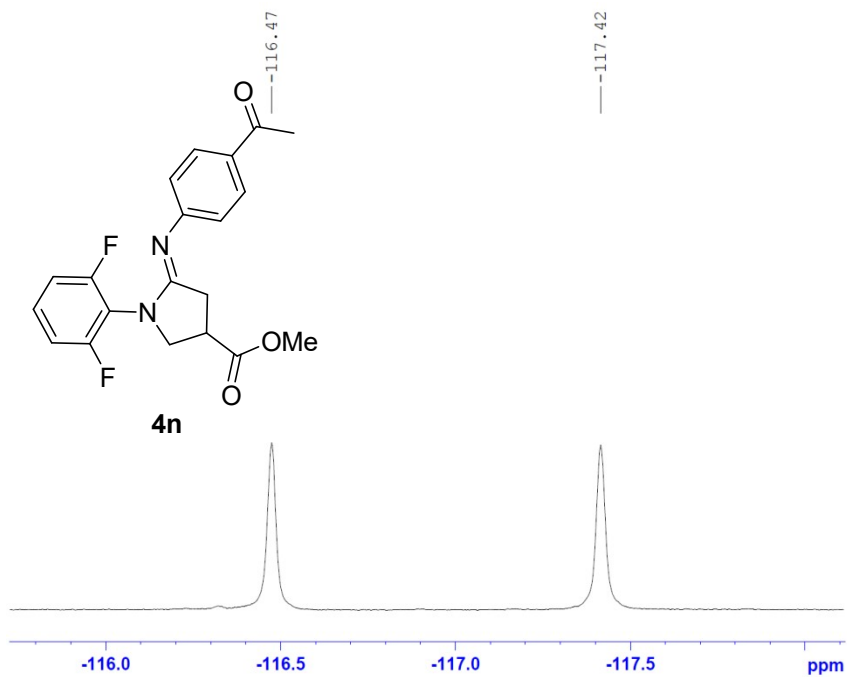

```

NAME          4n
EXPNO         7
PROCNO        1
Date_         20190124
Time         13.18
INSTRUM       spect
PROBHD        5 mm PABBO BB-
PULPROG       zgfhiggn
TD            524288
SOLVENT       CDCl3
NS            32
DS            4
SWH           75187.969 Hz
FIDRES        0.143410 Hz
AQ            3.4865651 sec
RG            4096
DW            6.650 usec
DE            6.50 usec
TE            300.0 K
D1            1.00000000 sec
D11           0.03000000 sec
D12           0.00002000 sec
TD0           1
  
```

```

===== CHANNEL f1 =====
NUC1          13C
P1            15.00 usec
PL1           3.21 dB
SFO1          376.4682462 MHz
  
```

```

===== CHANNEL f2 =====
CPDPRG2       waltz16
NUC2          1H
PCPD2         80.00 usec
PL2           0.00 dB
PL12          13.71 dB
PL2W          15.07131863 W
PL12W         0.64143294 W
SFO2          400.1316005 MHz
SI            65536
SF            376.4985589 MHz
WDW           EM
SSB           0
LB            0.30 Hz
GB            0
PC            1.00
  
```

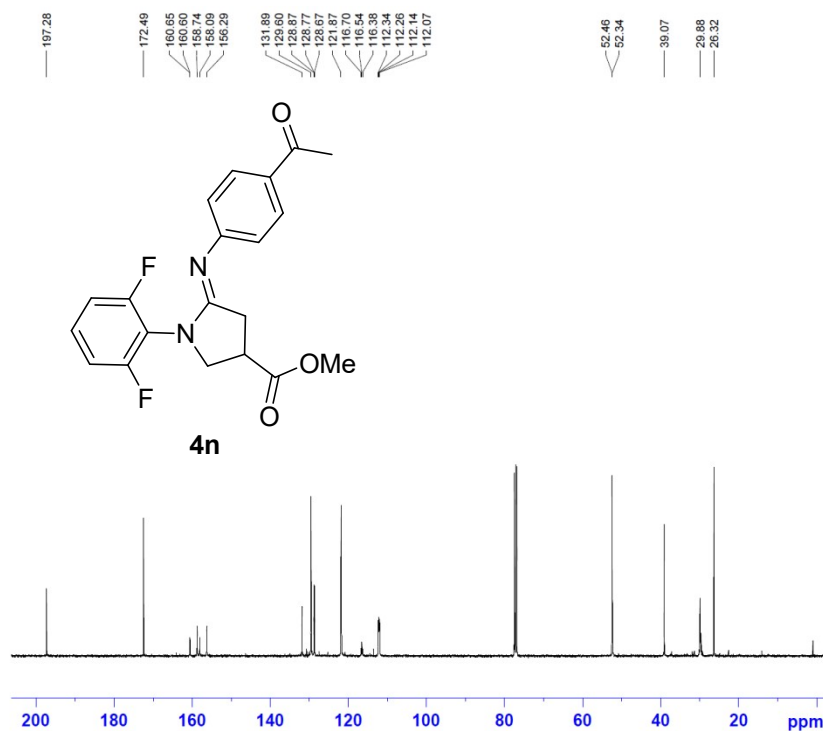

```

NAME          4n
EXPNO         5
PROCNO        1
Date_         20190413
Time         11.26
INSTRUM       spect
PROBHD        5 mm PABBO BB-
PULPROG       zgpg30
TD            65536
SOLVENT       CDCl3
NS            1024
DS            4
SWH           23980.814 Hz
FIDRES        0.365918 Hz
AQ            1.3664756 sec
RG            11585.2
DW            20.850 usec
DE            6.50 usec
TE            300.0 K
D1            2.00000000 sec
D11           0.03000000 sec
TD0           1
  
```

```

===== CHANNEL f1 =====
NUC1          13C
P1            24.00 usec
PL1           -2.00 dB
PL1W          59.71607590 W
SFO1          100.6238364 MHz
  
```

```

===== CHANNEL f2 =====
CPDPRG2       waltz16
NUC2          1H
PCPD2         80.00 usec
PL2           0.00 dB
PL12          13.71 dB
PL13          18.00 dB
PL2W          15.07131863 W
PL12W         0.64143294 W
PL13W         0.23886430 W
SFO2          400.1316005 MHz
SI            32768
SF            100.6127678 MHz
WDW           EM
SSB           0
LB            1.00 Hz
GB            0
PC            1.40
  
```

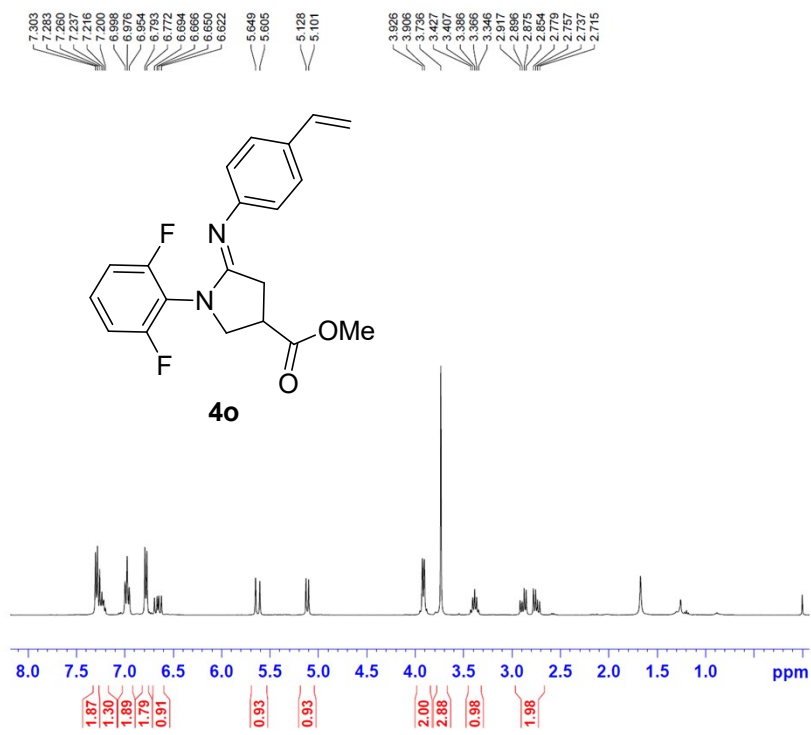

```

NAME          4o
EXPNO         1
PROCNO        1
Date_         20190320
Time          17.53
INSTRUM       spect
PROBHD        5 mm FAPBO BB-
PULPROG       zg30
TD            65536
SOLVENT       CDCl3
NS            16
DS            2
SWH           8278.146 Hz
FIDRES        0.126314 Hz
AQ            3.9584243 sec
RG            114
DW            60.400 usec
DE            6.50 usec
TE            300.0 K
D1            1.00000000 sec
D10           1
===== CHANNEL f1 =====
NUC1          1H
P1            16.50 usec
PL1           0.00 dB
PL1W          15.07131863 W
SFO1          400.1324710 MHz
SI            32768
SF            400.1300097 MHz
WDW           EM
SSB           0
LB            0.30 Hz
GB            0
PC            1.00

```

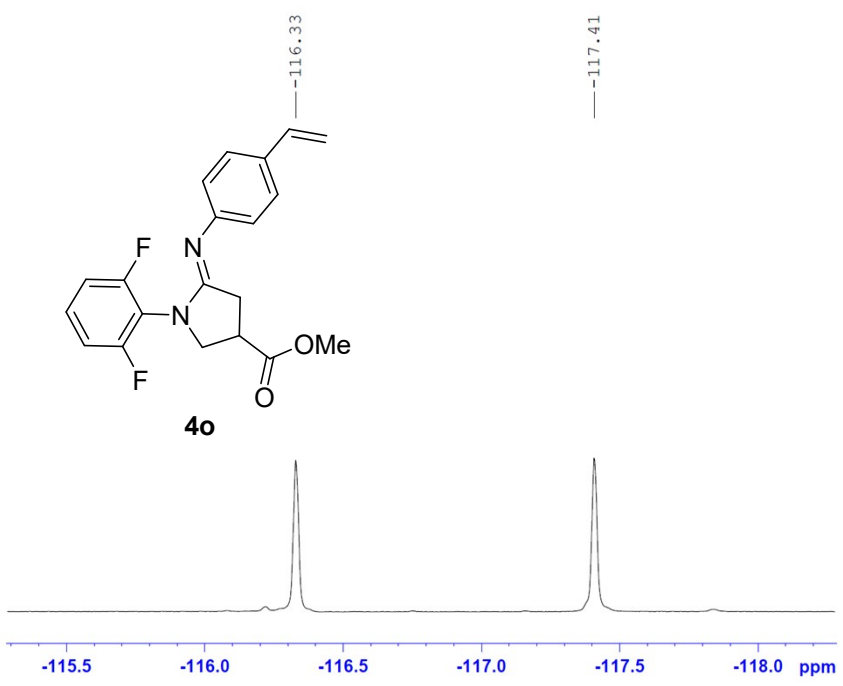

```

NAME          4o
EXPNO         7
PROCNO        1
Date_         20190320
Time          18.00
INSTRUM       spect
PROBHD        5 mm FAPBO BB-
PULPROG       zgfhiggn
TD            524288
SOLVENT       CDCl3
NS            32
DS            4
SWH           75187.969 Hz
FIDRES        0.143410 Hz
AQ            3.4865651 sec
RG            4096
DW            6.650 usec
DE            6.50 usec
TE            300.0 K
D1            1.00000000 sec
D11           0.03000000 sec
D12           0.00002000 sec
D10           1
===== CHANNEL f1 =====
NUC1          13C
P1            15.00 usec
PL1           3.21 dB
SFO1          376.4682462 MHz
===== CHANNEL f2 =====
CPDPRG2       waltz16
NUC2          1H
PCPD2         80.00 usec
PL2           0.00 dB
PL2W          13.71 dB
PL1W          15.07131863 W
PL12W         0.64143294 W
SFO2          400.1316005 MHz
SI            65536
SF            376.4985624 MHz
WDW           EM
SSB           0
LB            0.30 Hz
GB            0
PC            1.00

```

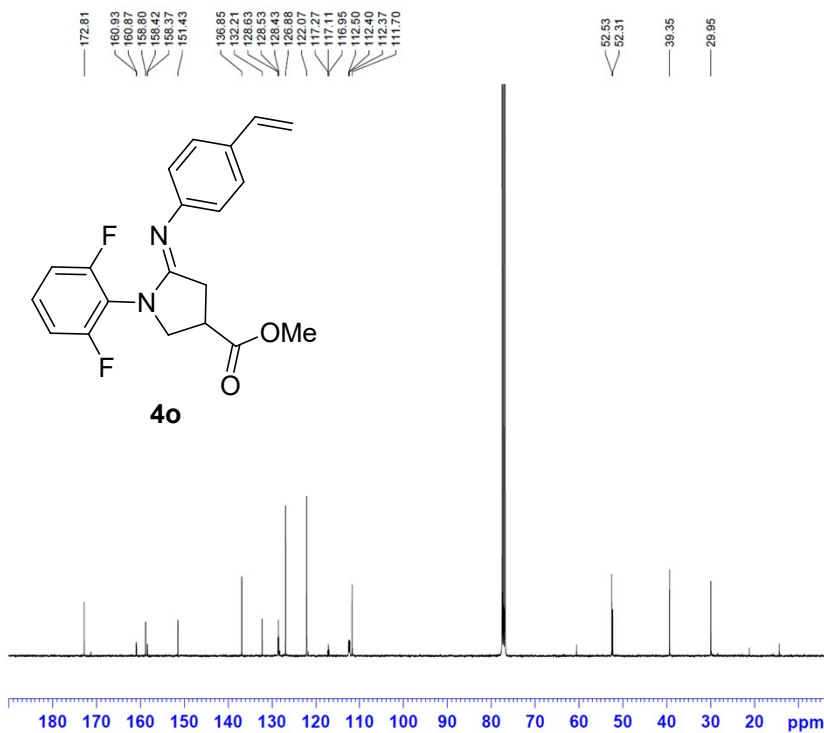

```

NAME          4o
EXPNO         1
PROCNO        1
Date_         20190406
Time_         10.52
INSTRUM       spect
PROBHD        5 mm FAPBO BB-
PULPROG       zgpg30
TD            65536
SOLVENT       CDCl3
NS            5120
DS            4
SWH           23980.814 Hz
FIDRES        0.365918 Hz
AQ            1.3664756 sec
RG            9195.2
DW            20.850 usec
DE            6.50 usec
TE            300.0 K
D1            2.00000000 sec
D11           0.03000000 sec
TD0           1
  
```

```

===== CHANNEL f1 =====
NUC1          13C
P1            24.00 usec
PL1           -2.00 dB
PL1W          59.71607590 W
SFO1          100.6230364 MHz
  
```

```

===== CHANNEL f2 =====
CPDPRG2       waltz16
NUC2          1H
PCPD2         80.00 usec
PL2           0.00 dB
PL12          13.71 dB
PL13          18.00 dB
PLW           15.07131863 W
PL12W         0.64143094 W
PL13W         0.23886430 W
SFO2          400.1316005 MHz
SI            32768
SF            100.6127539 MHz
WDW           EM
SSB           0
LB            1.00 Hz
GB            0
PC            1.40
  
```

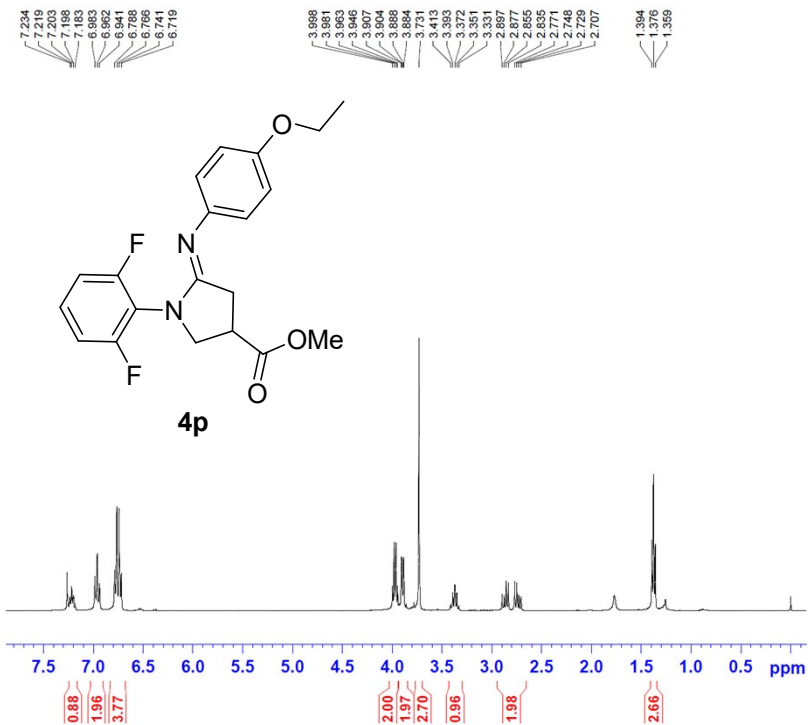

```

NAME          4p
EXPNO         1
PROCNO        1
Date_         20190320
Time_         18.09
INSTRUM       spect
PROBHD        5 mm FAPBO BB-
PULPROG       zg30
TD            65536
SOLVENT       CDCl3
NS            16
DS            2
SWH           8278.146 Hz
FIDRES        0.126314 Hz
AQ            3.9584243 sec
RG            90.5
DW            60.400 usec
DE            6.50 usec
TE            300.0 K
D1            1.00000000 sec
TD0           1
  
```

```

===== CHANNEL f1 =====
NUC1          1H
P1            16.50 usec
PL1           0.00 dB
PL1W          15.07131863 W
SFO1          400.1324710 MHz
SI            32768
SF            400.1300095 MHz
WDW           EM
SSB           0
LB            0.30 Hz
GB            0
PC            1.00
  
```

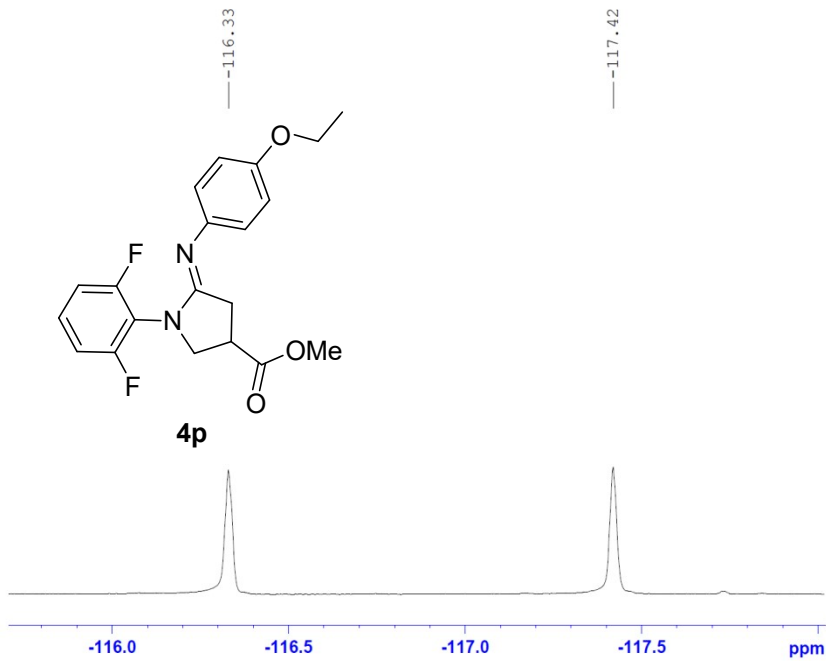

```

NAME          4p
EXPNO         1
PROCNO        1
Date_         20190320
Time_         18.15
INSTRUM       spect
PROBHD        5 mm PABBO BB-
PULPROG       zgpg30
TD            524288
SOLVENT       CDCl3
NS            32
DS            4
SWH           75187.969 Hz
FIDRES        0.143410 Hz
AQ            3.4865651 sec
RG            4096
LW            6.450 usec
DE            6.50 usec
TE            300.0 K
D1            1.00000000 sec
D11           0.03000000 sec
D12           0.00002000 sec
TD0           1
  
```

```

===== CHANNEL f1 =====
NUC1          19F
P1            15.00 usec
PL1           3.21 dB
SFO1         376.4682462 MHz
  
```

```

===== CHANNEL f2 =====
CPDPRG2      waltz16
NUC2          1H
PCPD2        80.00 usec
PL2           0.00 dB
PL12         13.71 dB
PL2W         15.07131863 W
PL12W        0.64143294 W
SFO2         400.1316005 MHz
SI            65536
SF           376.4985607 MHz
WDW           EM
SSB           0
LB            0.30 Hz
GB            0
PC            1.00
  
```

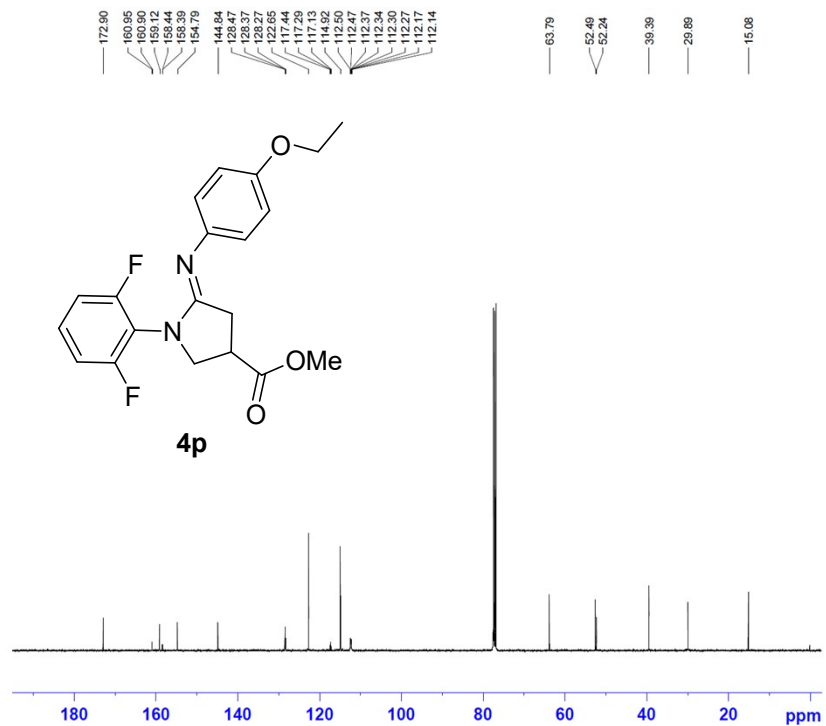

```

NAME          4p
EXPNO         5
PROCNO        1
Date_         20190404
Time_         23.48
INSTRUM       spect
PROBHD        5 mm PABBO BB-
PULPROG       zgpg30
TD            65536
SOLVENT       CDCl3
NS            2560
DS            4
SWH           23980.814 Hz
FIDRES        0.365918 Hz
AQ            1.3664756 sec
RG            5792.6
LW            20.850 usec
DE            6.50 usec
TE            300.0 K
D1            2.00000000 sec
D11           0.03000000 sec
TD0           1
  
```

```

===== CHANNEL f1 =====
NUC1          13C
P1            24.00 usec
PL1           -2.00 dB
PL1W         59.71607590 W
SFO1         100.6238364 MHz
  
```

```

===== CHANNEL f2 =====
CPDPRG2      waltz16
NUC2          1H
PCPD2        80.00 usec
PL2           0.00 dB
PL12         13.71 dB
PL13         18.00 dB
PL2W         15.07131863 W
PL12W        0.64143294 W
PL13W        0.23886430 W
SFO2         400.1316005 MHz
SI            32768
SF           100.6127543 MHz
WDW           EM
SSB           0
LB            1.00 Hz
GB            0
PC            1.40
  
```



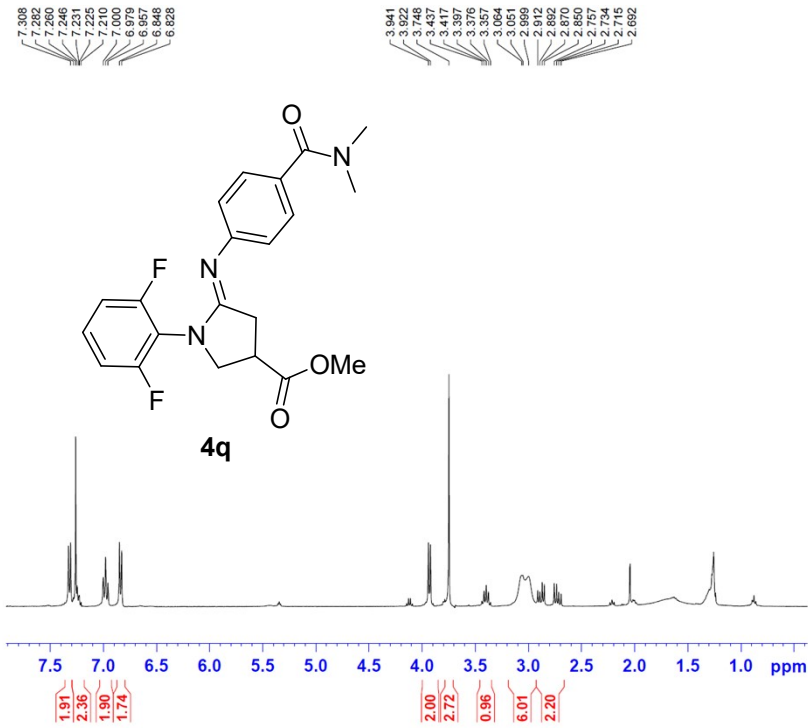

```

NAME          4q
EXPNO         1
PROCNO        1
Date_         20181228
Time         17.45
INSTRUM       spect
PROBHD        5 mm PABBO BB-
PULPROG       zg30
TD            65536
SOLVENT       CDCl3
NS            16
DS            2
SWH           8278.146 Hz
FIDRES        0.126314 Hz
AQ            3.9584243 sec
RG            256
DW            60.400 usec
DE            6.50 usec
TE            300.0 K
D1            1.00000000 sec
D10           1

```

```

===== CHANNEL f1 =====
NUC1          1H
P1            16.50 usec
PL1           0.00 dB
PL12          15.07131863 W
SFO1          400.1324710 MHz
SI            32768
SF            400.1300098 MHz
WDW           EM
SSB           0
LB            0.30 Hz
GB            0
PC            1.00

```

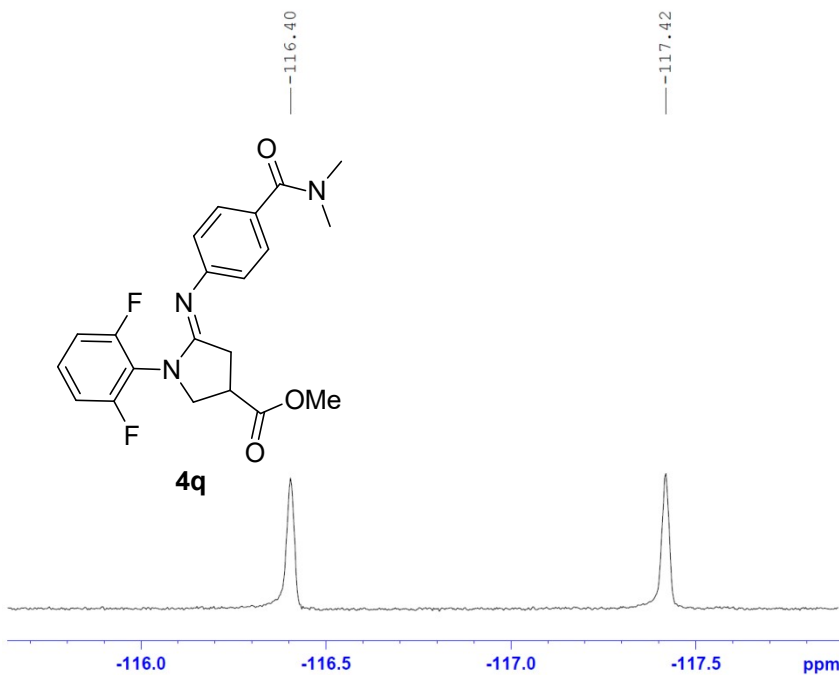

```

NAME          4q
EXPNO         7
PROCNO        1
Date_         20190104
Time         9.06
INSTRUM       spect
PROBHD        5 mm PABBO BB-
PULPROG       zgfhggm
TD            524288
SOLVENT       CDCl3
NS            32
DS            4
SWH           75187.969 Hz
FIDRES        0.143410 Hz
AQ            3.4865651 sec
RG            6502
DW            6.650 usec
DE            6.50 usec
TE            300.0 K
D1            1.00000000 sec
D11           0.03000000 sec
D12           0.00002000 sec
D10           1

```

```

===== CHANNEL f1 =====
NUC1          13C
P1            15.00 usec
PL1           3.21 dB
SFO1          376.4682462 MHz

```

```

===== CHANNEL f2 =====
CPDPRG2       waltz16
NUC2          1H
PCPD2         80.00 usec
PL2           0.00 dB
PL12          13.71 dB
PL12W         15.07131863 W
SFO2          400.1316005 MHz
SI            65536
SF            376.4985601 MHz
WDW           EM
SSB           0
LB            0.30 Hz
GB            0
PC            1.00

```

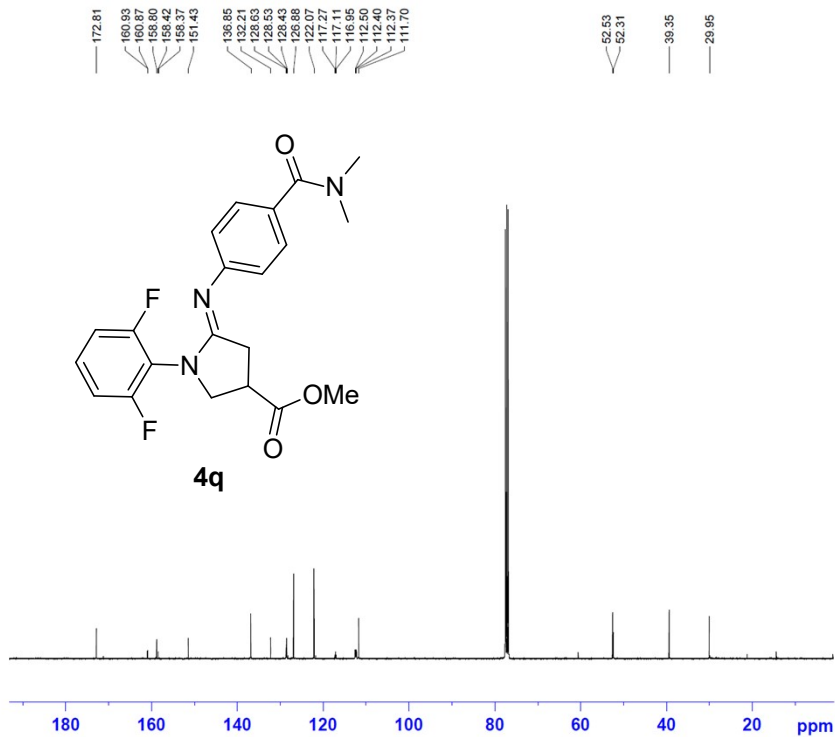

```

NAME          4q
EXPNO         5
PROCNO        1
Date_         20190406
Time          10.52
INSTRUM       spect
PROBHD        5 mm PABBO BB-
PULPROG       zgpg30
TD            65536
SOLVENT       CDCl3
NS            5120
DS            4
SWH           23980.814 Hz
FIDRES        0.365918 Hz
AQ            1.3664756 sec
RG            9195.2
DW            20.850 usec
DE            6.50 usec
TE            300.0 K
D1            2.00000000 sec
D11           0.03000000 sec
TD0           1

===== CHANNEL f1 =====
NUC1          13C
P1            24.00 usec
PL1           -2.00 dB
PL1W         59.71607590 W
SF01         100.6238364 MHz

===== CHANNEL f2 =====
CPDPRG2      waltz16
NUC2          1H
PCPD2        80.00 usec
PL2           0.00 dB
PL12         13.71 dB
PL13         18.00 dB
PL2W         15.07131863 W
PL12W        0.64143294 W
PL13W        0.23886430 W
SF02         400.1316005 MHz
SI            32768
SF           100.61275390 MHz
WDW           EM
SSB           0
LB            1.00 Hz
GB            0
PC            1.40
  
```

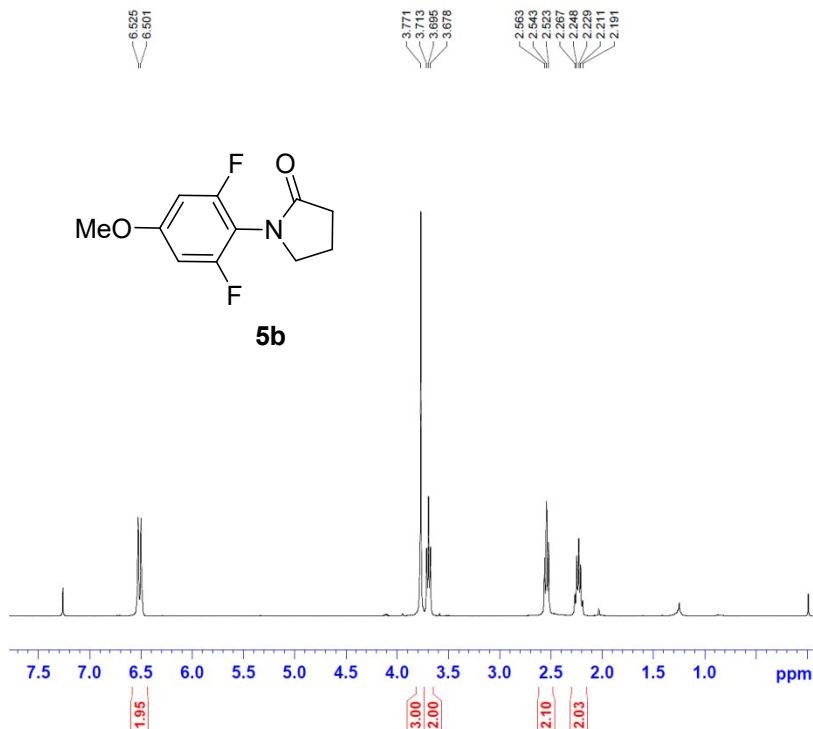

```

NAME          5b
EXPNO         1
PROCNO        1
Date_         20160428
Time          9.32
INSTRUM       spect
PROBHD        5 mm PABBO BB-
PULPROG       zg30
TD            65536
SOLVENT       CDCl3
NS            16
DS            2
SWH           8278.146 Hz
FIDRES        0.126314 Hz
AQ            3.9584243 sec
RG            114
DW            60.400 usec
DE            6.50 usec
TE            300.0 K
D1            1.00000000 sec
TD0           1

===== CHANNEL f1 =====
NUC1          1H
P1            16.25 usec
PL1           0.00 dB
PL1W         15.07131863 W
SF01         400.1324710 MHz
SI            32768
SF           400.1300090 MHz
WDW           EM
SSB           0
LB            0.30 Hz
GB            0
PC            1.00
  
```

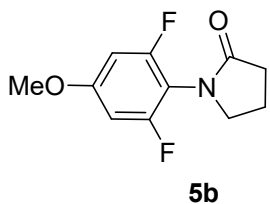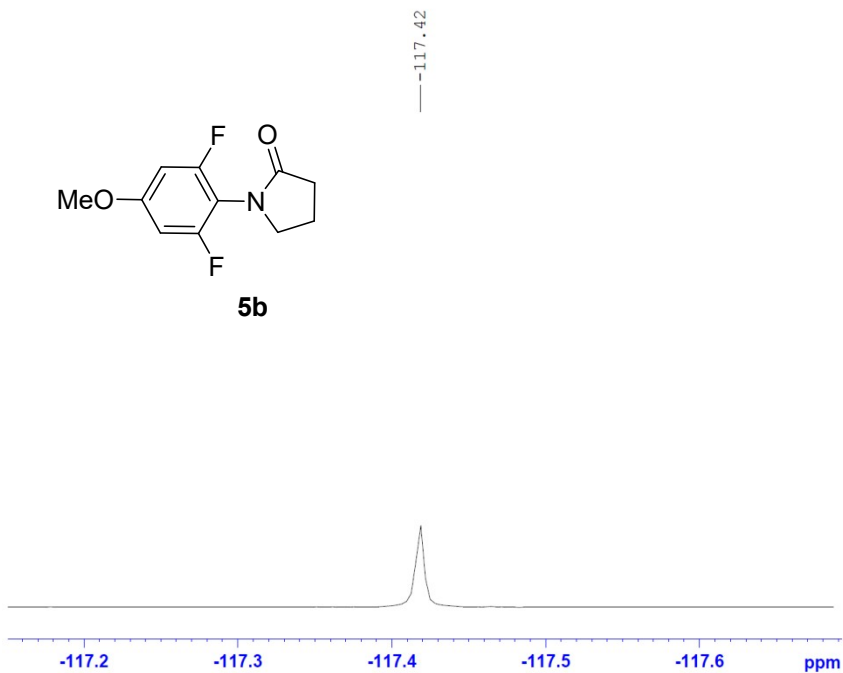

```

NAME          5b
EXPNO         7
PROCNO        1
Date_         20161227
Time          10.05
INSTRUM       spect
PROBHD        5 mm PABBO BB-
PULPROG       zgfhggn
TD            131072
SOLVENT       CDC13
NS            32
DS            4
SWH           75187.969 Hz
FIDRES        0.573639 Hz
AQ            0.8716788 sec
RG            1625.5
DW            6.650 usec
DE            6.50 usec
TE            300.0 K
D1            1.00000000 sec
D11           0.03000000 sec
D12           0.00002000 sec
TD0           1
  
```

```

===== CHANNEL f1 =====
NUC1          19F
P1            15.00 usec
PL1           3.21 dB
SFO1          376.4682462 MHz
  
```

```

===== CHANNEL f2 =====
CPDPRG2       waltz16
NUC2          1H
PCPD2         80.00 usec
PL2           0.00 dB
PL12          13.84 dB
PL2W          15.07131863 W
PL12W         0.62251705 W
SFO2          400.1316005 MHz
SI            65536
SF            376.4985475 MHz
WDW           EM
SSB           0
LB            0.30 Hz
GB            0
PC            1.00
  
```

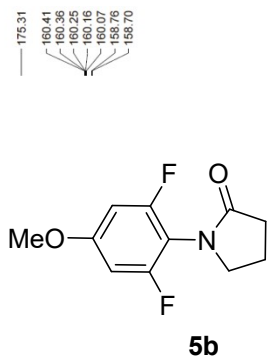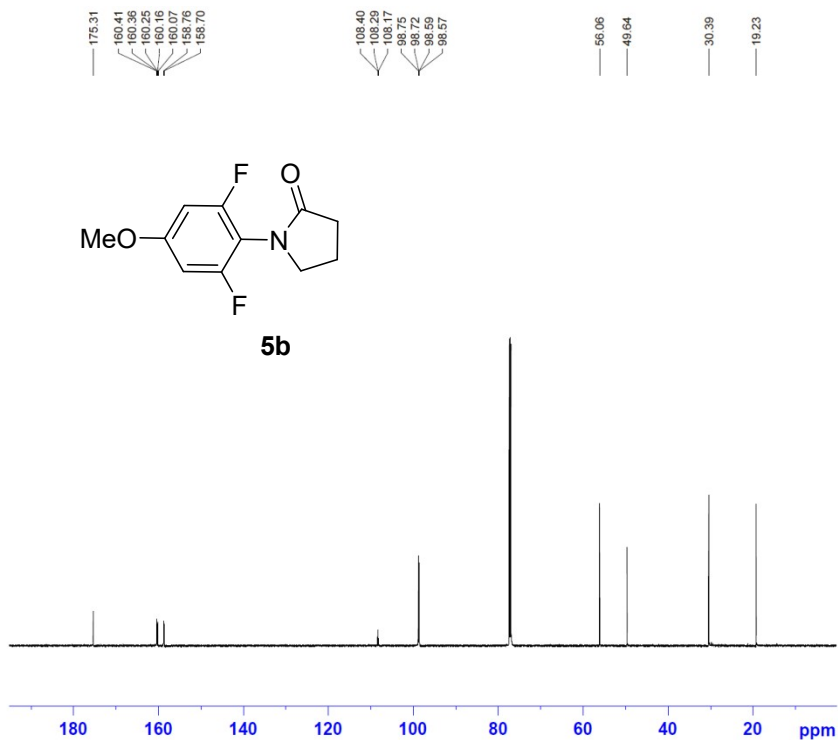

```

NAME          5b
EXPNO         5
PROCNO        1
Date_         20160428
Time          17.20
INSTRUM       spect
PROBHD        5 mm CPTCI 1H-
PULPROG       zgpg30
TD            65536
SOLVENT       CDC13
NS            100
DS            4
SWH           36057.691 Hz
FIDRES        0.550197 Hz
AQ            0.9088159 sec
RG            107.97
DW            13.867 usec
DE            18.00 usec
TE            298.2 K
D1            2.00000000 sec
D11           0.03000000 sec
TD0           1
  
```

```

===== CHANNEL f1 =====
SFO1          150.9068340 MHz
NUC1          13C
P1            12.00 usec
SI            32768
SF            150.8902203 MHz
WDW           EM
SSB           0
LB            1.00 Hz
GB            0
PC            1.40
  
```

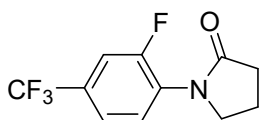

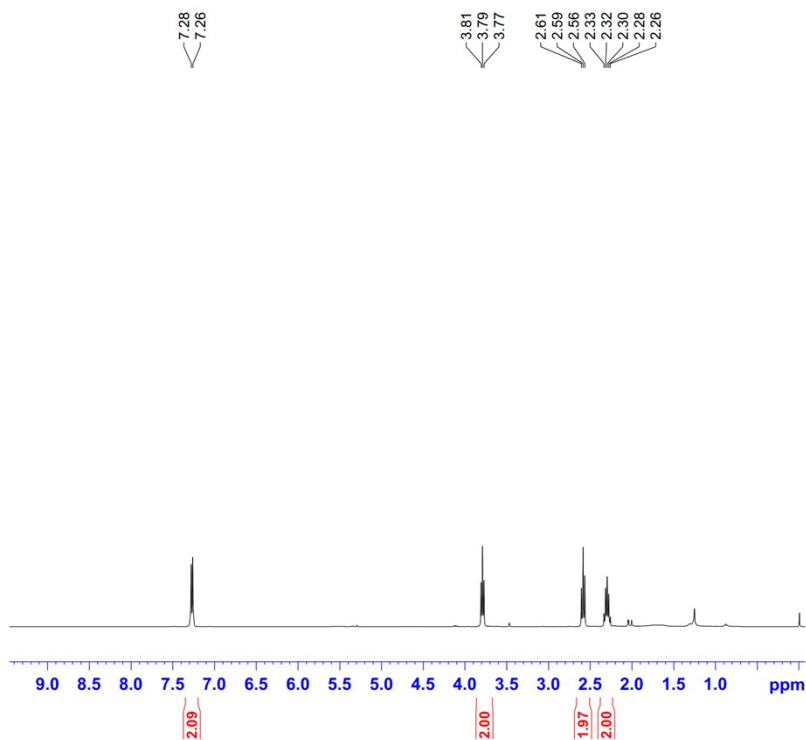

```

NAME      JOCamide 5c
EXPNO     1
PROCNO    1
Date_     20180930
Time      12.40
INSTRUM   spect
PROBHD    5 mm PABBO BB-
PULPROG   zg30
TD         65536
SOLVENT   CDCl3
NS         16
DS         2
SWH        8278.146 Hz
FIDRES     0.126314 Hz
AQ         3.9584243 sec
RG         161.3
DW         60.400 usec
DE         6.50 usec
TE         300.0 K
D1         1.00000000 sec
TD0        1

===== CHANNEL f1 =====
NUC1      1H
P1        16.50 usec
PL1       0.00 dB
PL1W      15.07131863 W
SFO1      400.1324710 MHz
SI        32768
SF        400.1300080 MHz
WDW       EM
SSB       0
LB        0.30 Hz
GB        0
PC        1.00
  
```

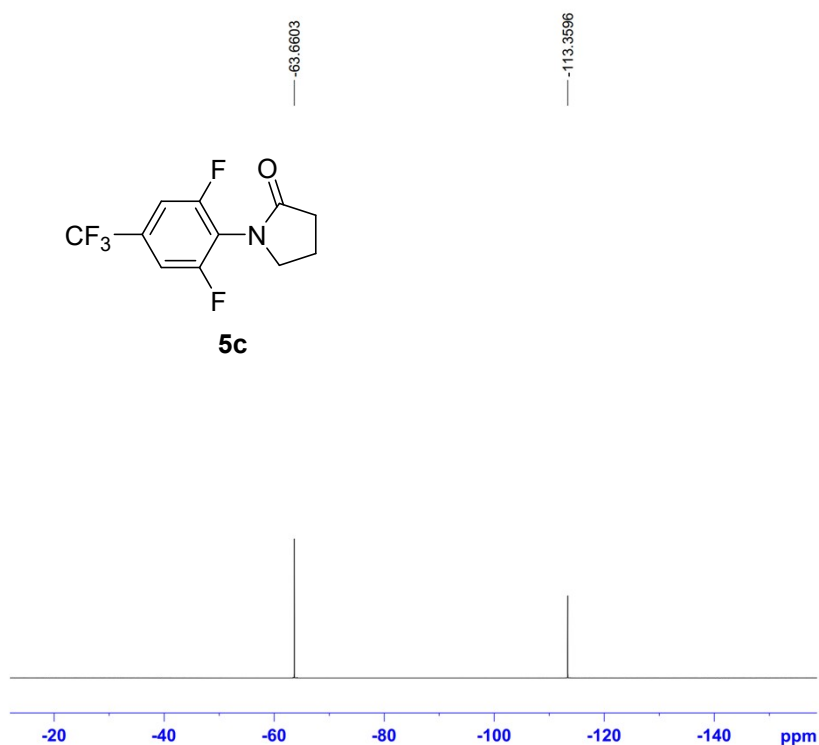

```

NAME      JOCamide 5c
EXPNO     7
PROCNO    1
Date_     20181102
Time      17.51
INSTRUM   spect
PROBHD    5 mm PABBO BB-
PULPROG   zgfhigqn
TD         524288
SOLVENT   CDCl3
NS         32
DS         4
SWH        75187.969 Hz
FIDRES     0.143410 Hz
AQ         3.4865651 sec
RG         1290.2
DW         6.650 usec
DE         6.50 usec
TE         300.0 K
D1         1.00000000 sec
D11        0.03000000 sec
D12        0.00002000 sec
TD0        1

===== CHANNEL f1 =====
NUC1      19F
P1        15.00 usec
PL1       3.21 dB
SFO1      376.4682461 MHz

===== CHANNEL f2 =====
CPDPRG2   waltz16
NUC2      1H
PCPD2     80.00 usec
PL2       0.00 dB
PL12      13.71 dB
PL2W      15.07131863 W
PL12W     0.64143294 W
SFO2      400.1316005 MHz
SI        65536
SF        376.4985479 MHz
WDW       EM
SSB       0
LB        0.30 Hz
GB        0
PC        1.00
  
```

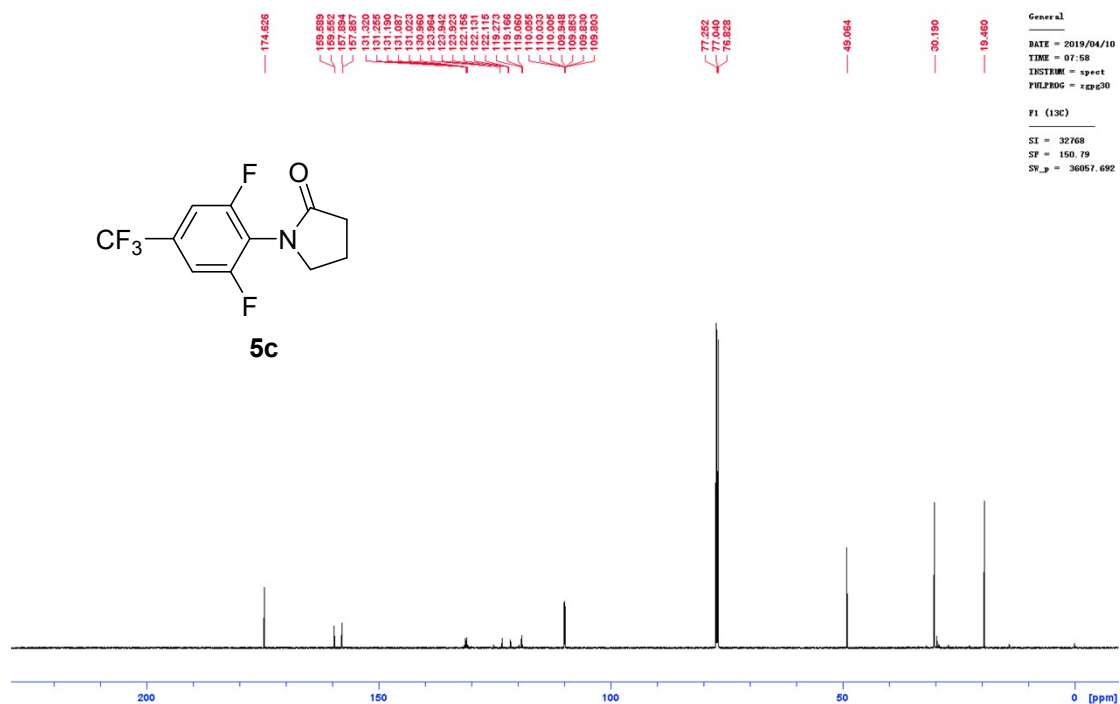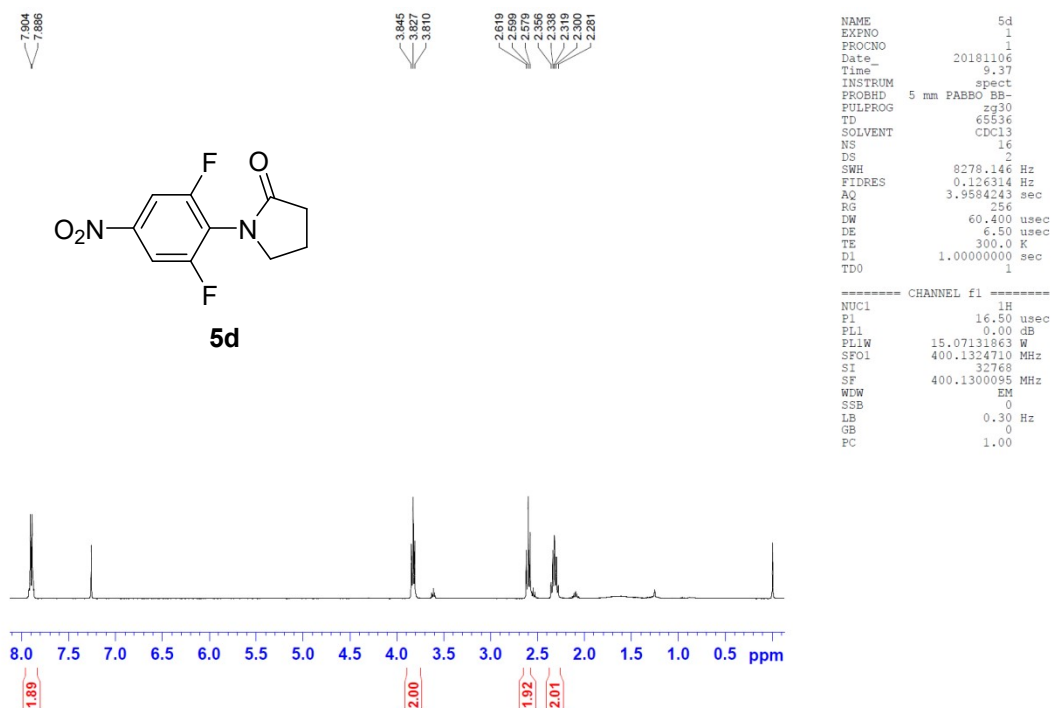

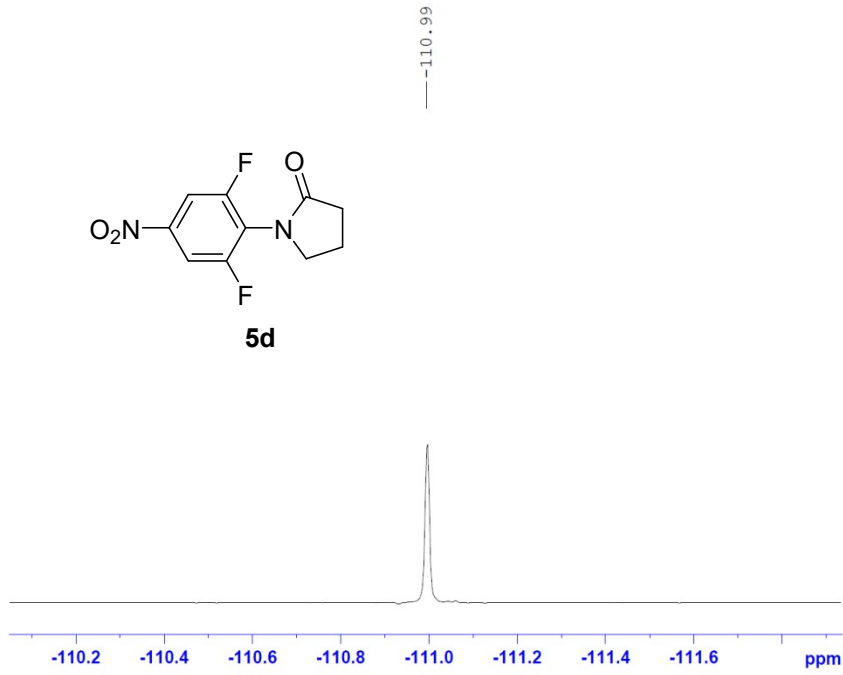

```

NAME          5d
EXPNO         7
PROCNO        1
Date_         20181106
Time          9.41
INSTRUM       spect
PROBHD        5 mm PABBO BB-
PULPROG       zgfhqgn
TD            131072
SOLVENT       CDCl3
NS            32
DS            4
SWH           75187.969 Hz
FIDRES        0.573639 Hz
AQ            0.8716788 sec
RG            4096
DW            6.650 usec
DE            6.50 usec
TE            300.0 K
D1            1.00000000 sec
D11           0.03000000 sec
D12           0.00002000 sec
TD0           1

```

```

===== CHANNEL f1 =====
NUC1          19F
P1            15.00 usec
PL1           3.21 dB
SFO1          376.4682462 MHz

===== CHANNEL f2 =====
CPDPRG2       waltz16
NUC2          1H
PCPD2         80.00 usec
PL2           0.00 dB
PL12          13.71 dB
PL2W          15.07131863 W
PL12W         0.64143294 W
SFO2          400.1316005 MHz
SI            65536
SF            376.4985588 MHz
WDW           EM
SSB           0
LB            0.30 Hz
GB            0
PC            1.00

```

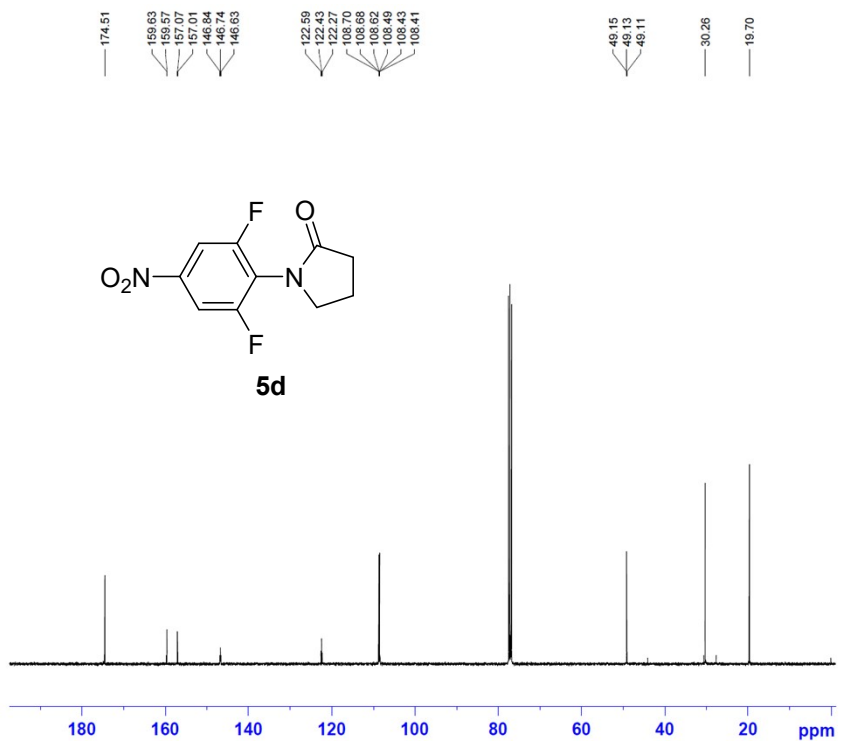

```

NAME          5d
EXPNO         5
PROCNO        1
Date_         20190414
Time          0.41
INSTRUM       spect
PROBHD        5 mm PABBO BB-
PULPROG       zgpg30
TD            65536
SOLVENT       CDCl3
NS            1536
DS            4
SWH           23980.814 Hz
FIDRES        0.365918 Hz
AQ            1.3664756 sec
RG            18390.4
DW            20.850 usec
DE            6.50 usec
TE            300.0 K
D1            2.00000000 sec
D11           0.03000000 sec
TD0           1

```

```

===== CHANNEL f1 =====
NUC1          13C
P1            24.00 usec
PL1           -2.00 dB
PL1W          59.71607590 W
SFO1          100.6238364 MHz

===== CHANNEL f2 =====
CPDPRG2       waltz16
NUC2          1H
PCPD2         80.00 usec
PL2           0.00 dB
PL12          13.71 dB
PL13          18.00 dB
PL2W          15.07131863 W
PL12W         0.64143294 W
PL13W         0.23886430 W
SFO2          400.1316005 MHz
SI            32768
SF            100.6127575 MHz
WDW           EM
SSB           0
LB            1.00 Hz
GB            0
PC            1.40

```

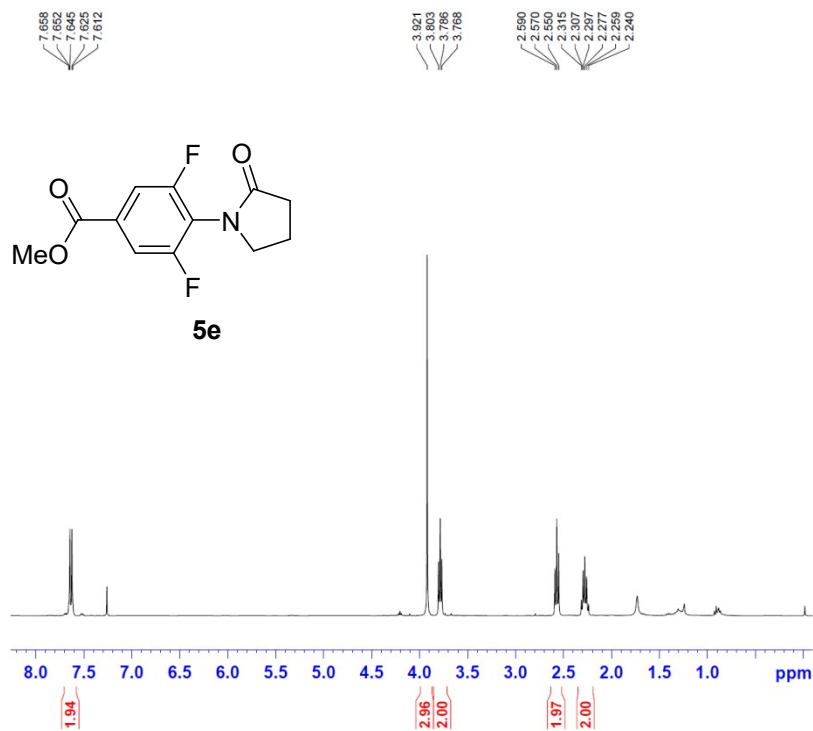

```

NAME          5c
EXPNO         1
PROCNO        1
Date_         20160512
Time          8.33
INSTRUM       spect
PROBHD        5 mm PABBO BB-
PULPROG       zg30
TD            65536
SOLVENT       CDCl3
NS            16
DS            2
SWH           8278.146 Hz
FIDRES        0.126314 Hz
AQ           3.9584243 sec
RG            128
DW           60.400 usec
DE           6.50 usec
TE            300.0 K
D1            1.00000000 sec
D10           1

```

```

===== CHANNEL f1 =====
NUC1          1H
P1            16.25 usec
PL1           0.00 dB
PL1W         15.07131863 W
SF01         400.1324710 MHz
SI            32768
SF           400.1300094 MHz
WFW          EM
SSB           0
LB            0.30 Hz
GB            0
PC            1.00

```

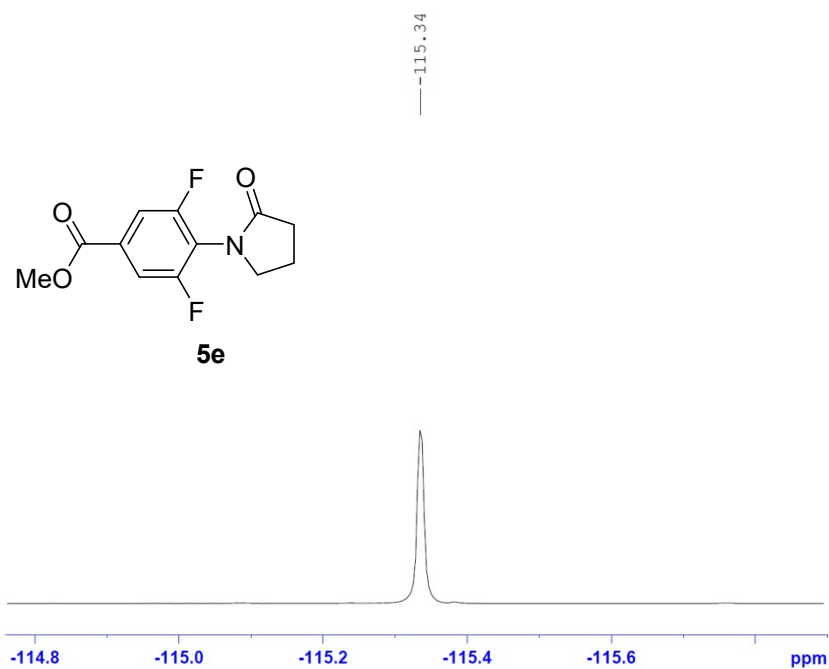

```

NAME          5c
EXPNO         7
PROCNO        1
Date_         20160525
Time          9.01
INSTRUM       spect
PROBHD        5 mm PABBO BB-
PULPROG       zgfhigqn
TD            131072
SOLVENT       CDCl3
NS            32
DS            4
SWH           75187.969 Hz
FIDRES        0.573639 Hz
AQ           0.8716788 sec
RG            1625.5
DW           6.650 usec
DE           6.50 usec
TE            300.0 K
D1            1.00000000 sec
D11           0.03000000 sec
D12           0.00002000 sec
D10           1

```

```

===== CHANNEL f1 =====
NUC1          13C
P1            15.00 usec
PL1           3.21 dB
PL1W         376.4682462 MHz
SF01         376.4682462 MHz

```

```

===== CHANNEL f2 =====
CPDPRG2       waltz16
NUC2          1H
PCPD2         80.00 usec
PL2           0.00 dB
PL12         13.94 dB
PL2W         15.07131863 W
PL12W        0.62251705 W
SF02         400.1316005 MHz
SI            65536
SF           376.4985417 MHz
WDW          EM
SSB           0
LB            0.30 Hz
GB            0
PC            1.00

```

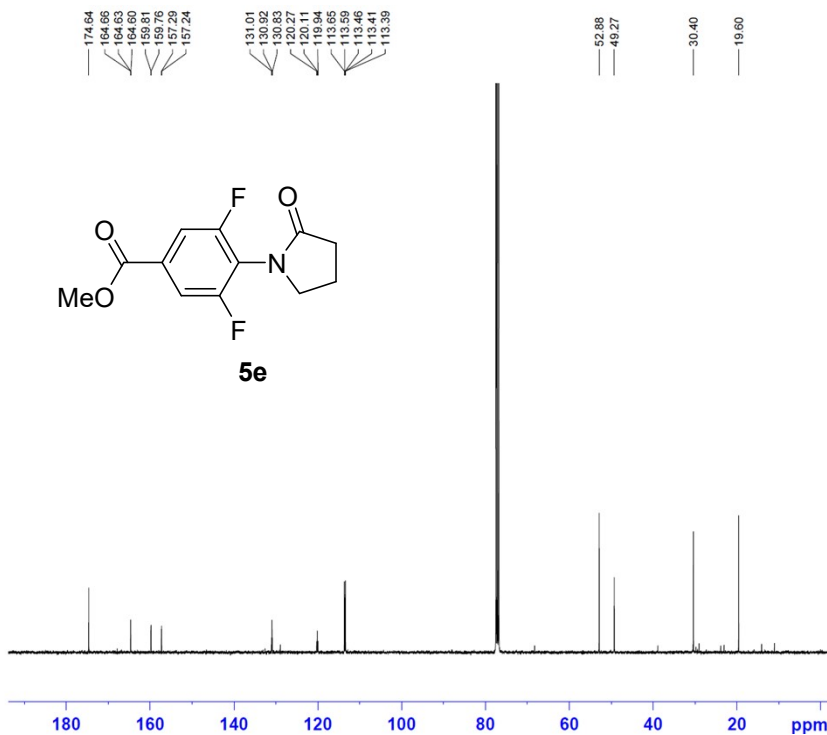

```

NAME          5c
EXPNO         1
PROCNO        1
Date_         20160512
Time_         18.02
INSTRUM       spect
PROBHD        5 mm PABBO BB-
PULPROG       zgpg30
TD            65536
SOLVENT       CDCl3
NS            2000
DS            4
SWH           23980.814 Hz
FIDRES        0.365918 Hz
AQ            1.3664756 sec
RG            9195.2
DW            20.850 usec
DE            6.50 usec
TE            300.0 K
D1            2.00000000 sec
D11           0.03000000 sec
TD0           1

===== CHANNEL f1 =====
NUC1          13C
P1            15.50 usec
PL1           -1.23 dB
PL1W          50.01395179 W
SF01          100.6238364 MHz

===== CHANNEL f2 =====
CPDPRG2       waltz16
NUC2          1H
PCPD2         80.00 usec
PL2           0.00 dB
PL12          13.84 dB
PL13          18.00 dB
PLW           15.07131863 W
PL12W         0.62251705 W
PL13W         0.23886430 W
SF02          400.1316005 MHz
SI            32768
SF            100.6127561 MHz
WDW           EM
SSB           0
LB            1.00 Hz
GB            0
FC            1.40

```

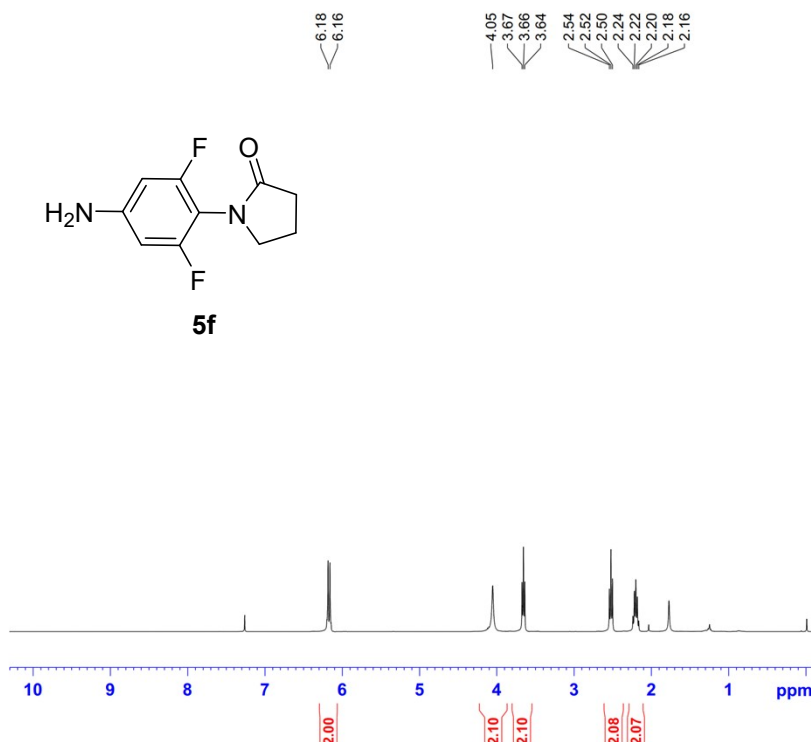

```

NAME          JOCamide 5f
EXPNO         1
PROCNO        1
Date_         20190531
Time_         10.54
INSTRUM       spect
PROBHD        5 mm PABBO BB-
PULPROG       zg30
TD            65536
SOLVENT       CDCl3
NS            16
DS            2
SWH           8278.146 Hz
FIDRES        0.126314 Hz
AQ            3.9584243 sec
RG            128
DW            60.400 usec
DE            6.50 usec
TE            300.0 K
D1            1.00000000 sec
TD0           1

===== CHANNEL f1 =====
NUC1          1H
P1            16.50 usec
PL1           0.00 dB
PL1W          15.07131863 W
SF01          400.1324710 MHz
SI            32768
SF            400.1300090 MHz
WDW           EM
SSB           0
LB            0.30 Hz
GB            0
FC            1.00

```



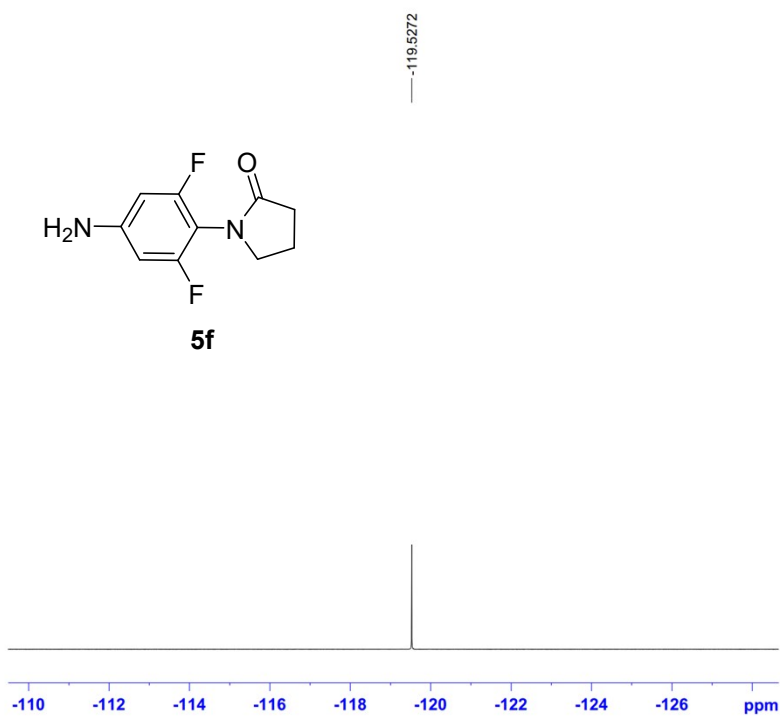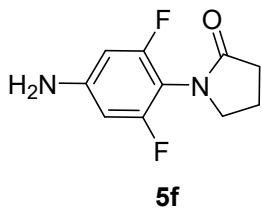

```

NAME      JOCamideine 5f
EXPNO    7
PROCNO    1
Date_     20190605
Time      13.04
INSTRUM   spect
PROBHD    5 mm PABBO BB-
PULPROG   zgfhigpn
TD         131072
SOLVENT   CDCl3
NS         32
DS         4
SWH        75187.969 Hz
FIDRES     0.573639 Hz
AQ         0.8716788 sec
RG         4096
DW         6.650 usec
DE         6.50 usec
TE         300.0 K
D1         1.00000000 sec
D11        0.03000000 sec
D12        0.00002000 sec
TD0        1

===== CHANNEL f1 =====
NUC1       13C
P1         15.00 usec
PL1        3.21 dB
SFO1       376.4682462 MHz

===== CHANNEL f2 =====
CPDPRG2    waltz16
NUC2        1H
PCPD2       80.00 usec
PL2         0.00 dB
PL12        13.71 dB
PL2W        15.07131863 W
PL12W       0.64143294 W
SFO2        400.1316005 MHz
SI          65536
SF          376.4985578 MHz
WDW         EM
SSB         0
LB          0.30 Hz
GB          0
FC          1.00

```

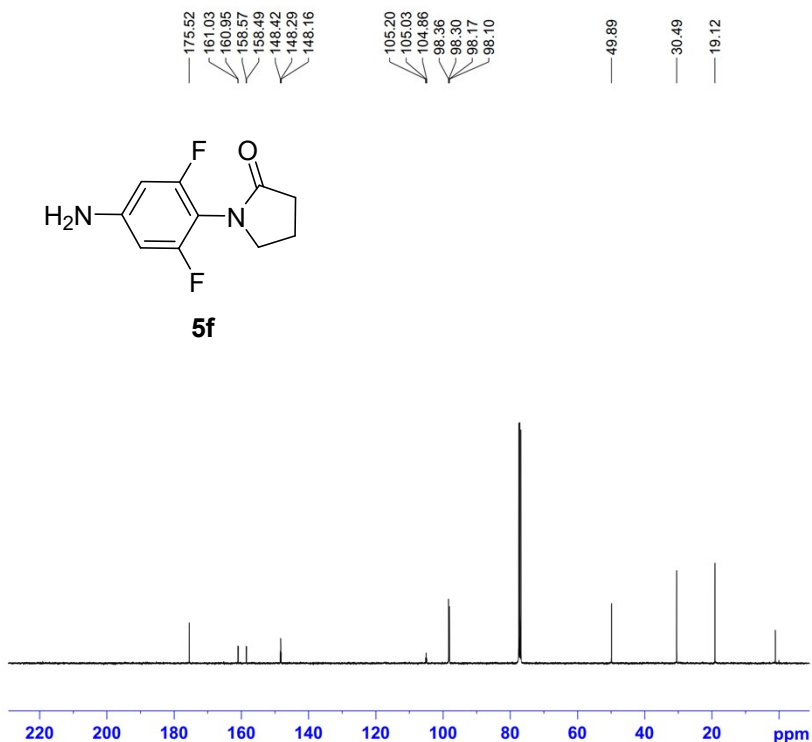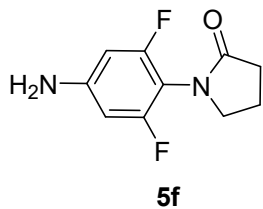

```

NAME      JOCamideine 5f
EXPNO    5
PROCNO    1
Date_     20190615
Time      7.20
INSTRUM   spect
PROBHD    5 mm PABBO BB-
PULPROG   zpgp30
TD         65536
SOLVENT   CDCl3
NS         1536
DS         4
SWH        23980.814 Hz
FIDRES     0.365918 Hz
AQ         1.3664756 sec
RG         13004
DW         20.850 usec
DE         6.50 usec
TE         300.0 K
D1         2.00000000 sec
D11        0.03000000 sec
TD0        1

===== CHANNEL f1 =====
NUC1       13C
P1         24.00 usec
PL1        -2.00 dB
PL1W       59.71607590 W
SFO1       100.6238364 MHz

===== CHANNEL f2 =====
CPDPRG2    waltz16
NUC2        1H
PCPD2       80.00 usec
PL2         0.00 dB
PL12        13.71 dB
PL13        18.00 dB
PL2W        15.07131863 W
PL12W       0.64143294 W
PL13W       0.23886430 W
SFO2        400.1316005 MHz
SI          32768
SF          100.6127553 MHz
WDW         EM
SSB         0
LB          1.00 Hz
GB          0
FC          1.40

```

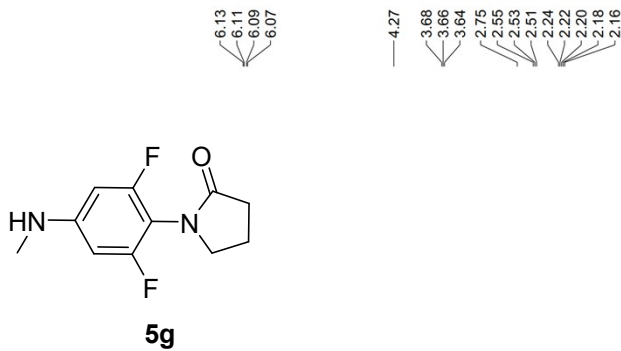

```

NAME      JOCamideine 5g
EXPNO    7
PROCNO    1
Date_     20190605
Time      17.54
INSTRUM   spect
PROBHD    5 mm PABBO BB-
PULPROG   zg30
TD         65536
SOLVENT   CDCl3
NS         16
DS         2
SWH        8278.146 Hz
FIDRES     0.126314 Hz
AQ         3.9584243 sec
RG         128
DW         60.400 usec
DE         6.50 usec
TE         300.0 K
D1         1.00000000 sec
D10       1
  
```

```

===== CHANNEL f1 =====
NUC1      1H
P1        16.50 usec
PL1       0.00 dB
PL1W      15.07131863 W
SF01      400.1324710 MHz
SI        32768
SF        400.1300090 MHz
WDW       EM
SSB       0
LB        0.30 Hz
GB        0
PC        1.00
  
```

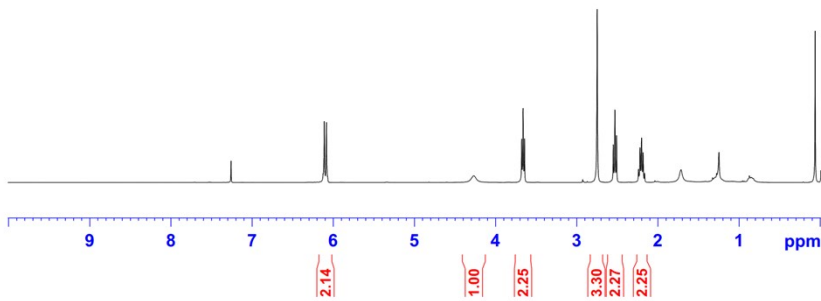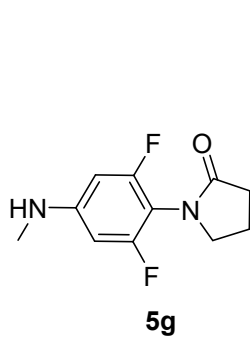

```

NAME      JOCamideine 5g
EXPNO    7
PROCNO    1
Date_     20190606
Time      16.45
INSTRUM   spect
PROBHD    5 mm PABBO BB-
PULPROG   zgfhigqn
TD         131072
SOLVENT   CDCl3
NS         32
DS         4
SWH        75187.969 Hz
FIDRES     0.573639 Hz
AQ         0.5716788 sec
RG         4096
DW         6.650 usec
DE         6.50 usec
TE         300.0 K
D1         1.00000000 sec
D11        0.03000000 sec
D12        0.00002000 sec
D10       1
  
```

```

===== CHANNEL f1 =====
NUC1      19F
P1        15.00 usec
PL1       3.21 dB
SF01      376.4682462 MHz

===== CHANNEL f2 =====
CPDPRG2   waltz16
NUC2      1H
PCPD2     80.00 usec
PL2       0.00 dB
PL12      13.71 dB
PL2W      15.07131863 W
PL12W     0.64143294 W
SFO2      400.1316005 MHz
SI        65536
SF        376.4985567 MHz
WDW       EM
SSB       0
LB        0.30 Hz
GB        0
PC        1.00
  
```

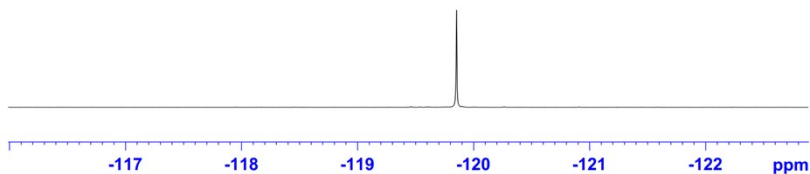

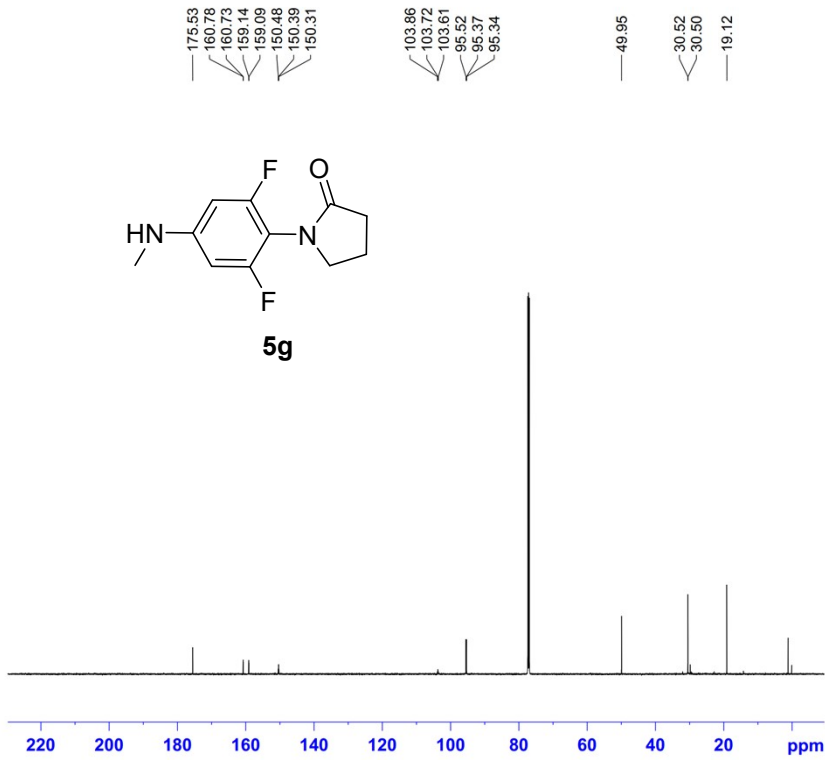

```

NAME      JOCamideine 5g
EXPNO    5
PROCNO   1
Date_    20190620
Time     10.58
INSTRUM  spect
PROBHD   5 mm PABBO BB/
PULPROG  zgpg30
TD       65536
SOLVENT  CDCl3
NS       1475
DS       4
SWH      36057.691 Hz
FIDRES   0.550197 Hz
AQ       0.9088159 sec
RG       192.21
DW       13.867 usec
DE       6.50 usec
TE       299.8 K
D1       2.0000000 sec
D11      0.0300000 sec
TD0      1

===== CHANNEL f1 =====
SFO1    150.8062408 MHz
NUC1     13C
P1       11.00 usec
SI       32768
SF       150.7896370 MHz
WDW      EM
SSB      0
LB       1.00 Hz
GB       0
PC       1.40
  
```

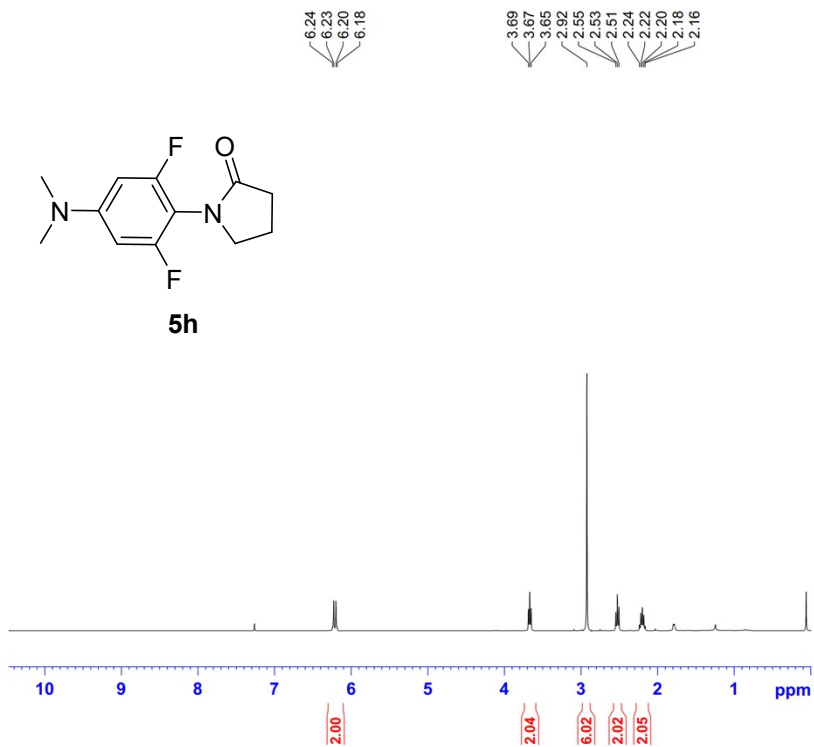

```

NAME      JOCamideine 5h
EXPNO    1
PROCNO   1
Date_    20190605
Time     13.10
INSTRUM  spect
PROBHD   5 mm PABBO BB-
PULPROG  zg30
TD       65536
SOLVENT  CDCl3
NS       16
DS       2
SWH      8278.146 Hz
FIDRES   0.126314 Hz
AQ       3.9584243 sec
RG       90.5
DW       60.400 usec
DE       6.50 usec
TE       300.0 K
D1       1.0000000 sec
TD0      1

===== CHANNEL f1 =====
NUC1     1H
P1       16.50 usec
PL1      0.00 dB
PL1W     15.07131863 W
SFO1    400.1324710 MHz
SI       32768
SF       400.1300090 MHz
WDW      EM
SSB      0
LB       0.30 Hz
GB       0
PC       1.00
  
```

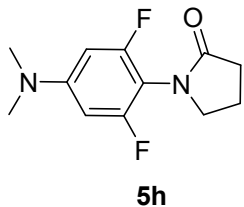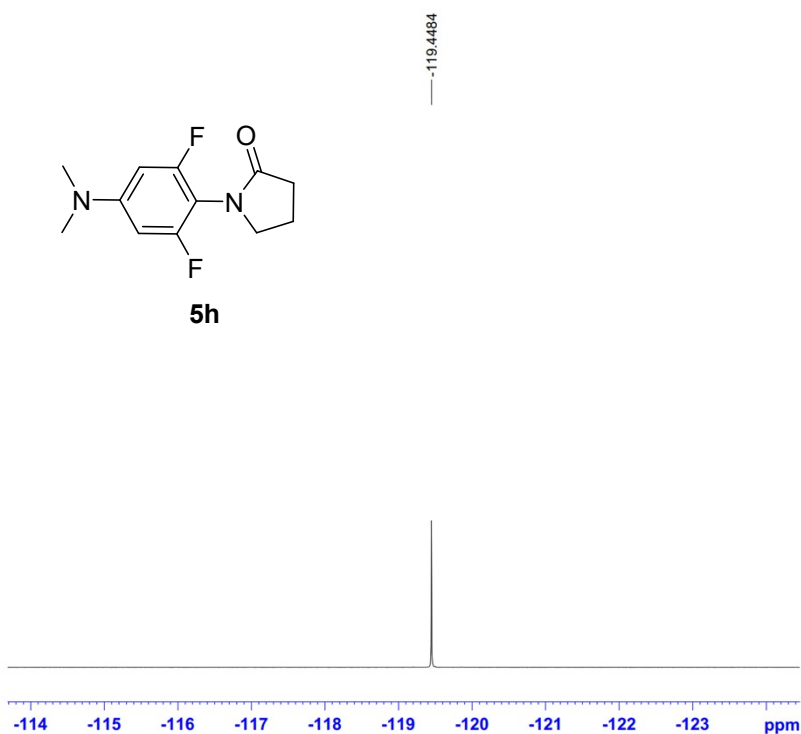

```

NAME      JOCamideine 5h
EXPNO     7
PROCNO    1
Date_     20190605
Time      17.28
INSTRUM   spect
PROBHD    5 mm PABBO BB-
PULPROG   zgfhiggn
TD         131072
SOLVENT   CDCl3
NS         32
DS         4
SWH        75187.969 Hz
FIDRES     0.573639 Hz
AQ         0.8716788 sec
RG         4096
DW         6.650 usec
DE         6.50 usec
TE         300.0 K
D1         1.00000000 sec
D11        0.03000000 sec
D12        0.00002000 sec
TD0        1
  
```

```

===== CHANNEL f1 =====
NUC1      19F
P1        15.00 usec
PL1       3.21 dB
SFO1      376.4682462 MHz
  
```

```

===== CHANNEL f2 =====
CPDPRG2   waltz16
NUC2       1H
PCPD2     80.00 usec
PL2        0.00 dB
PL12      13.71 dB
PL12W     15.07131863 W
PL12W     0.64143294 W
SFO2      400.1316005 MHz
SI         65536
SF         376.4985566 MHz
WDW        EM
SSB         0
LB         0.30 Hz
GB         0
PC         1.00
  
```

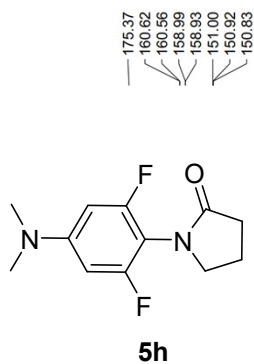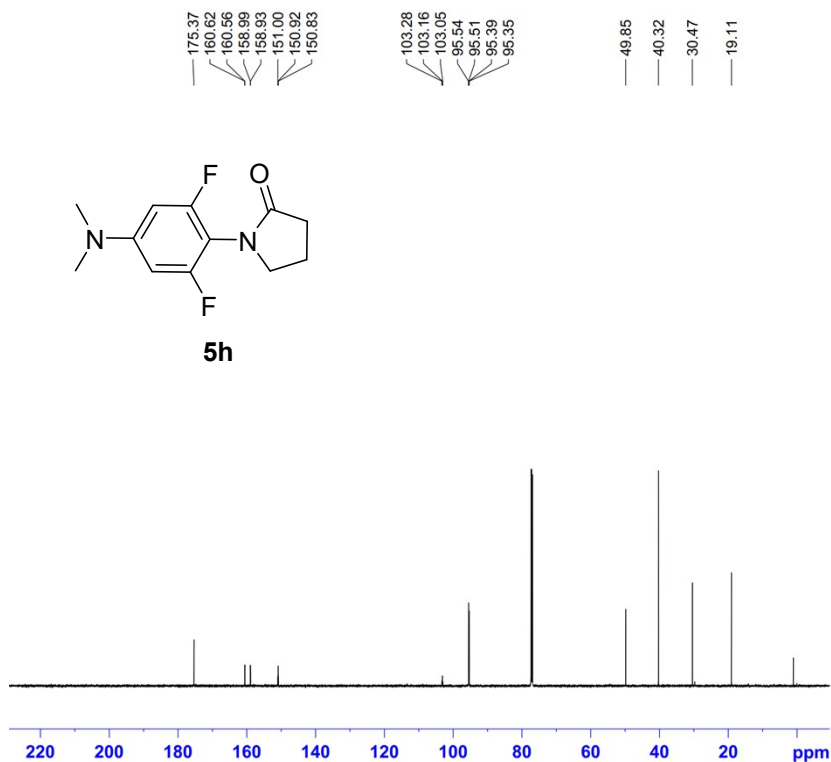

```

NAME      JOCamideine 5h
EXPNO     5
PROCNO    1
Date_     20190619
Time      9.41
INSTRUM   spect
PROBHD    5 mm PABBO BB-
PULPROG   zgpg30
TD         65536
SOLVENT   CDCl3
NS         287
DS         4
SWH        36057.691 Hz
FIDRES     0.550197 Hz
AQ         0.9088159 sec
RG         192.21
DW         13.867 usec
DE         6.50 usec
TE         299.5 K
D1         2.00000000 sec
D11        0.03000000 sec
TD0        1
  
```

```

===== CHANNEL f1 =====
SFO1      150.8062408 MHz
NUC1      13C
P1        11.00 usec
SI        32768
SF        150.7896414 MHz
WDW        EM
SSB         0
LB         1.00 Hz
GB         0
PC         1.40
  
```

6.807  
6.788  
6.773  
6.752  
6.728

3.760  
3.742  
3.725

2.600  
2.580  
2.559  
2.302  
2.283  
2.265

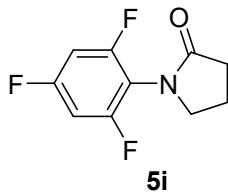

General  
DATE = 2018/10/10  
TIME = 10:43  
INSTRUM = spect  
PULPROG = zg30  
FI (1H)  
SI = 32768  
SF = 400.13  
SW\_p = 8278.146

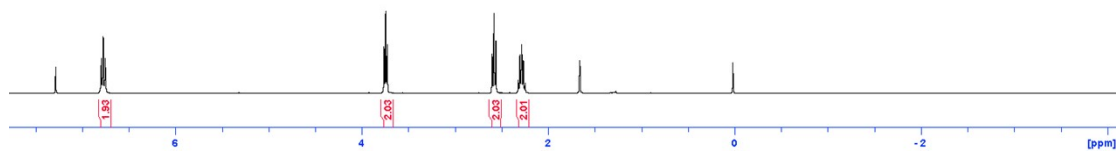

General  
DATE = 2018/10/11  
TIME = 10:05  
INSTRUM = spect  
PULPROG = zgfgcgm  
FI (13P)  
SI = 65536  
SF = 376.499  
SW\_p = 75187.97

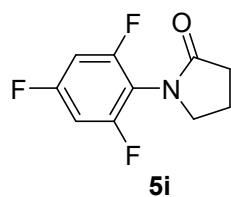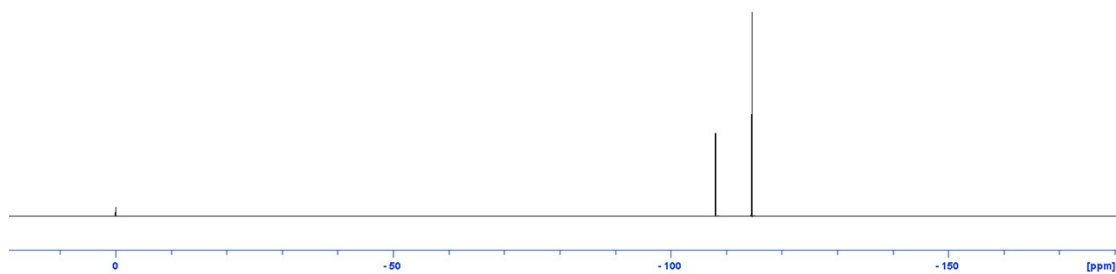

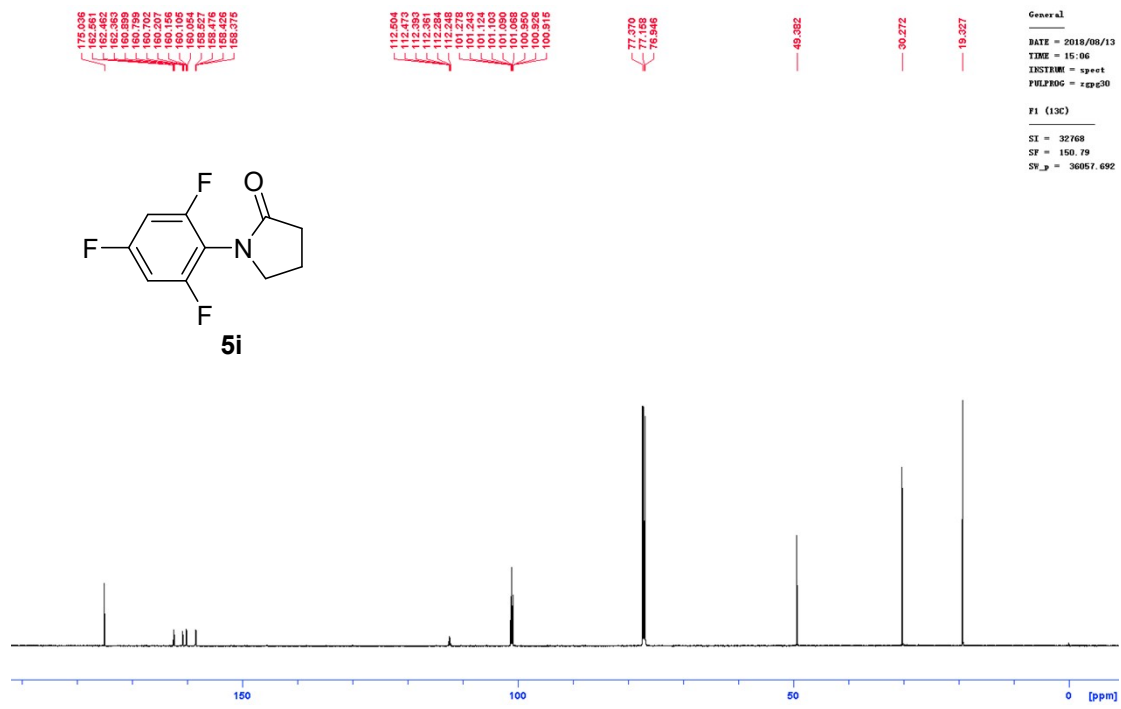

General  
 DATE = 2018/08/13  
 TIME = 15:06  
 INSTRUM = spect  
 PULPROG = zgpg30  
 F1 (13C)  
 SI = 32768  
 SF = 150.79  
 SW\_p = 36057.692

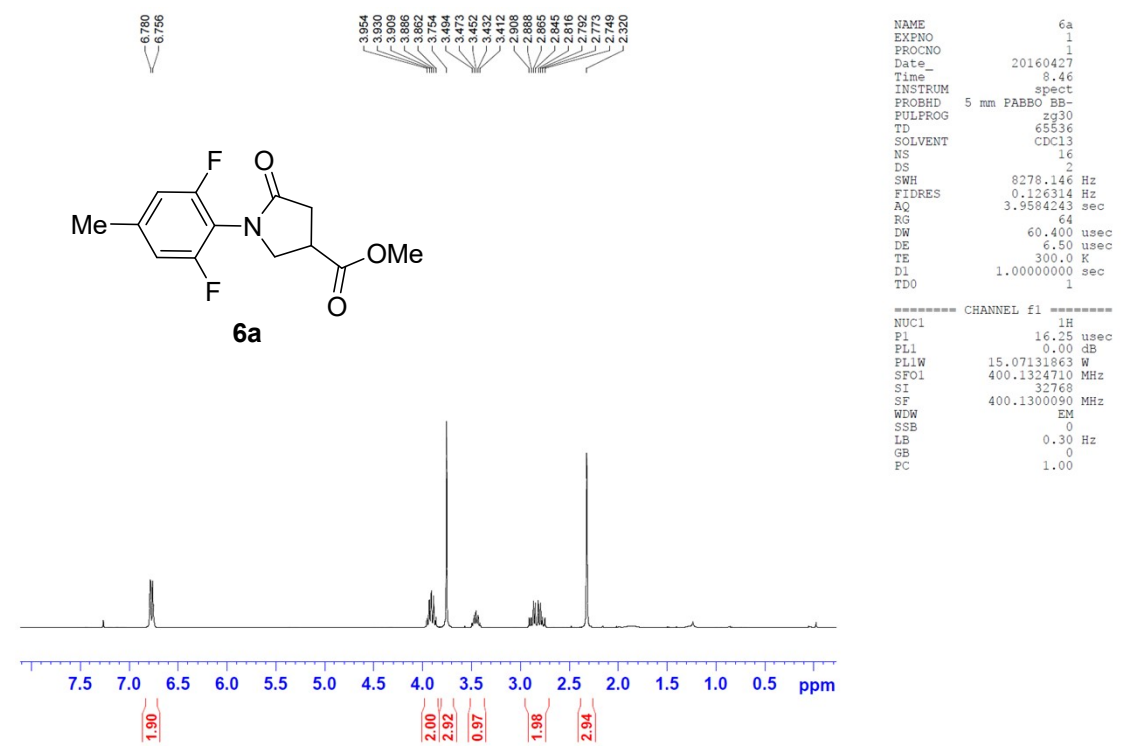

NAME 6a  
 EXPNO 1  
 PROCNO 1  
 Date\_ 20160427  
 Time 8.46  
 INSTRUM spect  
 PROBHD 5 mm PABBO BB-  
 PULPROG zg30  
 TD 65536  
 SOLVENT CDCl3  
 NS 16  
 DS 2  
 SWH 8278.146 Hz  
 FIDRES 0.126314 Hz  
 AQ 3.9584243 sec  
 RG 64  
 DW 60.400 usec  
 DE 6.50 usec  
 TE 300.0 K  
 D1 1.00000000 sec  
 TD0 1

----- CHANNEL f1 -----  
 NUC1 1H  
 P1 16.25 usec  
 PL1 0.00 dB  
 PL1W 15.07131863 W  
 SF01 400.1324710 MHz  
 SI 32768  
 SF 400.1300090 MHz  
 WDW EM  
 SSB 0  
 LB 0.30 Hz  
 GB 0  
 FC 1.00

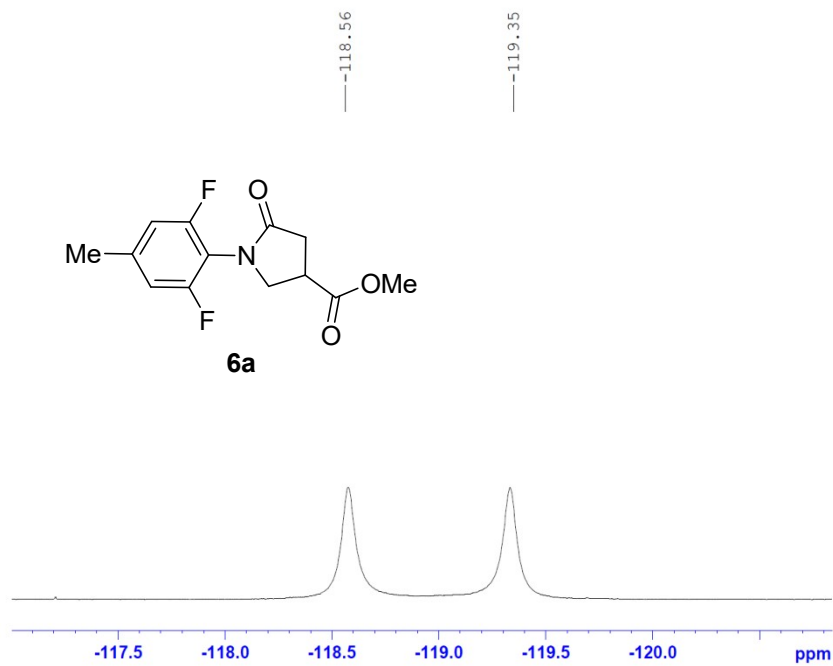

```

NAME          6a
EXPNO         7
PROCNO        1
Date_         20160428
Time          9.46
INSTRUM       spect
PROBHD        5 mm PABBO BB-
PULPROG       zgfhlgpn
TD            131072
SOLVENT       CDCl3
NS            32
DS            4
SWH           75187.969 Hz
FIDRES        0.573639 Hz
AQ            0.8716788 sec
RG            1290.2
DW            6.650 usec
DE            6.50 usec
TE            300.0 K
D1            1.00000000 sec
D11           0.03000000 sec
D12           0.00002000 sec
TD0           1
  
```

```

===== CHANNEL f1 =====
NUC1          19F
P1            15.00 usec
PL1           3.21 dB
SF01          376.4682462 MHz
  
```

```

===== CHANNEL f2 =====
CPDPRG2       waltz16
NUC2          1H
PCPD2         80.00 usec
PL2           0.00 dB
PL12          13.84 dB
PL2W          15.07131863 W
PL12W         0.62261705 W
SF02          400.1316005 MHz
SI            65536
SF            376.4985406 MHz
WDW           EM
SSB           0
LB            0.30 Hz
GB            0
PC            1.00
  
```

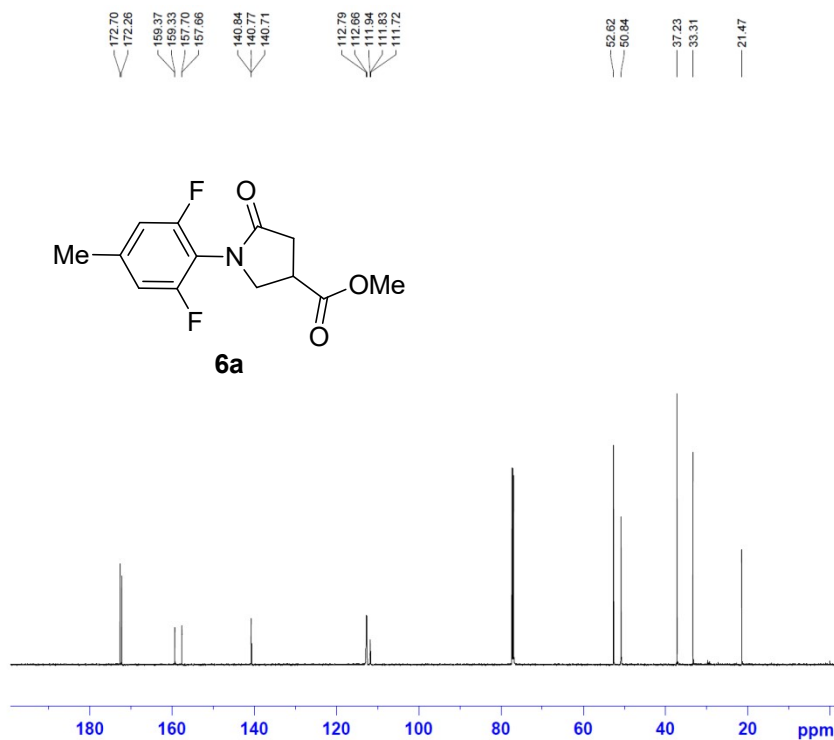

```

NAME          6a
EXPNO         5
PROCNO        1
Date_         20160427
Time          10.37
INSTRUM       spect
PROBHD        5 mm CPTCI 1H-
PULPROG       zgpg30
TD            65536
SOLVENT       CDCl3
NS            157
DS            4
SWH           36057.691 Hz
FIDRES        0.550197 Hz
AQ            0.9088159 sec
RG            107.97
LW           13.867 usec
DE            18.00 usec
TE            298.2 K
D1            2.00000000 sec
D11           0.03000000 sec
TD0           1
  
```

```

===== CHANNEL f1 =====
SF01          150.9068340 MHz
NUC1          13C
P1            12.00 usec
SI            32768
SF            150.8902269 MHz
WDW           EM
SSB           0
LB            1.00 Hz
GB            0
PC            1.40
  
```

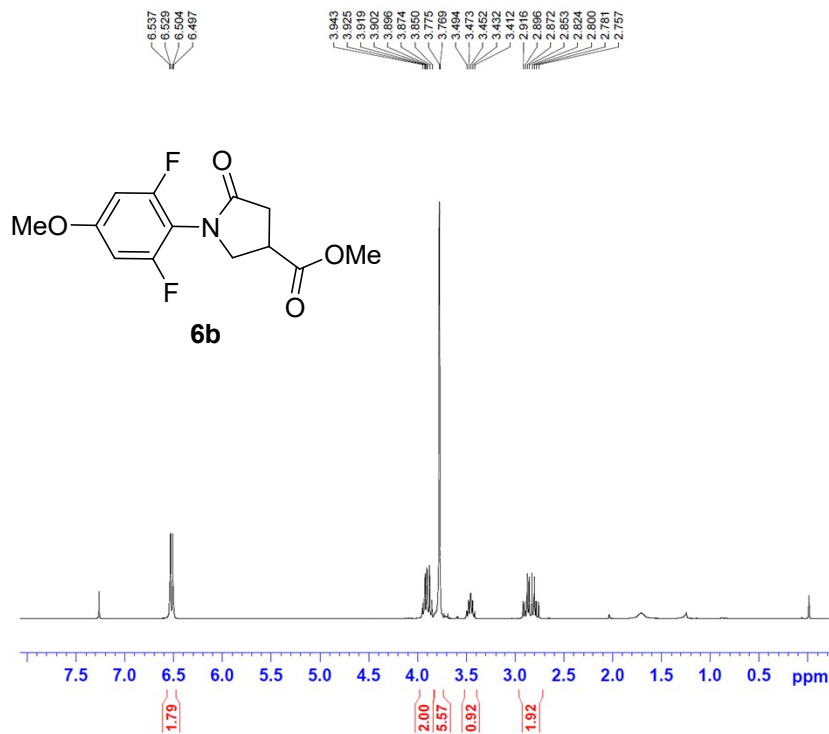

```

NAME          6b
EXPNO         1
PROCNO        1
Date_         20160304
Time          18.18
INSTRUM       spect
PROBHD        5 mm PABBO BB-
PULPROG       zg30
TD            65536
SOLVENT       CDCl3
NS            16
DS            2
SWH           8278.146 Hz
FIDRES        0.126314 Hz
AQ            3.9584243 sec
RG            128
DW            60.400 usec
DE            6.50 usec
TE            300.0 K
D1            1.00000000 sec
TD0           1

===== CHANNEL f1 =====
NUC1          1H
P1            16.25 usec
PL1           0.00 dB
PL1W          15.07131863 W
SF01          400.1324710 MHz
SI            32768
SF            400.1300095 MHz
WDW           EM
SSB           0
LB            0.30 Hz
GB            0
PC            1.00

```

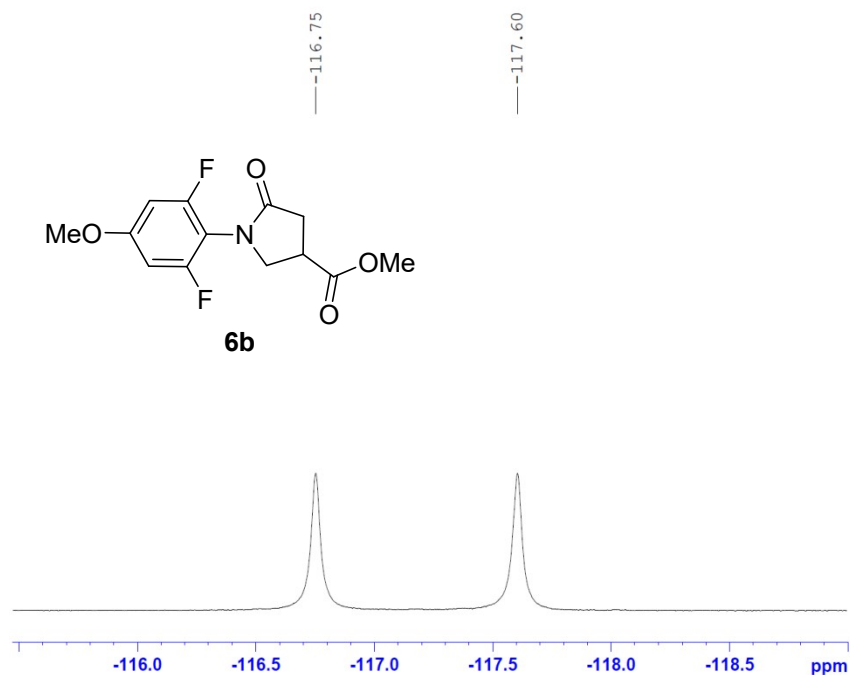

```

NAME          6b
EXPNO         7
PROCNO        1
Date_         20160304
Time          18.15
INSTRUM       spect
PROBHD        5 mm PABBO BB-
PULPROG       zgfhggn
TD            131072
SOLVENT       CDCl3
NS            32
DS            4
SWH           75187.969 Hz
FIDRES        0.573639 Hz
AQ            0.8716788 sec
RG            2896.3
DW            6.650 usec
DE            6.50 usec
TE            300.0 K
D1            1.00000000 sec
D11           0.03000000 sec
D12           0.00002000 sec
TD0           1

===== CHANNEL f1 =====
NUC1          19F
P1            15.00 usec
PL1           3.21 dB
SF01          376.4682462 MHz

===== CHANNEL f2 =====
CPDPRG2      waltz16
NUC2          1H
PCPD2        80.00 usec
PL2           0.00 dB
PL12          13.84 dB
PL2W          15.07131863 W
PL12W         0.62251705 W
SF02          400.1316005 MHz
SI            65536
SF            376.4985509 MHz
WDW           EM
SSB           0
LB            0.30 Hz
GB            0
PC            1.00

```



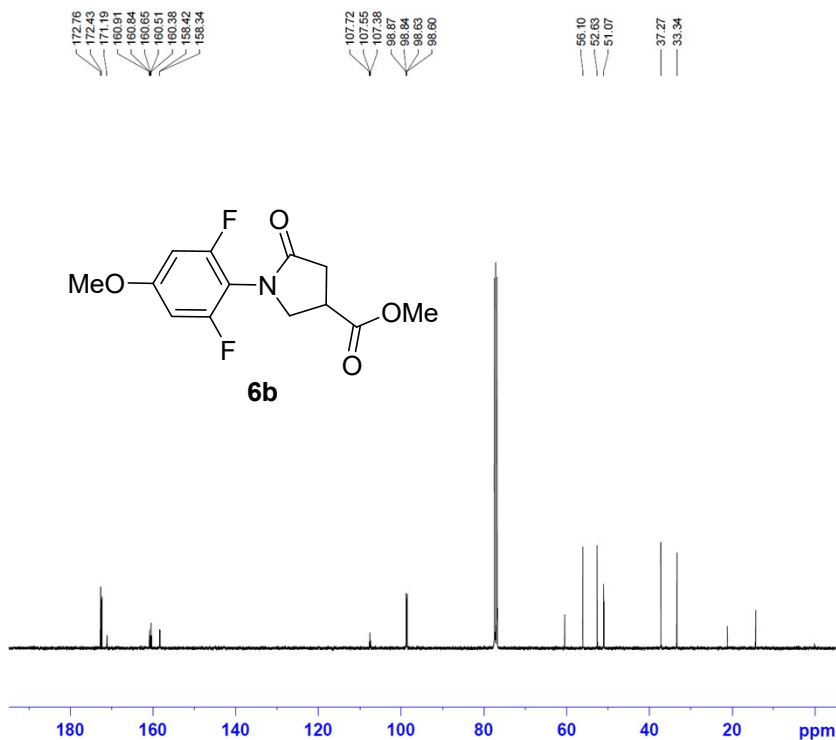

```

NAME          6b
EXPNO         5
PROCNO        1
Date_         20151222
Time_         7.19
INSTRUM       spect
PROBHD        5 mm PABBO BB-
PULPROG       zgpg30
TD            65536
SOLVENT       CDC13
NS            1536
DS            4
SWH           23980.814 Hz
FIDRES        0.365918 Hz
AQ            1.3664756 sec
RG            20642.5
DW            20.850 usec
DE            6.50 usec
TE            300.0 K
D1            2.00000000 sec
D11           0.03000000 sec
TD0           1
  
```

```

===== CHANNEL f1 =====
NUC1          13C
P1            15.50 usec
PL1           -1.23 dB
PL1W          50.01396179 W
SFO1          100.6238364 MHz
  
```

```

===== CHANNEL f2 =====
CPDPRG2      waltz16
NUC2          1H
PCPD2        80.00 usec
PL2           0.00 dB
PL12         13.84 dB
PL13         18.00 dB
PL2W         15.07131863 W
PL12W        0.62251705 W
PL13W        0.23886430 W
SFO2         400.1316005 MHz
SI           32768
SF           100.6127546 MHz
WDW           EM
SSB           0
LB            1.00 Hz
GB            0
PC            1.40
  
```

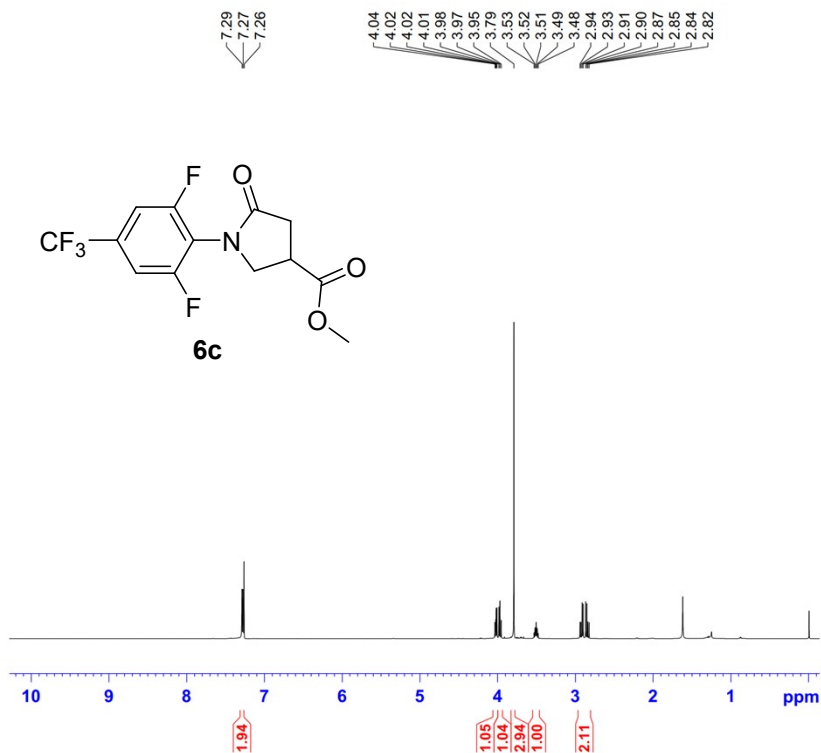

```

NAME          JOCamide 6c
EXPNO         1
PROCNO        1
Date_         20190617
Time_         13.08
INSTRUM       spect
PROBHD        5 mm PABBO BB/
PULPROG       zg30
TD            65536
SOLVENT       CDC13
NS            8
DS            2
SWH           12019.230 Hz
FIDRES        0.183399 Hz
AQ            2.7263477 sec
RG            85.63
DW            41.600 usec
DE            6.50 usec
TE            298.3 K
D1            1.00000000 sec
TD0           1
  
```

```

===== CHANNEL f1 =====
SFO1          599.6837033 MHz
NUC1          1H
P1            10.00 usec
SI           65536
SF           599.6800151 MHz
WDW           EM
SSB           0
LB            0.30 Hz
GB            0
PC            1.00
  
```

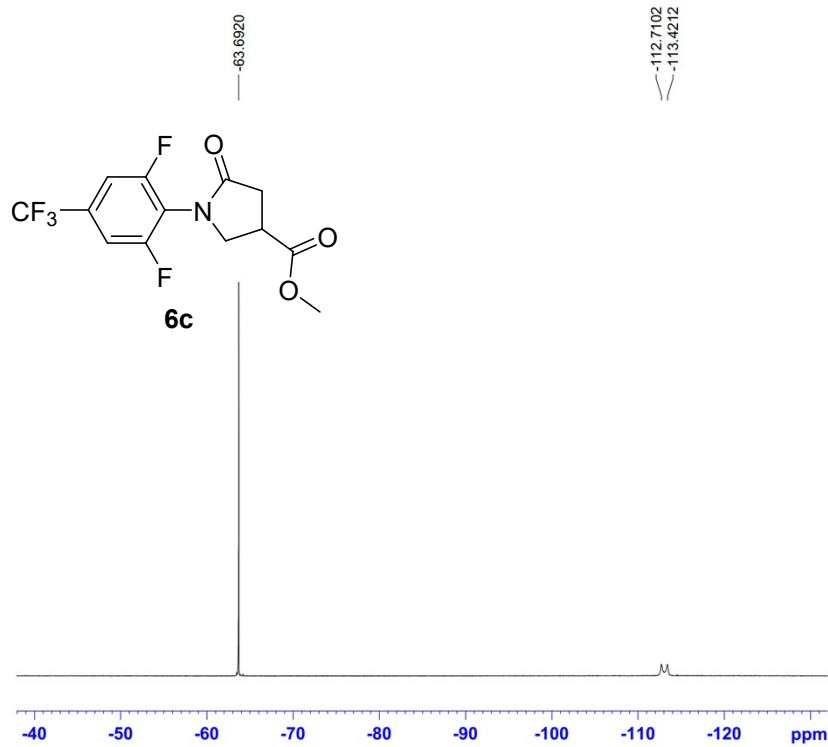

```

NAME      JOCamideine 6c
EXPNO    7
PROCNO   1
Date_    20190621
Time     11.37
INSTRUM  spect
PROBHD   5 mm PABBO BB-
PULPROG  zgfhigpn
TD       131072
SOLVENT  CDCl3
NS       32
DS       4
SWH      75187.969 Hz
FIDRES   0.573639 Hz
AQ       0.8716788 sec
RG       2580.3
DW       6.650 usec
DE       6.50 usec
TE       300.0 K
D1       1.00000000 sec
D11      0.03000000 sec
D12      0.00002000 sec
TD0      1

===== CHANNEL f1 =====
NUC1     19F
P1       15.00 usec
PL1      3.21 dB
SFO1     376.4682461 MHz

===== CHANNEL f2 =====
CPDPRG2  waltz16
NUC2     1H
PCPD2    80.00 usec
PL2      0.00 dB
PL12     13.71 dB
PL2W     15.07131863 W
PL12W    0.64143294 W
SFO2     400.1316005 MHz
SI       65536
SF       376.4993666 MHz
WDW      EM
SSB      0
LB       0.30 Hz
GB       0
PC       1.00

```

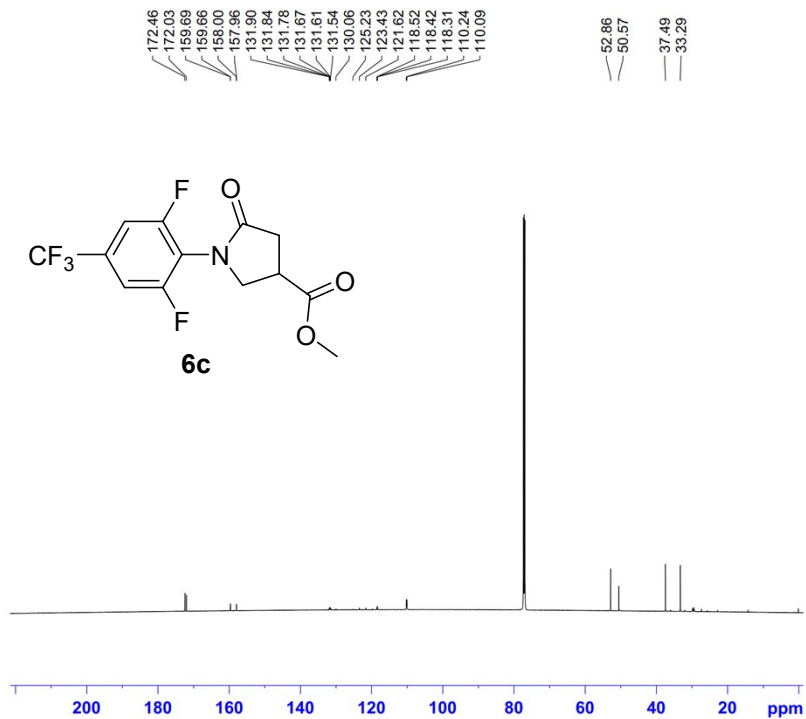

```

NAME      JOCamideine 6c
EXPNO    5
PROCNO   1
Date_    20160311
Time     9.18
INSTRUM  spect
PROBHD   5 mm CPTCI 1H-
PULPROG  zgpg30
TD       65536
SOLVENT  CDCl3
NS       2541
DS       4
SWH      36057.691 Hz
FIDRES   0.550197 Hz
AQ       0.9088159 sec
RG       107.97
DW       13.867 usec
DE       18.00 usec
TE       298.2 K
D1       2.00000000 sec
D11      0.03000000 sec
TD0      1

===== CHANNEL f1 =====
SFO1     150.9068340 MHz
NUC1     13C
P1       12.00 usec
SI       32768
SF       150.8902159 MHz
WDW      EM
SSB      0
LB       1.00 Hz
GB       0
PC       1.40

```

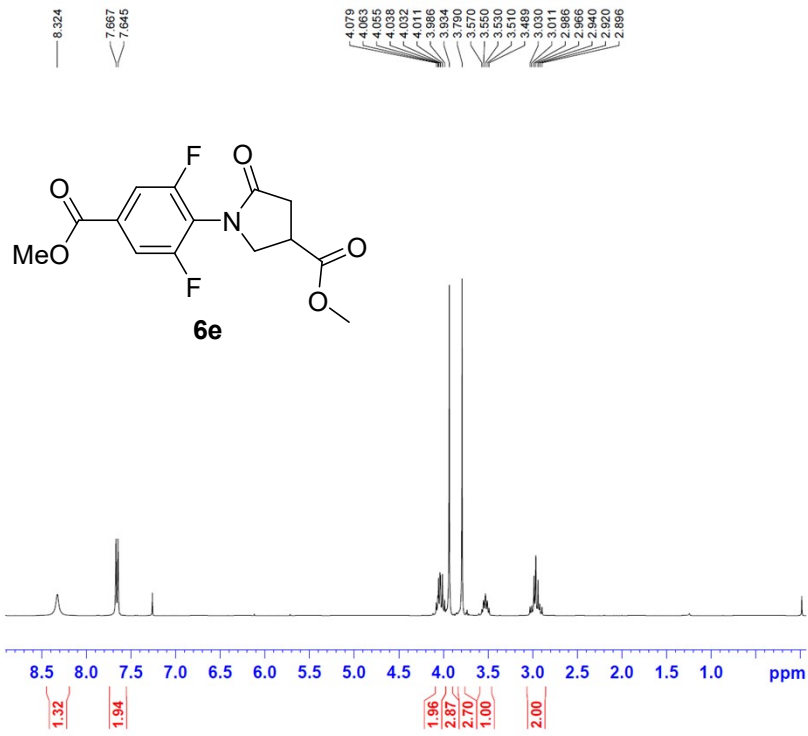

```

NAME          6c
EXPNO         1
PROCNO        1
Date_         20160113
Time          8.39
INSTRUM       spect
PROBHD        5 mm PABBO BB-
PULPROG       zg30
TD            65536
SOLVENT       CDCl3
NS            16
DS            2
SWH           8278.146 Hz
FIDRES        0.126314 Hz
AQ            3.9584243 sec
RG            14
DW            60.400 usec
DE            6.50 usec
TE            300.0 K
D1            1.00000000 sec
D11           1
D12           1
D13           1
D14           1
D15           1
D16           1
D17           1
D18           1
D19           1
D20           1
===== CHANNEL f1 =====
NUC1          1H
P1            16.25 usec
PL1           0.00 dB
PL1W          15.07131863 W
SFO1          400.1324710 MHz
SI            32768
SF            400.1300093 MHz
WDW           EM
SSB           0
LB            0.30 Hz
GB            0
PC            1.00
  
```

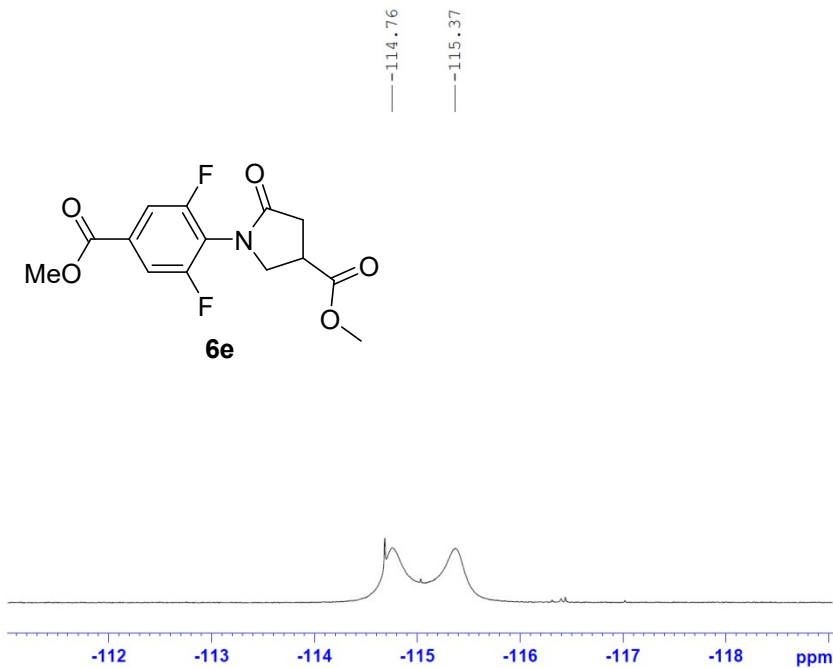

```

NAME          6c
EXPNO         7
PROCNO        1
Date_         20160406
Time          17.22
INSTRUM       spect
PROBHD        5 mm PABBO BB-
PULPROG       zgpg30
TD            131072
SOLVENT       CDCl3
NS            32
DS            4
SWH           75187.969 Hz
FIDRES        0.573639 Hz
AQ            0.8716788 sec
RG            1625.5
DW            6.650 usec
DE            6.50 usec
TE            300.0 K
D1            1.00000000 sec
D11           0.03000000 sec
D12           0.00002000 sec
D13           1
D14           1
D15           1
D16           1
D17           1
D18           1
D19           1
D20           1
===== CHANNEL f1 =====
NUC1          13C
P1            19F
PL1           15.00 usec
PL1W          3.21 dB
SFO1          376.4602462 MHz
===== CHANNEL f2 =====
CPDPRG2       waltz16
NUC2          1H
FCPD2         80.00 usec
PL2           0.00 dB
PL12          13.84 dB
PL2W          15.07131863 W
PL12W         0.62251705 W
SFO2          400.1316005 MHz
SI            65536
SF            376.4985406 MHz
WDW           EM
SSB           0
LB            0.30 Hz
GB            0
PC            1.00
  
```

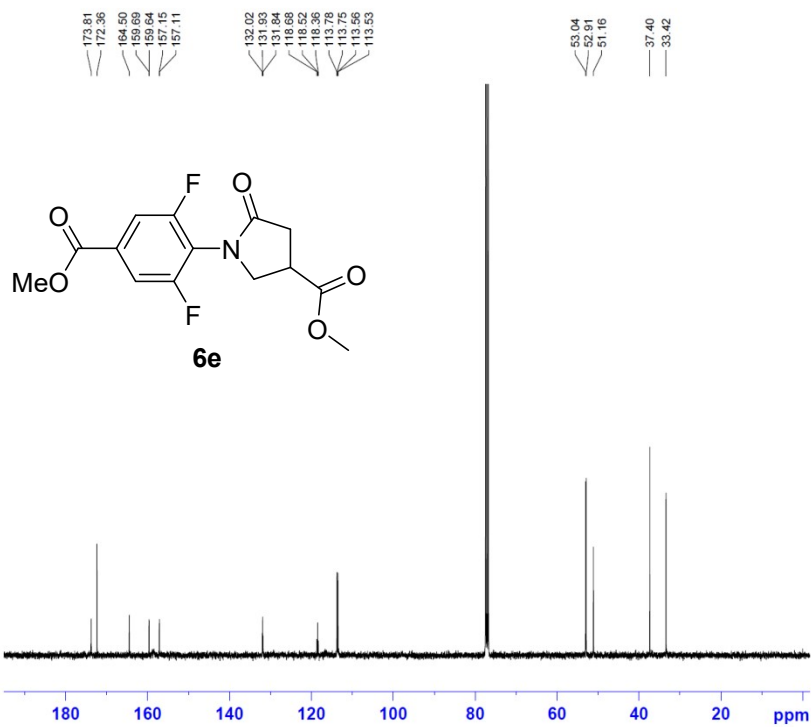

```

NAME          6c
EXPNO         5
PROCNO        1
Date_         20160113
Time_         15.23
INSTRUM       spect
PROBHD        5 mm PABBO BB-
PULPROG       zgpg30
TD            65536
SOLVENT       CDCl3
NS            711
DS            4
SWH           23980.814 Hz
FIDRES        0.365918 Hz
AQ            1.3664756 sec
RG            14596.5
FW           20.950 usec
DE            6.50 usec
TE            300.0 K
D1            2.00000000 sec
DL1           0.03000000 sec
TDO           1
  
```

```

===== CHANNEL f1 =====
NUC1          13C
P1            15.50 usec
PL1           -1.23 dB
PL1W          50.01396179 W
SF01          100.6238364 MHz

===== CHANNEL f2 =====
CPDPRG2      waltz16
NUC2          1H
PCPD2        80.00 usec
PL2           0.00 dB
PL12         13.84 dB
PL13         18.00 dB
PL2W         15.07131863 W
PL12W        0.62251705 W
PL13W        0.23886430 W
SFO2         400.1316005 MHz
SI           32768
SF           100.6127539 MHz
WDW          EM
SSB          0
LB           1.00 Hz
GB           0
PC           1.40
  
```

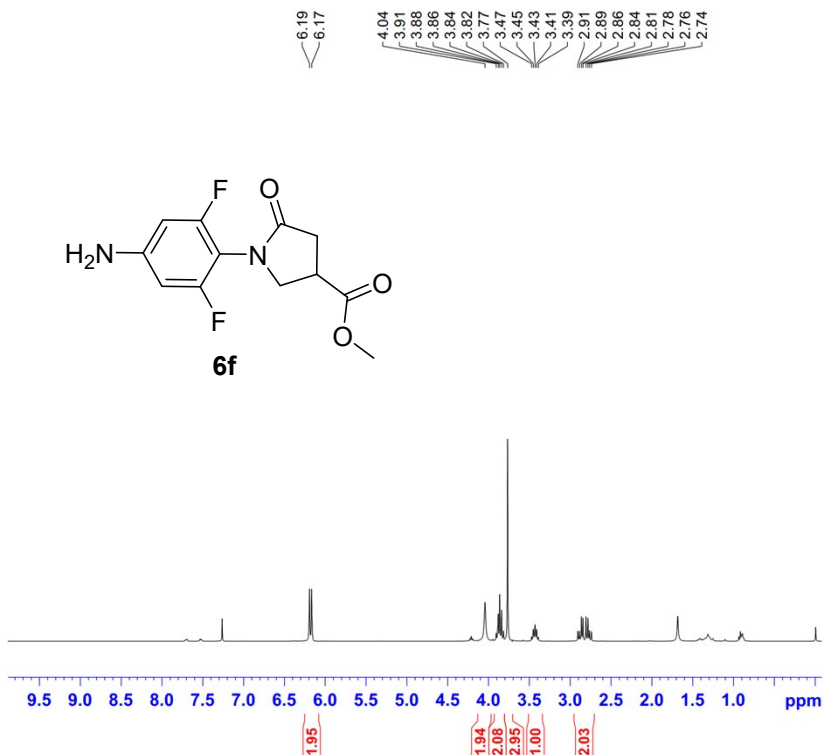

```

NAME          JOCamide 6f
EXPNO         1
PROCNO        1
Date_         20160411
Time_         15.47
INSTRUM       spect
PROBHD        5 mm PABBO BB-
PULPROG       zg30
TD            65536
SOLVENT       CDCl3
NS            16
DS            2
SWH           8278.146 Hz
FIDRES        0.126314 Hz
AQ            3.9584243 sec
RG            128
DW            60.400 usec
DE            6.50 usec
TE            300.0 K
D1            1.00000000 sec
TDO           1
  
```

```

===== CHANNEL f1 =====
NUC1          1H
P1            16.25 usec
PL1           0.00 dB
PL1W          15.07131863 W
SF01          400.1324710 MHz
SI           32768
SF           400.1300088 MHz
WDW          EM
SSB          0
LB           0.30 Hz
GB           0
PC           1.00
  
```

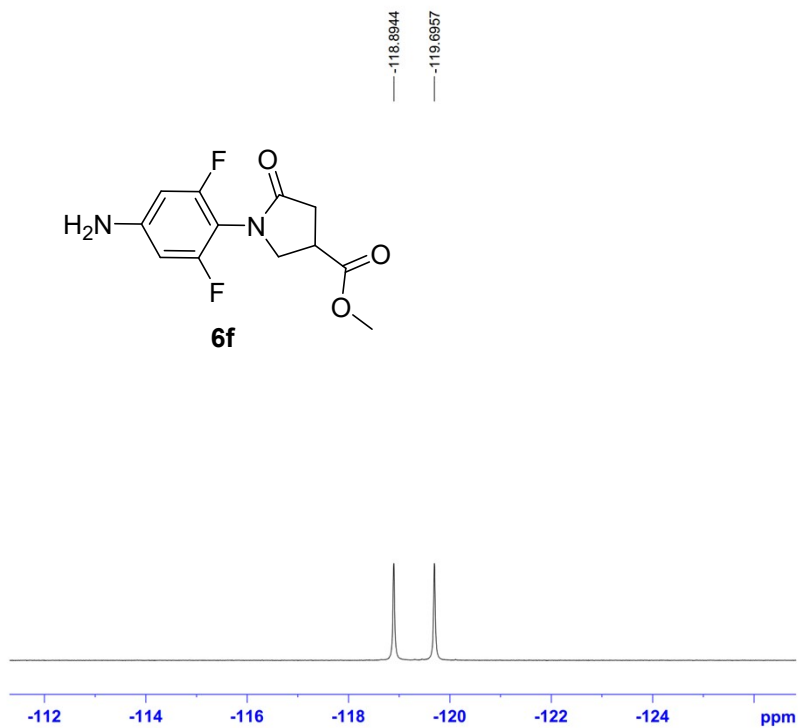

```

NAME      JOCamideine 6f
EXPNO     7
PROCNO    1
Date_     20160411
Time      15.51
INSTRUM   spect
PROBHD    5 mm PABBO BB-
PULPROG   zgfhigpn
TD        131072
SOLVENT   CDCl3
NS        32
DS        4
SWH       75187.969 Hz
FIDRES    0.573639 Hz
AQ        0.8716788 sec
RG        2298.8
DW        6.650 usec
DE        6.50 usec
TE        300.0 K
D1        1.00000000 sec
D11       0.03000000 sec
D12       0.00002000 sec
TDO       1
  
```

```

===== CHANNEL f1 =====
NUC1      19F
P1        15.00 usec
PL1       3.21 dB
SFO1     376.4682462 MHz
  
```

```

===== CHANNEL f2 =====
CPDPRG2   waltz16
NUC2      1H
PCPD2     80.00 usec
PL2       0.00 dB
PL12     13.84 dB
PL2W     15.07131863 W
PL12W    0.62251705 W
SFO2     400.1316005 MHz
SI        65536
SF        376.4985509 MHz
WDW       EM
SSB       0
LB        0.30 Hz
GB        0
PC        1.00
  
```

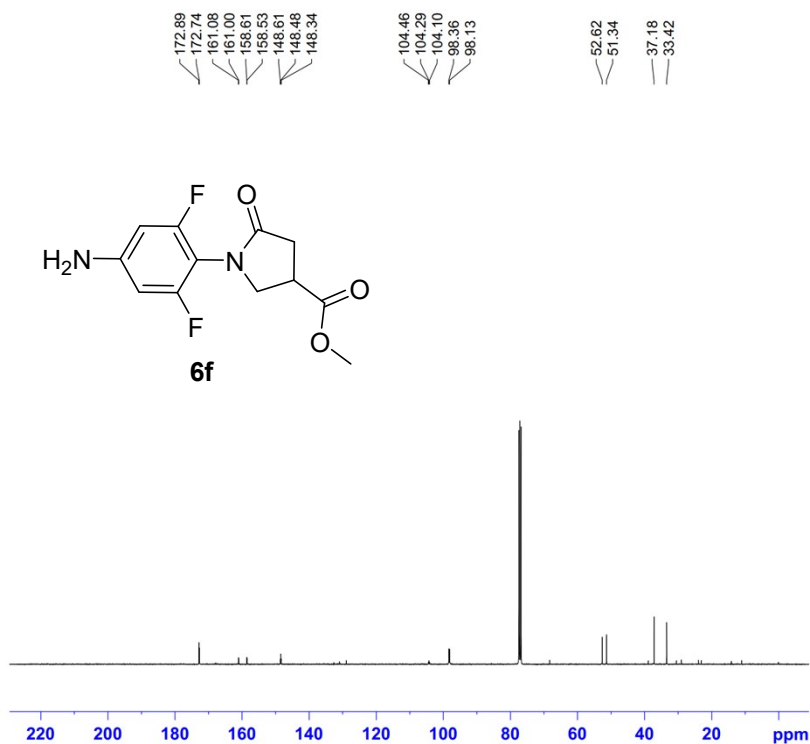

```

NAME      JOCamideine 6f
EXPNO     5
PROCNO    1
Date_     20160410
Time      23.01
INSTRUM   spect
PROBHD    5 mm PABBO BB-
PULPROG   zgpg30
TD        65536
SOLVENT   CDCl3
NS        6144
DS        4
SWH       23980.814 Hz
FIDRES    0.365918 Hz
AQ        1.3664756 sec
RG        13004
DW        20.850 usec
DE        6.50 usec
TE        300.0 K
D1        2.00000000 sec
D11       0.03000000 sec
TDO       1
  
```

```

===== CHANNEL f1 =====
NUC1      13C
P1        15.50 usec
PL1       -1.23 dB
PL1W     50.01396179 W
SFO1     100.6238364 MHz
  
```

```

===== CHANNEL f2 =====
CPDPRG2   waltz16
NUC2      1H
PCPD2     80.00 usec
PL2       0.00 dB
PL12     13.84 dB
PL13     18.00 dB
PL2W     15.07131863 W
PL12W    0.62251705 W
PL13W    0.23886430 W
SFO2     400.1316005 MHz
SI        32768
SF        100.6127539 MHz
WDW       EM
SSB       0
LB        1.00 Hz
GB        0
PC        1.40
  
```

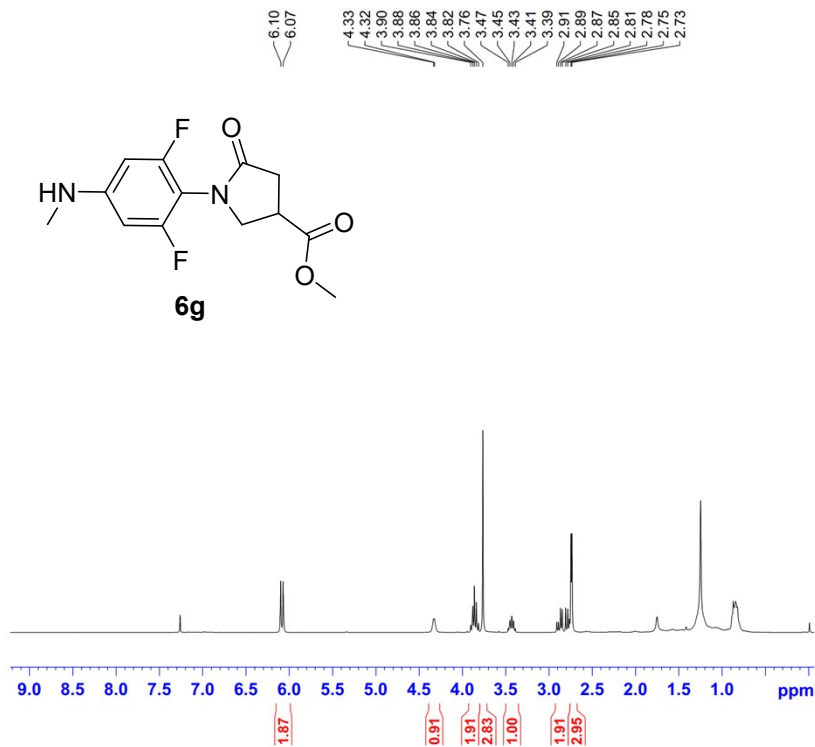

```

NAME      JOCamideine 6g
EXPNO    1
PROCNO   1
Date_    20160429
Time     9.46
INSTRUM  spect
PROBHD   5 mm PABBO BB-
PULPROG  zg30
TD       65536
SOLVENT  CDCl3
NS       16
DS       2
SWH      8278.146 Hz
FIDRES   0.126314 Hz
AQ       3.9584243 sec
RG       71.8
DW       60.400 usec
DE       6.50 usec
TE       300.0 K
D1       1.00000000 sec
TD0      1
===== CHANNEL f1 =====
NUC1     1H
P1       16.25 usec
PL1      0.00 dB
PL1W     15.07131863 W
SFO1     400.1324710 MHz
SI       32768
SF       400.1300090 MHz
WDW      EM
SSB      0
LB       0.30 Hz
GB       0
PC       1.00

```

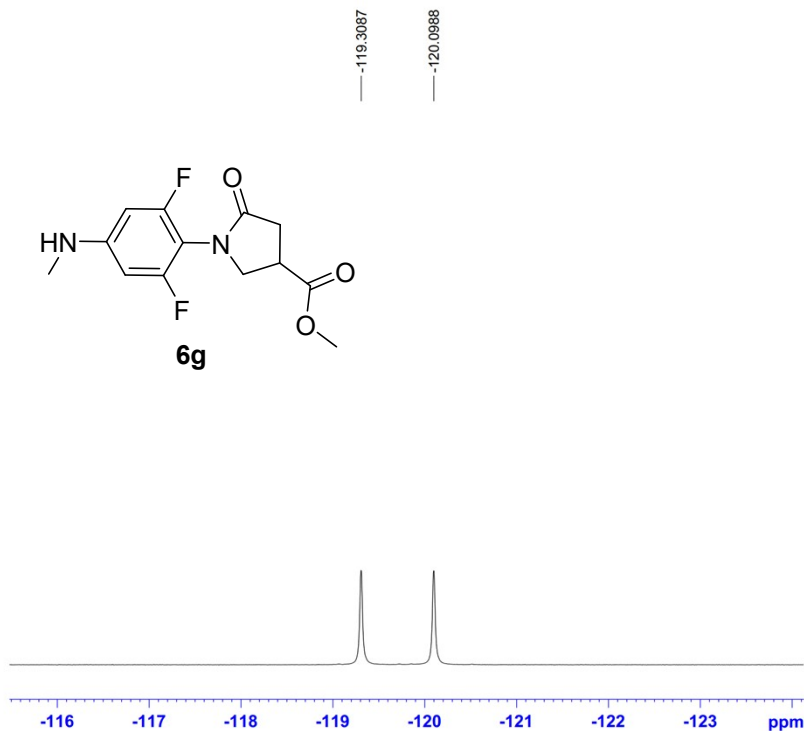

```

NAME      JOCamideine 6g
EXPNO    7
PROCNO   1
Date_    20160429
Time     9.50
INSTRUM  spect
PROBHD   5 mm PABBO BB-
PULPROG  zgfhlggn
TD       131072
SOLVENT  CDCl3
NS       32
DS       4
SWH      75187.969 Hz
FIDRES   0.573639 Hz
AQ       0.8716788 sec
RG       2580.3
DW       6.650 usec
DE       6.50 usec
TE       300.0 K
D1       1.00000000 sec
D11     0.03000000 sec
D12     0.00002000 sec
TD0      1
===== CHANNEL f1 =====
NUC1     19F
P1       15.00 usec
PL1      3.21 dB
SFO1     376.4682462 MHz
===== CHANNEL f2 =====
CFDPRG2  waltz16
NUC2     1H
PCPD2    80.00 usec
PL2      0.00 dB
PL12     13.84 dB
PL2W     15.07131863 W
PL12W    0.62251705 W
SFO2     400.1316005 MHz
SI       65536
SF       376.4985520 MHz
WDW      EM
SSB      0
LB       0.30 Hz
GB       0
PC       1.00

```

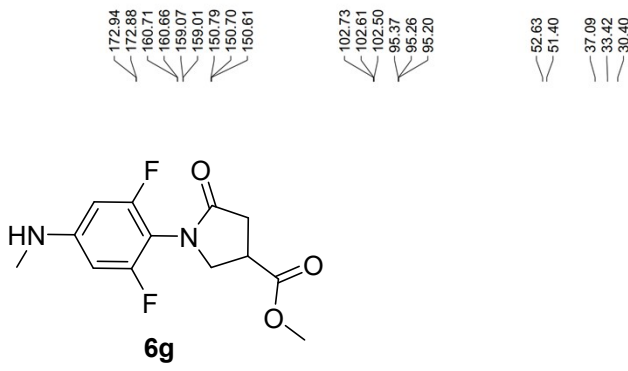

```

NAME          JOCamide 6g
EXPNO         5
PROCNO        1
Date_         20160428
Time          17.28
INSTRUM       spect
PROBHD        5 mm CPTCI 1H-
PULPROG       zgpg30
TD            65536
SOLVENT       CDCl3
NS            118
DS            4
SWH           36057.691 Hz
FIDRES        0.550197 Hz
AQ            0.9088159 sec
RG            85.63
DW            13.867 usec
DE            18.00 usec
TE            298.2 K
D1            2.0000000 sec
D11           0.0300000 sec
TDO           1

===== CHANNEL f1 =====
SF01          150.9068340 MHz
NUC1          13C
P1            12.00 usec
SI            32768
SF            150.8902203 MHz
WDW           EM
SSB           0
LB            1.00 Hz
GB            0
PC            1.40
  
```

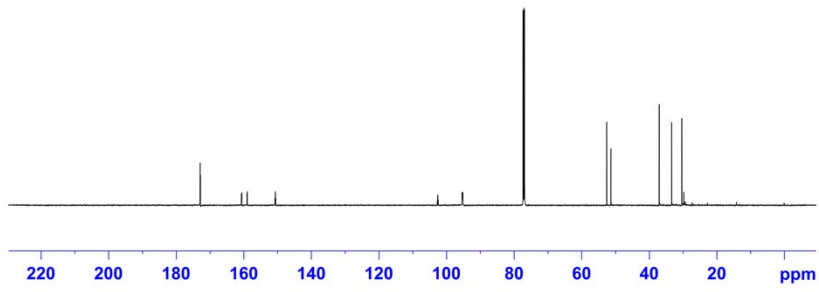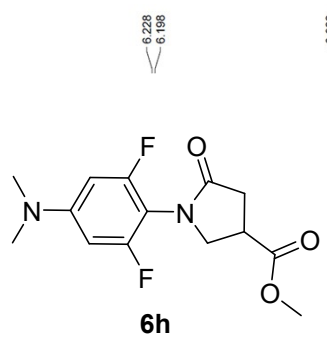

```

NAME          6e
EXPNO         1
PROCNO        1
Date_         20160428
Time          9.15
INSTRUM       spect
PROBHD        5 mm FABBO BB-
PULPROG       zg30
TD            65536
SOLVENT       CDCl3
NS            16
DS            2
SWH           8278.146 Hz
FIDRES        0.126314 Hz
AQ            3.9584243 sec
RG            128
DW            60.400 usec
DE            6.50 usec
TE            300.0 K
D1            1.0000000 sec
TDO           1

===== CHANNEL f1 =====
NUC1          1H
P1            16.25 usec
PL1          0.00 dB
PL1W         15.07131863 W
SF01          400.1324710 MHz
SI            32768
SF            400.1300090 MHz
WDW           EM
SSB           0
LB            0.30 Hz
GB            0
PC            1.00
  
```

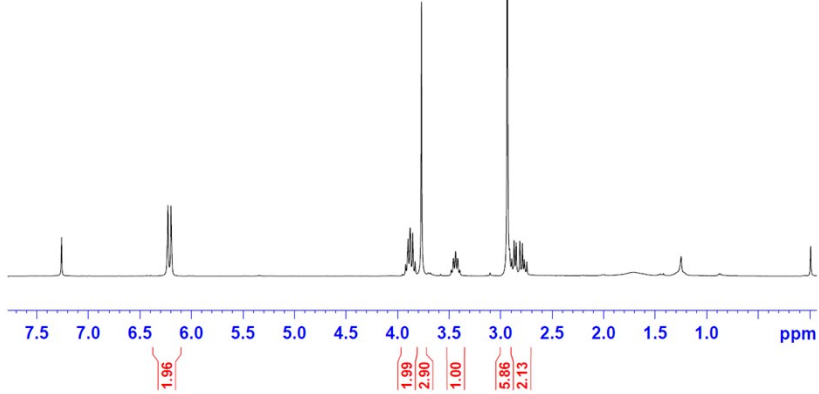

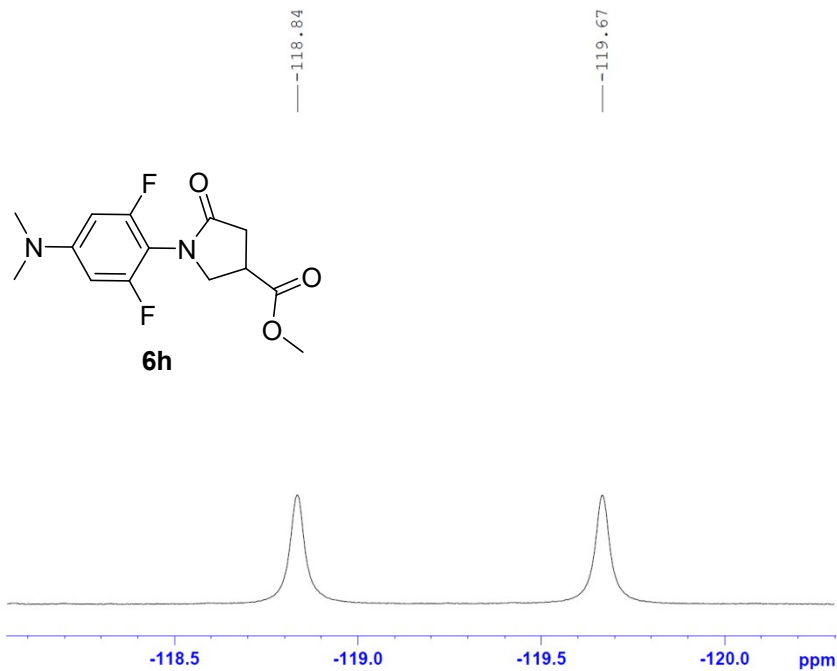

```

NAME          6e
EXPNO         7
PROCNO        1
Date_         20160503
Time          10.33
INSTRUM       spect
PROBHD        5 mm PABBO BB-
PULPROG       zgfhigpn
TD            131072
SOLVENT       CDCl3
NS            32
DS            4
SWH           75187.969 Hz
FIDRES        0.573639 Hz
AQ            0.8716788 sec
RG            4096
DW            6.650 usec
DE            6.50 usec
TE            300.0 K
D1            1.00000000 sec
D11           0.03000000 sec
D12           0.00002000 sec
TD0           1
  
```

```

===== CHANNEL f1 =====
NUC1          19F
P1            15.00 usec
PL1           3.21 dB
SFO1         376.4682462 MHz
  
```

```

===== CHANNEL f2 =====
CPDPRG2       waltz16
NUC2          1H
PCPD2         80.00 usec
PL2           0.00 dB
PL12          13.84 dB
PL2W          15.07131863 W
PL12W         0.62251705 W
SFO2         400.1316005 MHz
SI            65536
SF            376.4985544 MHz
WDW           EM
SSB           0
LB            0.30 Hz
GB            0
PC            1.00
  
```

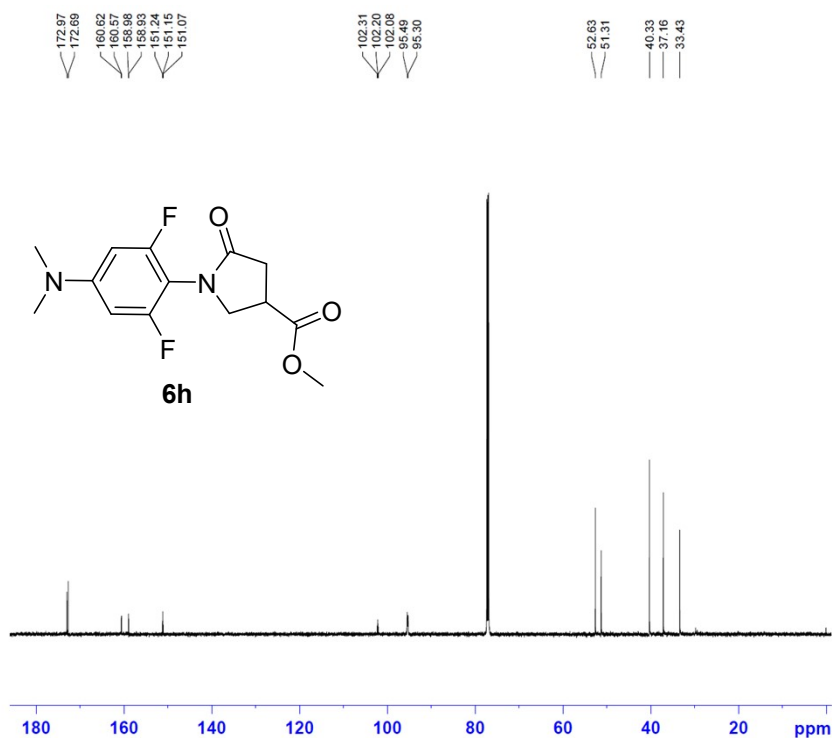

```

NAME          6e
EXPNO         5
PROCNO        1
Date_         20160429
Time          8.53
INSTRUM       spect
PROBHD        5 mm CPTCI 1H-
PULPROG       zgpg30
TD            65536
SOLVENT       CDCl3
NS            56
DS            4
SWH           36057.691 Hz
FIDRES        0.550197 Hz
AQ            0.9088159 sec
RG            107.97
DW            13.867 usec
DE            18.00 usec
TE            298.2 K
D1            2.00000000 sec
D11           0.03000000 sec
TD0           1
  
```

```

===== CHANNEL f1 =====
SFO1         150.9068340 MHz
NUC1         13C
P1            12.00 usec
SI            32768
SF            150.8902181 MHz
WDW           EM
SSB           0
LB            1.00 Hz
GB            0
PC            1.40
  
```



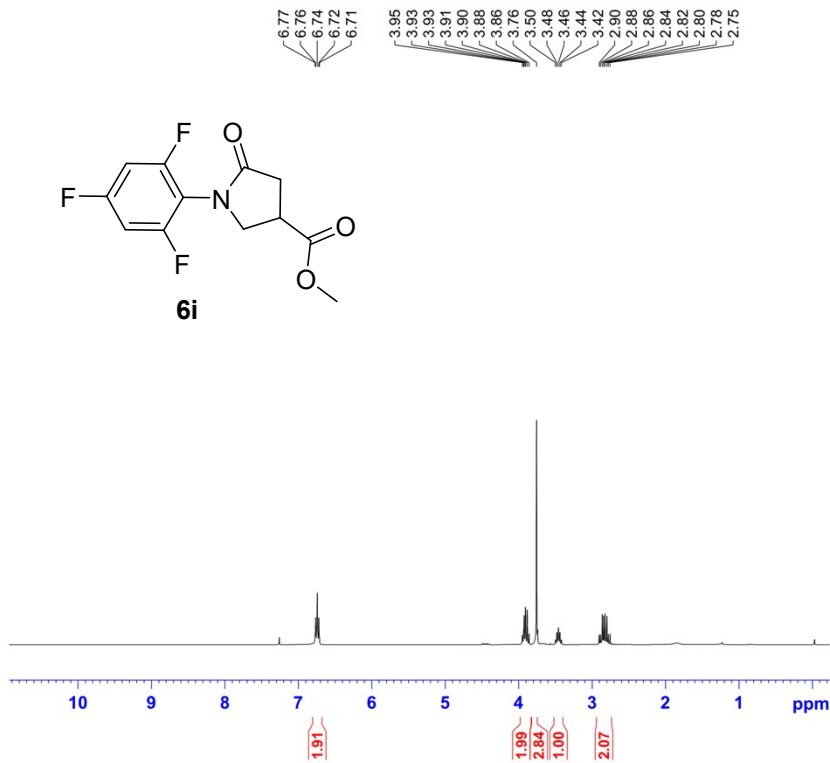

```

NAME      JOCamideine 6i
EXPNO    1
PROCNO   1
Date_    20160304
Time     17.34
INSTRUM  spect
PROBHD   5 mm PABBO BB-
PULPROG  zg30
TD       65536
SOLVENT  CDCl3
NS       16
DS       2
SWH      8278.146 Hz
FIDRES   0.126314 Hz
AQ       3.9584243 sec
RG       71.8
DW       60.400 usec
DE       6.50 usec
TE       300.0 K
D1       1.00000000 sec
TD0      1
  
```

```

===== CHANNEL f1 =====
NUC1     1H
P1       16.25 usec
PL1      0.00 dB
PL1W     15.07131863 W
SFO1     400.1324710 MHz
SI       32768
SF       400.1300093 MHz
WDW      EM
SSB      0
LB       0.30 Hz
GB       0
PC       1.00
  
```

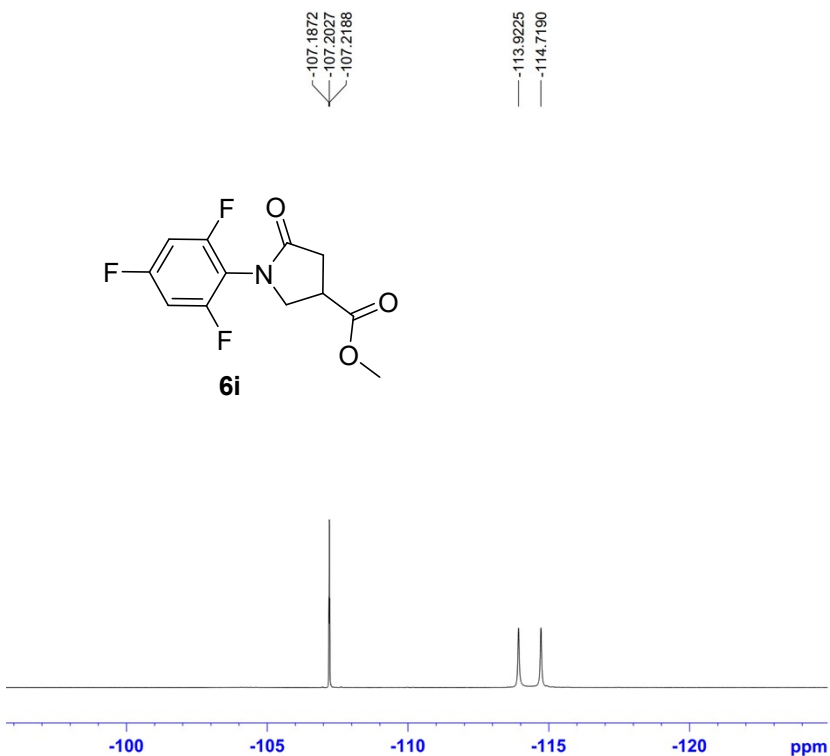

```

NAME      JOCamideine 6i
EXPNO    7
PROCNO   1
Date_    20160304
Time     17.38
INSTRUM  spect
PROBHD   5 mm PABBO BB-
PULPROG  zgfhiggn
TD       131072
SOLVENT  CDCl3
NS       32
DS       4
SWH      75187.969 Hz
FIDRES   0.573639 Hz
AQ       0.8716788 sec
RG       1024
DW       6.650 usec
DE       6.50 usec
TE       300.0 K
D1       1.00000000 sec
D11      0.03000000 sec
D12      0.00002000 sec
TD0      1
  
```

```

===== CHANNEL f1 =====
NUC1     19F
P1       15.00 usec
PL1      3.21 dB
SFO1     376.4682462 MHz

===== CHANNEL f2 =====
CPDPRG2  waltz16
NUC2     1H
PCPD2    80.00 usec
PL2      0.00 dB
PL12     13.84 dB
PL2W     15.07131863 W
PL12W    0.62251705 W
SFO2     400.1316005 MHz
SI       65536
SF       376.4985337 MHz
WDW      EM
SSB      0
LB       0.30 Hz
GB       0
PC       1.00
  
```

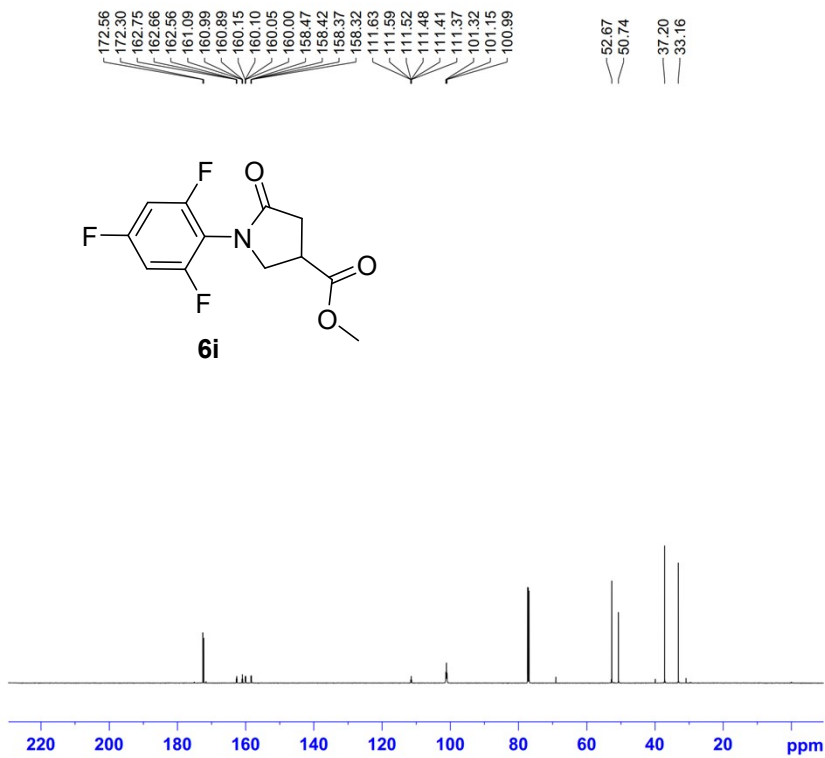

```

NAME      JOCamidine 6i
EXPNO    5
PROCNO   1
Date_    20151224
Time     9.42
INSTRUM  spect
PROBHD   5 mm CPTCI 1H-
PULPROG  zgpg30
TD       65536
SOLVENT  CDCl3
NS       141
DS       4
SWH      36057.691 Hz
FIDRES   0.550197 Hz
AQ       0.9088159 sec
RG       107.97
DW       13.867 usec
DE       18.00 usec
TE       298.0 K
D1       2.0000000 sec
D11      0.0300000 sec
TDO     1

```

----- CHANNEL f1 -----

```

SF01     150.9068340 MHz
NUC1     13C
P1       12.00 usec
SI       32768
SF       150.8902269 MHz
WDW      EM
SSB      0
LB       1.00 Hz
GB       0
PC       1.40

```

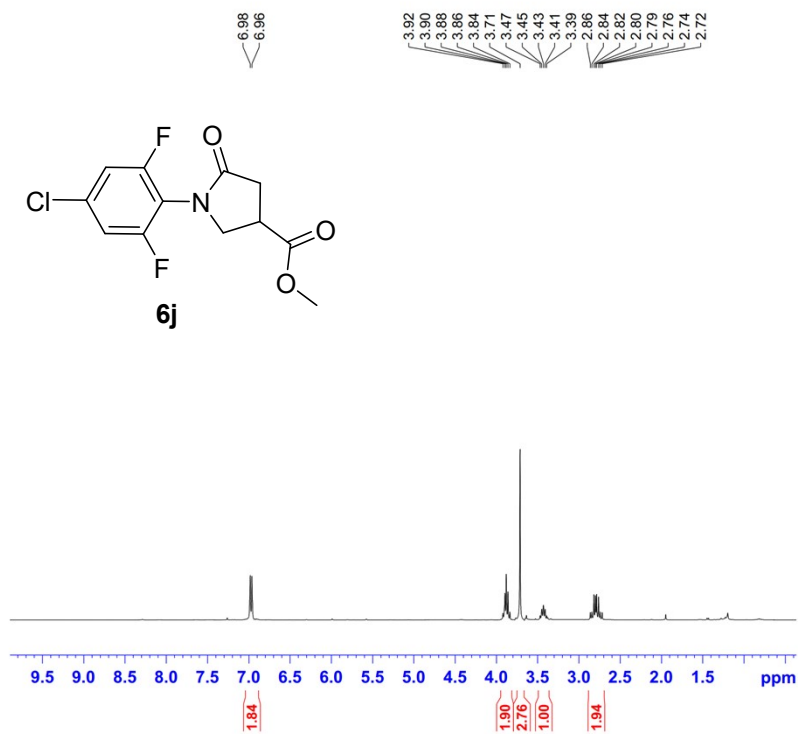

```

NAME      JOCamidine 6j
EXPNO    1
PROCNO   1
Date_    20160406
Time     14.41
INSTRUM  spect
PROBHD   5 mm PABBO BB-
PULPROG  zg30
TD       65536
SOLVENT  CDCl3
NS       16
DS       2
SWH      8278.146 Hz
FIDRES   0.126314 Hz
AQ       3.9584243 sec
RG       35.9
DW       60.400 usec
DE       6.50 usec
TE       300.0 K
D1       1.0000000 sec
TDO     1

```

----- CHANNEL f1 -----

```

NUC1     1H
P1       16.25 usec
PL1     0.00 dB
PL1W    15.07131863 W
SF01    400.1324710 MHz
SI       32768
SF       400.1300087 MHz
WDW      EM
SSB      0
LB       0.30 Hz
GB       0
PC       1.00

```

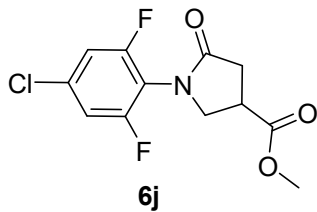

Chemical shift values for the 13C NMR spectrum:  
 -114.9021  
 -115.5801

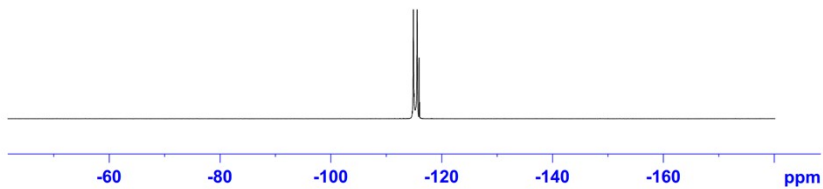

```

NAME      JOCamide 6j
EXPNO    7
PROCNO   1
Date_    20160406
Time     14.44
INSTRUM  spect
PROBHD   5 mm FAPBO BB-
PULPROG  zgfhigqn
TD       131072
SOLVENT  CDCl3
NS       32
DS       4
SWH      75187.969 Hz
FIDRES   0.573639 Hz
AQ       0.8716788 sec
RG       645.1
DW       6.650 usec
DE       6.50 usec
TE       300.0 K
D1       1.00000000 sec
D11      0.03000000 sec
D12      0.00002000 sec
TD0      1
  
```

```

===== CHANNEL f1 =====
NUC1     19F
P1       15.00 usec
PL1      3.21 dB
SFO1     376.4682462 MHz
  
```

```

===== CHANNEL f2 =====
CPDPRG2  waltz16
NUC2     1H
PCPD2    80.00 usec
PL2      0.00 dB
PL12     13.84 dB
PL2W     15.07131863 W
PL12W    0.62251705 W
SFO2     400.1316005 MHz
SI       65536
SF       376.4985072 MHz
WDW      EM
SSB      0
LB       0.30 Hz
GB       0
PC       1.00
  
```

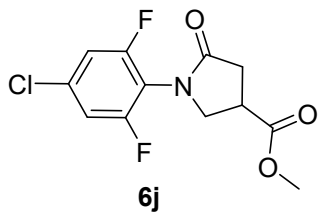

Chemical shift values for the 13C NMR spectrum:  
 172.42, 172.13, 169.45, 159.41, 157.75, 157.71, 134.52, 134.44, 134.36, 113.88, 113.77, 113.66, 113.38, 113.23, 113.22, 52.45, 50.63, 37.10, 35.04

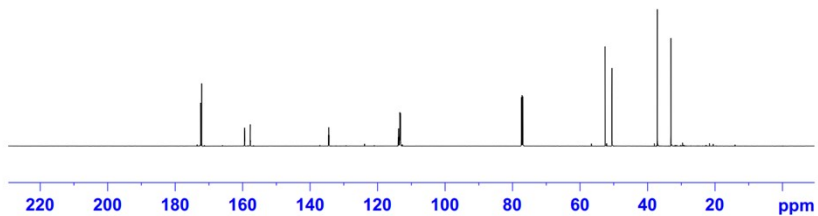

```

NAME      JOCamide 6j
EXPNO    5
PROCNO   1
Date_    20160105
Time     10.32
INSTRUM  spect
PROBHD   5 mm CPTCI 1H-
PULPROG  zgpg30
TD       65536
SOLVENT  CDCl3
NS       590
DS       4
SWH      36057.691 Hz
FIDRES   0.550197 Hz
AQ       0.9088159 sec
RG       76.16
DW       13.867 usec
DE       18.00 usec
TE       298.0 K
D1       2.00000000 sec
D11      0.03000000 sec
TD0      1
  
```

```

===== CHANNEL f1 =====
SFO1     150.9068340 MHz
NUC1     13C
P1       12.00 usec
SI       32768
SF       150.8902412 MHz
WDW      EM
SSB      0
LB       1.00 Hz
GB       0
PC       1.40
  
```

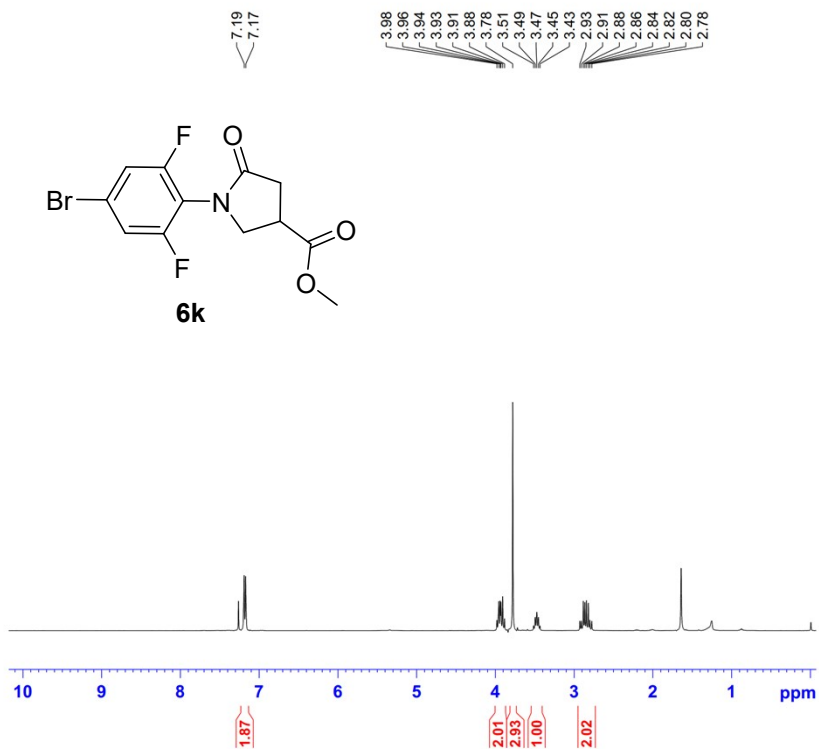

```

NAME      JOCamideine 6k
EXPNO    1
PROCNO   1
Date_    20160421
Time     10.24
INSTRUM  spect
PROBHD   5 mm PABBO BB-
PULPROG  zg30
TD        65536
SOLVENT  CDCl3
NS        16
DS        2
SWH       8278.146 Hz
FIDRES    0.126314 Hz
AQ         3.9584243 sec
RG         181
DM         60.400 usec
DE         6.50 usec
TE         300.0 K
D1         1.0000000 sec
D10       1
  
```

```

===== CHANNEL f1 =====
NUC1      1H
P1        16.25 usec
PL1       0.00 dB
PL1W      15.07131863 W
SFO1      400.1324710 MHz
SI         32768
SF         400.1300090 MHz
WDW       EM
SSB       0
LB        0.30 Hz
GB         0
PC         1.00
  
```

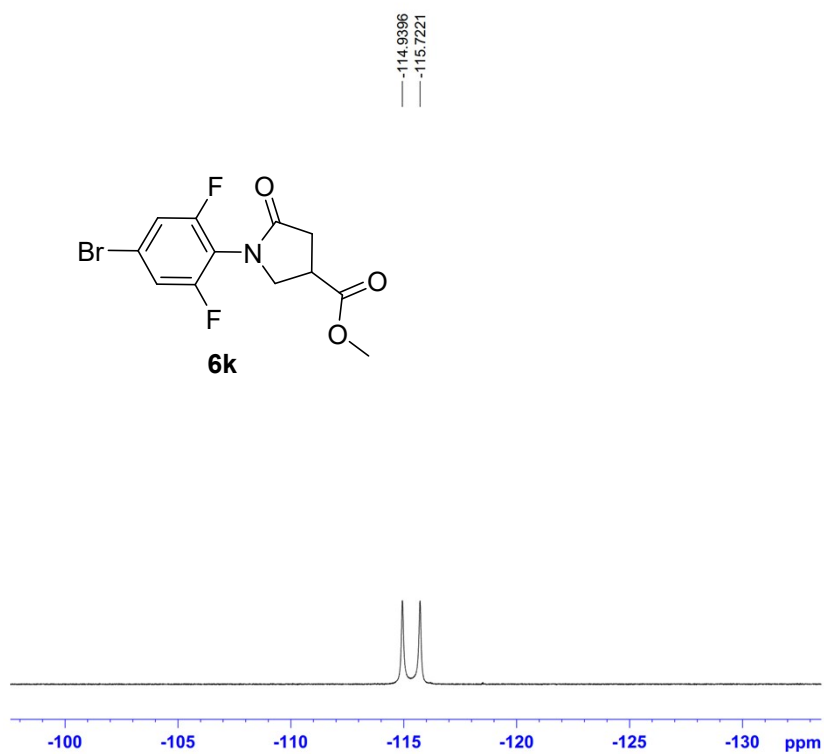

```

NAME      JOCamideine 6k
EXPNO    7
PROCNO   1
Date_    20170109
Time     8.03
INSTRUM  spect
PROBHD   5 mm PABBO BB-
PULPROG  zgfhigqn
TD        131072
SOLVENT  CDCl3
NS        32
DS        4
SWH       75187.969 Hz
FIDRES    0.573639 Hz
AQ         0.8716788 sec
RG         3251
DM         6.650 usec
DE         6.50 usec
TE         300.0 K
D1         1.0000000 sec
D11        0.0300000 sec
D12        0.0000200 sec
D10       1
  
```

```

===== CHANNEL f1 =====
NUC1      13C
P1        15.00 usec
PL1       3.21 dB
SFO1      376.4682462 MHz
  
```

```

===== CHANNEL f2 =====
CPDPRG2  waltz16
NUC2      1H
PCPD2    80.00 usec
PL2       0.00 dB
PL12     13.84 dB
PL2W      15.07131863 W
PL12W     0.62251705 W
SFO2      400.1316005 MHz
SI         65536
SF         376.4985555 MHz
WDW       EM
SSB       0
LB        0.30 Hz
GB         0
PC         1.00
  
```

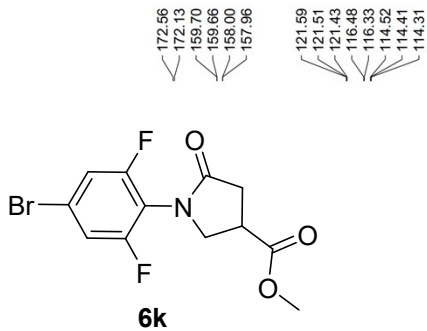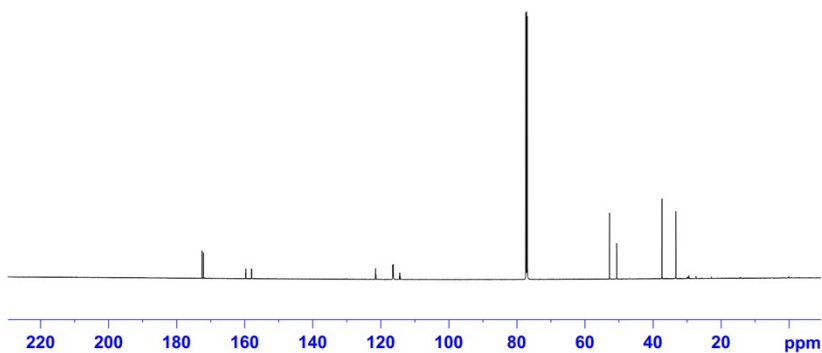

```

NAME      JOCamideine 6k
EXPNO    5
PROCNO    1
Date_     20160421
Time      15.37
INSTRUM   spect
PROBHD    5 mm CPTCI 1H-
PULPROG   zgpg30
TD         65536
SOLVENT   CDC13
NS         667
DS         4
SWH        36057.691 Hz
FIDRES     0.550197 Hz
AQ         0.9088159 sec
RG         107.97
DW         13.867 usec
DE         18.00 usec
TE         298.2 K
D1         2.0000000 sec
D11        0.0300000 sec
TD0        1
  
```

```

===== CHANNEL f1 =====
SF01     150.9068340 MHz
NUC1      13C
P1        12.00 usec
SI        32768
SF        150.8902181 MHz
WDW        EM
SSB        0
LB         1.00 Hz
GB         0
PC         1.40
  
```

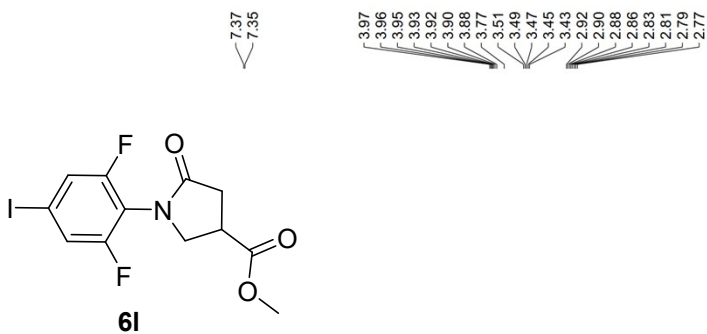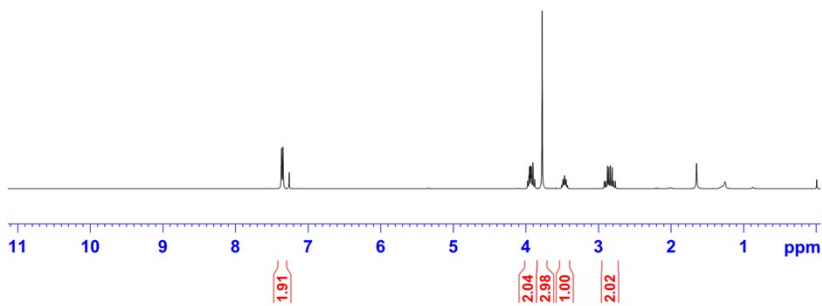

```

NAME      JOCamideine 6l
EXPNO    1
PROCNO    1
Date_     20160401
Time      8.25
INSTRUM   spect
PROBHD    5 mm PABBO BB-
PULPROG   zg30
TD         65536
SOLVENT   CDC13
NS         16
DS         2
SWH        8278.146 Hz
FIDRES     0.126314 Hz
AQ         3.9584243 sec
RG         161.3
DW         60.400 usec
DE         6.50 usec
TE         300.0 K
D1         1.0000000 sec
TD0        1
  
```

```

===== CHANNEL f1 =====
NUC1      1H
P1        16.25 usec
PL1       0.00 dB
PL1W      15.07131863 W
SF01     400.1324710 MHz
SI        32768
SF        400.1300092 MHz
WDW        EM
SSB        0
LB         0.30 Hz
GB         0
PC         1.00
  
```

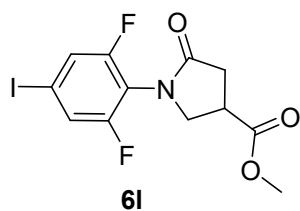

115.4417  
116.2034

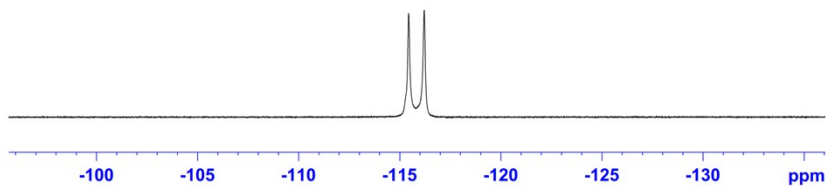

```

NAME      JOCamide 61
EXPNO     7
PROCNO    1
Date_     20170109
Time      9.23
INSTRUM   spect
PROBHD    5 mm PABBO BB-
PULPROG   zgfhigqn
TD         131072
SOLVENT   CDCl3
NS         32
DS         4
SWH        75187.969 Hz
FIDRES     0.573639 Hz
AQ         0.8715788 sec
RG         2580.3
DW         6.650 usec
DE         6.50 usec
TE         300.0 K
D1         1.00000000 sec
D11        0.03000000 sec
D12        0.00020000 sec
TD0        1
  
```

```

===== CHANNEL f1 =====
NUC1      19F
P1        15.00 usec
PL1       3.21 dB
SFO1      376.4682462 MHz
  
```

```

===== CHANNEL f2 =====
CPDPRG2   waltz16
NUC2       1H
PCPD2     80.00 usec
PL2        0.00 dB
PL12      13.84 dB
PL2W      15.07131863 W
PL12W     0.62251705 W
SFO2      400.1316005 MHz
SI         65536
SF         376.4985566 MHz
WDW        EM
SSB        0
LB         0.30 Hz
GB         0
PC         1.00
  
```

172.55  
172.07  
159.39  
159.35  
157.68  
157.64

122.20  
122.05  
115.27  
115.17  
115.06

91.07  
91.00  
90.94

52.77  
50.60  
37.36  
33.28

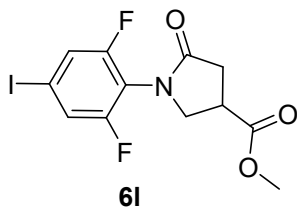

```

NAME      JOCamide 61
EXPNO     5
PROCNO    1
Date_     20160401
Time      14.57
INSTRUM   spect
PROBHD    5 mm CPTCI 1H-
PULPROG   zgpg30
TD         65536
SOLVENT   CDCl3
NS         602
DS         4
SWH        36057.691 Hz
FIDRES     0.550197 Hz
AQ         0.9088159 sec
RG         121.41
DW         13.867 usec
DE         18.00 usec
TE         298.2 K
D1         2.00000000 sec
D11        0.03000000 sec
TD0        1
  
```

```

===== CHANNEL f1 =====
SFO1      150.9068340 MHz
NUC1       13C
P1         12.00 usec
SI         32768
SF         150.8902197 MHz
WDW        EM
SSB        0
LB         1.00 Hz
GB         0
PC         1.40
  
```

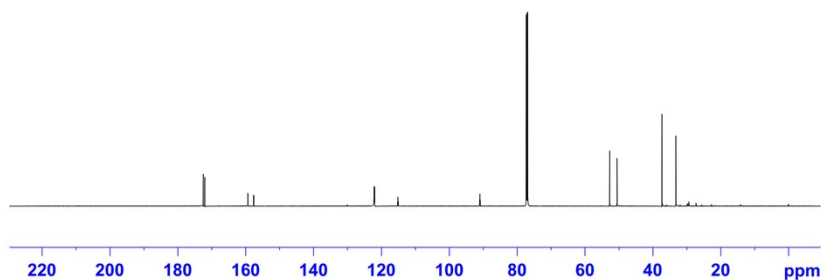

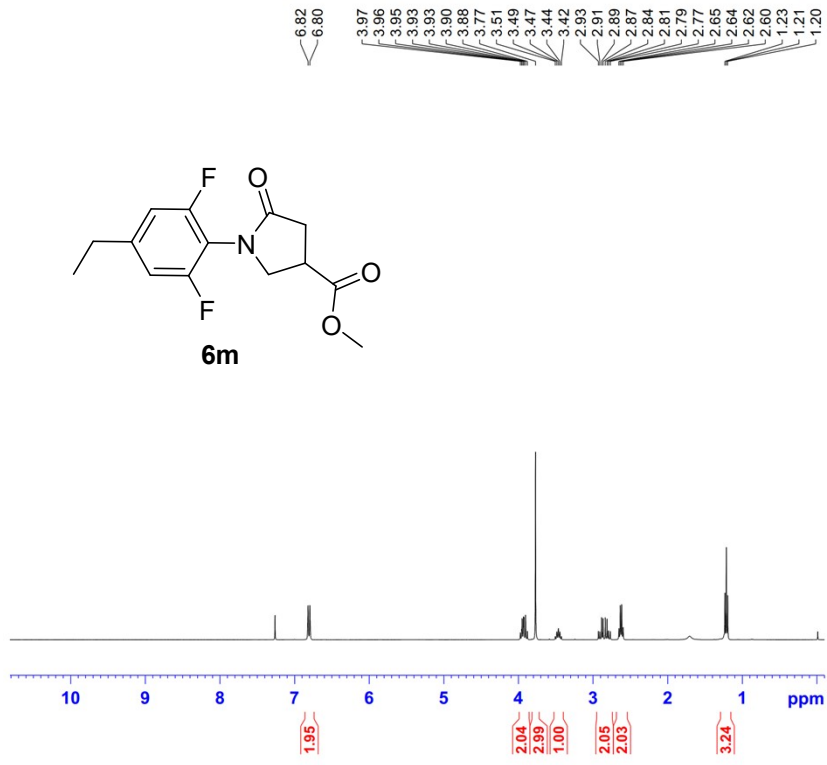

```

NAME      JOCamidine 6m
EXPNO    1
PROCNO    1
Date_     20190621
Time      17.31
INSTRUM   spect
PROBHD    5 mm PABBO BB-
PULPROG   zg30
TD         65536
SOLVENT   CDCl3
NS         16
DS         2
SWH        8278.146 Hz
FIDRES     0.126314 Hz
AQ         3.9584243 sec
RG         128
DW         60.400 usec
DE         6.50 usec
TE         300.0 K
D1         1.00000000 sec
TDO        1
===== CHANNEL f1 =====
NUC1      1H
P1        16.50 usec
PL1       0.00 dB
PL1W      15.07131863 W
SFO1      400.1324710 MHz
SI        32768
SF        400.1300093 MHz
WDW        EM
SSB        0
LB        0.30 Hz
GB         0
PC         1.00

```

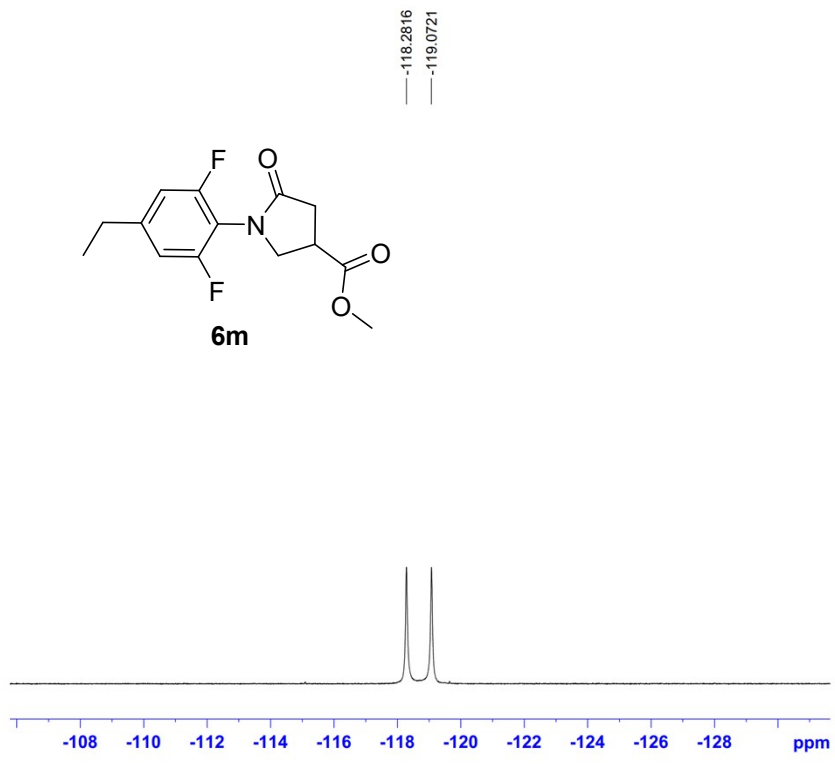

```

NAME      JOCamidine 6m
EXPNO    7
PROCNO    1
Date_     20190621
Time      17.28
INSTRUM   spect
PROBHD    5 mm PABBO BB-
PULPROG   zgfhigqn
TD         131072
SOLVENT   CDCl3
NS         32
DS         4
SWH        75187.969 Hz
FIDRES     0.573639 Hz
AQ         0.8716788 sec
RG         4096
DW         6.650 usec
DE         6.50 usec
TE         300.0 K
D1         1.00000000 sec
D11        0.03000000 sec
D12        0.00002000 sec
TDO        1
===== CHANNEL f1 =====
NUC1      19F
P1        15.00 usec
PL1       3.21 dB
SFO1      376.4682462 MHz
===== CHANNEL f2 =====
CPDPRG2   waltz16
NUC2      1H
PCPD2     80.00 usec
PL2       0.00 dB
PL12      13.71 dB
PL12W     15.07131863 W
PL12W     0.64143294 W
SFO2      400.1316005 MHz
SI        65536
SF        376.4985532 MHz
WDW        EM
SSB        0
LB        0.30 Hz
GB         0
PC         1.00

```

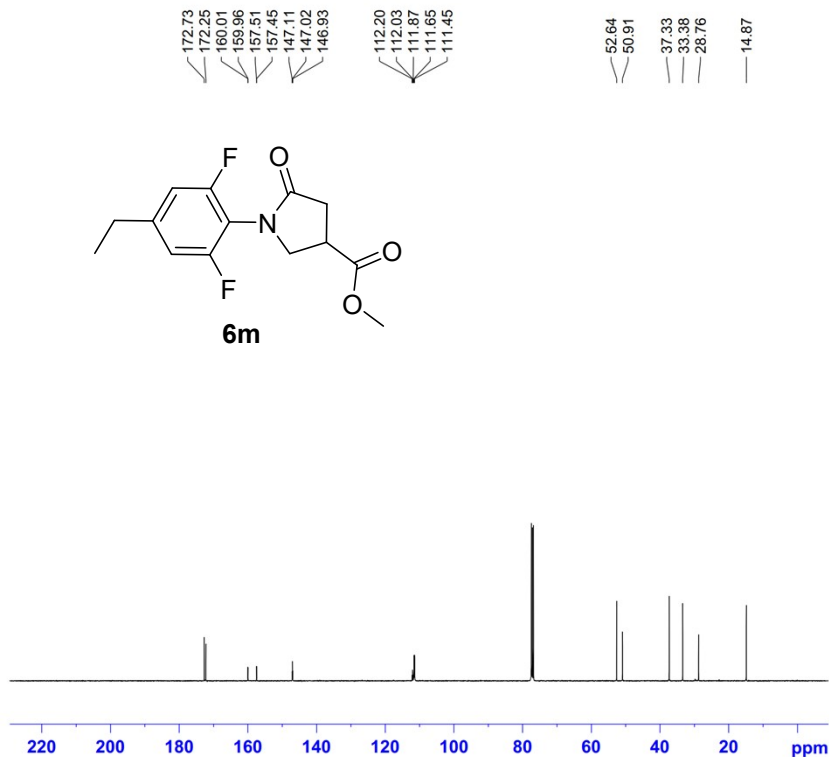

```

NAME      JOCamideine 6m
EXPNO     5
PROCNO    1
Date_     20190702
Time      0.48
INSTRUM   spect
PROBHD    5 mm PABBO BB-
PULPROG   zgpg30
TD         65536
SOLVENT   CDCl3
NS         2048
DS         4
SWH        23980.814 Hz
FIDRES     0.365918 Hz
AQ         1.3664756 sec
RG         7298.2
DW         20.850 usec
DE         6.50 usec
TE         300.0 K
D1         2.00000000 sec
D11        0.03000000 sec
TD0        1
  
```

```

===== CHANNEL f1 =====
NUC1      13C
P1        24.00 usec
PL1       -2.00 dB
PL1W      59.71607590 W
SFO1      100.6238364 MHz
  
```

```

===== CHANNEL f2 =====
CPDPRG2   waltz16
NUC2       1H
PCPD2     80.00 usec
PL2        0.00 dB
PL12       13.71 dB
PL13       18.00 dB
PL2W      15.07131863 W
PL12W      0.64143294 W
PL13W      0.23886430 W
SFO2      400.1316005 MHz
SI         32768
SF         100.6127564 MHz
WDW        EM
SSB        0
LB         1.00 Hz
GB         0
PC         1.40
  
```

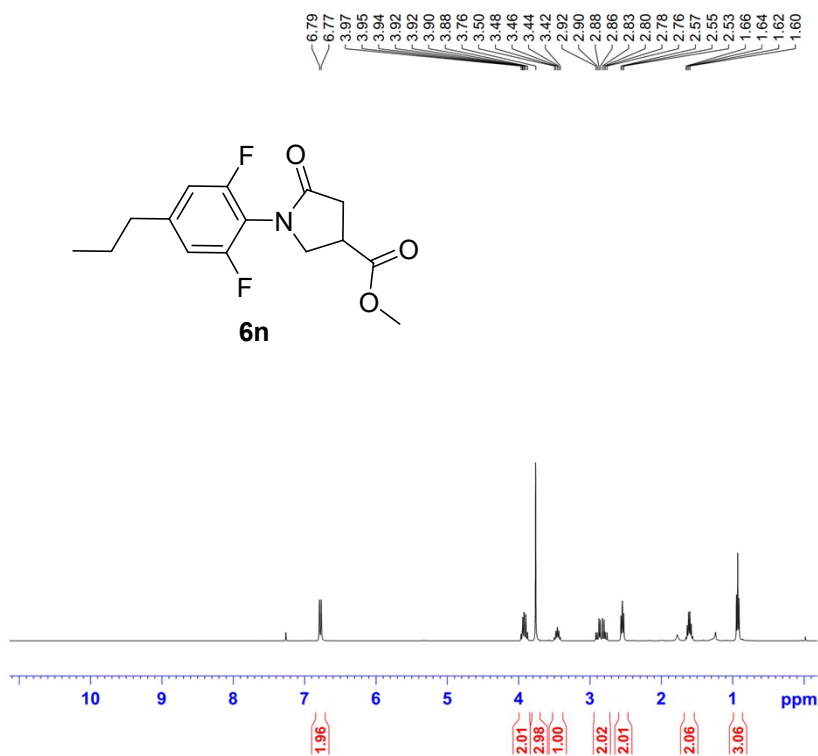

```

NAME      JOCamideine 6n
EXPNO     1
PROCNO    1
Date_     20160419
Time      9.29
INSTRUM   spect
PROBHD    5 mm PABBO BB-
PULPROG   zg30
TD         65536
SOLVENT   CDCl3
NS         16
DS         2
SWH        8278.146 Hz
FIDRES     0.126314 Hz
AQ         3.9584243 sec
RG         64
DW         60.400 usec
DE         6.50 usec
TE         300.0 K
D1         1.00000000 sec
TD0        1
  
```

```

===== CHANNEL f1 =====
NUC1      1H
P1        16.25 usec
PL1        0.00 dB
PL1W      15.07131863 W
SFO1      400.1324710 MHz
SI         32768
SF         400.1300089 MHz
WDW        EM
SSB        0
LB         0.30 Hz
GB         0
PC         1.00
  
```



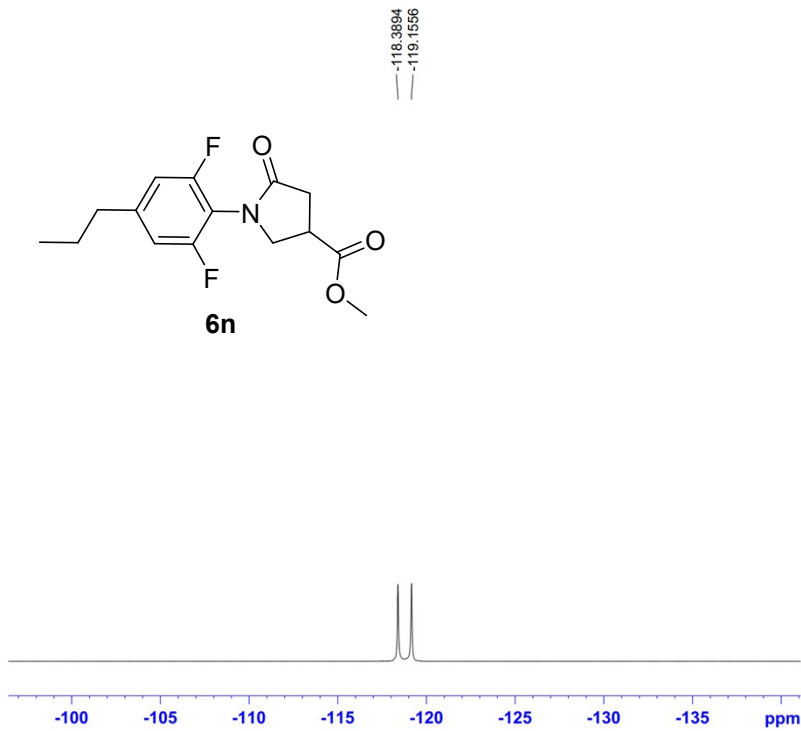

```

NAME      JOCamide 6n
EXPNO    7
PROCNO   1
Date_    20170109
Time     8.54
INSTRUM  spect
PROBHD   5 mm PABBO BB-
PULPROG  zgfhigqn
TD       131072
SOLVENT  CDCl3
NS       32
DS       4
SWH      75187.969 Hz
FIDRES   0.573639 Hz
AQ       0.8716788 sec
RG       1625.5
DW       6.650 usec
DE       6.50 usec
TE       300.0 K
D1       1.00000000 sec
D11      0.03000000 sec
D12      0.00002000 sec
TD0      1
  
```

```

===== CHANNEL f1 =====
NUC1     19F
P1       15.00 usec
PL1      3.21 dB
SFO1     376.4682462 MHz
  
```

```

===== CHANNEL f2 =====
CPDPRG2  waltz16
NUC2     1H
PCPD2    80.00 usec
PL2      0.00 dB
PL12     13.84 dB
PL2W     15.07131863 W
PL12W    0.62251705 W
SFO2     400.1316005 MHz
SI       65536
SF       376.4985429 MHz
WDW      EM
SSB      0
LB       0.30 Hz
GB       0
PC       1.00
  
```

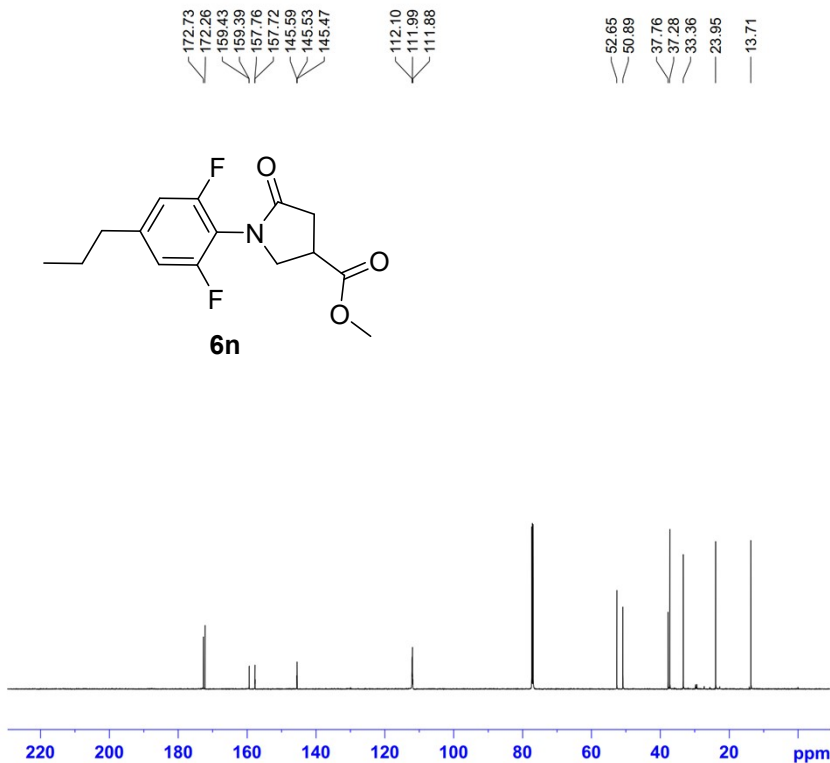

```

NAME      JOCamide 6n
EXPNO    5
PROCNO   1
Date_    20160420
Time     14.21
INSTRUM  spect
PROBHD   5 mm CPTCI 1H-
PULPROG  zgpg30
TD       65536
SOLVENT  CDCl3
NS       112
DS       4
SWH      36057.691 Hz
FIDRES   0.550197 Hz
AQ       0.9088159 sec
RG       107.97
DW       13.867 usec
DE       18.00 usec
TE       298.2 K
D1       2.00000000 sec
D11      0.03000000 sec
TD0      1
  
```

```

===== CHANNEL f1 =====
SFO1     150.9068340 MHz
NUC1     13C
P1       12.00 usec
SI       32768
SF       150.8902236 MHz
WDW      EM
SSB      0
LB       1.00 Hz
GB       0
PC       1.40
  
```

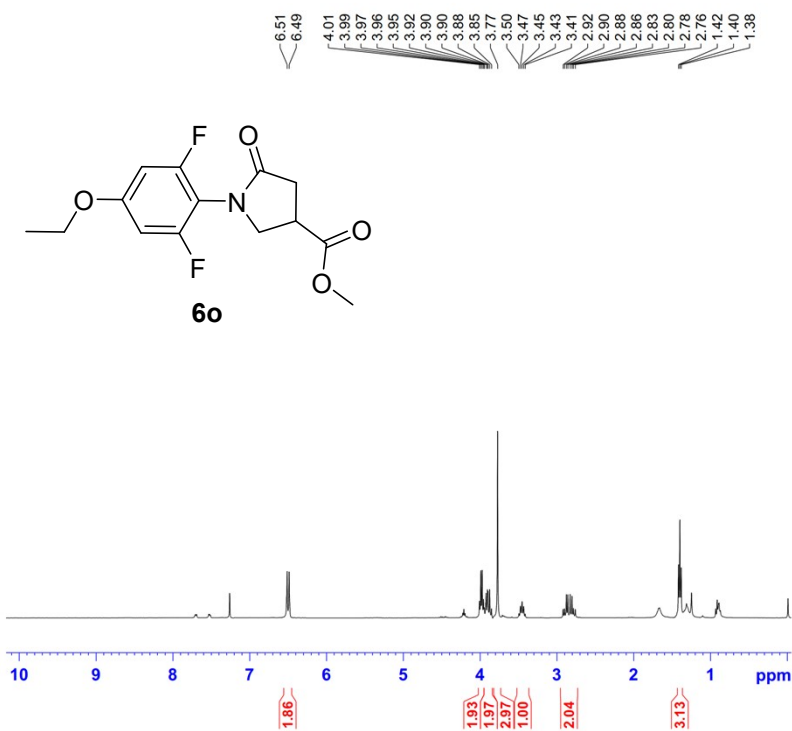

```

NAME      JOCamide 6o
EXPNO     1
PROCNO    1
Date_     20160406
Time      14.51
INSTRUM   spect
PROBHD    5 mm PABBO BB-
PULPROG   zg30
TD         65536
SOLVENT   CDCl3
NS         16
DS         2
SWH        8278.146 Hz
FIDRES     0.126314 Hz
AQ         3.9584243 sec
RG         128
DW         60.400 usec
DE         6.50 usec
TE         300.0 K
D1         1.0000000 sec
TD0        1
  
```

```

===== CHANNEL f1 =====
NUC1      1H
P1        16.25 usec
PL1       0.00 dB
PL1W      15.07131863 W
SFO1      400.1324710 MHz
SI        32768
SF        400.1300090 MHz
WDW       EM
SSB       0
LB        0.30 Hz
GB        0
PC        1.00
  
```

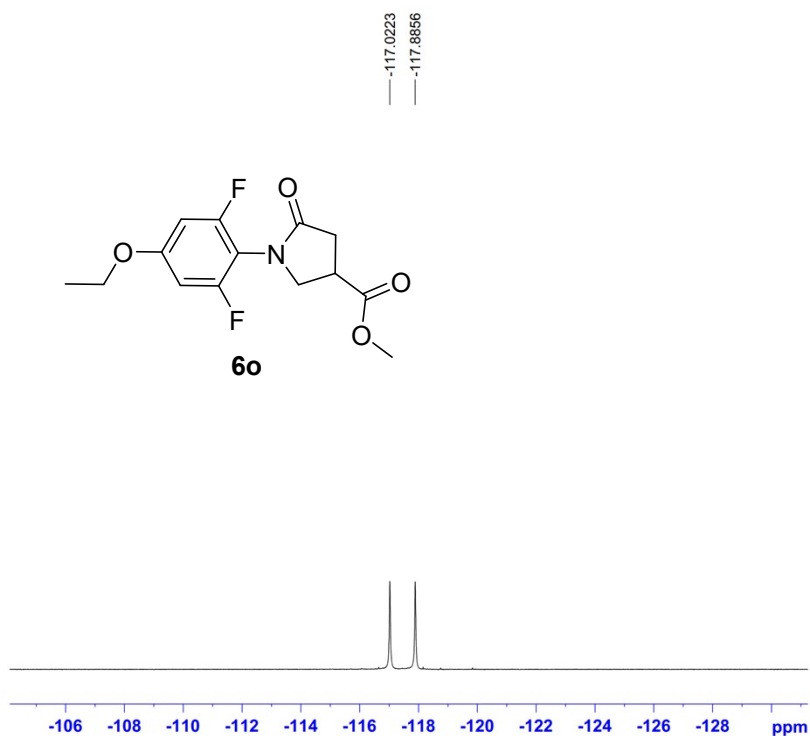

```

NAME      JOCamide 6o
EXPNO     7
PROCNO    1
Date_     20160406
Time      14.55
INSTRUM   spect
PROBHD    5 mm PABBO BB-
PULPROG   zgfhigqn
TD         131072
SOLVENT   CDCl3
NS         32
DS         4
SWH        75187.969 Hz
FIDRES     0.573639 Hz
AQ         0.8716788 sec
RG         2580.3
DW         6.650 usec
DE         6.50 usec
TE         300.0 K
D1         1.0000000 sec
D11        0.0300000 sec
D12        0.0000200 sec
TD0        1
  
```

```

===== CHANNEL f1 =====
NUC1      13C
P1        15.00 usec
PL1       3.21 dB
SFO1      376.4682462 MHz
  
```

```

===== CHANNEL f2 =====
CPDPRG2   waltz16
NUC2      1H
PCPD2     80.00 usec
PL2       0.00 dB
PL12      13.84 dB
PL12W     15.07131863 W
PL12W     0.62251705 W
SFO2      400.1316005 MHz
SI        65536
SF        376.4985509 MHz
WDW       EM
SSB       0
LB        0.30 Hz
GB        0
PC        1.00
  
```

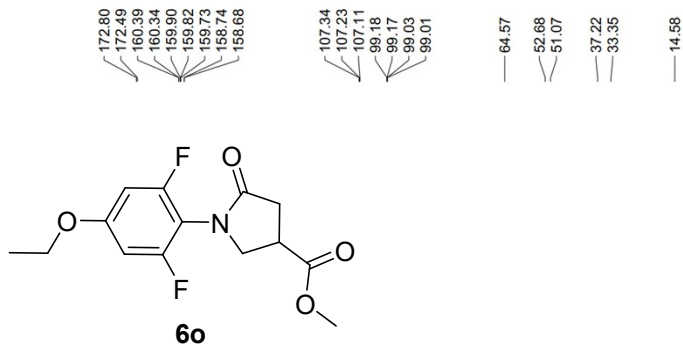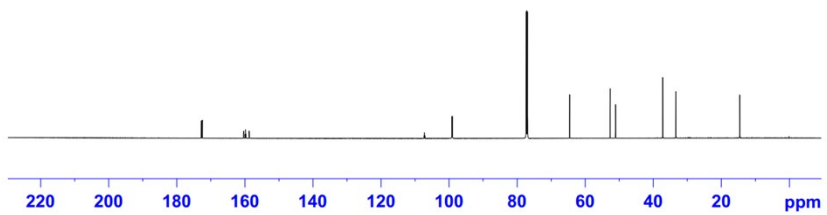

```

NAME      JOCamideine 6o
EXPNO    5
PROCNO    1
Date_     20160413
Time      8.41
INSTRUM   spect
PROBHD    5 mm CPTCI 1H-
PULPROG   zgpg30
TD         65536
SOLVENT   CDCl3
NS         486
DS         4
SWH        36057.691 Hz
FIDRES     0.550197 Hz
AQ          0.9088159 sec
RG          192.21
DW          13.867 usec
DE          18.00 usec
TE          298.2 K
D1          2.00000000 sec
D11         0.03000000 sec
TD0         1

===== CHANNEL f1 =====
SF01      150.9068340 MHz
NUC1       13C
P1         12.00 usec
SI         32768
SF         150.8902192 MHz
WDW        EM
SSB         0
LB          1.00 Hz
GB          0
PC          1.40

```

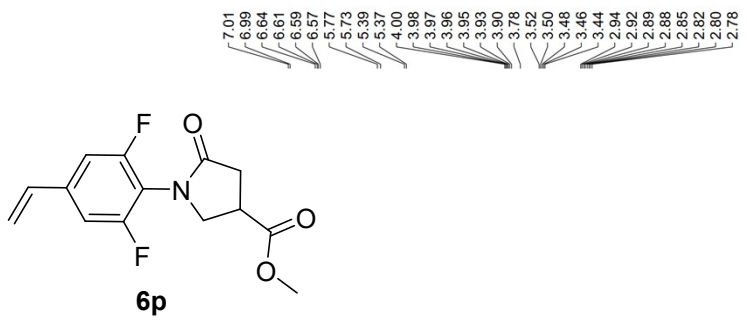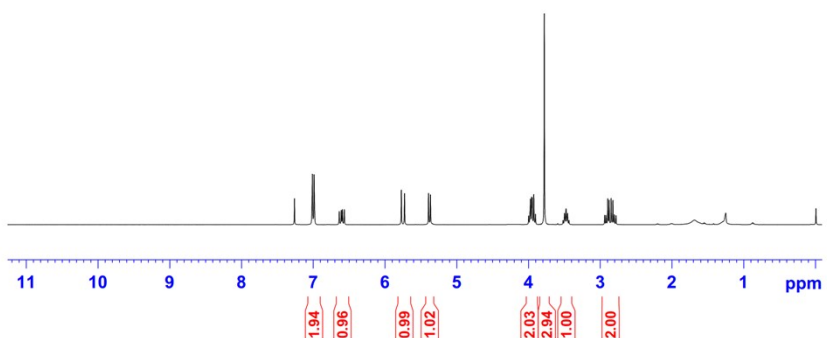

```

NAME      JOCamideine 6p
EXPNO    1
PROCNO    1
Date_     20160407
Time      8.10
INSTRUM   spect
PROBHD    5 mm PABBO BB-
PULPROG   zg30
TD         65536
SOLVENT   CDCl3
NS         16
DS         2
SWH        8278.146 Hz
FIDRES     0.126314 Hz
AQ          3.9884243 sec
RG          161.3
DW          60.400 usec
DE          6.50 usec
TE          300.0 K
D1          1.00000000 sec
TD0         1

===== CHANNEL f1 =====
NUC1       1H
P1         16.25 usec
PL1         0.00 dB
PL1W       15.07131863 W
SF01      400.1324710 MHz
SI         32768
SF         400.1300095 MHz
WDW        EM
SSB         0
LB          0.30 Hz
GB          0
PC          1.00

```

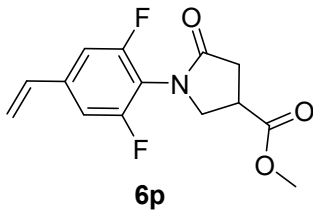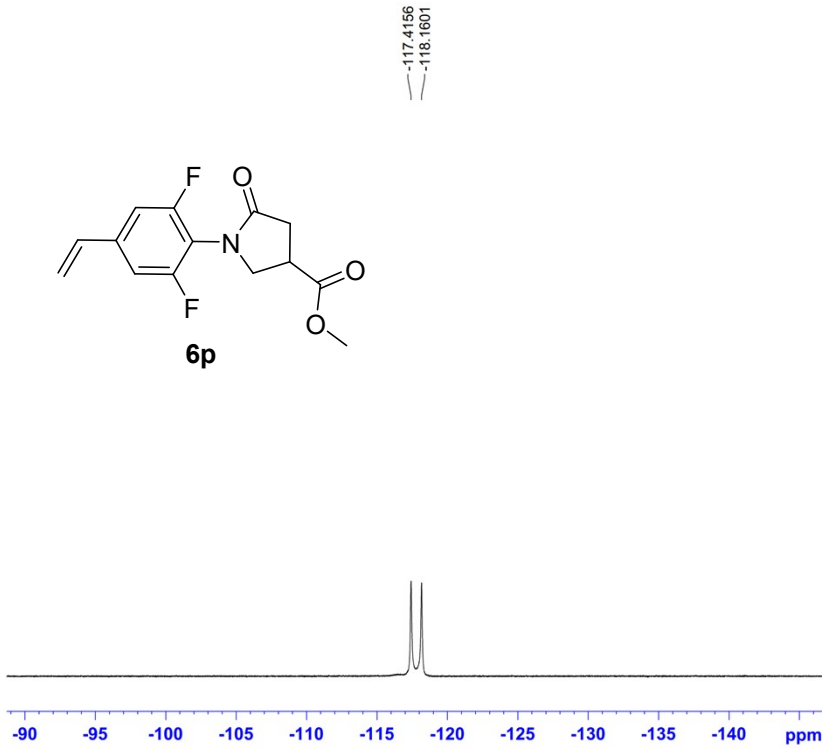

```

NAME      JOCamideine 6p
EXPNO    7
PROCNO   1
Date_    20190621
Time     15.35
INSTRUM  spect
PROBHD   5 mm PABBO BB-
PULPROG  zgfhiggn
TD       131072
SOLVENT  CDCl3
NS       32
DS       4
SWH      75187.969 Hz
FIDRES   0.573639 Hz
AQ       0.8716788 sec
RG       4096
DW       6.650 usec
DE       6.50 usec
TE       300.0 K
D1       1.00000000 sec
D11      0.03000000 sec
D12      0.00002000 sec
TD0      1

===== CHANNEL f1 =====
NUC1     19F
P1       15.00 usec
PL1      3.21 dB
SFO1     376.4682462 MHz

===== CHANNEL f2 =====
CPDPRG2  waltz16
NUC2     1H
PCPD2    80.00 usec
PL2      0.00 dB
PL12     13.71 dB
PL2W     15.07131863 W
PL12W    0.64143294 W
SFO2     400.1316005 MHz
SI       65536
SF       376.4985532 MHz
WDW      EM
SBB      0
LB       0.30 Hz
GB       0
PC       1.00

```

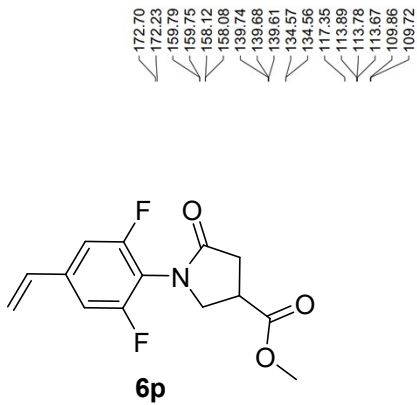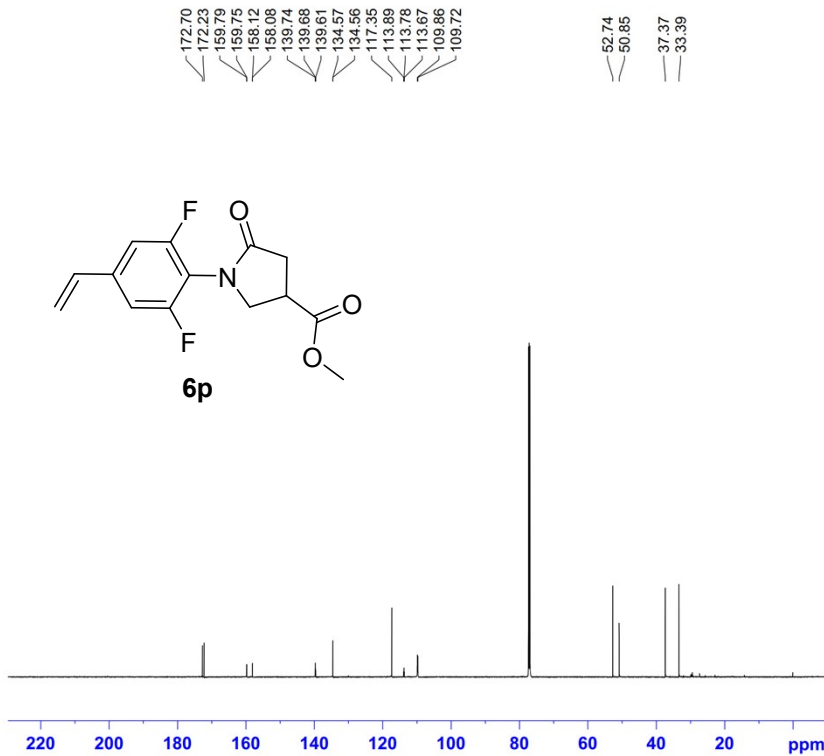

```

NAME      JOCamideine 6p
EXPNO    5
PROCNO   1
Date_    20160407
Time     9.50
INSTRUM  spect
PROBHD   5 mm CPTCE 1H-
PULPROG  zgpg30
TD       65536
SOLVENT  CDCl3
NS       256
DS       4
SWH      36057.691 Hz
FIDRES   0.550197 Hz
AQ       0.9088159 sec
RG       137.08
DW       13.867 usec
DE       18.00 usec
TE       298.2 K
D1       2.00000000 sec
D11      0.03000000 sec
TD0      1

===== CHANNEL f1 =====
SFO1     150.9068340 MHz
NUC1     13C
P1       12.00 usec
SI       32768
SF       150.8902181 MHz
WDW      EM
SBB      0
LB       1.00 Hz
GB       0
PC       1.40

```

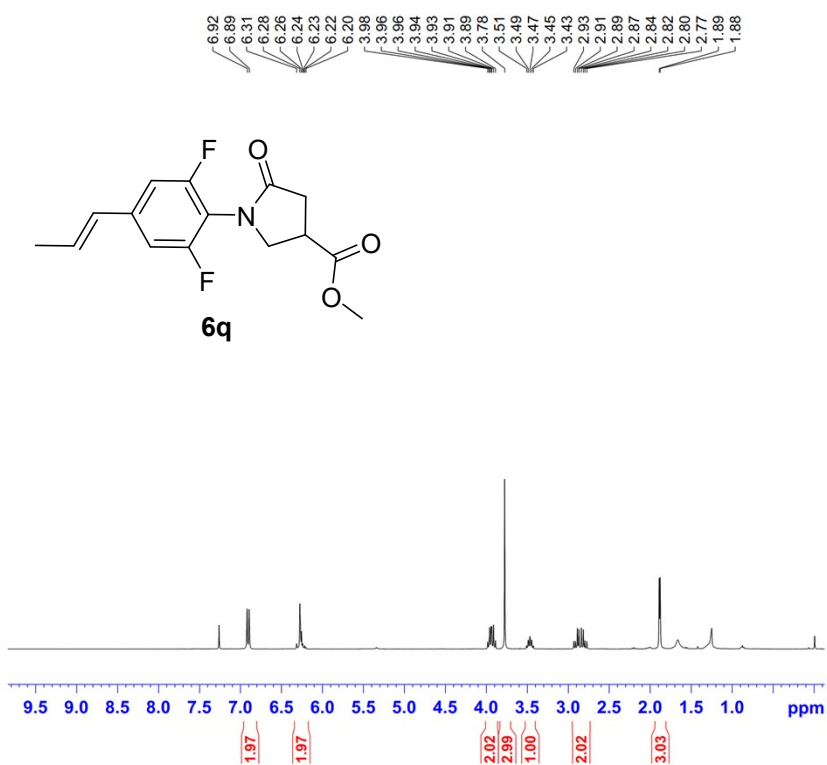

```

NAME      JOCamideine 6q
EXPNO     1
PROCNO    1
Date_     20160415
Time      10.43
INSTRUM   spect
PROBHD    5 mm PABBO BB-
PULPROG   zg30
TD        65536
SOLVENT   CDCl3
NS        16
DS        2
SWH       8278.146 Hz
FIDRES    0.126314 Hz
AQ        3.9584243 sec
RG        128
DW        60.400 usec
DE        6.50 usec
TE        300.0 K
D1        1.00000000 sec
D10       1
===== CHANNEL f1 =====
NUC1      1H
P1        16.25 usec
PL1       0.00 dB
PL1W      15.07131863 W
SFO1      400.1324710 MHz
SI        32768
SF        400.1300092 MHz
WDW       EM
SSB       0
LB        0.30 Hz
GB        0
PC        1.00

```

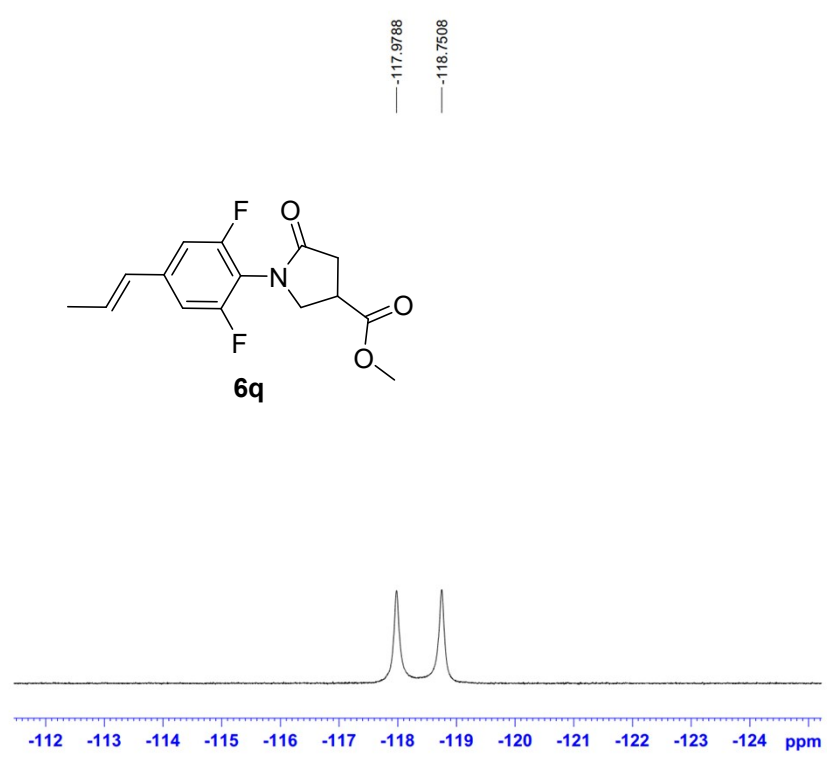

```

NAME      JOCamideine 6q
EXPNO     7
PROCNO    1
Date_     20170109
Time      8.18
INSTRUM   spect
PROBHD    5 mm PABBO BB-
PULPROG   zgFhiggn
TD        131072
SOLVENT   CDCl3
NS        32
DS        4
SWH       75187.969 Hz
FIDRES    0.573639 Hz
AQ        0.8716788 sec
RG        4096
DW        6.650 usec
DE        6.50 usec
TE        300.0 K
D1        1.00000000 sec
D11       0.03000000 sec
D12       0.00002000 sec
D10       1
===== CHANNEL f1 =====
NUC1      13F
P1        15.00 usec
PL1       3.21 dB
SFO1      376.4682462 MHz
===== CHANNEL f2 =====
CPDPRG2   waltz16
NUC2      1H
PCPD2     80.00 usec
PL2       0.00 dB
PL12      13.84 dB
PL2W      15.07131863 W
PL12W     0.62251705 W
SFO2      400.1316005 MHz
SI        65536
SF        376.4985544 MHz
WDW       EM
SSB       0
LB        0.30 Hz
GB        0
PC        1.00

```

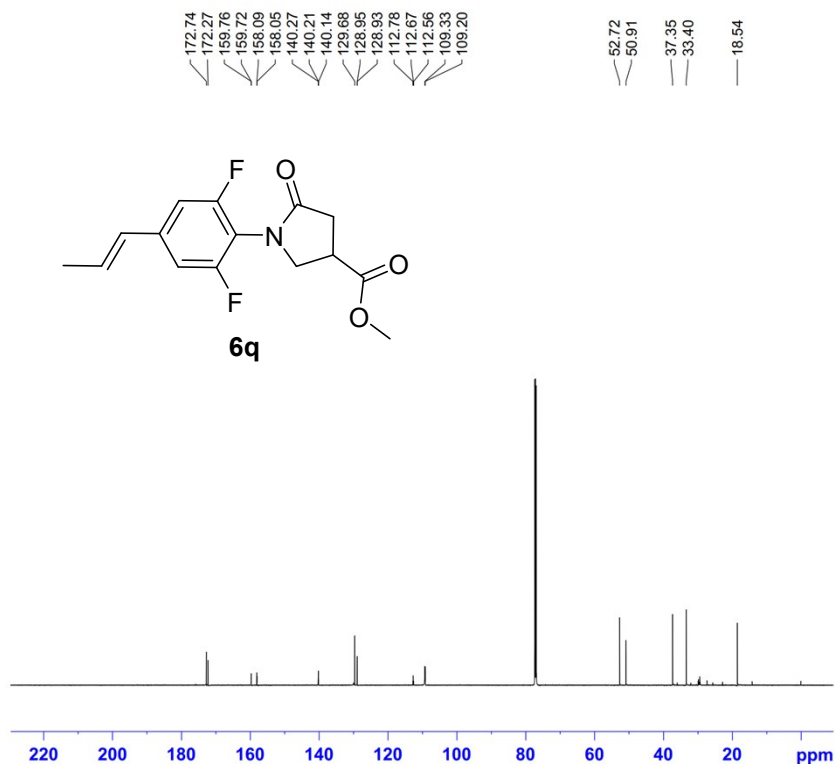

```

NAME      JOCamidine 6q
EXPNO    5
PROCNO   1
Date_    20160415
Time     14.18
INSTRUM  spect
PROBHD   5 mm CPTCI 1H-
PULPROG  zgpg30
TD       65536
SOLVENT  CDCl3
NS       351
DS       4
SWH      36057.691 Hz
FIDRES   0.550197 Hz
AQ       0.9088159 sec
RG       137.08
DW       13.867 usec
DE       18.00 usec
TE       298.2 K
D1       2.0000000 sec
D11     0.0300000 sec
TDO     1

```

```

===== CHANNEL f1 =====
SF01   150.9068340 MHz
NUC1    13C
P1      12.00 usec
SI      32768
SF      150.8902181 MHz
WDW     EM
SSB     0
LB      1.00 Hz
GB      0
PC      1.40

```

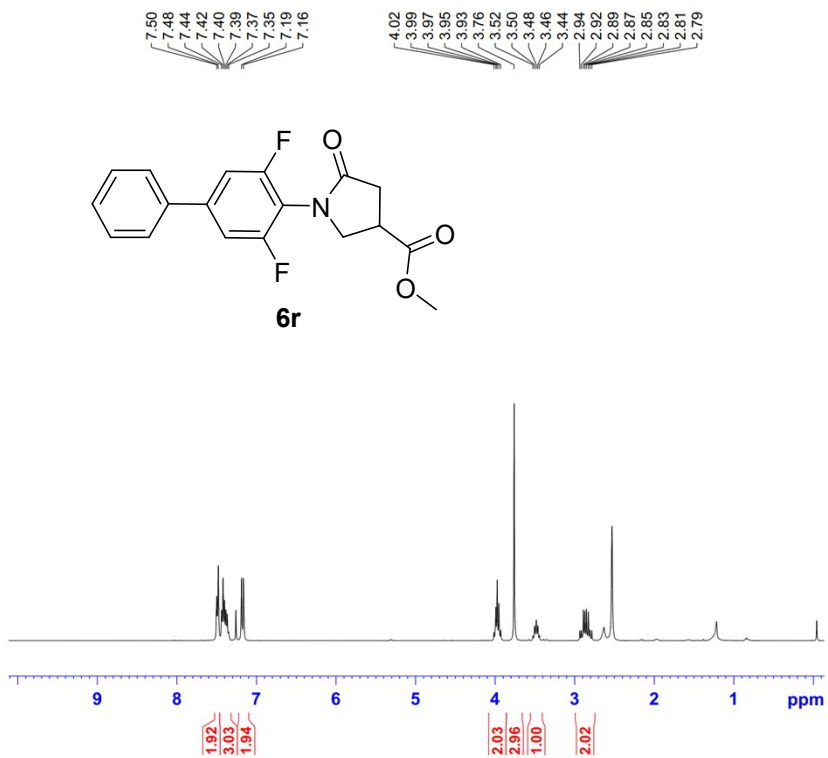

```

NAME      JOCamidine 6r
EXPNO    1
PROCNO   1
Date_    20160406
Time     9.03
INSTRUM  spect
PROBHD   5 mm PABBO BB-
PULPROG  zg30
TD       65536
SOLVENT  CDCl3
NS       16
DS       2
SWH      8278.146 Hz
FIDRES   0.126314 Hz
AQ       3.9584243 sec
RG       128
DW       60.400 usec
DE       6.50 usec
TE       300.0 K
D1       1.0000000 sec
TDO     1

```

```

===== CHANNEL f1 =====
NUC1    1H
P1      16.25 usec
PL1     0.00 dB
PL1W    15.07131863 W
SF01   400.1324710 MHz
SI      32768
SF      400.1300089 MHz
WDW     EM
SSB     0
LB      0.30 Hz
GB      0
PC      1.00

```

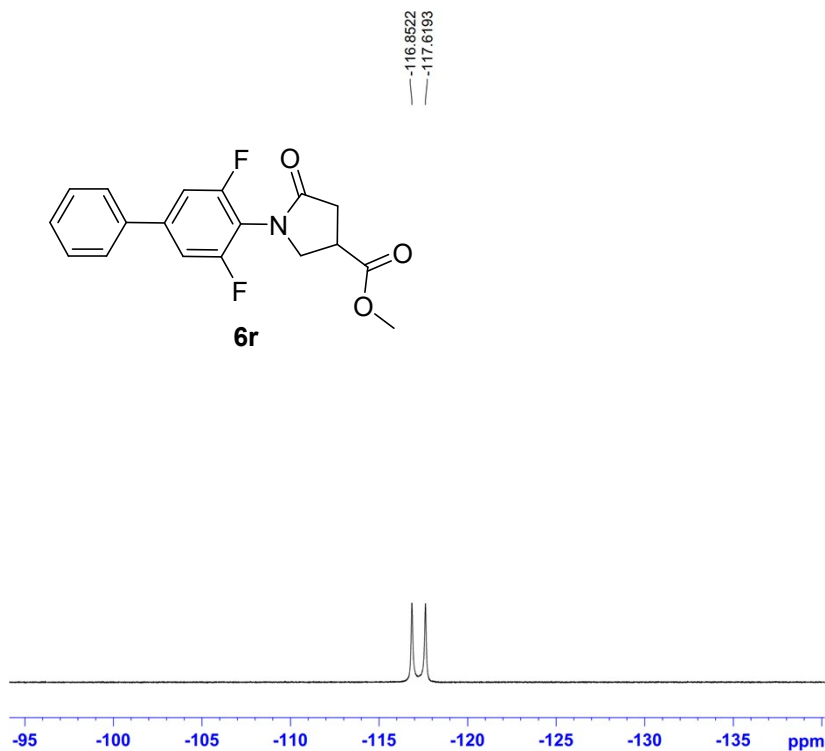

```

NAME      JOCamideine 6r
EXPNO     1
PROCNO    1
Date_     20170109
Time      9.02
INSTRUM   spect
PROBHD    5 mm PABBO BB-
FULPROG   zgfhigqn
TD         131072
SOLVENT   CDCl3
NS         32
DS         4
SWH        75187.969 Hz
FIDRES     0.573639 Hz
AQ         0.8716788 sec
RG         4096
DW         6.650 usec
DE         6.50 usec
TE         300.0 K
D1         1.00000000 sec
D11        0.03000000 sec
D12        0.00002000 sec
TD0        1
  
```

```

===== CHANNEL f1 =====
NUC1      19F
P1        15.00 usec
PL1       3.21 dB
SFO1      376.4682462 MHz
  
```

```

===== CHANNEL f2 =====
CPDPRG2   waltz16
NUC2       1H
PCPD2     80.00 usec
PL2        0.00 dB
PL12      13.84 dB
PL2W      15.07131863 W
PL12W     0.62251705 W
SFO2      400.1316005 MHz
SI         65536
SF         376.4985578 MHz
WDW        EM
SSB        0
LB         0.30 Hz
GB         0
PC         1.00
  
```

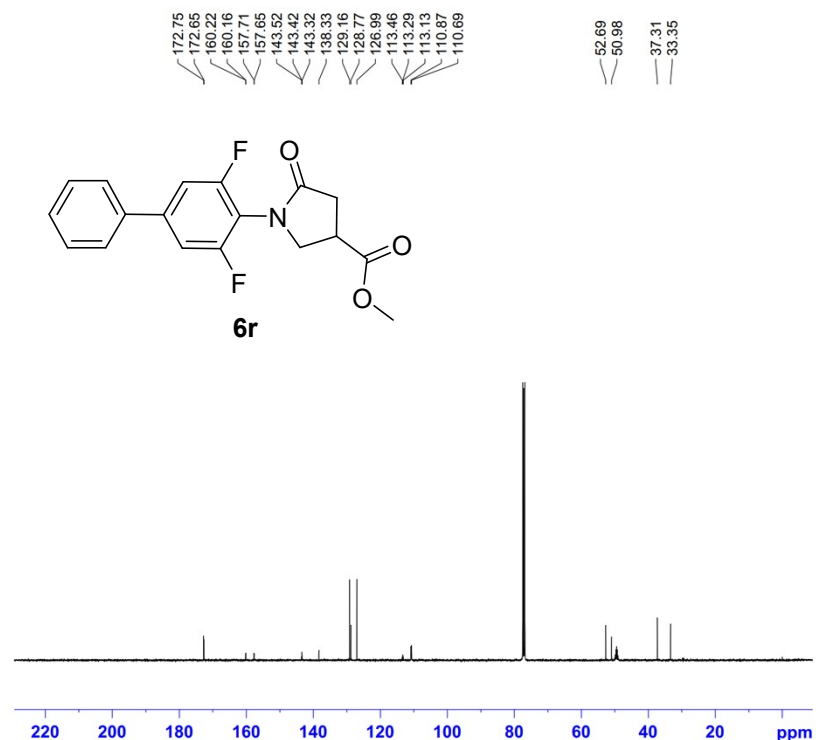

```

NAME      JOCamideine 6r
EXPNO     5
PROCNO    1
Date_     20160406
Time      13.28
INSTRUM   spect
PROBHD    5 mm PABBO BB-
FULPROG   zgpg30
TD         65536
SOLVENT   CDCl3
NS         1160
DS         4
SWH        23980.814 Hz
FIDRES     0.365918 Hz
AQ         1.3664756 sec
RG         8192
DW         20.850 usec
DE         6.50 usec
TE         300.0 K
D1         2.00000000 sec
D11        0.03000000 sec
TD0        1
  
```

```

===== CHANNEL f1 =====
NUC1      13C
P1        15.50 usec
PL1       -1.23 dB
PL1W      50.01396179 W
SFO1      100.6238364 MHz
  
```

```

===== CHANNEL f2 =====
CPDPRG2   waltz16
NUC2       1H
PCPD2     80.00 usec
PL2        0.00 dB
PL12      13.84 dB
PL13      18.00 dB
PL2W      15.07131863 W
PL12W     0.62251705 W
PL13W     0.23886430 W
SFO2      400.1316005 MHz
SI         32768
SF         100.6127596 MHz
WDW        EM
SSB        0
LB         1.00 Hz
GB         0
PC         1.40
  
```

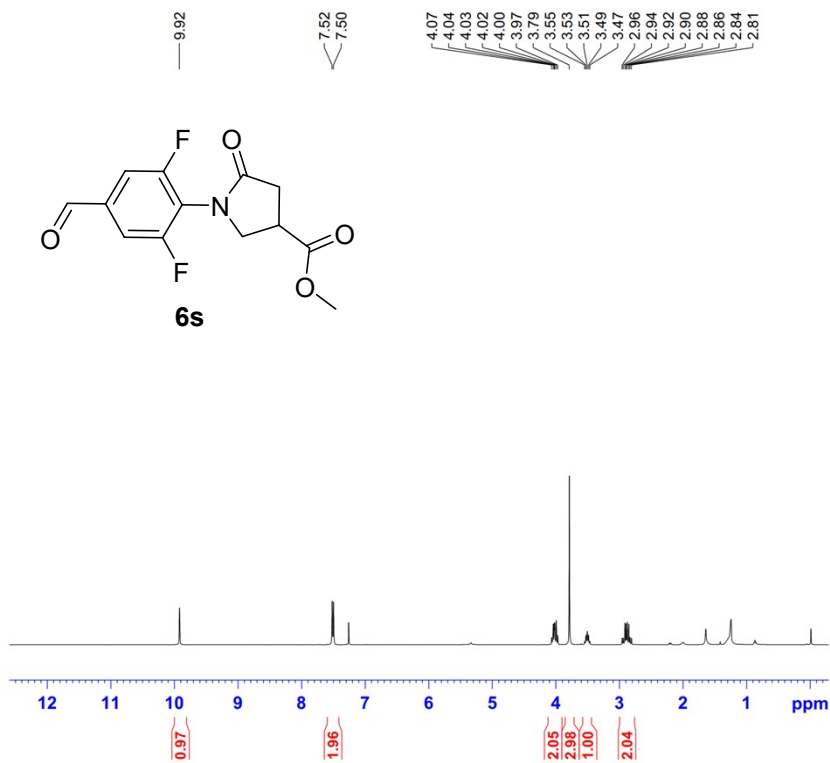

```

NAME      JOCamide 6s
EXPNO     1
PROCNO    1
Date_     20160425
Time      10.19
INSTRUM   spect
PROBHD    5 mm PABBO BB-
PULPROG   zg30
TD        65536
SOLVENT   CDCl3
NS        16
DS        2
SWH       8278.146 Hz
FIDRES    0.126314 Hz
AQ        3.9584243 sec
RG        191
DW        60.400 usec
DE        6.50 usec
TE        300.0 K
D1        1.00000000 sec
TD0       1

===== CHANNEL f1 =====
NUC1      1H
P1        16.25 usec
PL1       0.00 dB
PL1W     15.07131863 W
SF01     400.1324710 MHz
SI        32768
SF        400.1300095 MHz
WDW       EM
SSB       0
LB        0.30 Hz
GB        0
PC        1.00

```

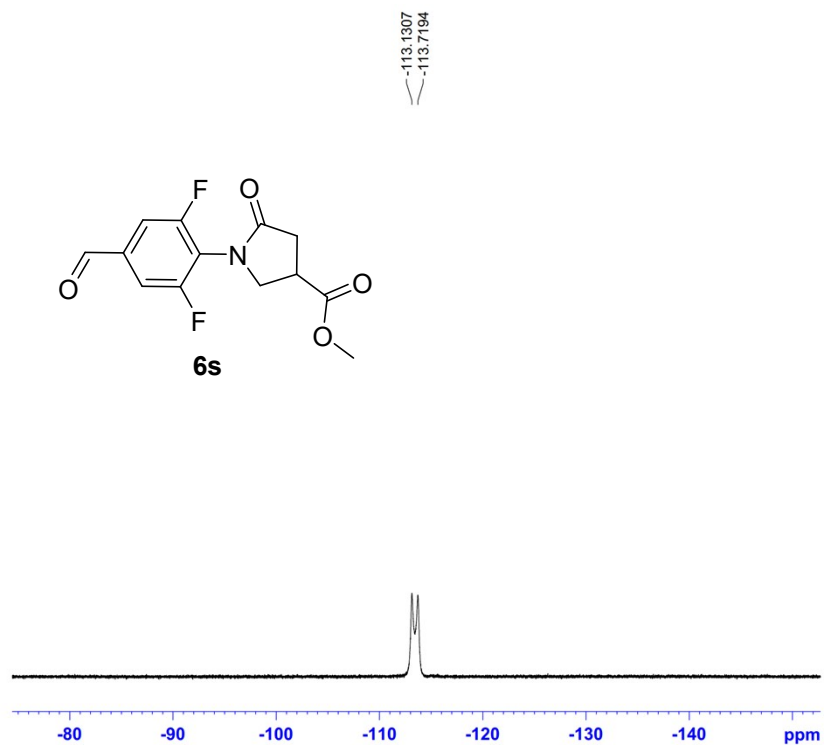

```

NAME      JOCamide 6s
EXPNO     7
PROCNO    1
Date_     20170109
Time      9.15
INSTRUM   spect
PROBHD    5 mm PABBO BB-
PULPROG   zgfhgqn
TD        131072
SOLVENT   CDCl3
NS        32
DS        4
SWH       75187.969 Hz
FIDRES    0.573639 Hz
AQ        0.8716788 sec
RG        2896.3
DW        6.650 usec
DE        6.50 usec
TE        300.0 K
D1        1.00000000 sec
D11       0.03000000 sec
D12       0.00002000 sec
TD0       1

===== CHANNEL f1 =====
NUC1      13C
P1        15.00 usec
PL1       3.21 dB
SF01     376.4682462 MHz

===== CHANNEL f2 =====
CPDPRG2   waltz16
NUC2      1H
PCPD2     80.00 usec
PL2       0.00 dB
PL12     13.84 dB
PL2W     15.07131863 W
PL12W    0.62251705 W
SFO2     400.1316005 MHz
SI        65536
SF        376.4985521 MHz
WDW       EM
SSB       0
LB        0.30 Hz
GB        0
PC        1.00

```



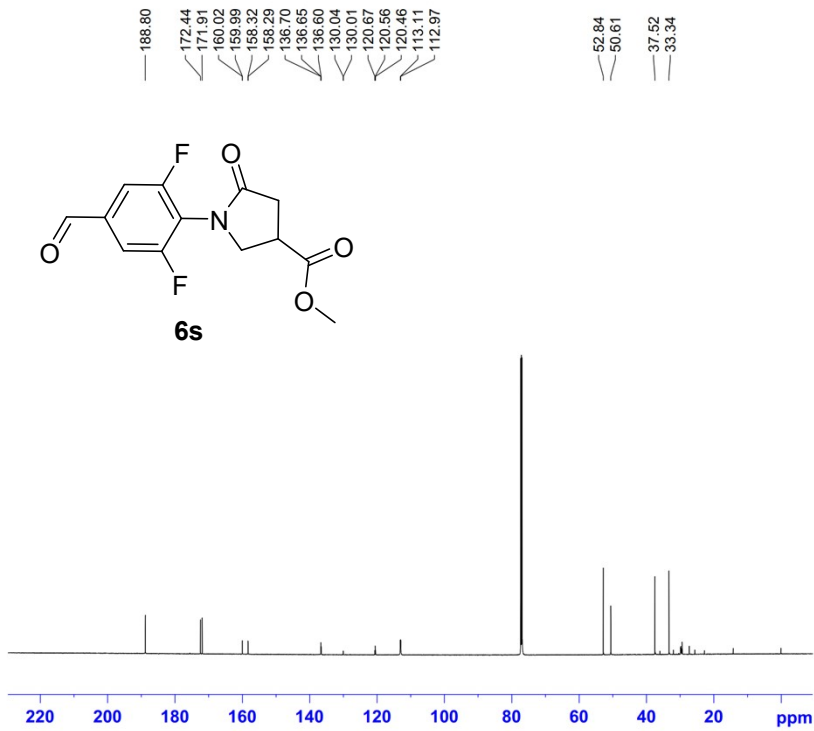

```

NAME      JOCamide 6s
EXPNO    5
PROCNO    1
Date_     20160426
Time      9.13
INSTRUM   spect
PROBHD    5 mm CPTCI 1H-
PULPROG   zgpg30
TD         65536
SOLVENT   CDCl3
NS         693
DS         4
SWH        36057.691 Hz
FIDRES     0.550197 Hz
AQ          0.9088159 sec
RG          107.97
DW          13.867 usec
DE          18.00 usec
TE          298.2 K
D1          2.0000000 sec
D11         0.0300000 sec
TD0         1
  
```

```

===== CHANNEL f1 =====
SFO1      150.9068340 MHz
NUC1       13C
P1         12.00 usec
SI         32768
SF         150.8902181 MHz
WDW        EM
SSB         0
LB          1.00 Hz
GB          0
PC          1.40
  
```

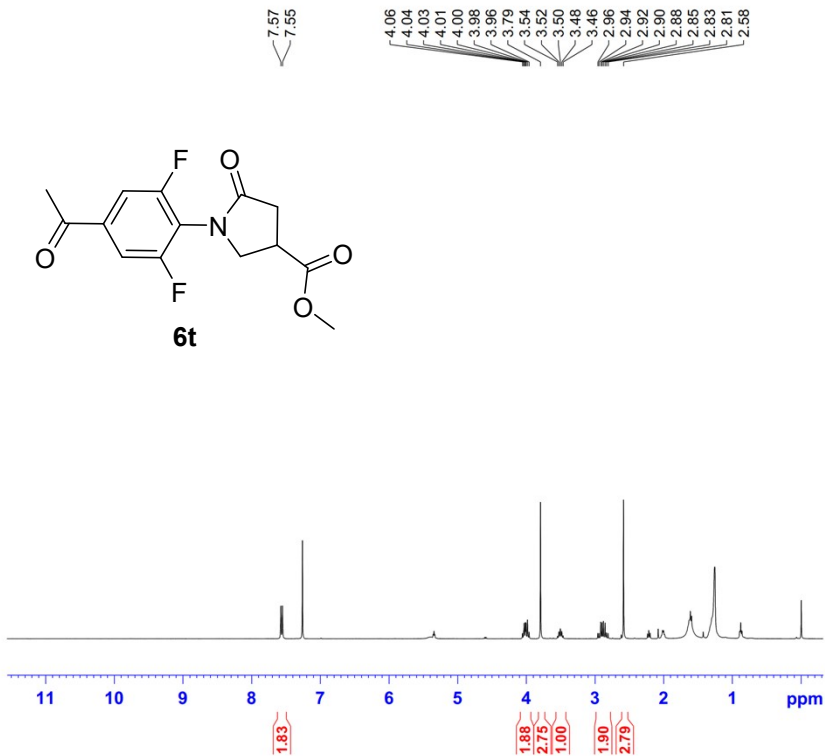

```

NAME      JOCamide 6t
EXPNO    1
PROCNO    1
Date_     20160420
Time      9.18
INSTRUM   spect
PROBHD    5 mm PABBO BB-
PULPROG   zg30
TD         65536
SOLVENT   CDCl3
NS         16
DS         2
SWH        8278.146 Hz
FIDRES     0.126314 Hz
AQ          3.9584243 sec
RG          228.1
DW          60.400 usec
DE          6.50 usec
TE          300.0 K
D1          1.0000000 sec
TD0         1
  
```

```

===== CHANNEL f1 =====
NUC1       1H
P1         16.25 usec
PL1         0.00 dB
PL1W       15.07131863 W
SFO1      400.1324710 MHz
SI         32768
SF         400.1300090 MHz
WDW        EM
SSB         0
LB          0.30 Hz
GB          0
PC          1.00
  
```

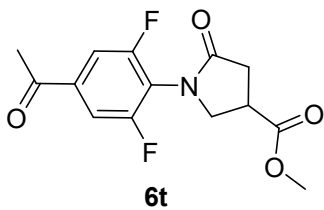

-114.2161  
-114.8437

```

NAME      JOCamide 6t
EXPNO     7
PROCNO    1
Date_     20170109
Time      8.38
INSTRUM   spect
PROBHD    5 mm PABBO BB-
PULPROG   zgpg30
TD        65536
SOLVENT   CDC13
NS        32
DS        4
SWH       75187.869 Hz
FIDRES    0.573839 Hz
AQ        0.8716788 sec
RG        4096
DW        6.650 usec
DE        6.50 usec
TE        300.0 K
D1        1.0000000 sec
D11       0.0300000 sec
D12       0.0000200 sec
TD0       1
  
```

```

===== CHANNEL f1 =====
NUC1      19F
P1        15.00 usec
PL1       3.21 dB
SFO1     376.4682462 MHz
  
```

```

===== CHANNEL f2 =====
CPDPRG2   waltz16
NUC2      1H
PCPD2     80.00 usec
PL2       0.00 dB
PL12      13.84 dB
PL2W      15.07131863 W
PL12W     0.62251705 W
SFO2     400.1316005 MHz
SI        65536
SF        376.4985578 MHz
WDW       EM
SSB       0
LB        0.30 Hz
GB        0
PC        1.00
  
```

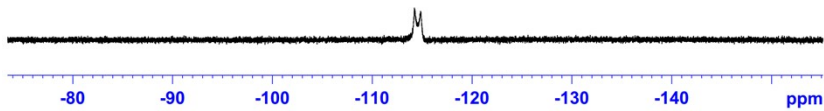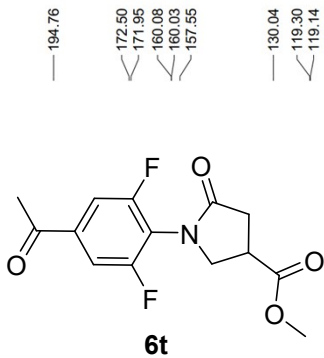

194.76  
172.50  
171.95  
160.08  
160.03  
157.55  
130.04  
119.30  
119.14  
112.31  
112.13  
52.82  
50.67  
37.55  
33.38

```

NAME      JOCamide 6t
EXPNO     5
PROCNO    1
Date_     20160423
Time      0.26
INSTRUM   spect
PROBHD    5 mm PABBO BB-
PULPROG   zgpg30
TD        65536
SOLVENT   CDC13
NS        6144
DS        4
SWH       23980.814 Hz
FIDRES    0.365918 Hz
AQ        1.3664756 sec
RG        8192
DW        20.850 usec
DE        6.50 usec
TE        300.0 K
D1        2.0000000 sec
D11       0.0300000 sec
TD0       1
  
```

```

===== CHANNEL f1 =====
NUC1      13C
P1        15.50 usec
PL1       -1.23 dB
PL1W      50.01396179 W
SFO1     100.6238364 MHz
  
```

```

===== CHANNEL f2 =====
CPDPRG2   waltz16
NUC2      1H
PCPD2     80.00 usec
PL2       0.00 dB
PL12      13.84 dB
PL13      18.00 dB
PL2W      15.07131863 W
PL12W     0.62251705 W
PL13W     0.23886430 W
SFO2     400.1316005 MHz
SI        32768
SF        100.6127524 MHz
WDW       EM
SSB       0
LB        1.00 Hz
GB        0
PC        1.40
  
```

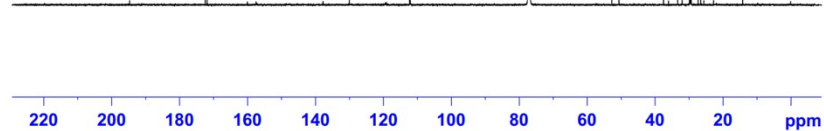

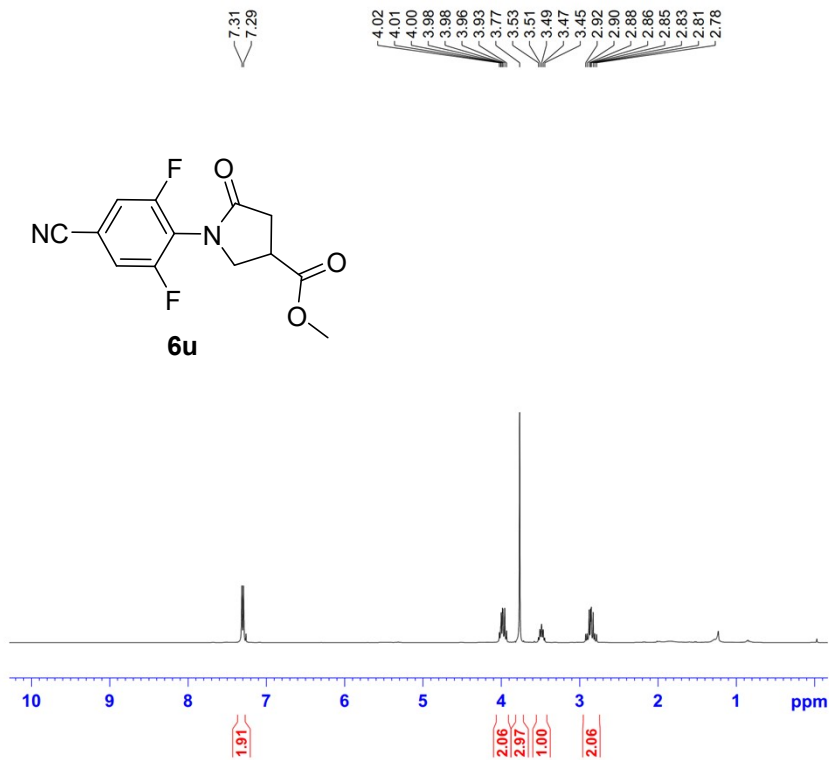

```

NAME      JOCamide 6u
EXPNO    1
PROCNO   1
Date_    20160401
Time     11.18
INSTRUM  spect
PROBHD   5 mm PABBO BB-
PULPROG  zg30
TD        65536
SOLVENT  CDC13
NS        16
DS        2
SWH       8278.146 Hz
FIDRES   0.126314 Hz
AQ        3.9584243 sec
RG        71.8
DW        60.400 usec
DE        6.50 usec
TE        300.0 K
D1        1.0000000 sec
TDO       1

```

```

===== CHANNEL f1 =====
NUC1     1H
P1       16.25 usec
PL1      0.00 dB
PL1W     15.07131863 W
SF01     400.1324710 MHz
SI        32768
SF       400.1300087 MHz
WDW      EM
SSB      0
LB       0.30 Hz
GB       0
PC       1.00

```

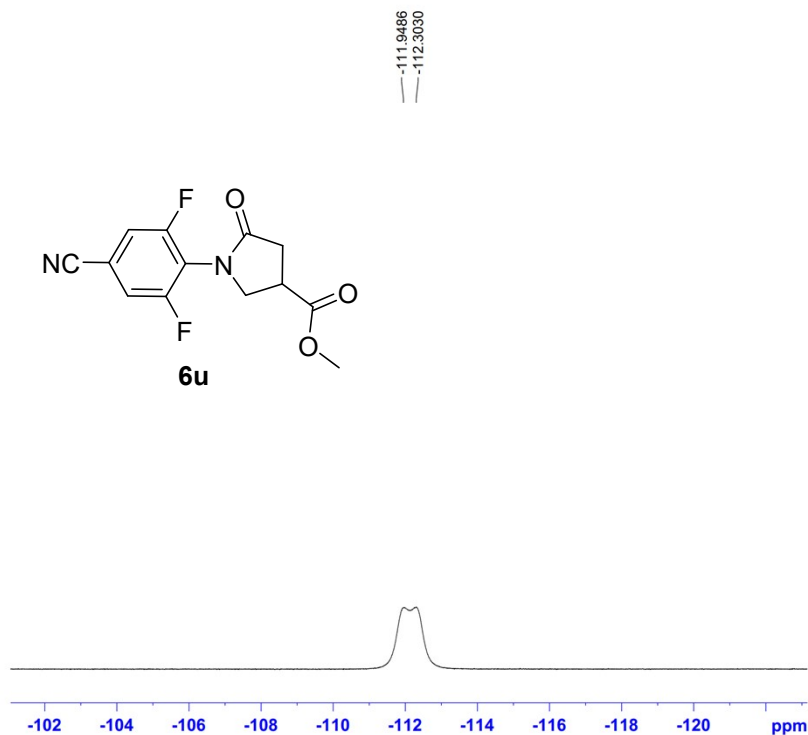

```

NAME      JOCamide 6u
EXPNO    7
PROCNO   1
Date_    20160401
Time     11.22
INSTRUM  spect
PROBHD   5 mm PABBO BB-
PULPROG  zgfglqgn
TD        131072
SOLVENT  CDC13
NS        32
DS        4
SWH       75187.969 Hz
FIDRES   0.573639 Hz
AQ        0.8716788 sec
RG        1290.2
DW        6.650 usec
DE        6.50 usec
TE        300.0 K
D1        1.0000000 sec
D11       0.0300000 sec
D12       0.0000200 sec
TDO       1

```

```

===== CHANNEL f1 =====
NUC1     13C
P1       15.00 usec
PL1      3.21 dB
SF01     376.4682462 MHz

```

```

===== CHANNEL f2 =====
CPDPRG2  waltz16
NUC2     1H
PCPD2    80.00 usec
PL2      0.00 dB
PL12     13.84 dB
PL12W    15.07131863 W
PL12W    0.62251705 W
SF02     400.1316005 MHz
SI        65536
SF       376.4985406 MHz
WDW      EM
SSB      0
LB       0.30 Hz
GB       0
PC       1.00

```

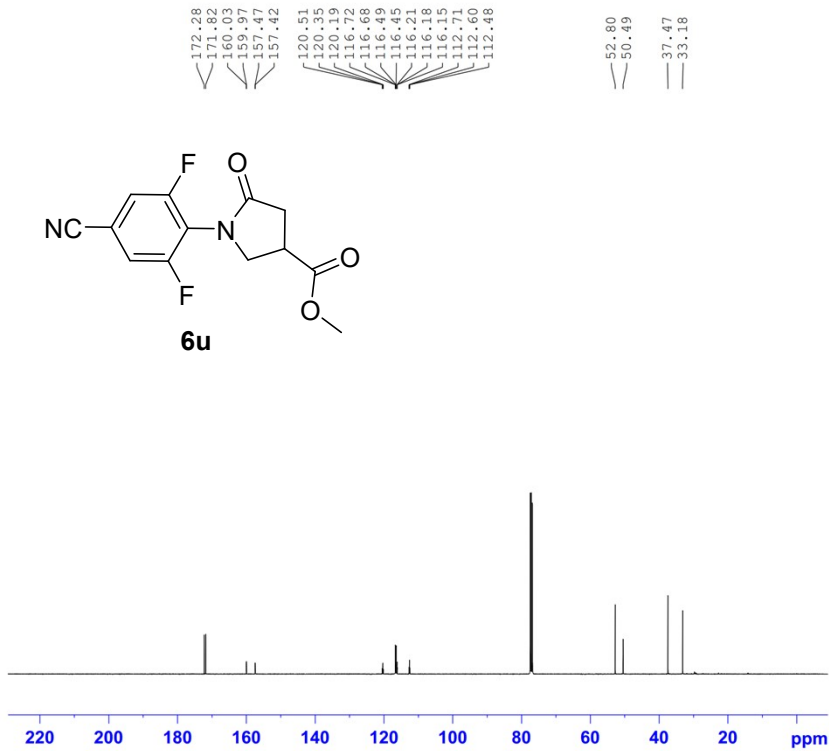

```

NAME      JOCamide 6u
EXPNO     5
PROCNO    1
Date_     20160217
Time      1.26
INSTRUM   spect
PROBHD    5 mm PABBO BB-
PULPROG   zgpg30
TD        65536
SOLVENT   CDCl3
NS        4096
DS        4
SWH       23980.814 Hz
FIDRES    0.365918 Hz
AQ        1.3664756 sec
RG        13004
DW        20.850 usec
DE        6.50 usec
TE        300.0 K
D1        2.00000000 sec
D11       0.03000000 sec
TDO       1

```

```

===== CHANNEL f1 =====
NUC1      13C
P1        15.50 usec
PL1       -1.23 dB
PL1W      50.01396179 W
SFO1      100.6238364 MHz

```

```

===== CHANNEL f2 =====
CPDPRG2   waltz16
NUC2      1H
PCPD2     80.00 usec
PL2       0.00 dB
PL12      13.84 dB
PL13      18.00 dB
PL2W      15.07131863 W
PL12W     0.62251705 W
PL13W     0.23886430 W
SFO2      400.1316005 MHz
SI        32768
SF        100.6127590 MHz
WDW       EM
SSB       0
LB        1.00 Hz
GB        0
PC        1.40

```

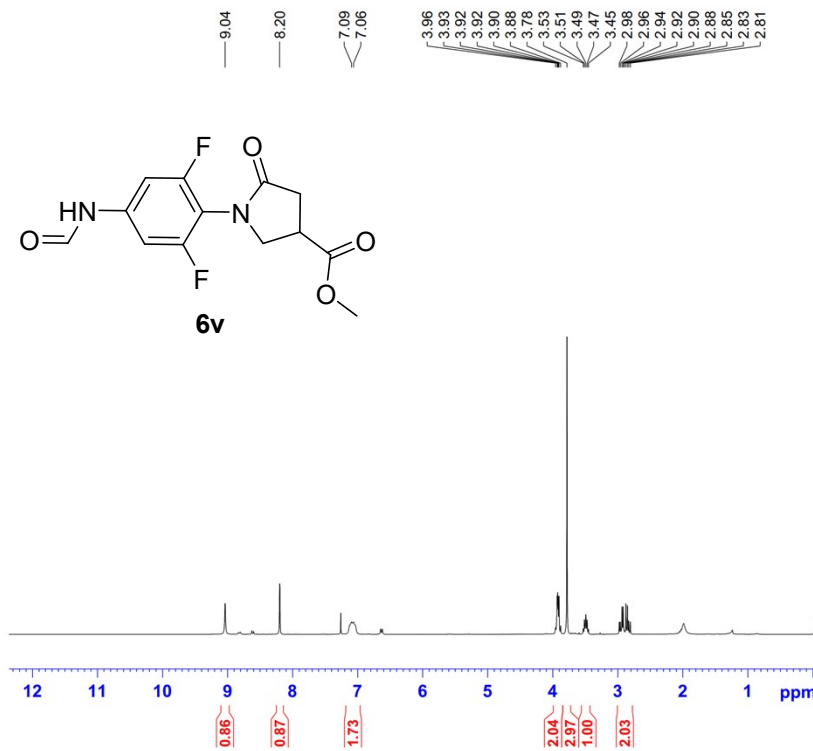

```

NAME      JOCamide 6v
EXPNO     1
PROCNO    1
Date_     20160525
Time      9.07
INSTRUM   spect
PROBHD    5 mm PABBO BB-
PULPROG   zg30
TD        65536
SOLVENT   CDCl3
NS        16
DS        2
SWH       8278.146 Hz
FIDRES    0.126314 Hz
AQ        3.9584243 sec
RG        114
DW        60.400 usec
DE        6.50 usec
TE        300.0 K
D1        1.00000000 sec
TDO       1

```

```

===== CHANNEL f1 =====
NUC1      1H
P1        16.25 usec
PL1       0.00 dB
PL1W      15.07131863 W
SFO1      400.1324710 MHz
SI        32768
SF        400.1300090 MHz
WDW       EM
SSB       0
LB        0.30 Hz
GB        0
PC        1.00

```

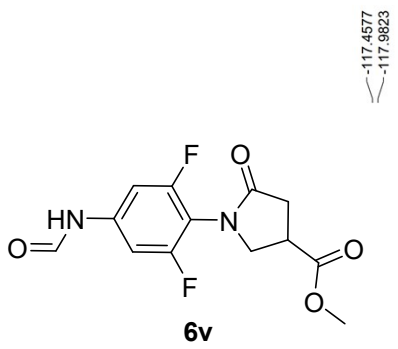

-117.4577  
-117.9823

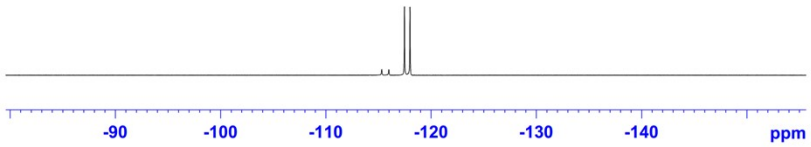

```

NAME      JOCamideine 6v
EXPNO    7
PROCNO   1
Date_    20160525
Time     9.11
INSTRUM  spect
PROBHD   5 mm PABBO BB-
PULPROG  zgfhiggn
TD       131072
SOLVENT  CDCl3
NS       32
DS       4
SWH      75187.969 Hz
FIDRES   0.573639 Hz
AQ       0.8716788 sec
RG       1625.5
DW       6.650 usec
DE       6.50 usec
TE       300.0 K
D1       1.00000000 sec
D11      0.03000000 sec
D12      0.00002000 sec
TD0      1

===== CHANNEL f1 =====
NUC1     19F
P1       15.00 usec
PL1      3.21 dB
SFO1     376.4682462 MHz

===== CHANNEL f2 =====
CPDPRG2  waltz16
NUC2     1H
PCPD2    80.00 usec
PL2      0.00 dB
PL12     13.84 dB
PL2W     15.07131863 W
PL12W    0.62251705 W
SFO2     400.1316005 MHz
SI       65536
SF       376.4985429 MHz
WDW      EM
SSB      0
LB       0.30 Hz
GB       0
PC       1.00

```

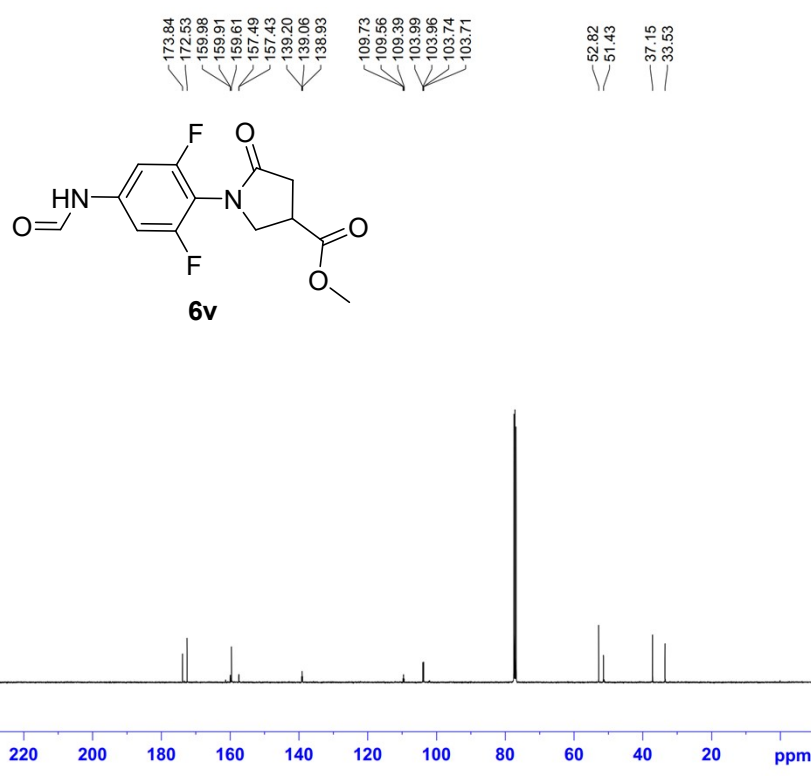

173.84  
172.53  
159.98  
159.91  
159.61  
157.49  
157.43  
139.20  
139.06  
138.93  
109.73  
109.56  
109.39  
103.99  
103.96  
103.74  
103.71  
52.82  
51.43  
37.15  
33.53

```

NAME      JOCamideine 6v
EXPNO    5
PROCNO   1
Date_    20160507
Time     11.58
INSTRUM  spect
PROBHD   5 mm PABBO BB-
PULPROG  zgpg30
TD       65536
SOLVENT  CDCl3
NS       2390
DS       4
SWH      23980.814 Hz
FIDRES   0.365918 Hz
AQ       1.3664756 sec
RG       8192
DW       20.850 usec
DE       6.50 usec
TE       300.0 K
D1       2.00000000 sec
D11      0.03000000 sec
TD0      1

===== CHANNEL f1 =====
NUC1     13C
P1       15.50 usec
PL1      -1.23 dB
PL1W     50.01396179 W
SFO1     100.6238364 MHz

===== CHANNEL f2 =====
CPDPRG2  waltz16
NUC2     1H
PCPD2    80.00 usec
PL2      0.00 dB
PL12     13.84 dB
PL13     18.00 dB
PL2W     15.07131863 W
PL12W    0.62251705 W
PL13W    0.23886430 W
SFO2     400.1316005 MHz
SI       32768
SF       100.6127553 MHz
WDW      EM
SSB      0
LB       1.00 Hz
GB       0
PC       1.40

```

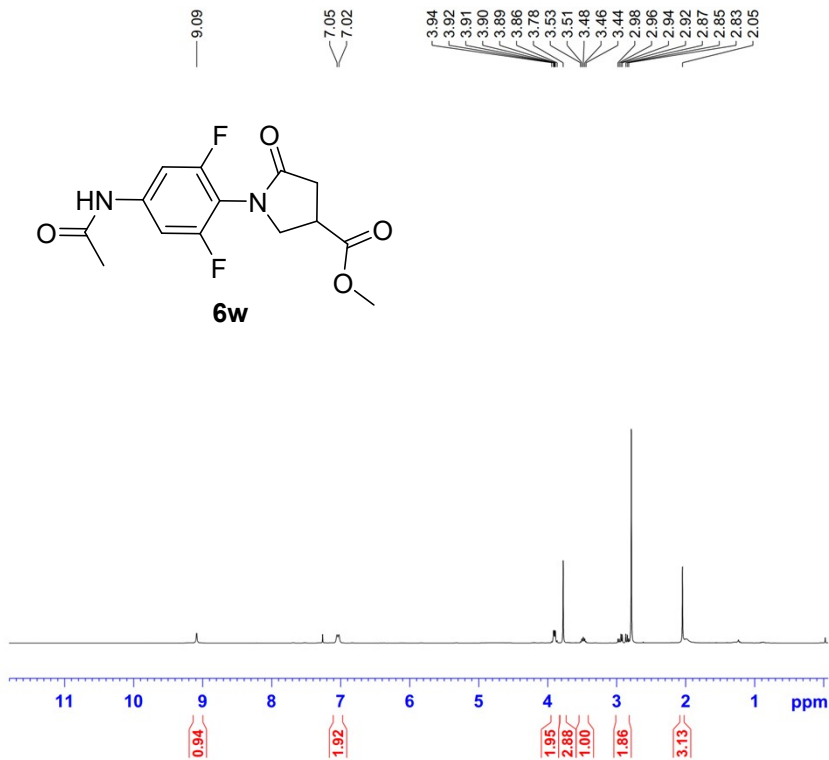

```

NAME      JOCamideine 6w
EXPNO    1
PROCNO   1
Date_    20160415
Time     13.02
INSTRUM  spect
PROBHD   5 mm PABBO BB-
PULPROG  zg30
TD        65536
SOLVENT  CDCl3
NS        16
DS        2
SWH       8278.146 Hz
FIDRES   0.126314 Hz
AQ        3.9584243 sec
RG        90.5
DW        60.400 usec
DE        6.50 usec
TE        300.0 K
D1        1.0000000 sec
D11       1
TD0       1

===== CHANNEL f1 =====
NUC1      1H
P1        16.25 usec
PL1       0.00 dB
PL1W      15.07131863 W
SF01      400.1324710 MHz
SI        32768
SF        400.1300090 MHz
WDW       EM
SSB       0
LB        0.30 Hz
GB        0
PC        1.00

```

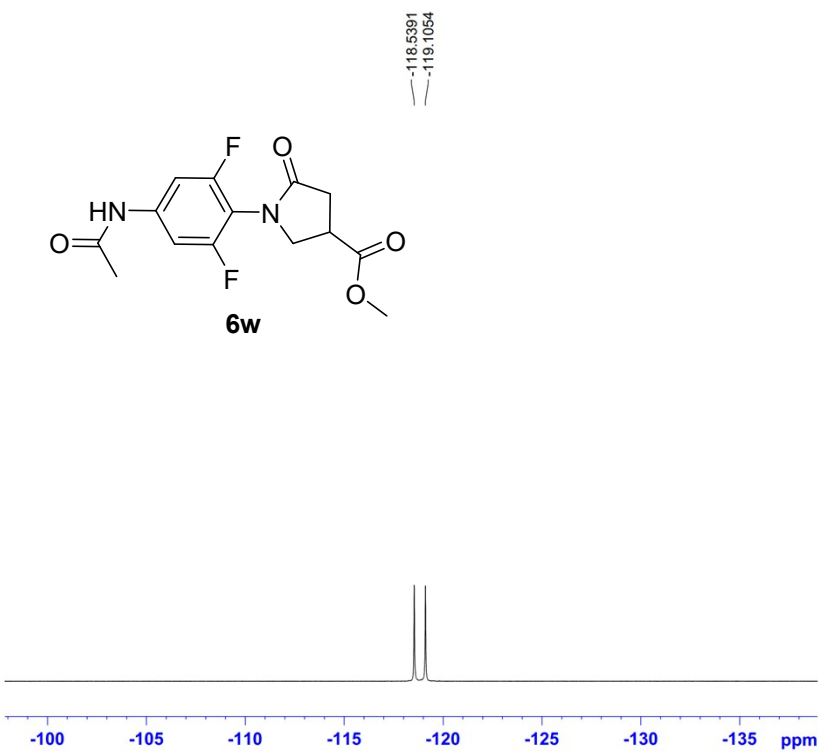

```

NAME      JOCamideine 6w
EXPNO    7
PROCNO   1
Date_    20160415
Time     13.06
INSTRUM  spect
PROBHD   5 mm PABBO BB-
PULPROG  zgfhgqn
TD        131072
SOLVENT  CDCl3
NS        32
DS        4
SWH       75187.969 Hz
FIDRES   0.573639 Hz
AQ        0.8716788 sec
RG        2580.3
DW        6.650 usec
DE        6.50 usec
TE        300.0 K
D1        1.0000000 sec
D11       0.0300000 sec
D12       0.0000200 sec
TD0       1

===== CHANNEL f1 =====
NUC1      13C
P1        15.00 usec
PL1       3.21 dB
SF01      376.4682462 MHz

===== CHANNEL f2 =====
CPDPRG2  waltz16
NUC2      1H
PCPD2    80.00 usec
PL2       0.00 dB
PL12     13.84 dB
PL12W    15.07131863 W
PL12W    0.62251705 W
SF02     400.1316005 MHz
SI        65536
SF        376.4985452 MHz
WDW       EM
SSB       0
LB        0.30 Hz
GB        0
PC        1.00

```

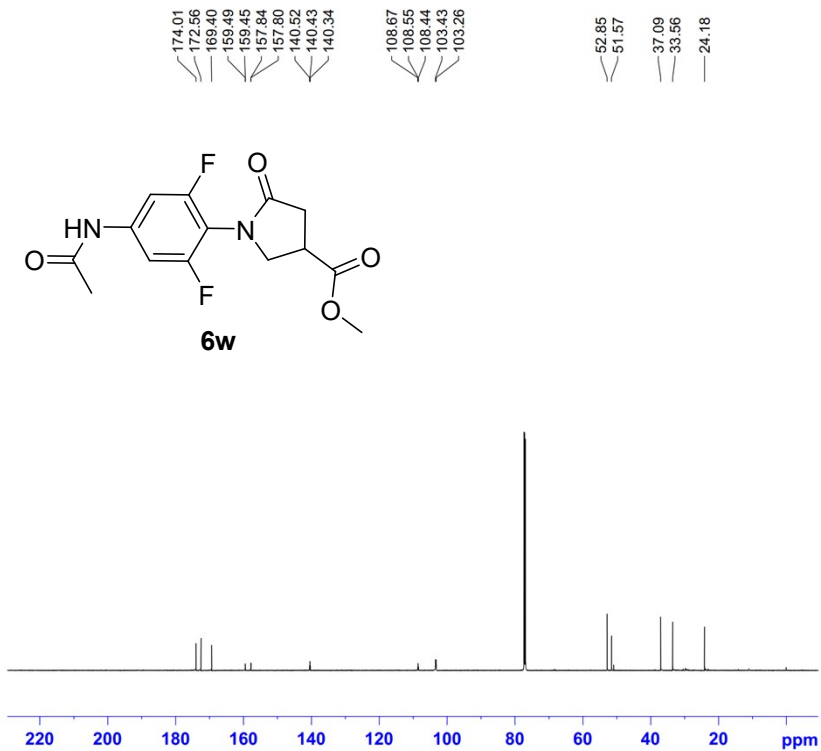

```

NAME      JOCamide 6w
EXPNO     5
PROCNO    1
Date_     20160422
Time      10.37
INSTRUM   spect
PROBHD    5 mm CPTCI 1H-
PULPROG   zgpg30
TD         65536
SOLVENT   CDCl3
NS         251
DS         4
SWH        36057.691 Hz
FIDRES     0.550197 Hz
AQ         0.9088159 sec
RG         107.97
DW         13.867 usec
DE         18.00 usec
TE         298.2 K
D1         2.0000000 sec
D11        0.0300000 sec
TD0        1

===== CHANNEL f1 =====
SFO1      150.9068340 MHz
NUC1       13C
P1         12.00 usec
SI         32768
SF         150.8902181 MHz
WDW        EM
SSB        0
LB         1.00 Hz
GB         0
PC         1.40

```
